# Supplementary material for: Exosomal miR-29b found in aqueous humour mediates calcium signaling in diabetic patients with cataract
Source: Research Square preprint supplement (doi:10.21203/rs.3.rs-34868/v3), 2020-10-28
Supplement: Supplementary file 1 [file 1e3e33d7c9d638bea20f1cbf.xlsx]

## Sheet: GO-BP of up-regulated genes
goID	goDescription	goType	geneRatio	bgRatio	pvalue	padj	qvalue	enrichScore	overlapGeneList	overlapGeneCount
GO:0010256	endomembrane system organization	biological process	297/9065	396/17381	3.0906e-21	2.60291e-17	1.87356e-17	1.43803	CXCR4/CDC42/AKT2/GOLGA5/GOLPH3L/HACE1/PDCD6IP/SOD1/SYNE1/SEC23IP/GAK/AP3D1/SNX19/CLCN3/POM121/SHTN1/SERP1/MAP2K1/USO1/EHD2/GOLGB1/GORASP2/PRMT5/P2RX7/HGS/MAPK3/CREB1/MTSS1/EPB41L3/MAPK1/YWHAZ/DNM2/AKT1/LRRK2/NDC1/SYNE2/A4GALT/NUP58/FAM109B/SURF4/CDK1/GBF1/SEC61A1/TMED2/SNX9/TMEM33/RAB5B/SUN2/NDEL1/UBXN2A/TMEM127/ARL6IP1/ARL1/TSG101/MPP5/ZNF385A/NUP62/RAB11A/ATL2/CSNK1A1/TARDBP/ATL3/BAG5/GOLPH3/SH…	297
GO:0016570	histone modification	biological process	320/9065	444/17381	3.13985e-18	1.32219e-14	9.51705e-15	1.38189	222	320
GO:0010498	proteasomal protein catabolic process	biological process	315/9065	437/17381	5.58851e-18	1.56888e-14	1.12927e-14	1.38209	PLK2/CEBPA/CCNF/HSPA1A/OSBPL7/RNF138/ANKIB1/PIAS1/FAF1/FBXW7/KLHL42/HSP90B1/ANAPC16/UBE2I/CLOCK/TP53/SIAH1/SIRT1/FHIT/N4BP1/BTBD3/PMAIP1/TRIB2/AKT1/LRRK2/MDM2/GID4/TAF9/UBE2C/HSP90AB1/CDC20/BUB1B/SENP1/DDB1/CDK1/WWTR1/BTRC/RNF7/SPOPL/KCTD10/UBXN2A/PSMD9/FBXL5/ATE1/SOCS4/CD2AP/RNF145/RNF41/KLHL20/RNF6/FBXL3/CSNK1A1/RNF111/SEC61B/CUL4B/BAG5/UGGT2/MAD2L1/NOP53/SMARCC1/MAN1B1/HERC2/TRIM9/DNAJC10/PSME…	315
GO:0018205	peptidyl-lysine modification	biological process	279/9065	381/17381	1.41494e-17	2.97915e-14	2.14438e-14	1.40406	DNMT1/MYB/CHEK1/HDAC4/DNMT3B/SET/PWP1/EHMT2/EHMT1/ASH2L/BRCA2/BRCA1/MITF/POM121/EGR2/PIAS1/EP300/EZH2/MECP2/PHF20/LIF/RPS6KA5/CREBBP/UBE2I/CLOCK/SPI1/SMAD4/MAPK3/BRD7/SP3/SIRT1/DOHH/SNAI2/MDM2/PRDM16/TAF9/NDC1/NUP58/JADE3/LEF1/KMT5A/RBBP5/NSD2/SENP1/TOP2A/PCNA/HIST1H1D/PHF19/VCPKMT/SETD1B/SOX4/TOLLIP/KMT5B/ARID4B/KMT2D/SMYD2/EZH1/KANSL1/EPC1/JARID2/NUP62/BRD1/SIN3A/P3H3/HIST1H1B/TRPM4/NUP50/KAT2A…	279
GO:0045787	positive regulation of cell cycle	biological process	273/9065	374/17381	6.39535e-17	1.0164e-13	7.31599e-14	1.39958	HES1/GATA6/CDC25A/CCND2/CDC42/PLK2/CDK9/CCND1/CDKN1A/E2F1/CHEK1/KIF23/ANXA1/CENPJ/RAD51C/CCND3/EGFR/IGF1/BRCA2/BRCA1/ATM/FGFR1/MED1/EP300/PRKCE/HMGA2/CNOT6/MECP2/APP/CCNL1/CDK10/CDKN1B/HNRNPU/EDN1/IGF2/TP53/BCL2L11/RB1/TP73/CTGF/AKT1/MDM2/RHOA/DDX3X/CDK4/BAX/GADD45A/UBE2C/RACGAP1/PSRC1/NDC80/ECT2/HSP90AB1/TERT/CDK1/CDCA5/CDC6/PCNA/CDT1/ESPL1/FEN1/SOX4/TNKS1BP1/MAPRE3/CNOT4/ZNF385A/NUP62/RAB11A/WN…	273
GO:0043161	proteasome-mediated ubiquitin-dependent protein catabolic process	biological process	281/9065	387/17381	7.24104e-17	1.0164e-13	7.31599e-14	1.3922	PLK2/CEBPA/CCNF/HSPA1A/RNF138/ANKIB1/PIAS1/FAF1/FBXW7/KLHL42/HSP90B1/ANAPC16/UBE2I/CLOCK/TP53/SIAH1/SIRT1/FHIT/N4BP1/BTBD3/TRIB2/AKT1/LRRK2/MDM2/GID4/TAF9/UBE2C/HSP90AB1/CDC20/BUB1B/SENP1/DDB1/CDK1/WWTR1/BTRC/RNF7/SPOPL/KCTD10/UBXN2A/PSMD9/FBXL5/SOCS4/CD2AP/RNF145/KLHL20/RNF6/FBXL3/CSNK1A1/RNF111/SEC61B/BAG5/MAD2L1/NOP53/SMARCC1/MAN1B1/HERC2/TRIM9/DNAJC10/PSME1/FBXO45/CCNB1/GLMN/CCDC47/CAV1/TMUB1…	281
GO:0031331	positive regulation of cellular catabolic process	biological process	286/9065	396/17381	1.25907e-16	1.51485e-13	1.09038e-13	1.38477	TP53INP1/PLK2/CEBPA/AKT2/HSPA1A/FOXO1/LRP1/CTSC/IGF1/OSBPL7/RNF138/ANKIB1/ATM/PIAS1/FBXW7/ANAPC16/PTK2/HNRNPD/IRS1/P2RX7/CPT1A/HMOX1/PPARA/HIF1A/MAPK3/UVRAG/HK2/SIRT1/MSN/KDR/MTDH/IFNG/TBK1/TRIB2/LDLR/AKT1/LRRK2/MDM2/ADAM9/ZFP36L2/BAX/HMGB1/UBE2C/PIP4K2C/CDC20/BUB1B/SESN2/CDK1/FBXO5/CDC37/SNX9/BTRC/SMCR8/PSMD9/PRKAA1/FBXL5/STK11/SOCS4/RAB12/FYCO1/PIP4K2B/CSNK1A1/TRIM22/RALB/MAD2L1/NOP53/RGN/CCDC2…	286
GO:0019080	viral gene expression	biological process	154/9065	191/17381	1.7192e-16	1.80988e-13	1.30274e-13	1.54595	CDK9/JUN/PTBP1/POLR2K/POM121/NELFCD/EP300/HMGA2/HPN/HDAC1/PFN1/NDC1/POLR2D/NUP58/LEF1/RSF1/NUP62/TARDBP/IFITM3/NUP50/POM121C/SMARCB1/POLR2I/NUP160/NUP210/CCNT2/SP1/RPS8/RPS2/UBA52/RPL36A/RPL29/RPL18A/RPL3/RPS6/NUP153/POLR2A/RPL4/RPLP1/RPS14/POLR2L/RPL7A/RPL10/RPL18/RPL37/RPL13/NELFE/RRP1B/RPS27/RPL8/RPS15A/RPS5/EIF3D/POLR2B/RPL10A/SMARCA4/CHD1/RANBP2/RPS18/RPS10/TRIM27/RPS3A/USF1/RPS28/RPLP0/RPS4…	154
GO:0048732	gland development	biological process	301/9065	422/17381	3.34363e-16	3.12889e-13	2.25216e-13	1.36761	HES1/GATA6/WNT3A/KRAS/CDC42/UCP2/CEBPA/AKT2/CCND1/FADD/PLAG1/ESR1/ANXA1/BCL2/WT1/JUN/HOXA5/SOD1/MAFB/RARG/NRP1/IQGAP3/GNPNAT1/EGFR/PKM/HAND2/BRCA2/SERPINB5/NOTCH4/ATM/MAP2K1/FGFR1/MED1/VEGFA/ETS1/EZH2/FBXW7/HNRNPD/HPN/UMPS/CDKN1C/PRMT5/CSF1/DDR1/HMOX1/CDKN1B/SOX2/NF1/ERBB4/BMP7/CCKBR/HIF1A/FGF7/SRF/CRKL/SMAD4/SOX9/MAPK3/PDGFRA/SP3/CREB1/PTCH1/HK2/BCL2L11/MAPK1/MSN/SCRIB/SRSF1/IGFBP5/NFKBIA/TGFBR2…	301
GO:0019083	viral transcription	biological process	144/9065	177/17381	3.74809e-16	3.15664e-13	2.27213e-13	1.5599	CDK9/JUN/POLR2K/POM121/NELFCD/EP300/HMGA2/HPN/HDAC1/PFN1/NDC1/POLR2D/NUP58/LEF1/RSF1/NUP62/TARDBP/IFITM3/NUP50/POM121C/SMARCB1/POLR2I/NUP160/NUP210/CCNT2/SP1/RPS8/RPS2/UBA52/RPL36A/RPL29/RPL18A/RPL3/RPS6/NUP153/POLR2A/RPL4/RPLP1/RPS14/POLR2L/RPL7A/RPL10/RPL18/RPL37/RPL13/NELFE/RRP1B/RPS27/RPL8/RPS15A/RPS5/POLR2B/RPL10A/SMARCA4/CHD1/RANBP2/RPS18/RPS10/TRIM27/RPS3A/USF1/RPS28/RPLP0/RPS4X/SUPT5H/NUC…	144
GO:0009896	positive regulation of catabolic process	biological process	316/9065	447/17381	4.65175e-16	3.56155e-13	2.56358e-13	1.35546	TP53INP1/PLK2/CEBPA/AKT2/HSPA1A/FOXO1/LRP1/CTSC/IGF1/GJA1/OSBPL7/RNF138/ANKIB1/ATM/PIAS1/PRKCE/FBXW7/ANAPC16/PTK2/HNRNPD/SNX1/IRS1/P2RX7/CPT1A/HMOX1/CDKN1B/PPARA/HIF1A/SOX9/MAPK3/UVRAG/HK2/SIRT1/MSN/KDR/EGLN2/MTDH/IFNG/TBK1/TRIB2/LDLR/AKT1/LRRK2/CSNK2A1/MDM2/ADAM9/ZFP36L2/BAX/BARD1/HMGB1/UBE2C/PIP4K2C/CDC20/BUB1B/DDB1/SESN2/CDK1/FBXO5/CDC37/SNX9/LPCAT1/BTRC/SMCR8/PSMD9/PRKAA1/FBXL5/STK11/SOCS4/RN…	316
GO:0198738	cell-cell signaling by wnt	biological process	336/9065	483/17381	2.2631e-15	1.58832e-12	1.14326e-12	1.33383	NLK/WNT3A/CDC42/TLR2/CCND1/FOXO3/ESR1/ZEB2/CCNE1/PPM1A/FOXO1/LRP1/RARG/MOV10/RNF138/KLF4/CDK14/LRP4/CYLD/COL1A1/NFKB1/WNT9B/DVL2/RNF213/FERMT2/SOX2/SOX9/BRD7/HDAC1/IGFBP2/XIAP/ILK/GPC4/FGF9/NOTCH1/SDC1/RAB5A/LRRK2/PFN1/CSNK2A1/SNAI2/RHOA/DDX3X/LEF1/TERT/DDB1/ASPM/SULF2/WWTR1/APCDD1/BTRC/SOX4/HHEX/CSNK1G1/PSMD9/PRKAA1/AGO1/STK11/GRB10/CBFB/TCF7L1/TLE4/WNT5A/MESD/HMGXB4/CSNK1A1/TMEM64/FGFR2/AP2S1/W…	336
GO:0016055	Wnt signaling pathway	biological process	334/9065	481/17381	4.12138e-15	2.67002e-12	1.92187e-12	1.3314	NLK/WNT3A/CDC42/TLR2/CCND1/FOXO3/ESR1/ZEB2/CCNE1/PPM1A/FOXO1/LRP1/RARG/MOV10/RNF138/KLF4/CDK14/LRP4/CYLD/COL1A1/NFKB1/WNT9B/DVL2/RNF213/FERMT2/SOX2/SOX9/BRD7/HDAC1/IGFBP2/XIAP/ILK/GPC4/FGF9/NOTCH1/SDC1/RAB5A/LRRK2/PFN1/CSNK2A1/SNAI2/RHOA/DDX3X/LEF1/TERT/DDB1/ASPM/SULF2/WWTR1/APCDD1/BTRC/SOX4/HHEX/CSNK1G1/PSMD9/PRKAA1/AGO1/STK11/GRB10/CBFB/TCF7L1/TLE4/WNT5A/MESD/HMGXB4/CSNK1A1/TMEM64/FGFR2/AP2S1/W…	334
GO:0006402	mRNA catabolic process	biological process	248/9065	342/17381	6.24148e-15	3.7547e-12	2.70261e-12	1.39038	E2F1/HSPA1A/RNASEL/SET/DDX5/ATM/CNOT6/HNRNPD/HNRNPU/YWHAZ/AKT1/POLR2D/ZFP36L2/TTC37/XPO1/EIF4B/RBM8A/TNKS1BP1/PSMD9/PAPD4/AGO1/CNOT4/DDX6/TARDBP/PDE12/EIF4G1/PPP2R2A/EIF4E/ANP32A/YTHDF2/PSME1/PAN3/IGF2BP3/CPEB3/IGF2BP1/YBX1/RPS8/PNRC1/RPS2/EDC3/DHX34/UBA52/PSMD3/RPL36A/UBB/LSM2/RPL29/PAIP1/RPL18A/TNRC6B/PSMB2/LARP1/SECISBP2/RPL3/RPS6/MTOR/HNRNPC/SAMD4B/RPL4/RPLP1/HSPA1B/RPS14/MEX3D/RPL7A/RPL10/EI…	248
GO:0008380	RNA splicing	biological process	301/9065	428/17381	7.04053e-15	3.95302e-12	2.84536e-12	1.34843	GEMIN2/WT1/HSPA1A/PNN/TIA1/RBMXL1/PTBP2/PTBP1/GCFC2/POLR2K/DHX15/DDX5/SRSF11/HNRNPD/CPSF1/RBM4/FUS/PRMT5/SRSF9/HNRNPU/GEMIN4/TRA2B/SRSF1/CDK13/RBFOX2/SRSF7/DDX39A/SREK1IP1/POLR2D/HNRNPL/PSIP1/RAVER1/PRPF40B/RBM8A/WDR62/USP39/SPEN/HNRNPUL1/WDR33/SON/MBNL1/PAPOLA/SRSF2/HABP4/SRSF3/SF1/SRSF6/TARDBP/SRRM1/YTHDC1/SYMPK/CPSF3/HNRNPH1/RBM42/ZNF326/SCAF11/SRSF4/SREK1/SNRNP35/HNRNPA1L2/BRDT/FRG1/RBM39/SUG…	301
GO:0051169	nuclear transport	biological process	330/9065	476/17381	8.56502e-15	4.28568e-12	3.0848e-12	1.32927	DRD1/HES1/WNT3A/TLR2/CDKN1A/GEMIN2/JUN/PPM1A/SET/POLA2/F2/EGFR/ANP32B/IGF1/TMSB4X/SUFU/XPO6/POM121/UHMK1/RERE/EGR2/MED1/FAF1/MAPK7/ATXN1/PIK3R2/APP/SRSF11/CPSF1/RBM4/CYLD/SRSF9/NF1/TP53/ERBB4/GEMIN4/BMP7/SMAD4/SIRT1/MAPK1/TLR4/SRSF1/NFKBIA/PTGS2/HMGA1/FGF9/IFNG/STAT3/AKT1/LRRK2/SNAI2/MDM2/RHOA/TGFBR1/SRSF7/DDX39A/NDC1/POLR2D/DNAJC27/BARD1/PSIP1/XPO1/STRADB/NUP58/ECT2/HSP90AB1/NMD3/CDK1/KPNA2/NLRP…	330
GO:0048568	embryonic organ development	biological process	297/9065	422/17381	9.14588e-15	4.28568e-12	3.0848e-12	1.34943	MEF2C/HES1/ACVR1/CDX2/WNT3A/CEBPA/GATA4/HOXA5/SOD1/MAFB/GRB2/RARG/EGFR/ARID2/ARID1A/CYR61/HAND2/HOXD10/SUFU/HOXB8/ZEB1/CHST11/HOXA7/MAP2K1/FGFR1/MED1/VEGFA/IFT52/HPN/HOXB7/CDKN1C/LIF/JUNB/CXCL8/ZFPM2/WNT9B/DVL2/EDN1/IGF2/BMP7/HIF1A/SRF/SOX9/MAPK3/PDGFRA/SP3/PTCH1/MAPK1/SCRIB/KDR/TRA2B/FGF9/TGFBR2/NOTCH1/PAX6/AKT1/RUNX2/SMAD2/FOXF2/TGFBR1/CEBPB/NIPBL/KRT19/PHLDA2/LEF1/EPHA2/SIX1/NSDHL/POLE/MTHFD1/…	297
GO:0006397	mRNA processing	biological process	339/9065	491/17381	9.1596e-15	4.28568e-12	3.0848e-12	1.32381	CDK9/GEMIN2/GTF2H1/HSPA1A/PNN/RNASEL/TIA1/RBMXL1/PTBP2/PTBP1/GCFC2/POLR2K/DHX15/DDX5/ADAR/APP/SRSF11/HNRNPD/CPSF1/RBM4/FUS/PRMT5/SRSF9/HNRNPU/GEMIN4/TRA2B/SRSF1/CDK13/RBFOX2/SRSF7/DDX39A/SREK1IP1/POLR2D/BARD1/HNRNPL/PSIP1/RAVER1/PRPF40B/RBM8A/USP39/SPEN/HNRNPUL1/WDR33/ADARB1/SON/PAPD4/MBNL1/PAPOLA/SRSF2/HABP4/SRSF3/SF1/SRSF6/SLTM/TARDBP/SRRM1/YTHDC1/SYMPK/CPSF3/HNRNPH1/RBM42/SLBP/ZNF326/SCAF11/SR…	339
GO:0006913	nucleocytoplasmic transport	biological process	326/9065	470/17381	1.12352e-14	4.98016e-12	3.58469e-12	1.32992	DRD1/HES1/WNT3A/TLR2/CDKN1A/GEMIN2/JUN/PPM1A/SET/POLA2/F2/EGFR/ANP32B/IGF1/TMSB4X/SUFU/XPO6/POM121/UHMK1/RERE/EGR2/MED1/FAF1/MAPK7/ATXN1/PIK3R2/APP/SRSF11/CPSF1/RBM4/CYLD/SRSF9/NF1/TP53/ERBB4/GEMIN4/BMP7/SMAD4/SIRT1/MAPK1/TLR4/SRSF1/NFKBIA/PTGS2/FGF9/IFNG/STAT3/AKT1/LRRK2/SNAI2/MDM2/RHOA/TGFBR1/SRSF7/DDX39A/NDC1/POLR2D/DNAJC27/BARD1/XPO1/STRADB/NUP58/ECT2/HSP90AB1/NMD3/CDK1/KPNA2/NLRP3/CDH1/RBM8A…	326
GO:0042176	regulation of protein catabolic process	biological process	282/9065	399/17381	1.88704e-14	7.94634e-12	5.71973e-12	1.35514	CDC42/PLK2/CEBPA/HSPA1A/FOXO1/LRP1/EGFR/CTSC/ANXA2/GJA1/SUFU/OSBPL7/RNF138/ANKIB1/TIMP3/PIAS1/FAF1/FBXW7/ANAPC16/PTK2/SNX1/HGS/CDKN1B/SOX9/FHIT/N4BP1/MSN/TIMP2/EGLN2/IFNG/TRIB2/LDLR/AKT1/LRRK2/CSNK2A1/MDM2/ADAM9/TAF9/BARD1/XPO1/UBE2C/HSP90AB1/CDC20/BUB1B/SENP1/DDB1/CDK1/FBXO5/SNX9/LPCAT1/BTRC/SNX12/EPHA4/UBXN2A/PSMD9/FBXL5/SOCS4/RNF41/WNT5A/CSNK1A1/CUL4B/BAG5/MAD2L1/NOP53/SMARCC1/FLNA/RGN/CCDC22/…	282
GO:0034504	protein localization to nucleus	biological process	265/9065	372/17381	2.57874e-14	1.0342e-11	7.44408e-12	1.36587	DRD1/HES1/WNT3A/TLR2/CDKN1A/JUN/PPM1A/SYNE1/POLA2/F2/EGFR/IGF1/TMSB4X/SUFU/POM121/RERE/MED1/FAF1/MAPK7/PIK3R2/APP/CYLD/COL1A1/LIF/HNRNPU/NF1/ERBB4/BMP7/SMAD4/SOX9/SIRT1/MAPK1/TLR4/NFKBIA/PTGS2/FGF9/IFNG/STAT3/AKT1/LRRK2/SNAI2/MDM2/RHOA/TGFBR1/SYNE2/XPO1/NUP58/ECT2/HSP90AB1/TERT/NMD3/SESN2/CDK1/KPNA2/SIX1/NLRP3/CDH1/SULF2/WWTR1/NF2/TNPO2/GPN1/CCT3/IL6/SUN2/HHEX/SIX4/STK11/CD2AP/RAN/NUP62/SEC61B/SI…	265
GO:0072331	signal transduction by p53 class mediator	biological process	201/9065	270/17381	3.09101e-14	1.18329e-11	8.51729e-12	1.42738	TP53INP1/SPRED1/PLK2/MYO6/CDKN1A/E2F1/CHEK1/FOXO3/CENPJ/MSH2/EHMT2/EHMT1/BRCA2/BRCA1/DDX5/ATM/EP300/CNOT6/TAF4B/PHF20/PRMT5/MTA2/CDKN1B/TP53/BRD7/SIRT1/HDAC1/FHIT/CD44/TP73/PMAIP1/AKT1/CSNK2A1/SNAI2/MDM2/TAF9/RBBP7/BAX/GADD45A/RFC5/BARD1/EXO1/RFC4/KMT5A/SESN2/CDK1/CHD4/PCNA/E2F2/BLM/SOX4/RPA2/TNKS1BP1/PRKAA1/STK11/TMEM109/SMYD2/CNOT4/ZNF385A/NUAK1/SPRED2/AEN/MRE11/NOP53/HDAC2/PRKAG1/RFC2/NOC2L/TR…	201
GO:0006914	autophagy	biological process	324/9065	470/17381	5.00374e-14	1.75589e-11	1.26388e-11	1.32176	MET/S100A9/TP53INP1/PLK2/GATA4/BCL2/MCL1/FOXO1/SNX6/ITGB4/ATP6V0A1/OSBPL7/ATM/ITPR1/ATP6V1B2/EP300/WDR6/FBXW7/PIK3R2/HMOX1/HGS/SNAPIN/TP53/HIF1A/MAPK3/ATG2B/UVRAG/HK2/SIRT1/KDR/MTDH/IFNG/TBK1/RB1CC1/RAB5A/AKT1/LRRK2/CSNK2A1/MAPK8/HMGB1/PIP4K2C/SESN2/VAMP8/CDC37/SMCR8/DYNLL2/RAB1B/TOLLIP/UBXN2A/PRKAA1/ATP6V1C1/STK11/TSG101/RNF41/RAB12/FYCO1/PSAP/PIP4K2B/TRIM22/ABL2/USP33/CAPN1/VMP1/RALB/KAT2A/ATP6…	324
GO:0061919	process utilizing autophagic mechanism	biological process	324/9065	470/17381	5.00374e-14	1.75589e-11	1.26388e-11	1.32176	MET/S100A9/TP53INP1/PLK2/GATA4/BCL2/MCL1/FOXO1/SNX6/ITGB4/ATP6V0A1/OSBPL7/ATM/ITPR1/ATP6V1B2/EP300/WDR6/FBXW7/PIK3R2/HMOX1/HGS/SNAPIN/TP53/HIF1A/MAPK3/ATG2B/UVRAG/HK2/SIRT1/KDR/MTDH/IFNG/TBK1/RB1CC1/RAB5A/AKT1/LRRK2/CSNK2A1/MAPK8/HMGB1/PIP4K2C/SESN2/VAMP8/CDC37/SMCR8/DYNLL2/RAB1B/TOLLIP/UBXN2A/PRKAA1/ATP6V1C1/STK11/TSG101/RNF41/RAB12/FYCO1/PSAP/PIP4K2B/TRIM22/ABL2/USP33/CAPN1/VMP1/RALB/KAT2A/ATP6…	324
GO:0033044	regulation of chromosome organization	biological process	219/9065	301/17381	1.35487e-13	4.56428e-11	3.28534e-11	1.39503	DNMT1/MYB/CDK9/CHEK1/H3F3B/DNMT3B/SET/UHRF1/TTK/BRCA1/ATM/VEGFA/MECP2/HNRNPD/PRKD2/LIF/RPS6KA5/HNRNPU/IGF2/TP53/SPI1/SMAD4/MAPK3/BRD7/SIRT1/OTUB1/MAPK1/RB1/HMGA1/LRRK2/SNAI2/MAPK8/NIPBL/UBE2C/TRIP13/NDC80/BUB1B/TOP2A/CDCA5/CDC6/CDT1/TACC3/PHF19/ESPL1/FEN1/CCT3/ASF1A/JARID2/SIN3A/HIST1H1B/DYNC1LI1/PAXBP1/MRE11/MKI67/MAD2L1/KAT2A/CENPF/ZNF207/SMARCB1/MYOCD/NOC2L/GATA3/CTBP1/HNRNPA1/UBR5/MIER1/CCNB1…	219
GO:0071900	regulation of protein serine/threonine kinase activity	biological process	337/9065	495/17381	2.19167e-13	7.01916e-11	5.05235e-11	1.30536	CXCR4/NTRK3/CDC25A/CCND2/IRAK2/KRAS/SPRED1/CEBPA/CCND1/CDKN1A/TRAF6/IRAK1/ZEB2/PDCD4/GTF2H1/CCND3/CCNE2/RGS3/PAK1/SOD1/MAP3K8/THBS1/HACD3/IQGAP3/EGFR/IGF1/CRK/MAP2K1/FGFR1/VEGFA/MAPK7/EZH2/CSK/FGF2/CCNL1/PRKAR2A/CDKN1C/P2RX7/IGF1R/CALM3/PEA15/DVL2/HGS/CDKN1B/EDN1/CD40LG/NF1/HRAS/CDKN3/IGF2/ERBB2/MAP3K11/BMP7/CALM2/CRKL/MAPK3/UVRAG/SIRT1/CDKN2A/MAPK1/FLT1/TLR4/ILK/PIK3CG/TP73/IFNG/RAP1A/TRIB2/FLT3…	337
GO:0035239	tube morphogenesis	biological process	247/9065	347/17381	2.25027e-13	7.01916e-11	5.05235e-11	1.36482	MEF2C/MET/HES1/ACVR1/GATA6/WNT3A/KRAS/GATA4/ESR1/TRAF6/ZEB2/BCL2/WT1/HOXA5/PAK1/FOXP1/RHOB/RARG/NRP1/EGFR/ARID1A/HAND2/SUFU/ZEB1/SDC4/NOTCH4/MED1/VEGFA/IFT52/FGF2/AGR2/PRKD2/HOXB7/WNK4/CSF1/DDR1/WNT9B/DVL2/EDN1/BMP7/HIF1A/SRF/SMAD4/SOX9/PDGFRA/PTCH1/MTSS1/ACVR2B/BCL2L11/SCRIB/ILK/PODXL/TGFBR2/NOTCH1/PFN1/SMAD2/EDNRA/RHOA/NIPBL/LEF1/ATOH8/EPHA2/VASP/SIX1/MTHFD1/TMED2/CLIC4/BTRC/MYCN/SOX4/EPHA4/HHE…	247
GO:0001701	in utero embryonic development	biological process	227/9065	315/17381	2.62291e-13	7.88934e-11	5.6787e-11	1.38173	HES1/ACVR1/GATA6/CDX2/WNT3A/CEBPA/MSH2/GRB2/TPM1/EGFR/CYR61/HAND2/IGF1/BRCA2/ADAR/SOX6/MAP2K1/FGFR1/MED1/VEGFA/CDKN1C/LIF/JUNB/ZFPM2/WNT9B/EDN1/IGF2/BMP7/HIF1A/SRF/SMAD4/PDGFRA/SP3/PTCH1/BCL2L11/MAPK1/SRSF1/TGFBR2/NOTCH1/AKT1/SMAD2/EDNRA/TGFBR1/CEBPB/KRT19/PHLDA2/LEF1/NSDHL/C5/TMED2/HHEX/NDEL1/MBNL1/HEG1/GINS1/BTF3/PTPRR/FGFR2/GJB3/SIN3A/KAT2A/MFN2/GLI2/GNA13/GATA3/SLC39A3/ZNF568/CCNB1/COPS3/RDH1…	227
GO:0000075	cell cycle checkpoint	biological process	170/9065	225/17381	3.24057e-13	9.41106e-11	6.77403e-11	1.44868	PLK2/CCND1/CDKN1A/E2F1/CHEK1/CDC14B/CENPJ/CEP63/MSH2/CCNE2/TTK/BRCA1/ATM/EP300/HMGA2/CNOT6/PEA15/CDKN1B/CLOCK/HRAS/TP53/RB1/TP73/AKT1/MDM2/BAX/GADD45A/DONSON/FANCI/KNTC1/TRIP13/NDC80/BUB1B/FANCG/CDK1/TOP2A/TICRR/CDC6/PCNA/CDT1/ZWINT/BLM/DCLRE1B/SOX4/RPA2/TNKS1BP1/CNOT4/ZNF385A/MDC1/DYNC1LI1/MRE11/MAD2L1/NOP53/CENPF/ZNF207/SFN/CCNB1/RAD9A/UBA52/UBB/CCAR2/RPS6/CNOT1/INTS3/FZR1/TGFB1/VPS4A/CDC45/GIG…	170
GO:0006401	RNA catabolic process	biological process	264/9065	376/17381	4.38807e-13	1.23188e-10	8.86697e-11	1.34624	E2F1/HSPA1A/RNASEL/SET/DDX5/ATM/CNOT6/HNRNPD/HNRNPU/YWHAZ/AKT1/POLR2D/ZFP36L2/TTC37/XPO1/EIF4B/RBM8A/FEN1/TNKS1BP1/PSMD9/PAPD4/AGO1/CNOT4/DDX6/TARDBP/PDE12/EIF4G1/PPP2R2A/EIF4E/ANP32A/YTHDF2/DROSHA/PSME1/ISG20/PAN3/IGF2BP3/CPEB3/LIN28B/IGF2BP1/YBX1/RPS8/PNRC1/RPS2/EDC3/DHX34/UBA52/XRN2/PSMD3/RPL36A/UBB/LSM2/RPL29/PAIP1/RPL18A/TNRC6B/PSMB2/LARP1/SECISBP2/RPL3/RPS6/MTOR/HNRNPC/SAMD4B/RPL4/RPLP1/HSP…	264
GO:0030900	forebrain development	biological process	257/9065	366/17381	8.84579e-13	2.4032e-10	1.72981e-10	1.34635	DRD1/HES1/WNT3A/KRAS/E2F1/NOTCH3/ZEB2/CDK6/LRP1/NRP1/EGFR/ARID1A/AXL/FGFR1/ETS1/EZH2/PEX13/APP/SOX2/NF1/ERBB4/HIF1A/SRF/CREB1/NTRK2/TRA2B/SLC8A1/BTBD3/NOTCH1/PAX6/LRRK2/CSNK2A1/LPAR1/CXCL12/BAX/DLX1/SYNE2/LEF1/HPRT1/CDH1/ASPM/WDR62/TACC3/TACC1/NF2/UQCRQ/SUN2/HHEX/NDEL1/LRP8/NFIB/PAPD4/EZH1/BCL11B/WNT5A/FRS2/KDM6B/DLC1/BCL2A1/BCAN/ARPC5/FGFR2/KIF5B/ATP2B4/DKK1/PLXNA4/C12orf57/KAT2A/OXTR/FLNA/RAPGE…	257
GO:0022613	ribonucleoprotein complex biogenesis	biological process	316/9065	464/17381	1.16211e-12	3.05853e-10	2.20151e-10	1.3058	GEMIN2/RNASEL/PTBP2/GCFC2/ADAR/ATM/CNOT6/PA2G4/PRMT5/SRSF9/NSUN4/DICER1/GEMIN4/SIRT1/SRSF1/NSUN5/TAF9/POLR2D/DDX3X/PSIP1/XPO1/MRPS9/HSP90AB1/NMD3/EIF4B/DDX21/TICRR/USP39/AGO1/BMT2/DDX6/WDR37/RAN/SF1/TSR1/SRSF6/YTHDC1/SAMD15/G3BP2/SCAF11/NOP53/FRG1/DROSHA/RPP40/RRP36/ZNF622/NOC2L/ISG20/SRSF5/PAN3/DIEXF/ABT1/RPUSD2/UTP20/DDX1/RPS8/RPS2/EDC3/LSM14A/RBM5/PDCD11/UBA52/XRN2/RPL36A/HSP90AA1/RPL29/ATXN2L…	316
GO:0030111	regulation of Wnt signaling pathway	biological process	231/9065	325/17381	1.72543e-12	4.4035e-10	3.16961e-10	1.36281	NLK/WNT3A/TLR2/CCND1/FOXO3/ESR1/ZEB2/PPM1A/FOXO1/LRP1/CDK14/LRP4/CYLD/COL1A1/NFKB1/DVL2/RNF213/SOX2/SOX9/HDAC1/IGFBP2/XIAP/ILK/FGF9/NOTCH1/LRRK2/CSNK2A1/SNAI2/DDX3X/LEF1/TERT/ASPM/SULF2/WWTR1/APCDD1/BTRC/SOX4/HHEX/PSMD9/STK11/GRB10/CBFB/TCF7L1/WNT5A/HMGXB4/CSNK1A1/TMEM64/FGFR2/WLS/JUP/DKK1/EMD/TRPM4/NXN/CTDNEP1/PSME1/ITGA3/FOLR1/UBR5/G3BP1/CDH2/SRC/LGR4/CAV1/AXIN1/UBA52/ZNF703/PSMD3/UBB/CCAR2/BAM…	231
GO:0030522	intracellular receptor signaling pathway	biological process	207/9065	287/17381	2.57172e-12	6.37029e-10	4.5853e-10	1.38291	IRAK2/ESR1/TRAF6/IRAK1/ASXL2/HSPA1A/CCNE1/PAK1/FOXP1/RARG/NOTCH2/ARID1A/BRCA1/DDX5/PIAS1/MED1/EP300/EZH2/HNF4A/IKBKB/NR1I2/RXRB/DCBLD2/MED16/CYLD/PIM1/PPARA/UBE2I/CLOCK/CHUK/PPARG/NRIP1/SIRT1/HDAC1/RB1/TLR4/XIAP/NFKBIA/EGLN2/STAT3/RBFOX2/SNAI2/NR6A1/KANK2/CRY2/NR3C1/AHR/KMT2D/CBFB/ERBIN/RAN/RNF6/YWHAH/MED4/IRF7/PGR/CALR/ACTN4/NOP53/NR5A2/PTPN22/DDX60/ANKRD17/CTBP2/TRIM24/UBR5/RIPK2/SRC/NR4A3/NR4A…	207
GO:0019058	viral life cycle	biological process	223/9065	313/17381	2.84458e-12	6.73146e-10	4.84526e-10	1.36605	CXCR4/CDC42/BCL2/HSPA1A/PDCD6IP/RNASEL/HACD3/PPIB/EGFR/ANPEP/POM121/AXL/DDX5/ADAR/HMGA2/NFIA/CXCL8/UVRAG/NCAM1/NOTCH1/IFITM1/RAB5A/LDLR/CD46/NDC1/VAPA/DDX3X/FAM111A/XPO1/SLC1A5/NUP58/HSP90AB1/EPHA2/DDB1/CDK1/KPNA2/TOP2A/VAMP8/RAB1B/ADARB1/TSG101/TRIM59/DDX6/RAN/NUP62/RSAD2/IFIT1/ISG15/IFITM3/OASL/IFIT5/CD80/SLPI/LGALS1/TRIM26/NUP50/NR5A2/PDE12/POM121C/SMARCB1/PPIA/CHMP2A/NUP160/NUP210/IST1/CTBP2/…	223
GO:0000375	RNA splicing, via transesterification reactions	biological process	231/9065	326/17381	2.87737e-12	6.73146e-10	4.84526e-10	1.35863	GEMIN2/PNN/TIA1/PTBP2/PTBP1/GCFC2/POLR2K/DHX15/DDX5/SRSF11/HNRNPD/CPSF1/RBM4/FUS/PRMT5/SRSF9/HNRNPU/GEMIN4/TRA2B/SRSF1/CDK13/RBFOX2/SRSF7/DDX39A/POLR2D/HNRNPL/PSIP1/RAVER1/PRPF40B/RBM8A/USP39/SPEN/HNRNPUL1/WDR33/SON/PAPOLA/SRSF2/SRSF3/SF1/SRSF6/SRRM1/YTHDC1/SYMPK/CPSF3/HNRNPH1/RBM42/SCAF11/SRSF4/SREK1/SNRNP35/FRG1/SUGP1/POLR2I/CSTF3/DDX42/PQBP1/EFTUD2/SRSF5/HNRNPA1/HNRNPA3/DYRK1A/SRRT/YBX1/DDX1/S…	231
GO:0060562	epithelial tube morphogenesis	biological process	221/9065	310/17381	3.22083e-12	7.33131e-10	5.27703e-10	1.3669	MEF2C/MET/HES1/ACVR1/WNT3A/KRAS/GATA4/ESR1/TRAF6/ZEB2/BCL2/WT1/HOXA5/PAK1/FOXP1/RHOB/RARG/NRP1/ARID1A/HAND2/SUFU/SDC4/NOTCH4/MED1/VEGFA/IFT52/FGF2/PRKD2/HOXB7/WNK4/CSF1/DDR1/WNT9B/DVL2/EDN1/BMP7/HIF1A/SRF/SMAD4/SOX9/PTCH1/MTSS1/SCRIB/ILK/PODXL/TGFBR2/NOTCH1/PFN1/EDNRA/RHOA/LEF1/EPHA2/VASP/SIX1/MTHFD1/TMED2/CLIC4/BTRC/MYCN/SOX4/EPHA4/HHEX/SIX4/LUZP1/WNT5A/DLC1/PGR/SPRY2/FGFR2/KLHL3/KAT2A/B4GALT1/G…	221
GO:0051052	regulation of DNA metabolic process	biological process	270/9065	391/17381	4.84669e-12	1.03455e-09	7.44662e-10	1.32402	DNMT1/CDC42/CDK9/CDKN1A/CHEK1/JUN/MSH2/UHRF1/EHMT2/EGFR/IGF1/BRCA2/BRCA1/GJA1/ATM/KLF4/FGFR1/HMGA2/RAD51/FBXW7/HNRNPD/PRKD2/PRMT5/IGF1R/TSPYL2/HNRNPU/HRAS/TP53/SPI1/PPARG/MAPK3/PDGFRA/SIRT1/GMNN/OTUB1/MAPK1/IFNG/MGMT/BMPR2/AKT1/PFN1/UNG/BAX/RFC5/DONSON/HMGB1/RFC4/HSP90AB1/NSD2/NPPC/POLQ/ZNF365/CDK1/KPNA2/CHTF18/DSCC1/MSH6/TICRR/CDC6/PCNA/CDT1/NF2/BLM/CCT3/IL6/RPA2/SHC1/TEX15/CALR/MRE11/RGN/RFC2/I…	270
GO:0006605	protein targeting	biological process	273/9065	396/17381	4.9424e-12	1.03455e-09	7.44662e-10	1.32183	HES1/AKT2/BAP1/PAK1/YWHAQ/GOLGA7/AP3B1/HPS4/MTX1/KCNE1/PEX13/FBXW7/HSPD1/HSPA4/HGS/ERBB2/AKAP12/YWHAZ/LRRK2/NUCB1/STARD7/HHAT/TIMM50/PRNP/FAM20B/SEC61A1/CDC37/RAC2/ICMT/ARL6IP1/ERBIN/NKAP/RAB6A/SEC61B/DMTN/KAT2A/AP1S3/SEC62/MFN2/LONP2/CCL2/VAMP7/SSR1/CSNK2A2/PAN3/MIEF1/TIMM23/RPS8/RPS2/SRP68/UBA52/RPL36A/HSP90AA1/RPL29/WDR46/RPL18A/RPL3/RPS6/SREBF1/RPL4/RPLP1/RPS14/RPL7A/RPL10/HTRA2/RPL18/RPL37/R…	273
GO:1903362	regulation of cellular protein catabolic process	biological process	205/9065	285/17381	5.00823e-12	1.03455e-09	7.44662e-10	1.37916	PLK2/CEBPA/HSPA1A/LRP1/CTSC/ANXA2/SUFU/OSBPL7/RNF138/ANKIB1/PIAS1/FBXW7/ANAPC16/PTK2/FHIT/N4BP1/MSN/TRIB2/LDLR/AKT1/LRRK2/MDM2/TAF9/UBE2C/HSP90AB1/CDC20/BUB1B/SENP1/CDK1/FBXO5/BTRC/EPHA4/PSMD9/FBXL5/SOCS4/CSNK1A1/BAG5/MAD2L1/NOP53/SMARCC1/RGN/CCDC22/PSME1/UBAC2/CCNB1/GLMN/CAV1/AXIN1/UBA52/PSMD3/UBB/CCAR2/BAG6/PSMB2/RACK1/UBQLN4/PRKACA/ANAPC1/DVL1/PSMD4/FZR1/PSMD11/XBP1/RAD23A/USP5/SKP1/PSMC1/PLK1…	205
GO:0070646	protein modification by small protein removal	biological process	218/9065	306/17381	5.03639e-12	1.03455e-09	7.44662e-10	1.36597	CDC25A/ESR1/TRAF6/BAP1/ASXL2/RHOT1/BRCA1/EP300/CCNA2/CYLD/HGS/TP53/HIF1A/SMAD4/OTUB1/NFKBIA/SHMT2/MDM2/SMAD2/RHOA/CFTR/TGFBR1/CCP110/BARD1/CDC20/SENP1/CDK1/NLRP3/USP39/PSMD9/OTUD4/FOXK1/USP33/KAT2A/NOP53/PSME1/GATA3/RIPK2/ACTB/COPS3/USP24/AXIN1/MYC/UBA52/TRRAP/PSMD3/UBB/STAM2/USP12/PSMB2/TNKS/USP21/PSMD4/PSMD11/ADRM1/USP10/RAD23A/USP5/USP36/PSMC1/USP46/OTUD1/USP31/KEAP1/PSMB3/PSMA7/PARK7/BRCC3/MC…	218
GO:0000377	RNA splicing, via transesterification reactions with bulged adenosine as nucleophile	biological process	228/9065	323/17381	7.4111e-12	1.45154e-09	1.04481e-09	1.35344	GEMIN2/PNN/TIA1/PTBP2/PTBP1/GCFC2/POLR2K/DHX15/DDX5/SRSF11/HNRNPD/CPSF1/RBM4/FUS/PRMT5/SRSF9/HNRNPU/GEMIN4/TRA2B/SRSF1/CDK13/RBFOX2/SRSF7/DDX39A/POLR2D/HNRNPL/PSIP1/RAVER1/PRPF40B/RBM8A/USP39/SPEN/HNRNPUL1/WDR33/SON/PAPOLA/SRSF2/SRSF3/SF1/SRSF6/SRRM1/YTHDC1/SYMPK/CPSF3/HNRNPH1/RBM42/SCAF11/SRSF4/SREK1/SNRNP35/FRG1/SUGP1/POLR2I/CSTF3/DDX42/PQBP1/EFTUD2/SRSF5/HNRNPA1/HNRNPA3/DYRK1A/SRRT/YBX1/DDX1/S…	228
GO:0000398	mRNA splicing, via spliceosome	biological process	228/9065	323/17381	7.4111e-12	1.45154e-09	1.04481e-09	1.35344	GEMIN2/PNN/TIA1/PTBP2/PTBP1/GCFC2/POLR2K/DHX15/DDX5/SRSF11/HNRNPD/CPSF1/RBM4/FUS/PRMT5/SRSF9/HNRNPU/GEMIN4/TRA2B/SRSF1/CDK13/RBFOX2/SRSF7/DDX39A/POLR2D/HNRNPL/PSIP1/RAVER1/PRPF40B/RBM8A/USP39/SPEN/HNRNPUL1/WDR33/SON/PAPOLA/SRSF2/SRSF3/SF1/SRSF6/SRRM1/YTHDC1/SYMPK/CPSF3/HNRNPH1/RBM42/SCAF11/SRSF4/SREK1/SNRNP35/FRG1/SUGP1/POLR2I/CSTF3/DDX42/PQBP1/EFTUD2/SRSF5/HNRNPA1/HNRNPA3/DYRK1A/SRRT/YBX1/DDX1/S…	228
GO:0000819	sister chromatid segregation	biological process	170/9065	230/17381	8.27042e-12	1.58303e-09	1.13946e-09	1.41719	CDC14A/KIF23/CDC14B/RAD51C/TTK/ATM/FBXW7/KIF2A/HNRNPU/KIF22/RB1/MAPRE1/NSL1/NIPBL/SGO1/HASPIN/XPO1/CENPU/UBE2C/KNTC1/RACGAP1/PSRC1/TRIP13/NDC80/DSN1/NCAPG/SKA1/CDC20/BUB1B/NCAPH/CENPQ/DSCC1/TOP2A/CDCA5/NCAPD2/CDC6/CDT1/SPC25/TACC3/ZWINT/ESPL1/FEN1/DYNLL2/NDEL1/POGZ/CLIP1/CKAP5/NUP62/RAB11A/RCC2/SPC24/CHAMP1/DYNC1LI1/MRE11/MAD2L1/NCAPD3/CENPF/KIF4A/SMC4/ZNF207/CHMP2A/NUP160/KIF2C/CCNB1/WAPL/SMC3/N…	170
GO:0032535	regulation of cellular component size	biological process	229/9065	325/17381	8.90638e-12	1.66688e-09	1.19981e-09	1.35101	NTRK3/WNT3A/RAB21/PAK1/GRB2/RARG/PICALM/NRP1/LRRC8A/IQGAP3/TMSB4X/CLCN3/PLEKHG2/SHTN1/PREX1/BDNF/AKT3/VEGFA/PRKCE/FN1/P2RX7/TWF1/EDN1/TWF2/SRF/CREB1/MSN/ILK/RB1CC1/RAB5A/DNM2/BMPR2/AKT1/PFN1/RHOA/CXCL12/CDK4/VAV3/HSP90AB1/PEX11B/VASP/CDC42EP4/ABI2/SPIRE1/NDEL1/LIMA1/CAPZB/PPP1R9A/SPART/RNF6/RAB11A/WNT5A/SPP1/CAPZA1/ARPC5/DMTN/F2RL1/PLXNA4/CDH4/PLS1/CTTN/CAPG/TMOD3/PLEKHH2/IST1/KCNN4/SEMA4D/HP1BP3…	229
GO:0006260	DNA replication	biological process	208/9065	291/17381	9.33961e-12	1.67358e-09	1.20463e-09	1.37049	CDC25A/CDC42/CDK9/CHEK1/JUN/PRIM1/CCNE1/CCNE2/SET/POLA2/EHMT2/EGFR/IGF1/BRCA2/BRCA1/ATM/FGFR1/RAD51/FBXW7/PRIMPOL/NFIA/NFIX/IGF1R/TSPYL2/HRAS/PDGFRA/SIRT1/GMNN/HMGA1/PURA/RBBP7/RFC5/RRM2/POLA1/BARD1/ORC6/FAM111A/DONSON/EXO1/MCM3/MCM10/RFC4/DUT/CHAF1B/GINS2/POLQ/ZNF365/RECQL4/POLD1/CDK1/PTMS/CHTF18/PCLAF/DSCC1/FANCM/POLE/TICRR/MCM5/MCM7/CDC6/PCNA/CDT1/MCM8/POLE2/GINS3/NF2/BLM/FEN1/MCM6/MCM4/IL6/RP…	208
GO:0016579	protein deubiquitination	biological process	208/9065	291/17381	9.33961e-12	1.67358e-09	1.20463e-09	1.37049	CDC25A/ESR1/TRAF6/BAP1/ASXL2/RHOT1/BRCA1/EP300/CCNA2/CYLD/HGS/TP53/HIF1A/SMAD4/OTUB1/NFKBIA/SHMT2/MDM2/SMAD2/RHOA/CFTR/TGFBR1/CCP110/BARD1/CDC20/CDK1/NLRP3/USP39/PSMD9/OTUD4/FOXK1/USP33/KAT2A/NOP53/PSME1/GATA3/RIPK2/ACTB/USP24/AXIN1/MYC/UBA52/TRRAP/PSMD3/UBB/STAM2/USP12/PSMB2/TNKS/USP21/PSMD4/PSMD11/ADRM1/USP10/RAD23A/USP5/USP36/PSMC1/USP46/OTUD1/USP31/KEAP1/PSMB3/PSMA7/PARK7/BRCC3/MCRS1/SMAD3/PS…	208
GO:0031647	regulation of protein stability	biological process	181/9065	248/17381	1.13573e-11	1.99273e-09	1.43436e-09	1.39937	NLK/KRAS/CDC42/CDKN1A/BCL2/CREBL2/HSPA1A/PPIB/GOLGA7/IGF1/HPS4/EP300/FBXW7/HSPD1/CREBBP/SIAH1/CREB1/SIRT1/MAPK1/PFN1/MDM2/TAF9/HSP90AB1/TERT/PRNP/CDC37/NF2/BTRC/CCT3/SOX4/EPHA4/RASSF2/FBXL3/USP33/FLOT2/CCDC88C/CALR/HIST1H1B/KAT2A/NOP53/FLNA/PDCD10/ZNF207/TRIM24/TELO2/SRC/HSP90AA1/CCAR2/ATP1B3/BAG6/SREBF1/PTGES3/HSPA1B/DVL1/XBP1/RAD23A/HSPA8/CCT5/GAPDH/CDC37L1/P3H1/GTPBP4/PLK1/PPARGC1A/NPM1/HTT/CC…	181
GO:0070997	neuron death	biological process	223/9065	316/17381	1.31063e-11	2.23512e-09	1.60883e-09	1.35308	MEF2C/WNT3A/MYB/KRAS/CDC42/AKT2/FADD/FOXO3/HDAC4/BCL2/JUN/MCL1/MSH2/ROCK1/SOD1/SOD2/SET/LRP1/PICALM/NRP1/FGF20/CASP9/PITX3/TRIM2/AXL/BDNF/G6PD/ATM/ERBB3/FBXW7/MECP2/APP/MEOX2/SIGMAR1/HMOX1/PPARA/NF1/FAS/HRAS/TP53/MAP3K11/SIAH1/HIF1A/CREB1/SIRT1/BCL2L11/NTRK2/RB1/TLR4/ILK/EGLN2/TP73/STAT3/TBK1/FOS/NTF3/AKT1/LRRK2/CEBPB/BAX/DLX1/AIMP2/HYOU1/HSP90AB1/TERT/PRNP/TNFRSF21/MAX/SIX1/IL6/SIX4/EGLN3/ADARB1…	223
GO:0016050	vesicle organization	biological process	265/9065	385/17381	1.32695e-11	2.23512e-09	1.60883e-09	1.31975	AKT2/ANXA1/ZEB2/BCL2/GOLPH3L/PDCD6IP/SNX6/SEC23IP/PICALM/CTSC/AP3D1/AP3B1/ANXA2/SNX19/CLCN3/TRAPPC3/SDC4/RABGAP1L/HPS4/USO1/SNX1/P2RX7/HGS/SNAPIN/UVRAG/CREB1/SDC1/VAPA/VAV3/FAM109B/SEC31A/TBC1D1/GBF1/VAMP8/FBXO5/TMED2/SEC23A/SNX12/RAB5B/RAB34/RAB1B/TMEM127/ANKFY1/PPP6R3/TSG101/CD2AP/TRAPPC10/AP1G1/ZNF385A/RAB11A/SYT12/SAMD9L/GOLPH3/KIF5B/CALR/SYTL2/HOOK1/TRIM9/AP1M1/CHMP2A/GNAI3/MYO18A/IST1/FOLR1…	265
GO:0034976	response to endoplasmic reticulum stress	biological process	197/9065	274/17381	1.3909e-11	2.29689e-09	1.65329e-09	1.37855	CCND1/ATF6/BCL2/HSPA1A/JUN/THBS1/SERP1/ITPR1/EP300/HSP90B1/PIK3R2/AGR2/ATF6B/CXCL8/TSPYL2/TMX1/TP53/SIRT1/BCL2L11/IFNG/PMAIP1/LRRK2/CEBPB/CREBRF/BAX/HYOU1/SEC31A/CTDSP2/PARP16/SESN2/SEC61A1/TMEM33/FAM129A/PPP1R15B/SERINC3/SHC1/TARDBP/SEC61B/CALR/UGGT2/ACADVL/SEC62/PDIA3/MAN1B1/DNAJC10/PTPN1/UGGT1/UBAC2/CCL2/SSR1/CCDC47/CAV1/PDIA6/TMUB1/RNF103/TLN1/BAG6/EIF2B5/UFC1/RACK1/DDX11/GSK3A/ERP29/FOXRED2/…	197
GO:1901652	response to peptide	biological process	320/9065	477/17381	1.47756e-11	2.39307e-09	1.72252e-09	1.28629	UCP2/AKT2/TLR2/FOXO3/ANXA1/RNASEL/CCND3/PAK1/FOXO1/LRP1/GRB2/ATP6V0A1/PKM/IGF1/GJA1/ADCY6/CRK/KLF4/EGR2/INPPL1/ATP6V1B2/PIK3R2/APP/CSK/PTK2/CCNA2/KLF10/PRKAR2A/COL1A1/IRS1/NFKB1/IGF1R/CDKN1B/PPARA/EDN1/JAG1/IGF2/TP53/ACVR1C/BMP7/PPARG/MAPK3/CREB1/SIRT1/MAPK1/ERRFI1/TLR4/IGFBP5/SLC2A4/NFKBIA/PTGS2/TEK/NOTCH1/CTGF/STAT3/AKT1/FABP3/MDM2/CXCL12/CDK4/ADCY9/GJB2/TGFBR3/PRNP/SESN2/MAX/CDC6/IL6/EPHA4/HHE…	320
GO:1901653	cellular response to peptide	biological process	240/9065	345/17381	2.31238e-11	3.6745e-09	2.64488e-09	1.33383	UCP2/AKT2/FOXO3/RNASEL/CCND3/PAK1/FOXO1/LRP1/GRB2/ATP6V0A1/PKM/IGF1/ADCY6/CRK/KLF4/ATP6V1B2/PIK3R2/APP/CSK/PTK2/CCNA2/KLF10/PRKAR2A/IRS1/NFKB1/IGF1R/EDN1/IGF2/TP53/PPARG/MAPK3/CREB1/SIRT1/MAPK1/ERRFI1/TLR4/SLC2A4/STAT3/AKT1/MDM2/CDK4/ADCY9/GJB2/PRNP/MAX/CDC6/IL6/EPHA4/NDEL1/PRKAA1/ATP6V1C1/PDE3B/KLF11/GRB10/SHC1/CACNB1/RAB31/FBN1/GSTP1/GNG5/AGTRAP/RAP1B/CACNA2D1/TSHR/ATP6V1A/SMARCC1/GNRHR/GNB2/PT…	240
GO:0043434	response to peptide hormone	biological process	279/9065	410/17381	2.8188e-11	4.39629e-09	3.16442e-09	1.30475	UCP2/AKT2/TLR2/ANXA1/RNASEL/CCND3/PAK1/FOXO1/GRB2/ATP6V0A1/PKM/GJA1/ADCY6/CRK/EGR2/INPPL1/ATP6V1B2/PIK3R2/CSK/PTK2/CCNA2/PRKAR2A/COL1A1/IRS1/NFKB1/IGF1R/CDKN1B/PPARA/EDN1/IGF2/ACVR1C/BMP7/PPARG/MAPK3/CREB1/SIRT1/MAPK1/ERRFI1/IGFBP5/SLC2A4/PTGS2/TEK/CTGF/STAT3/AKT1/FABP3/MDM2/CXCL12/CDK4/ADCY9/GJB2/TGFBR3/SESN2/MAX/CDC6/IL6/HHEX/NDEL1/PRKAA1/ATP6V1C1/PDE3B/GRB10/SHC1/GNAI1/SRSF6/STAT1/RAB31/FBN1/G…	279
GO:0140014	mitotic nuclear division	biological process	183/9065	253/17381	3.17199e-11	4.85719e-09	3.49617e-09	1.38688	CDC42/CDC14A/CHEK1/KIF23/ANLN/CDC14B/HSPA1A/TTK/IGF1/ATM/CCSAP/KIF2A/CDKN1C/PRMT5/CDKN1B/HNRNPU/EDN1/KIF22/IGF2/BMP7/RB1/CDK13/RHOA/NSL1/NIPBL/SGO1/HASPIN/UBE2C/KNTC1/RACGAP1/PSRC1/PKMYT1/TRIP13/NDC80/DSN1/NCAPG/KIF11/CDC20/BUB1B/NCAPH/DSCC1/CDCA5/NCAPD2/CDC6/FBXO5/RCC1/BORA/CDT1/TACC3/ZWINT/ESPL1/NDEL1/POGZ/TOM1L2/NUP62/RAB11A/CHAMP1/BTC/DYNC1LI1/MKI67/MAD2L1/NCAPD3/FLNA/CENPF/KIF4A/SMC4/ZNF207/…	183
GO:0007059	chromosome segregation	biological process	240/9065	346/17381	3.66804e-11	5.39205e-09	3.88117e-09	1.32997	CDC42/CDC14A/KIF23/CDC14B/RAD51C/CCNE1/CCNE2/TTK/BRCA1/ATM/FBXW7/KIF2A/UBE2I/HNRNPU/KIF22/UVRAG/RB1/MAPRE1/CSNK2A1/NSL1/NDC1/DDX3X/NIPBL/SGO1/OIP5/HASPIN/XPO1/CENPU/UBE2C/KNTC1/RACGAP1/PSRC1/TRIP13/NDC80/DSN1/ECT2/NCAPG/SKA1/KIF11/CDC20/BUB1B/NCAPH/CENPQ/CDCA2/DSCC1/TOP2A/FANCM/CDCA5/NCAPD2/CDC6/RCC1/CDT1/SPC25/TACC3/ZWINT/FANCD2/ESPL1/FEN1/ARL8A/DYNLL2/NDEL1/NR3C1/POGZ/CLIP1/CKAP5/TEX15/NUP62/RA…	240
GO:0001933	negative regulation of protein phosphorylation	biological process	287/9065	424/17381	3.68478e-11	5.39205e-09	3.88117e-09	1.29785	NTRK3/SPRED1/CEBPA/CDKN1A/PDCD4/JUN/RGS3/FOXO1/SNX6/PWP1/CORO1C/PREX1/INPP5F/TIMP3/ADAR/KLF4/MAPK7/PIK3R2/CSK/PRKAR2A/CDKN1C/LIF/P2RX7/IGF1R/CALM3/CDKN1B/NF1/BMP7/CALM2/FABP4/SMAD4/SIRT1/CDKN2A/RB1/ERRFI1/TLR4/ILK/TP73/PAX6/TRIB2/NTF3/AKT1/LRRK2/BAX/GADD45A/CTDSP2/PRNP/WWTR1/NF2/HMGCR/IL6/SMCR8/FAM129A/HHEX/ADARB1/DUSP8/PPP1R15B/SOCS4/TSG101/SH3BP5/RASSF2/NUP62/SPRED2/TARDBP/PTPRR/PPP1R1C/GSTP1/S…	287
GO:0050769	positive regulation of neurogenesis	biological process	281/9065	414/17381	3.71336e-11	5.39205e-09	3.88117e-09	1.30141	CXCR4/NTRK3/MEF2C/HES1/WNT3A/MYB/TGIF2/TLR2/PLAG1/ZEB2/RAB21/BCL2/DNMT3B/PAK1/NRP1/FGF20/ZEB1/SHTN1/MMD/BDNF/MAP2K1/FGFR1/VEGFA/EZH2/CPNE6/APP/FN1/DPYSL3/LIF/PRMT5/ARHGDIA/CSF1/TWF2/DICER1/BMP7/HIF1A/PPARG/SRF/NTRK2/ILK/TIMP2/TP73/IFNG/NOTCH1/PAX6/RAP1A/BMPR2/LPAR1/RHOA/CXCL12/NIPBL/DLX1/PLXNC1/ECT2/ZNF365/ITPKA/ASPM/SPEN/IL6/EPHA4/NDEL1/LRP8/STK11/VLDLR/PPP1R9A/TCF4/PTPRD/RAB11A/WNT5A/KIT/ABL2/R…	281
GO:2001233	regulation of apoptotic signaling pathway	biological process	262/9065	383/17381	4.82763e-11	6.89124e-09	4.96028e-09	1.31162	ACVR1/S100A9/TP53INP1/E2F1/FADD/BCL2/HSPA1A/MCL1/SOD1/SOD2/BCL2L2/YWHAQ/THBS1/NRP1/CTSC/IGF1/BRCA1/TIMP3/FGFR1/FAF1/MAPK7/FBXW7/CYLD/PEA15/HMOX1/NF1/FAS/TP53/SIAH1/HIF1A/SERPINE1/SIRT1/BCL2L11/BBC3/PTGS2/CD44/TP73/YWHAZ/PMAIP1/RB1CC1/AKT1/LRRK2/SNAI2/MDM2/TGFBR1/CXCL12/MAPK8/TAF9/DDX3X/BAX/STRADB/HYOU1/TERT/TMC8/NACC2/DYNLL2/SERINC3/SGMS1/YWHAH/ZNF385A/PRELID1/GSTP1/BAG5/ITGA6/PDIA3/CTTN/NOC2L/PT…	262
GO:0043405	regulation of MAP kinase activity	biological process	234/9065	337/17381	5.4829e-11	7.69616e-09	5.53965e-09	1.33135	CXCR4/NTRK3/IRAK2/KRAS/SPRED1/TRAF6/IRAK1/ZEB2/PDCD4/RGS3/PAK1/SOD1/MAP3K8/THBS1/HACD3/IQGAP3/EGFR/IGF1/CRK/MAP2K1/FGFR1/VEGFA/MAPK7/EZH2/CSK/FGF2/P2RX7/IGF1R/PEA15/DVL2/HGS/EDN1/CD40LG/NF1/HRAS/ERBB2/MAP3K11/BMP7/CRKL/MAPK3/MAPK1/FLT1/TLR4/ILK/PIK3CG/TP73/RAP1A/TRIB2/FLT3/NTF3/LRRK2/ADAM9/LPAR1/TGFBR1/GADD45A/CDK1/C1QTNF2/C5/HMGCR/EPHA4/DUSP8/PRKAA1/TSG101/SHC1/NUP62/WNT5A/MAP3K21/FRS2/KIT/SPRED…	234
GO:0051493	regulation of cytoskeleton organization	biological process	306/9065	457/17381	5.78108e-11	7.98168e-09	5.74517e-09	1.28384	NTRK3/MEF2C/STMN1/MET/S100A9/WNT3A/CDC42/PLK2/CCNF/CHEK1/CENPJ/HSPA1A/PDCD6IP/ROCK1/PAK1/LRP1/GRB2/TPM1/NRP1/TMSB4X/SH3PXD2B/BRCA1/PLEKHG2/PREX1/SDC4/CRK/TAC1/FSCN1/PRKCE/CCSAP/MECP2/PTK2/ALMS1/CYLD/P2RX7/ARHGDIA/CDKN1B/TWF1/HNRNPU/EDN1/TWF2/HRAS/SMAD4/MAPK3/PDGFRA/MAPK1/ILK/TEK/CTGF/MAPRE1/NTF3/PFN1/WASF2/LPAR1/RHOA/TGFBR1/CXCL12/RASSF1/XPO1/PSRC1/SKA1/KIF11/VASP/CDC42EP4/PFDN2/ABI2/BORA/CLIC4/T…	306
GO:1902275	regulation of chromatin organization	biological process	122/9065	158/17381	5.90736e-11	8.02448e-09	5.77597e-09	1.4805	DNMT1/MYB/CDK9/CHEK1/DNMT3B/SET/UHRF1/BRCA1/ATM/VEGFA/MECP2/PRKD2/LIF/RPS6KA5/HNRNPU/IGF2/TP53/SPI1/SMAD4/MAPK3/BRD7/SIRT1/OTUB1/HMGA1/LRRK2/SNAI2/MAPK8/NIPBL/PHF19/ASF1A/JARID2/SIN3A/HIST1H1B/PAXBP1/MKI67/KAT2A/SMARCB1/MYOCD/NOC2L/GATA3/CTBP1/UBR5/MIER1/CCNB1/KMT2A/SETD1A/SKI/SREBF1/WBP2/TRIM28/PHF8/UBE2N/CTNNB1/TGFB1/NELFE/CDC45/ATRX/PPARGC1A/PARP10/RIF1/BCOR/KDM3A/AKAP8/ATAD2/IWS1/TRIP12/CHTOP…	122
GO:0051098	regulation of binding	biological process	235/9065	339/17381	6.44871e-11	8.62079e-09	6.2052e-09	1.32915	MEF2C/STMN1/MET/HES1/WNT3A/CDC42/PLK2/CDK9/E2F1/HDAC4/TRAF6/BCL2/JUN/ROCK1/LRP1/PTPRF/NRP1/ANXA2/HAND2/IGF1/TMSB4X/BDNF/CRK/KLF4/EP300/HMGA2/APP/CYLD/LIF/CALM3/HMOX1/PPARA/SNAPIN/CALM2/PPARG/SMAD4/MAPK3/GMNN/RB1/NFKBIA/IFNG/MAPRE1/LRRK2/SMAD2/TGFBR1/MAPK8/BAX/HMGB1/PHLDA2/LEF1/HSP90AB1/TERT/NMD3/TGFBR3/CDCA5/TMC8/CDT1/RSF1/EPHA4/MAPRE3/HABP4/RAN/WNT5A/CSNK1A1/IFIT1/SLPI/SIN3A/USP33/DKK1/RALB/KAT2…	235
GO:0010506	regulation of autophagy	biological process	211/9065	300/17381	7.63001e-11	9.999e-09	7.19722e-09	1.34855	MET/TP53INP1/PLK2/GATA4/BCL2/MCL1/FOXO1/SNX6/ATP6V0A1/OSBPL7/ATM/ITPR1/ATP6V1B2/EP300/WDR6/FBXW7/PIK3R2/HMOX1/HIF1A/MAPK3/UVRAG/HK2/SIRT1/KDR/MTDH/IFNG/TBK1/RB1CC1/RAB5A/AKT1/LRRK2/MAPK8/HMGB1/PIP4K2C/SESN2/CDC37/SMCR8/RAB1B/PRKAA1/ATP6V1C1/STK11/RNF41/RAB12/FYCO1/PSAP/PIP4K2B/TRIM22/ABL2/USP33/CAPN1/RALB/KAT2A/ATP6V1A/EIF4G1/PRKAG1/CTTN/MFN2/PTPN22/GNAI3/ATP6V1E1/RAB39B/RIPK2/CSNK2A2/ATG7/VDAC1/…	211
GO:0090068	positive regulation of cell cycle process	biological process	195/9065	274/17381	7.71711e-11	9.999e-09	7.19722e-09	1.36455	GATA6/CDC25A/CCND2/CDC42/PLK2/CCND1/CDKN1A/E2F1/KIF23/ANXA1/CENPJ/RAD51C/IGF1/BRCA1/ATM/FGFR1/MED1/EP300/PRKCE/HMGA2/CNOT6/MECP2/APP/CDK10/CDKN1B/HNRNPU/EDN1/IGF2/TP53/RB1/TP73/CTGF/MDM2/RHOA/DDX3X/CDK4/BAX/GADD45A/UBE2C/RACGAP1/NDC80/ECT2/TERT/CDK1/CDCA5/CDC6/PCNA/CDT1/ESPL1/FEN1/SOX4/TNKS1BP1/CNOT4/ZNF385A/NUP62/RAB11A/WNT5A/CUL4B/RCC2/SIN3A/BTC/DYNC1LI1/MAD2L1/EIF4G1/TMOD3/ANKRD17/SFN/CCNB1/CD…	195
GO:0000209	protein polyubiquitination	biological process	206/9065	292/17381	8.23109e-11	1.05034e-08	7.56027e-09	1.35267	CCNF/TRAF6/BCL2/HACE1/HERC6/BRCA1/RNF138/ANKIB1/FBXW7/KLHL42/RNF213/SIAH1/OTUB1/XIAP/BARD1/UBE2C/RUSC1/BTRC/PELI2/THOP1/PSMD9/FBXL5/RNF145/RNF41/CBFB/KLHL20/RNF6/FBXL3/RNF111/NMI/KLHL3/LNPEP/PTPN22/PSME1/HERC5/UBR5/UBA52/PSMD3/UBB/PSMB2/UBE2O/TNKS/MGRN1/ANAPC1/UBE2A/FBXL19/UBE2N/PSMD4/FZR1/PSMD11/RNF216/SKP1/PSMC1/TTC3/DZIP3/HUWE1/PARP10/FBXO11/TRIM27/MKRN1/FBXO31/FBXO21/UBE2Q2/RNF168/PSMB3/PSMA7…	206
GO:0051090	regulation of DNA binding transcription factor activity	biological process	266/9065	391/17381	8.52186e-11	1.07121e-08	7.71051e-09	1.3044	S100A9/WNT3A/IRAK2/KRAS/TLR2/HDAC4/ESR1/TRAF6/IRAK1/CARD8/HSPA1A/JUN/HAND2/TMSB4X/SUFU/KLF4/VEGFA/EP300/EZH2/IKBKB/APP/PRKD2/CYLD/PIM1/NFKB1/RPS6KA5/DVL2/HMOX1/UBE2I/CLOCK/EDN1/CD40LG/CHUK/BMP7/PPARG/SRF/RNF2/MAPK3/PTCH1/SIRT1/CDKN2A/MAPK1/RB1/TLR4/NFKBIA/MTDH/FOS/AKT1/MAPK8/CREBZF/FANCA/PRDX3/NFKB2/PRNP/NLRP3/FANCD2/BTRC/IL6/LRP8/TAX1BP1/RNF41/ERBIN/WNT5A/KIT/ITGB2/TRIM22/SGK3/JUP/TRIM26/HDAC2/F…	266
GO:2000027	regulation of organ morphogenesis	biological process	180/9065	250/17381	8.66315e-11	1.07296e-08	7.72307e-09	1.38051	HES1/ACVR1/WNT3A/CDC42/ESR1/BCL2/WT1/HAND2/FGFR1/MED1/VEGFA/FBXW7/HPN/HOXB7/PIM1/LIF/CSF1/WNT9B/DVL2/EDN1/BMP7/FGF7/SMAD4/SOX9/GPC4/TGFBR2/IFNG/NOTCH1/BMPR2/PFN1/SNAI2/RUNX2/RHOA/TGFBR1/BAX/BASP1/SIX1/SULF2/SIX4/NFIB/PSMD9/SRSF6/WNT5A/FRS2/STAT1/FGFR2/AP2S1/GNG5/DKK1/B4GALT1/CLTC/PSME1/GATA3/LGR4/HOXC11/MYC/UBA52/PSMD3/UBB/MAGED1/AP2B1/PSMB2/AP2A2/TIAM1/TBX1/DVL1/PSMD4/CTNNB1/TGFB1/TBX2/PSMD11/XB…	180
GO:1903311	regulation of mRNA metabolic process	biological process	196/9065	276/17381	9.3792e-11	1.14481e-08	8.24024e-09	1.36161	CDK9/E2F1/HSPA1A/RNASEL/TIA1/SET/PTBP1/DDX5/HNRNPD/RBM4/SRSF9/HNRNPU/TRA2B/YWHAZ/RBFOX2/AKT1/SRSF7/ZFP36L2/BARD1/HNRNPL/XPO1/RBM8A/PSMD9/SON/PAPOLA/SRSF2/SRSF3/SRSF6/SLTM/TARDBP/YTHDC1/RBM42/SRSF4/SREK1/PDE12/EIF4G1/ANP32A/YTHDF2/PSME1/HNRNPA1/CCNB1/DYRK1A/IGF2BP3/CPEB3/IGF2BP1/YBX1/SNRPA/RBM5/DHX34/UBA52/PSMD3/UBB/PAIP1/TNRC6B/PSMB2/LARP1/SECISBP2/MTOR/HNRNPC/SAMD4B/SF3A1/MEX3D/CNOT1/DDX17/PSMD4…	196
GO:0016331	morphogenesis of embryonic epithelium	biological process	115/9065	148/17381	1.02837e-10	1.23727e-08	8.90582e-09	1.48985	TRAF6/ZEB2/RARG/ARID1A/SUFU/SDC4/IFT52/WNT9B/DVL2/BMP7/HIF1A/SOX9/PTCH1/SCRIB/PFN1/VASP/SIX1/MTHFD1/TMED2/SOX4/HHEX/SIX4/LUZP1/WNT5A/DLC1/FGFR2/KAT2A/GLI2/FOLR1/GATA3/KDM2B/PLXNB2/GLMN/RDH10/HAND1/MTHFD1L/SKI/PRKACA/DVL1/TSC2/CTNNB1/TGFB1/ALDH1A2/TEAD2/TSC1/MIB1/PTK7/SEMA4C/CFL1/TCTN1/GRSF1/ABL1/SEC24B/RALA/GDF7/LRP2/MED12/SFRP1/STK3/SETD2/NODAL/AR/VANGL2/FZD6/STK4/SOX11/TRIM71/PRICKLE1/NOG/WNT2B…	115
GO:0034330	cell junction organization	biological process	189/9065	265/17381	1.11972e-10	1.32821e-08	9.56035e-09	1.36749	KRT5/CDC42/BCL2/PDCD6IP/ROCK1/THBS1/NRP1/ITGB4/CORO1C/GJA1/SDC4/LAMC2/VEGFA/FSCN1/IKBKB/CADM1/FN1/CSK/PTK2/TJP1/FERMT2/SRF/EPB41L3/KDR/ILK/MTDH/TEK/RAP1A/LAMC1/PTPRK/SNAI2/RHOA/TGFBR1/LIMS1/GJB2/ACTN1/ECT2/VASP/CDH1/NF2/RASSF8/MPP5/HEG1/CBFB/DLC1/CAPZA1/RCC2/UGT8/PARD6B/DMTN/RAP1B/ITGA6/JUP/F2RL1/VMP1/CDH4/ACTN4/DSG2/FLNA/PHLDB2/RAPGEF2/RHOC/CTTN/TBCD/CDH13/F11R/ACTB/THY1/CDH2/FLNC/SRC/CAV1/VCL/Z…	189
GO:1901796	regulation of signal transduction by p53 class mediator	biological process	133/9065	176/17381	1.18416e-10	1.38472e-08	9.96716e-09	1.44893	TP53INP1/SPRED1/CHEK1/EHMT2/EHMT1/BRCA1/DDX5/ATM/EP300/TAF4B/PHF20/PRMT5/MTA2/TP53/BRD7/SIRT1/HDAC1/CD44/TP73/PMAIP1/AKT1/CSNK2A1/SNAI2/MDM2/TAF9/RBBP7/RFC5/BARD1/EXO1/RFC4/KMT5A/CHD4/BLM/RPA2/PRKAA1/STK11/SMYD2/ZNF385A/NUAK1/SPRED2/MRE11/NOP53/HDAC2/PRKAG1/RFC2/NOC2L/TRIM24/CSNK2A2/DYRK1A/RAD9A/UBA52/UBB/HIPK2/NOP2/BCL2L12/CHD5/MIF/JMY/PPP1R13B/NPM1/TAF12/SSRP1/KAT6A/RPL26/TAF9B/TPX2/RMI1/UBC/HE…	133
GO:0022604	regulation of cell morphogenesis	biological process	290/9065	432/17381	1.20025e-10	1.38472e-08	9.96716e-09	1.28713	NTRK3/WNT3A/CDC42/ANXA1/ZEB2/RAB21/PAK1/TPM1/NRP1/F2/CORO1C/SHTN1/PREX1/ARHGEF18/UST/BDNF/CRK/MAP2K1/VEGFA/LARP4/CPNE6/FN1/PTK2/LRP4/HPN/WASF3/ARHGDIA/FERMT2/TWF2/SRF/CRKL/EPB41L3/MSN/NTRK2/KDR/ILK/CD44/DNM2/BMPR2/LRRK2/PDPN/LPAR1/RHOA/CXCL12/LIMS1/PLXNC1/CDC42EP4/ITPKA/PDZD8/IL6/EPHA4/BRWD1/NDEL1/LRP8/CSNK1G1/STK11/CAPZB/PPP1R9A/SPART/PTPRD/SEPT7/RNF6/YWHAH/RAB11A/WNT5A/KIT/CSNK1A1/DLC1/ITGB2/SP…	290
GO:0016049	cell growth	biological process	322/9065	486/17381	1.21935e-10	1.38775e-08	9.98898e-09	1.27036	NTRK3/S100A9/WNT3A/CDC42/GATA4/CDKN1A/ZEB2/BAP1/RAB21/BCL2/WT1/H3F3B/HSPA1A/PAK1/RARG/NRP1/F2/EGFR/CYR61/IGF1/GJA1/SHTN1/DDX5/BDNF/G6PD/VEGFA/CPNE6/HNF4A/IP6K2/APP/FN1/DCBLD2/HPN/DDR1/TSPYL2/CDKN1B/EDN1/TWF2/TP53/ERBB2/PPARG/SRF/SMAD4/SOX9/SIRT1/CDKN2A/EPB41L3/RB1/IGFBP2/IGFBP5/SMARCA2/ILK/FBLN5/EGLN2/TGFBR2/CTGF/DNM2/BMPR2/AKT1/CSNK2A1/TGFBR1/CXCL12/TAF9/DDX3X/RBBP7/CLSTN1/PSRC1/LEF1/SESN2/TMC8/…	322
GO:1901214	regulation of neuron death	biological process	198/9065	280/17381	1.37284e-10	1.53026e-08	1.10147e-08	1.35586	MEF2C/WNT3A/MYB/KRAS/CDC42/FOXO3/HDAC4/BCL2/JUN/MCL1/MSH2/ROCK1/SOD1/SOD2/SET/LRP1/PICALM/NRP1/FGF20/CASP9/PITX3/TRIM2/AXL/BDNF/G6PD/ATM/ERBB3/FBXW7/MECP2/SIGMAR1/HMOX1/PPARA/NF1/HRAS/TP53/MAP3K11/HIF1A/CREB1/SIRT1/BCL2L11/NTRK2/TLR4/ILK/EGLN2/TP73/STAT3/TBK1/FOS/NTF3/AKT1/LRRK2/CEBPB/BAX/DLX1/AIMP2/HYOU1/HSP90AB1/TERT/PRNP/SIX1/IL6/SIX4/EGLN3/BTBD10/ELK1/DKK1/EIF4G1/ITGA1/GATA3/KDM2B/CCL2/NR4A3/…	198
GO:0006613	cotranslational protein targeting to membrane	biological process	80/9065	96/17381	1.3809e-10	1.53026e-08	1.10147e-08	1.59781	SEC61A1/ARL6IP1/SEC61B/SEC62/SSR1/RPS8/RPS2/SRP68/UBA52/RPL36A/RPL29/RPL18A/RPL3/RPS6/RPL4/RPLP1/RPS14/RPL7A/RPL10/RPL18/RPL37/RPL13/RPS27/RPL8/RPS15A/RPS5/RPL10A/SRP9/RPS18/RPS10/SRPRA/RPS3A/RPS28/RPLP0/RPS4X/RPL9/RPL23A/RPL27A/RPS3/RPL26/RPL12/RPL22/SSR2/RPL31/RPL35A/RPS9/RPL34/RPS12/RPL15/RPL36/RPS21/RPL5/RPL32/RPS26/RPL14/RPS7/RPL27/RPS17/RPL13A/SEC63/RPS15/RPS24/RPL41/RPS19/TRAM1/RPL30/SRP14…	80
GO:1903829	positive regulation of cellular protein localization	biological process	273/9065	404/17381	1.45877e-10	1.5952e-08	1.14822e-08	1.29565	HES1/WNT3A/CDC42/AKT2/TLR2/E2F1/BAP1/BCL2/PPM1A/PAK1/LRP1/YWHAQ/F2/EGFR/ANP32B/IGF1/HPS4/RAB11FIP2/MED1/PRKCE/FBXW7/PIK3R2/APP/AGR2/LRP4/CYLD/LIF/TP53/ERBB2/ERBB4/SMAD4/BCL2L11/MAPK1/MSN/TLR4/PTGS2/TP73/IFNG/YWHAZ/PMAIP1/AKT1/LRRK2/MDM2/RHOA/TGFBR1/MAPK8/PCNT/STARD7/HHAT/NDC80/ECT2/HSP90AB1/TERT/EPHA2/NMD3/PRNP/SESN2/FAM20B/CDK1/CENPQ/CDH1/SULF2/CDT1/RAC2/CCT3/IL6/DYNLL2/STK11/TSG101/CD2AP/GNAI1/…	273
GO:0006413	translational initiation	biological process	143/9065	192/17381	1.47739e-10	1.5952e-08	1.14822e-08	1.42804	UHMK1/RBM4/EIF3K/POLR2D/DDX3X/EIF3I/EIF4B/TICRR/PPP1R15B/GLE1/HABP4/EIF4G1/EIF4E/YTHDF2/DDX1/RPS8/RPS2/EIF3C/UBA52/RPL36A/RPL29/EIF4EBP2/EIF2B5/PAIP1/RPL18A/PPP1CA/LARP1/RPL3/RPS6/RPL4/RPLP1/RPS14/RPL7A/RPL10/EIF4A2/RPL18/RPL37/EIF4A1/RPL13/EIF3M/PABPC1/EIF2B2/RPS27/RPL8/RPS15A/RPS5/EIF3D/RPL10A/EIF4G2/NCBP2/NPM1/RPS18/RPS10/RPS3A/RPS28/RPLP0/RPS4X/EIF2AK1/EIF3A/EIF1/RPL9/RPL23A/RPL27A/RPS3/RPL26…	143
GO:0048193	Golgi vesicle transport	biological process	232/9065	336/17381	1.55545e-10	1.65823e-08	1.19358e-08	1.3239	KIF23/ACTR1A/GOLGA5/GOLPH3L/SEC23IP/F2/GOLGA7/GAK/CTSC/ARF3/ARCN1/TRAPPC3/ARF4/USO1/KIF2A/CSK/CHIC2/KLC1/SNX1/GOLGB1/MON2/KIF22/UVRAG/TEX261/TMED7/DNM2/VAPA/HYOU1/RACGAP1/SEC31A/KIF11/SURF4/PITPNB/GBF1/VAMP8/TMED2/KIF15/SEC23A/RAB14/GAS1/GOPC/RAB34/DYNLL2/RAB1B/ANKFY1/PPP6R3/SEC23B/ARL1/CAPZB/SCAMP2/IER3IP1/KLHL20/TRAPPC10/AP1G1/RAB6A/BGLAP/RAB31/CAPZA1/GOLPH3/MYO1B/KDELR1/DYNC1LI1/EXOC2/COPG1/BC…	232
GO:0048863	stem cell differentiation	biological process	186/9065	261/17381	1.75011e-10	1.84243e-08	1.32617e-08	1.3664	MEF2C/LMO2/HES1/ACVR1/GATA6/WNT3A/MYB/GATA4/ESR1/ZEB2/H3F3B/CDK6/PWP1/NRP1/CORO1C/HAND2/HIST1H3B/HOXA7/SOX6/HMGA2/LIF/HNRNPU/EDN1/JAG1/ERBB4/BMP7/HIF1A/SPI1/SRF/SMAD4/SOX9/MAPK3/PDGFRA/MAPK1/TP73/NOTCH1/STAT3/CDK13/SNAI2/RUNX2/EDNRA/ZFP36L2/LEF1/HHEX/PSMD9/CBFB/JARID2/KIT/SOX5/FGFR2/HIST2H3A/YTHDF2/MYOCD/HIST2H3D/PSME1/HIST2H3C/FOLR1/GATA3/RDH10/KMT2A/UBA52/SETD1A/PSMD3/PEF1/UBB/HIST1H3D/PSMB2/CD…	186
GO:0007030	Golgi organization	biological process	88/9065	108/17381	1.8006e-10	1.87218e-08	1.34758e-08	1.56231	CDC42/GOLGA5/GOLPH3L/HACE1/SYNE1/SEC23IP/GAK/MAP2K1/USO1/GOLGB1/GORASP2/PRMT5/MAPK3/MAPK1/YWHAZ/DNM2/LRRK2/SURF4/CDK1/GBF1/TMED2/UBXN2A/ARL1/ATL2/CSNK1A1/ATL3/BAG5/GOLPH3/VMP1/PDCD10/RAB30/MYO18A/RAB29/PLEKHM2/TJAP1/TRAPPC12/STX16/ARFGEF1/HTT/CIT/GCC2/VCPIP1/TMED9/ATP8B2/DYNC2H1/STK25/CAMSAP3/COG2/VPS51/COG3/PI4K2B/USP6NL/LMAN1/UBXN2B/RAB2A/TMED5/TMED10/PDE4DIP/GOLGA2/EHD3/STX6/CLASP1/DNAJC28/CAM…	88
GO:0071560	cellular response to transforming growth factor beta stimulus	biological process	161/9065	221/17381	1.95453e-10	2.00744e-08	1.44495e-08	1.39682	MEF2C/ACVR1/NLK/HSPA1A/JUN/PPM1A/THBS1/SNX6/ZEB1/CHST11/ARHGEF18/CRK/SOX6/MAPK7/PTK2/KLF10/COL1A1/CDKN1C/FERMT2/EDN1/SMAD4/SOX9/CREB1/SIRT1/TGFBR2/FOS/PTPRK/DNM2/SMAD5/ADAM9/SMAD2/RHOA/TGFBR1/PRDM16/LIMS1/ZFP36L2/DLX1/HSP90AB1/TGFBR3/NR3C1/STK11/MTMR4/YES1/WNT5A/CGN/RNF111/FBN1/SOX5/FGFR2/CD109/HDAC2/LEMD3/MYOCD/ITGA3/FOLR1/CCL2/F11R/ARG1/SRC/CAV1/BCL9L/UBA52/ZNF703/UBB/HIPK2/BAMBI/STK16/PDPK1/SK…	161
GO:0042326	negative regulation of phosphorylation	biological process	307/9065	462/17381	2.00962e-10	2.03915e-08	1.46777e-08	1.2741	NTRK3/SPRED1/CEBPA/CDKN1A/HDAC4/PDCD4/JUN/RGS3/FOXO1/SNX6/PWP1/CORO1C/PREX1/INPP5F/TIMP3/ADAR/KLF4/MAPK7/PIK3R2/CSK/PRKAR2A/CDKN1C/LIF/P2RX7/IGF1R/CALM3/PPP2R5A/CDKN1B/PPARA/HNRNPU/NF1/BMP7/CALM2/FABP4/SMAD4/SIRT1/CDKN2A/RB1/ERRFI1/TLR4/ILK/TP73/PAX6/STAT3/TRIB2/NTF3/AKT1/LRRK2/BAX/GADD45A/PRDX3/CTDSP2/PRNP/WWTR1/NF2/HMGCR/IL6/SMCR8/FAM129A/HHEX/MIDN/ADARB1/DUSP8/PPP1R15B/SOCS4/TSG101/SH3BP5/GRB1…	307
GO:0008361	regulation of cell size	biological process	115/9065	149/17381	2.19475e-10	2.2005e-08	1.58391e-08	1.47985	NTRK3/WNT3A/RAB21/PAK1/RARG/NRP1/LRRC8A/IQGAP3/CLCN3/SHTN1/BDNF/AKT3/VEGFA/FN1/P2RX7/EDN1/TWF2/SRF/CREB1/MSN/ILK/RB1CC1/DNM2/BMPR2/AKT1/RHOA/CXCL12/CDK4/VAV3/HSP90AB1/NDEL1/SPART/RNF6/RAB11A/WNT5A/SPP1/PLXNA4/CDH4/CTTN/IST1/KCNN4/SEMA4D/L1CAM/EPHA7/TTL/MTOR/MAP1B/MTPN/TRPC5/NPM1/LARS/CYFIP1/ZFYVE27/TSC1/VAV2/PTEN/WDR36/MEGF8/LAMTOR4/RDX/ABL1/GOLGA4/PLXNA1/ANO6/WDTC1/E2F4/NKX6-1/ANXA7/DPYSL2/APOE/…	115
GO:0016573	histone acetylation	biological process	113/9065	146/17381	2.31444e-10	2.29321e-08	1.65064e-08	1.484	CHEK1/SET/BRCA2/BRCA1/EP300/MECP2/PHF20/LIF/RPS6KA5/CREBBP/CLOCK/SPI1/SMAD4/MAPK3/BRD7/SIRT1/SNAI2/TAF9/JADE3/LEF1/KANSL1/EPC1/BRD1/SIN3A/KAT2A/SMARCB1/MYOCD/NOC2L/BRPF3/GATA3/CTBP1/KMT2A/TRRAP/SRCAP/NCOA3/WBP2/CHD5/TGFB1/JADE1/ELP3/PPARGC1A/MSL3/TAF12/BRD8/MCRS1/KAT6A/TAF9B/HCFC1/IWS1/RUVBL1/YEATS2/RUVBL2/GTF3C4/DMAP1/APBB1/BRPF1/EP400/ING3/USP22/BEND3/TADA3/ARRB1/ATF2/ACTL6A/MAP3K7/CRTC2/SETD5/…	113
GO:0051962	positive regulation of nervous system development	biological process	315/9065	476/17381	2.38213e-10	2.33226e-08	1.67875e-08	1.26885	CXCR4/NTRK3/MEF2C/HES1/WNT3A/MYB/TGIF2/TLR2/PLAG1/ZEB2/RAB21/BCL2/DNMT3B/PAK1/NRP1/AGRN/FGF20/ZEB1/PITX3/SHTN1/MMD/BDNF/MAP2K1/FGFR1/VEGFA/EZH2/CPNE6/MECP2/APP/FN1/DPYSL3/WASF3/LIF/PRMT5/ARHGDIA/CSF1/TWF2/DICER1/BMP7/HIF1A/PPARG/SRF/NTRK2/ILK/TIMP2/TP73/IFNG/NOTCH1/PAX6/RAP1A/BMPR2/LPAR1/RHOA/CXCL12/NIPBL/DLX1/CLSTN1/PLXNC1/ECT2/CDC20/ZNF365/ITPKA/ASPM/SPEN/IL6/EPHA4/NDEL1/LRP8/STK11/VLDLR/PPP1R9…	315
GO:1901990	regulation of mitotic cell cycle phase transition	biological process	280/9065	417/17381	2.40925e-10	2.33226e-08	1.67875e-08	1.28745	CCND2/PLK2/CCND1/CDKN1A/E2F1/CDC14A/ANLN/ANXA1/ACTR1A/BCL2/CDC14B/CENPJ/CEP63/RAD51C/CDK6/SSNA1/EGFR/TTK/TUBA1A/BRCA1/ATM/EP300/HMGA2/EZH2/CNOT6/ANAPC16/MECP2/APP/ALMS1/CDK10/CDKN1C/CDKN1B/TP53/BRD7/RB1/TP73/MAPRE1/AKT1/MDM2/PDPN/DDX3X/ZFP36L2/CDK4/BAX/GADD45A/CCP110/PCNT/DONSON/UBE2C/FANCI/KNTC1/TRIP13/NDC80/TERT/CDC20/BUB1B/CTDSP2/DDB1/CDK1/CEP41/CDCA5/TICRR/CDC6/FBXO5/PCNA/CDT1/HAUS8/KANK2/BLM…	280
GO:0010720	positive regulation of cell development	biological process	322/9065	488/17381	2.49877e-10	2.39143e-08	1.72134e-08	1.26515	CXCR4/NTRK3/MEF2C/HES1/WNT3A/MYB/TGIF2/CDC42/TLR2/PLAG1/ZEB2/RAB21/BCL2/DNMT3B/PAK1/NRP1/FGF20/IGF1/ZEB1/SHTN1/PREX1/MMD/BDNF/CRK/MAP2K1/FGFR1/VEGFA/EZH2/CPNE6/APP/FN1/DPYSL3/LIF/PRMT5/ARHGDIA/CSF1/EDN1/TWF2/DICER1/BMP7/HIF1A/PPARG/SRF/CRKL/NTRK2/ILK/TIMP2/TP73/IFNG/NOTCH1/PAX6/RAP1A/DNM2/BMPR2/LPAR1/RHOA/CXCL12/LIMS1/NIPBL/DLX1/PLXNC1/ECT2/ZNF365/ITPKA/ASPM/SPEN/IL6/EPHA4/NDEL1/LRP8/STK11/VLDLR/…	322
GO:0098727	maintenance of cell number	biological process	120/9065	157/17381	2.71345e-10	2.53045e-08	1.8214e-08	1.46551	HES1/CDX2/FOXO3/FOXP1/FOXO1/NOTCH2/ARID1A/IGF1/POLR2K/KLF4/HMGA2/EZH2/FGF2/KLF10/LIF/WNT9B/SOX2/JAG1/BMP7/SPI1/SMAD4/SOX9/NOTCH1/STAT3/NANOG/SMAD2/PRDM16/POLR2D/ZFP36L2/NIPBL/ASPM/FANCD2/SOX4/DDX6/KIT/NKAP/SS18/EIF4E/POLR2I/KDM2B/CDH2/SRRT/SMC3/IGF2BP1/BCL9L/SETD1A/SKI/NCOA3/SALL1/MED28/POLR2A/BRAF/POLR2L/CNOT1/CTNNB1/SMC1A/BMPR1A/POLR2B/MED14/RIF1/KDM3A/POLR2C/CUL4A/SMO/POLR2F/RAF1/HOOK3/MED12/Z…	120
GO:0048524	positive regulation of viral process	biological process	85/9065	104/17381	2.71919e-10	2.53045e-08	1.8214e-08	1.56708	CDK9/JUN/HACD3/PPIB/POLR2K/NELFCD/ADAR/EP300/HPN/NOTCH1/PFN1/POLR2D/VAPA/DDX3X/LEF1/DDB1/TOP2A/RSF1/ADARB1/TSG101/IFIT1/LGALS1/NR5A2/PDE12/SMARCB1/POLR2I/PPIA/CHMP2A/SMC3/SP1/LARP1/POLR2A/POLR2L/PABPC1/NELFE/RRP1B/VPS4A/POLR2B/RAD23A/HSPA8/SMARCA4/CHD1/SUPT5H/NUCKS1/POLR2C/CTDP1/CFL1/PPIE/RAB7A/VAPB/VPS37B/POLR2F/SRPK1/APOE/TARBP2/FMR1/CHMP2B/MDFIC/CHMP4B/CCL5/TAF11/STOM/GTF2F1/ZNF639/STAU1/CD4/C…	85
GO:1903050	regulation of proteolysis involved in cellular protein catabolic process	biological process	183/9065	257/17381	2.73416e-10	2.53045e-08	1.8214e-08	1.36529	PLK2/CEBPA/HSPA1A/CTSC/SUFU/OSBPL7/RNF138/ANKIB1/PIAS1/FBXW7/ANAPC16/PTK2/FHIT/N4BP1/TRIB2/AKT1/LRRK2/MDM2/TAF9/UBE2C/HSP90AB1/CDC20/BUB1B/SENP1/CDK1/FBXO5/BTRC/EPHA4/PSMD9/SOCS4/CSNK1A1/BAG5/MAD2L1/NOP53/SMARCC1/RGN/CCDC22/PSME1/UBAC2/CCNB1/GLMN/CAV1/AXIN1/UBA52/PSMD3/UBB/CCAR2/BAG6/PSMB2/RACK1/UBQLN4/PRKACA/ANAPC1/DVL1/PSMD4/FZR1/PSMD11/XBP1/RAD23A/USP5/SKP1/PSMC1/PLK1/GPX1/KEAP1/PSMB3/PSMA7/PA…	183
GO:0051348	negative regulation of transferase activity	biological process	251/9065	369/17381	2.95379e-10	2.704e-08	1.94632e-08	1.30423	SPRED1/CEBPA/CDKN1A/PDCD4/RGS3/SNX6/CORO1C/PREX1/ADAR/MAPK7/ANAPC16/CSK/PRKAR2A/CDKN1C/IGF1R/PPP2R5A/CDKN1B/HNRNPU/NF1/TP53/BMP7/PPARG/FABP4/SIRT1/CDKN2A/RB1/ERRFI1/ILK/TP73/TRIB2/AKT1/GADD45A/PRDX3/UBE2C/CDC20/BUB1B/CDK1/WWTR1/FBXO5/NF2/HMGCR/IL6/SMCR8/HHEX/MIDN/ADARB1/DUSP8/PSMD9/SOCS4/TSG101/SH3BP5/NUP62/SPRED2/PPP1R1C/GSTP1/SPRY2/BAG5/MAD2L1/RGN/PTPN22/MYOCD/PSME1/HIPK3/PTPN1/SFN/THY1/CCNB1/S…	251
GO:0071559	response to transforming growth factor beta	biological process	163/9065	225/17381	3.08503e-10	2.79377e-08	2.01094e-08	1.38903	MEF2C/ACVR1/NLK/HSPA1A/JUN/PPM1A/THBS1/SNX6/ZEB1/CHST11/ARHGEF18/CRK/SOX6/RUNX3/MAPK7/PTK2/KLF10/COL1A1/CDKN1C/FERMT2/EDN1/SMAD4/SOX9/CREB1/SIRT1/TGFBR2/FOS/PTPRK/DNM2/SMAD5/ADAM9/SMAD2/RHOA/TGFBR1/PRDM16/LIMS1/ZFP36L2/DLX1/HSP90AB1/TGFBR3/NR3C1/STK11/MTMR4/YES1/WNT5A/CGN/RNF111/FBN1/SOX5/FGFR2/CD109/HDAC2/LEMD3/MYOCD/ITGA3/FOLR1/CCL2/F11R/ARG1/SRC/CAV1/BCL9L/UBA52/ZNF703/UBB/HIPK2/BAMBI/STK16/PD…	163
GO:0001558	regulation of cell growth	biological process	264/9065	391/17381	3.32958e-10	2.98316e-08	2.14726e-08	1.2946	NTRK3/S100A9/WNT3A/CDC42/CDKN1A/BAP1/RAB21/BCL2/WT1/H3F3B/HSPA1A/PAK1/NRP1/F2/EGFR/CYR61/IGF1/GJA1/SHTN1/BDNF/G6PD/VEGFA/CPNE6/HNF4A/IP6K2/FN1/DCBLD2/HPN/DDR1/TSPYL2/CDKN1B/EDN1/TWF2/TP53/ERBB2/PPARG/SRF/SMAD4/SIRT1/CDKN2A/EPB41L3/RB1/IGFBP2/IGFBP5/SMARCA2/ILK/FBLN5/EGLN2/CTGF/DNM2/BMPR2/AKT1/CSNK2A1/TGFBR1/CXCL12/TAF9/DDX3X/RBBP7/CLSTN1/PSRC1/LEF1/SESN2/TMC8/SERTAD2/NDEL1/STK11/TSG101/SPART/RNF6…	264
GO:0007265	Ras protein signal transduction	biological process	232/9065	338/17381	3.75979e-10	3.33316e-08	2.39919e-08	1.31607	DNMT1/STMN1/MET/KRAS/CDC42/PLK2/CDKN1A/HACE1/JUN/ROCK1/PAK1/RHOB/GRB2/HACD3/NRP1/NOTCH2/IQGAP3/IGF1/PLEKHG2/SHTN1/PREX1/ARHGEF18/CRK/ARHGAP29/FGF2/CCNA2/ARHGDIA/CSF1/NF1/CHUK/HRAS/TP53/CRKL/CDKN2A/RB1/TIMP2/NOTCH1/RAP1A/DNM2/WASF2/PDPN/LPAR1/RHOA/RASSF1/VAV3/ECT2/CYTH1/SSX2IP/CDC42EP4/GBF1/ABI2/RAP2C/ARHGAP1/SHC1/NUP62/DLC1/SPRY2/RAP1B/F2RL1/G3BP2/RALB/RAPGEF2/MFN2/GNB1/ITGA3/GNA13/CDH13/G3BP1/IT…	232
GO:0050792	regulation of viral process	biological process	142/9065	192/17381	3.97628e-10	3.48835e-08	2.5109e-08	1.41806	CDK9/BCL2/JUN/RNASEL/HACD3/PPIB/POLR2K/DDX5/NELFCD/ADAR/EP300/HMGA2/HPN/CXCL8/HDAC1/NOTCH1/IFITM1/PFN1/POLR2D/VAPA/DDX3X/FAM111A/LEF1/DDB1/TOP2A/RSF1/ADARB1/TSG101/TRIM59/TARDBP/RSAD2/STAT1/IFIT1/ISG15/IFITM3/OASL/IFIT5/SLPI/LGALS1/TRIM26/NR5A2/PDE12/SMARCB1/POLR2I/PPIA/CHMP2A/ISG20/SMC3/SP1/LARP1/POLR2A/POLR2L/TRIM28/PABPC1/NELFE/RRP1B/VPS4A/POLR2B/RAD23A/ILF3/HSPA8/SMARCA4/CHD1/PARP10/TRIM27/SU…	142
GO:0010821	regulation of mitochondrion organization	biological process	163/9065	226/17381	5.38241e-10	4.67326e-08	3.36379e-08	1.38289	HES1/E2F1/BAP1/BCL2/HSPA1A/OMA1/YWHAQ/IGF1/HPS4/FBXW7/TP53/HIF1A/HK2/BCL2L11/KDR/BBC3/TP73/YWHAZ/PMAIP1/AKT1/LRRK2/MAPK8/BAX/STARD7/HHAT/FAM20B/CDC37/RAC2/DYNLL2/RNF41/YWHAH/NKAP/PRELID1/GOLPH3/KAT2A/CTTN/MFN2/SFN/CSNK2A2/TMEM14A/TMEM135/MIEF1/ATG7/VDAC1/WDR46/SREBF1/NMT1/HTRA2/TSC2/GSK3A/U2AF2/PPP3R1/USP36/MYBPC1/HUWE1/PPARGC1A/PPP1R13B/HTT/YWHAE/GPX1/SLC25A5/PARK7/TIGAR/ATP13A2/HSPA1L/RUVBL1/SM…	163
GO:0000082	G1/S transition of mitotic cell cycle	biological process	187/9065	265/17381	5.86714e-10	5.0256e-08	3.6174e-08	1.35302	ACVR1/CDC25A/CCND2/PLK2/CCND1/CDKN1A/E2F1/WEE1/ANXA1/BCL2/CENPJ/PRIM1/CCNE1/CDK6/CCNE2/POLA2/IQGAP3/EGFR/E2F6/ATM/PIAS1/EP300/EZH2/CNOT6/CDK10/BACH1/CDKN1B/CDKN3/TP53/CUL2/BRD7/CDKN2A/RB1/TP73/AKT1/MDM2/PDPN/DDX3X/CDK4/BAX/GADD45A/RRM2/POLA1/ORC6/MCM3/MCM10/DHFRP1/TERT/CTDSP2/MAX/CDK1/TYMS/POLE/MCM5/MCM7/CDC6/FBXO5/PCNA/RCC1/CDT1/KANK2/MCM8/POLE2/MCM6/MCM4/SOX4/NACC2/RPA2/TNKS1BP1/KLF11/CNOT4/ORC…	187
GO:0019827	stem cell population maintenance	biological process	118/9065	155/17381	5.91208e-10	5.0256e-08	3.6174e-08	1.45968	HES1/CDX2/FOXO3/FOXP1/FOXO1/NOTCH2/ARID1A/POLR2K/KLF4/HMGA2/FGF2/KLF10/LIF/WNT9B/SOX2/JAG1/BMP7/SPI1/SMAD4/SOX9/NOTCH1/STAT3/NANOG/SMAD2/PRDM16/POLR2D/ZFP36L2/NIPBL/ASPM/FANCD2/SOX4/DDX6/KIT/NKAP/SS18/EIF4E/POLR2I/KDM2B/CDH2/SRRT/SMC3/IGF2BP1/BCL9L/SETD1A/SKI/NCOA3/SALL1/MED28/POLR2A/BRAF/POLR2L/CNOT1/CTNNB1/SMC1A/BMPR1A/POLR2B/MED14/RIF1/KDM3A/POLR2C/CUL4A/SMO/POLR2F/RAF1/HOOK3/MED12/ZCCHC11/SFR…	118
GO:0048562	embryonic organ morphogenesis	biological process	198/9065	283/17381	5.96723e-10	5.0256e-08	3.6174e-08	1.34148	MEF2C/HES1/ACVR1/WNT3A/GATA4/HOXA5/SOD1/MAFB/RARG/ARID1A/HAND2/HOXD10/SUFU/HOXB8/ZEB1/CHST11/HOXA7/FGFR1/IFT52/HPN/HOXB7/WNT9B/DVL2/EDN1/BMP7/HIF1A/SRF/SOX9/MAPK3/PDGFRA/SP3/MAPK1/SCRIB/FGF9/TGFBR2/NOTCH1/PAX6/RUNX2/SMAD2/FOXF2/TGFBR1/NIPBL/EPHA2/SIX1/MTHFD1/TMED2/MYCN/WDR60/HOXC4/HOXA3/SIX4/HOXB5/WNT5A/FRS2/FBN1/SPRY2/FGFR2/MYO3B/GLI2/FOLR1/GATA3/KDM2B/SLC39A3/FOXN4/NR4A3/RDH10/HAND1/AXIN1/GNAS/…	198
GO:0090150	establishment of protein localization to membrane	biological process	193/9065	275/17381	6.50547e-10	5.42466e-08	3.90464e-08	1.34565	AKT2/E2F1/BCL2/GOLPH3L/PAK1/YWHAQ/GOLGA7/EGFR/KCNE1/CSK/HSPA4/TP53/ERBB2/BCL2L11/SCRIB/TP73/YWHAZ/PMAIP1/MAPK8/BAX/NSG1/PRNP/SEC61A1/GOPC/RAB34/DYNLL2/ICMT/CLIP1/ARL6IP1/YWHAH/RAB11A/RAB31/SEC61B/DMTN/GOLPH3/SEC62/CCL2/VAMP7/SFN/SSR1/RAB10/MIEF1/RPS8/RPS2/SRP68/UBA52/RPL36A/HSP90AA1/RPL29/BAG6/RPL18A/RPL3/RPS6/RACK1/RPL4/RPLP1/RPS14/NMT1/BRAF/RPL7A/RPL10/RPL18/RPL37/RPL13/RPS27/RPL8/RPS15A/RPS5/P…	193
GO:0070482	response to oxygen levels	biological process	251/9065	371/17381	6.70561e-10	5.53673e-08	3.98531e-08	1.2972	CXCR4/GATA6/MYB/UCP2/TLR2/CDKN1A/E2F1/FOXO3/IRAK1/DNMT3A/BCL2/DNMT3B/PAK1/FOXO1/THBS1/PKM/ATM/ITPR1/VEGFA/EP300/PRKCE/ETS1/HSP90B1/MECP2/CCNA2/VCAM1/COL1A1/PLAU/CREBBP/BACH1/HMOX1/CDKN1B/PPARA/EDN1/NF1/FAS/TP53/BMP7/HIF1A/CUL2/PPARG/SRF/SMAD4/CREB1/SIRT1/SLC2A4/PTGS2/EGLN2/SLC8A1/TGFBR2/TEK/NOTCH1/CTGF/PMAIP1/AKT1/MDM2/LPAR1/EDNRA/CXCL12/CDK4/HYOU1/TERT/NPPC/TGFBR3/APOLD1/EGLN3/PSMD9/PRKAA1/HIF1A…	251
GO:0071375	cellular response to peptide hormone stimulus	biological process	210/9065	303/17381	6.83935e-10	5.59233e-08	4.02533e-08	1.32887	UCP2/AKT2/RNASEL/CCND3/PAK1/FOXO1/GRB2/ATP6V0A1/PKM/ADCY6/CRK/ATP6V1B2/PIK3R2/CSK/PTK2/CCNA2/PRKAR2A/IRS1/NFKB1/IGF1R/EDN1/IGF2/PPARG/MAPK3/CREB1/SIRT1/MAPK1/ERRFI1/SLC2A4/STAT3/AKT1/MDM2/CDK4/ADCY9/GJB2/MAX/CDC6/IL6/NDEL1/PRKAA1/ATP6V1C1/PDE3B/GRB10/SHC1/RAB31/FBN1/GSTP1/GNG5/AGTRAP/RAP1B/TSHR/ATP6V1A/SMARCC1/GNRHR/GNB2/GNB1/ATP6V1E1/PTPN1/SRSF5/CCL2/ARG1/SRC/NR4A3/RAB10/NR4A1/SP1/CAV1/PHIP/EIF4…	210
GO:0045862	positive regulation of proteolysis	biological process	264/9065	393/17381	7.33596e-10	5.94072e-08	4.27609e-08	1.28801	S100A9/WNT3A/PLK2/CEBPA/FADD/CARD8/HSPA1A/PICALM/CTSC/ANP32B/CYR61/CASP9/OSBPL7/RNF138/ANKIB1/PIAS1/FBXW7/ANAPC16/APP/FN1/HSPD1/PTK2/HPN/FAS/ACVR1C/PPARG/MAPK3/SIRT1/BCL2L11/IFNG/CTGF/STAT3/PMAIP1/TRIB2/AKT1/LRRK2/MDM2/ADAM9/DDX3X/BAX/HMGB1/UBE2C/CDC20/BUB1B/SENP1/CDK1/NLRP3/FBXO5/SNX9/BTRC/EPHA4/EGLN3/PSMD9/SOCS4/F3/CSNK1A1/DLC1/IFI27/PRELID1/SEMG2/MAD2L1/NOP53/HDAC2/RGN/AIM2/CCDC22/PACSIN3/PSME…	264
GO:0006998	nuclear envelope organization	biological process	72/9065	86/17381	7.62871e-10	6.11895e-08	4.40438e-08	1.60524	POM121/NDC1/SYNE2/NUP58/CDK1/SUN2/NDEL1/UBXN2A/NUP62/TARDBP/EMD/NUP50/POM121C/PPP2R2A/LEMD3/CHMP2A/NUP160/CTDNEP1/NUP210/CCNB1/NUP153/TOR1AIP2/VPS4A/PLK1/RANBP2/NUTF2/NUP214/AAAS/REEP4/PRKCA/NUP37/SUN1/NEK9/PPP2CA/AKAP8L/TPR/NUPL2/NUP98/NUP43/CNEP1R1/PAFAH1B1/REEP3/UBXN2B/CHMP4B/OSBPL8/NUP205/TOR1A/PARP11/NUP155/TOR1B/TMEM43/TMEM170A/SUMO1/SEH1L/NUP54/DMPK/NUP93/NSFL1C/TOR1AIP1/NUP188/PPP2R1A/LEM…	72
GO:0021537	telencephalon development	biological process	170/9065	238/17381	7.92516e-10	6.29677e-08	4.53238e-08	1.36955	DRD1/HES1/WNT3A/ZEB2/CDK6/LRP1/NRP1/EGFR/EZH2/PEX13/NF1/ERBB4/HIF1A/SRF/NTRK2/TRA2B/SLC8A1/BTBD3/PAX6/LRRK2/CSNK2A1/LPAR1/CXCL12/BAX/DLX1/SYNE2/LEF1/HPRT1/ASPM/WDR62/TACC3/TACC1/NF2/UQCRQ/SUN2/NDEL1/LRP8/NFIB/PAPD4/EZH1/BCL11B/WNT5A/KDM6B/BCL2A1/BCAN/KIF5B/ATP2B4/PLXNA4/C12orf57/KAT2A/OXTR/FLNA/UBA6/FBXO45/KDM2B/CSNK2A2/CDH2/NR4A3/CEP120/IGF2BP1/XRN2/LAMB1/EIF2B5/NDE1/SECISBP2/GART/SKI/SALL1/CTNN…	170
GO:0018394	peptidyl-lysine acetylation	biological process	119/9065	157/17381	8.06684e-10	6.34943e-08	4.57028e-08	1.4533	CHEK1/SET/BRCA2/BRCA1/EP300/MECP2/PHF20/LIF/RPS6KA5/CREBBP/CLOCK/SPI1/SMAD4/MAPK3/BRD7/SIRT1/SNAI2/TAF9/JADE3/LEF1/SOX4/KANSL1/EPC1/BRD1/SIN3A/KAT2A/HDAC2/HINT2/SMARCB1/MYOCD/NOC2L/BRPF3/GATA3/CTBP1/KMT2A/TRRAP/BAG6/SRCAP/NCOA3/WBP2/CHD5/TGFB1/JADE1/ELP3/PPARGC1A/MSL3/TAF12/BRD8/MCRS1/KAT6A/TAF9B/HCFC1/IWS1/RUVBL1/YEATS2/RUVBL2/GTF3C4/DMAP1/APBB1/BRPF1/EP400/ING3/USP22/BEND3/TADA3/ARRB1/ATF2/ACTL…	119
GO:0050770	regulation of axonogenesis	biological process	117/9065	154/17381	8.70093e-10	6.78512e-08	4.88389e-08	1.45671	NTRK3/WNT3A/ZEB2/RAB21/PAK1/NRP1/SHTN1/UST/BDNF/MAP2K1/VEGFA/FN1/PTK2/LRP4/ARHGDIA/TWF2/SRF/NTRK2/ILK/DNM2/BMPR2/RHOA/CXCL12/PLXNC1/EPHA4/NDEL1/STK11/SPART/RNF6/RAB11A/WNT5A/SPP1/PLXNA4/CDH4/TUBB2B/CTTN/IST1/SEMA4D/PLXNB2/L1CAM/THY1/EPHA7/TTL/TIAM1/BRAF/MAP1B/ROBO2/SSH2/TRPC5/AMIGO1/PLXND1/METRN/SYNGAP1/TRAK2/CYFIP1/ZFYVE27/PTEN/WDR36/MEGF8/MARK2/TRAK1/ABL1/STK25/GOLGA4/PLXNA1/NKX6-1/EFNA1/DPYSL2…	117
GO:0018393	internal peptidyl-lysine acetylation	biological process	115/9065	151/17381	9.36006e-10	7.17472e-08	5.16432e-08	1.46025	CHEK1/SET/BRCA2/BRCA1/EP300/MECP2/PHF20/LIF/RPS6KA5/CREBBP/CLOCK/SPI1/SMAD4/MAPK3/BRD7/SIRT1/SNAI2/TAF9/JADE3/LEF1/KANSL1/EPC1/BRD1/SIN3A/KAT2A/SMARCB1/MYOCD/NOC2L/BRPF3/GATA3/CTBP1/KMT2A/TRRAP/BAG6/SRCAP/NCOA3/WBP2/CHD5/TGFB1/JADE1/ELP3/PPARGC1A/MSL3/TAF12/BRD8/MCRS1/KAT6A/TAF9B/HCFC1/IWS1/RUVBL1/YEATS2/RUVBL2/GTF3C4/DMAP1/APBB1/BRPF1/EP400/ING3/USP22/BEND3/TADA3/ARRB1/ATF2/ACTL6A/MAP3K7/CRTC2/S…	115
GO:0032869	cellular response to insulin stimulus	biological process	143/9065	195/17381	9.37092e-10	7.17472e-08	5.16432e-08	1.40607	UCP2/AKT2/RNASEL/CCND3/PAK1/FOXO1/GRB2/ATP6V0A1/PKM/ATP6V1B2/PIK3R2/IRS1/IGF1R/IGF2/PPARG/SIRT1/ERRFI1/SLC2A4/AKT1/CDK4/NDEL1/PRKAA1/ATP6V1C1/PDE3B/GRB10/SHC1/RAB31/GSTP1/ATP6V1A/SMARCC1/ATP6V1E1/PTPN1/SRSF5/CCL2/SRC/RAB10/SP1/PHIP/EIF4EBP2/PDPK1/SREBF1/IRS4/TSC2/GSK3A/XBP1/ATP6AP1/BAIAP2/FER/PTPN11/ATP6V0C/USF1/SOGA1/GAB1/NUCKS1/PARP1/CYFIP1/MARS/TSC1/PTEN/SLC25A33/MYO5A/ZNF106/APPL1/APRT/PIK3R3…	143
GO:0016236	macroautophagy	biological process	198/9065	284/17381	9.57957e-10	7.22525e-08	5.20069e-08	1.33676	TP53INP1/SNX6/ATP6V0A1/ATP6V1B2/HMOX1/HGS/SNAPIN/HIF1A/MAPK3/ATG2B/UVRAG/SIRT1/KDR/TBK1/RB1CC1/RAB5A/AKT1/LRRK2/CSNK2A1/MAPK8/PIP4K2C/SESN2/VAMP8/CDC37/SMCR8/DYNLL2/RAB1B/UBXN2A/PRKAA1/ATP6V1C1/TSG101/RNF41/RAB12/FYCO1/PIP4K2B/CAPN1/RALB/ATP6V1A/PRKAG1/MFN2/PACS2/CHMP2A/GNAI3/ATP6V1E1/RIPK2/CSNK2A2/SRC/ATG7/VDAC1/UBA52/UBB/STAM2/RHEB/LARP1/PIKFYVE/WDR45B/VPS37C/CAPNS1/UBQLN4/MTOR/PRKACA/HTRA2/TSC…	198
GO:1901987	regulation of cell cycle phase transition	biological process	295/9065	446/17381	9.6085e-10	7.22525e-08	5.20069e-08	1.26822	CDC25A/CCND2/PLK2/CCND1/CDKN1A/E2F1/CDC14A/ANLN/ANXA1/ACTR1A/BCL2/CDC14B/CENPJ/CEP63/RAD51C/CDK6/SSNA1/EGFR/TTK/TUBA1A/BRCA1/ATM/EP300/HMGA2/EZH2/FBXW7/CNOT6/ANAPC16/MECP2/APP/ALMS1/CDK10/CDKN1C/CDKN1B/TP53/BRD7/RB1/TP73/MAPRE1/AKT1/MDM2/PDPN/DDX3X/ZFP36L2/CDK4/BAX/GADD45A/CCP110/PCNT/DONSON/UBE2C/FANCI/KNTC1/TRIP13/NDC80/TERT/CDC20/BUB1B/CTDSP2/DDB1/CDK1/CEP41/CDCA5/TICRR/CDC6/FBXO5/PCNA/CDT1/HA…	295
GO:0070972	protein localization to endoplasmic reticulum	biological process	98/9065	125/17381	1.02213e-09	7.61805e-08	5.48343e-08	1.50322	VAPA/GBF1/SEC61A1/SEC61B/KDELR1/BCAP29/SEC62/PDIA3/GPAA1/UBAC2/RAB10/RPS8/RPS2/SRP68/UBA52/RPL36A/RPL29/RPL18A/RPL3/RPS6/RPL4/RPLP1/RPS14/RPL7A/RPL10/RPL18/RPL37/RPL13/RPS27/RPL8/RPS15A/RPS5/RPL10A/SRP9/RPS18/RPS10/SRPRA/RPS3A/RPS28/RPLP0/RPS4X/RPL9/RPL23A/RPL27A/RPS3/RPL26/RPL12/RPL22/KDELR2/RPL31/RPL35A/RPS9/RPL34/RPS12/RPL15/RPL36/RPS21/RPL5/RPL32/RPS26/RPL14/RPS7/GRIK5/RPL27/RPS17/RPL13A/SEC6…	98
GO:0001838	embryonic epithelial tube formation	biological process	96/9065	122/17381	1.05333e-09	7.78173e-08	5.60124e-08	1.50875	TRAF6/ZEB2/RARG/ARID1A/SUFU/SDC4/IFT52/WNT9B/DVL2/BMP7/HIF1A/SOX9/PTCH1/SCRIB/PFN1/VASP/SIX1/MTHFD1/TMED2/SOX4/SIX4/LUZP1/WNT5A/DLC1/KAT2A/FOLR1/GATA3/KDM2B/PLXNB2/GLMN/HAND1/MTHFD1L/SKI/PRKACA/DVL1/TSC2/CTNNB1/TGFB1/TEAD2/TSC1/MIB1/PTK7/SEMA4C/CFL1/TCTN1/ABL1/SEC24B/RALA/GDF7/LRP2/MED12/SFRP1/STK3/SETD2/NODAL/VANGL2/FZD6/STK4/SOX11/TRIM71/PRICKLE1/NOG/LRP6/ADM/RET/OSR1/BBS4/GREM1/KDM6A/NPHP3/PAX…	96
GO:0007409	axonogenesis	biological process	287/9065	433/17381	1.16908e-09	8.56177e-08	6.16271e-08	1.27087	CXCR4/NTRK3/STMN1/TUBB3/WNT3A/KRAS/ZEB2/RAB21/BCL2/PAK1/GRB2/PICALM/PDLIM7/NRP1/SHTN1/UST/BDNF/EGR2/MAP2K1/VEGFA/MAPK7/APP/FN1/PTK2/LRP4/ARHGDIA/RPS6KA5/TWF2/HRAS/ERBB2/BMP7/SIAH1/SRF/SMAD4/MAPK3/CREB1/PTCH1/MAPK1/NTRK2/ARTN/ILK/NCAM1/NOTCH1/PAX6/DNM2/BMPR2/RHOA/CXCL12/PLXNC1/VASP/NRP2/EPHA4/NDEL1/ADARB1/NFIB/STK11/VLDLR/GRB10/SPART/SHC1/RNF6/BCL11B/RAB11A/WNT5A/FRS2/SPP1/FGFR2/B3GNT2/PARD6B/USP3…	287
GO:0006475	internal protein amino acid acetylation	biological process	118/9065	156/17381	1.18211e-09	8.58252e-08	6.17765e-08	1.45032	CHEK1/SET/BRCA2/BRCA1/EP300/MECP2/PHF20/LIF/RPS6KA5/CREBBP/CLOCK/SPI1/SMAD4/MAPK3/BRD7/SIRT1/SNAI2/TAF9/JADE3/LEF1/KANSL1/EPC1/BRD1/SIN3A/KAT2A/SMARCB1/MYOCD/NOC2L/BRPF3/GATA3/CTBP1/KMT2A/TRRAP/BAG6/SRCAP/NCOA3/WBP2/CHD5/TGFB1/JADE1/ELP3/PPARGC1A/MSL3/TAF12/BRD8/MCRS1/MDH2/KAT6A/TAF9B/HCFC1/IWS1/RUVBL1/YEATS2/RUVBL2/GTF3C4/DMAP1/APBB1/BRPF1/EP400/ING3/USP22/BEND3/TADA3/ARRB1/NAA10/ATF2/ACTL6A/MAP…	118
GO:0031589	cell-substrate adhesion	biological process	217/9065	316/17381	1.29862e-09	9.34785e-08	6.72853e-08	1.31668	CDC42/BCL2/CDK6/ROCK1/THBS1/NRP1/ITGB4/CORO1C/CYR61/UTRN/FBLN2/AXL/PREX1/SDC4/HOXA7/CRK/VEGFA/PRKCE/FN1/PTK2/VCAM1/AGR2/COL1A1/PLAU/CSF1/DDR1/FERMT2/NF1/MUC4/SRF/CRKL/SERPINE1/BCL2L11/CDKN2A/KDR/MERTK/ILK/FBLN5/CD44/TEK/NOTCH1/CTGF/LAMC1/PTPRK/DNM2/ADAM9/PDPN/RHOA/LIMS1/ACTN1/EPDR1/RAC2/NF2/DLC1/ITGB2/RCC2/CD63/DMTN/ITGA6/UNC13D/LGALS1/CALR/ACTN4/FLNA/PHLDB2/PARVA/CTTN/ITGA1/ITGA3/TBCD/CDH13/L1CA…	217
GO:0045666	positive regulation of neuron differentiation	biological process	226/9065	331/17381	1.33701e-09	9.48898e-08	6.83011e-08	1.30914	NTRK3/MEF2C/WNT3A/TGIF2/ZEB2/RAB21/BCL2/DNMT3B/PAK1/NRP1/FGF20/ZEB1/SHTN1/MMD/BDNF/MAP2K1/FGFR1/VEGFA/EZH2/CPNE6/FN1/DPYSL3/ARHGDIA/TWF2/BMP7/SRF/NTRK2/ILK/TIMP2/IFNG/RAP1A/BMPR2/LPAR1/RHOA/CXCL12/DLX1/PLXNC1/ECT2/ITPKA/IL6/EPHA4/NDEL1/LRP8/STK11/VLDLR/PPP1R9A/TCF4/PTPRD/RAB11A/WNT5A/ABL2/RIMS2/DKK1/NPTN/CDH4/EIF4G1/TUBB2B/RAPGEF2/CAPRIN1/GLI2/ITGA3/IST1/SEMA4D/NBL1/PLXNB2/VAMP7/L1CAM/FIG4/IL2/CP…	226
GO:0031570	DNA integrity checkpoint	biological process	123/9065	164/17381	1.34076e-09	9.48898e-08	6.83011e-08	1.43803	PLK2/CCND1/CDKN1A/E2F1/CHEK1/CDC14B/CENPJ/CEP63/MSH2/BRCA1/ATM/EP300/HMGA2/CNOT6/PEA15/CDKN1B/CLOCK/TP53/TP73/MDM2/BAX/GADD45A/DONSON/FANCI/CDK1/TOP2A/TICRR/CDC6/PCNA/CDT1/BLM/SOX4/RPA2/TNKS1BP1/CNOT4/ZNF385A/MDC1/MRE11/NOP53/SFN/CCNB1/RAD9A/UBA52/UBB/CCAR2/CNOT1/FZR1/CDC45/GIGYF2/CDC5L/PTPN11/E2F8/PLK1/NPM1/CASP2/FBXO31/FOXN3/ORAOV1/CNOT8/CNOT9/BRCC3/TAOK3/PRPF19/RPL26/CUL4A/MAPKAPK2/UBC/TAOK2/B…	123
GO:0007062	sister chromatid cohesion	biological process	103/9065	133/17381	1.3573e-09	9.52598e-08	6.85674e-08	1.48488	RAD51C/FBXW7/KIF2A/KIF22/RB1/MAPRE1/NSL1/NIPBL/SGO1/HASPIN/XPO1/CENPU/KNTC1/NDC80/DSN1/SKA1/CDC20/BUB1B/CENPQ/DSCC1/CDCA5/SPC25/ZWINT/ESPL1/FEN1/DYNLL2/NDEL1/POGZ/CLIP1/CKAP5/RCC2/SPC24/DYNC1LI1/MRE11/MAD2L1/CENPF/NUP160/KIF2C/WAPL/SMC3/NDE1/TNKS/DDX11/CTNNB1/SMC1A/DYNC1H1/RPS27/ATRX/MCMBP/PDS5A/PLK1/RANBP2/SFPQ/STAG2/NUP37/PHB2/RANGAP1/AHCTF1/NAA10/BUB1/CENPS/AURKB/NUP98/NUP43/AXIN2/BIRC5/PAFAH1…	103
GO:0006614	SRP-dependent cotranslational protein targeting to membrane	biological process	75/9065	91/17381	1.45477e-09	1.00952e-07	7.26647e-08	1.58025	SEC61A1/SEC61B/RPS8/RPS2/SRP68/UBA52/RPL36A/RPL29/RPL18A/RPL3/RPS6/RPL4/RPLP1/RPS14/RPL7A/RPL10/RPL18/RPL37/RPL13/RPS27/RPL8/RPS15A/RPS5/RPL10A/SRP9/RPS18/RPS10/SRPRA/RPS3A/RPS28/RPLP0/RPS4X/RPL9/RPL23A/RPL27A/RPS3/RPL26/RPL12/RPL22/RPL31/RPL35A/RPS9/RPL34/RPS12/RPL15/RPL36/RPS21/RPL5/RPL32/RPS26/RPL14/RPS7/RPL27/RPS17/RPL13A/SEC63/RPS15/RPS24/RPL41/RPS19/RPL30/SRP14/RPS27A/ZFAND2B/SRP72/RPS23/RP…	75
GO:0007093	mitotic cell cycle checkpoint	biological process	121/9065	161/17381	1.46238e-09	1.00952e-07	7.26647e-08	1.44101	PLK2/CCND1/CDKN1A/E2F1/CENPJ/MSH2/TTK/BRCA1/ATM/EP300/HMGA2/CNOT6/CDKN1B/HRAS/TP53/RB1/TP73/MDM2/BAX/GADD45A/DONSON/FANCI/KNTC1/TRIP13/NDC80/BUB1B/CDK1/TOP2A/TICRR/PCNA/CDT1/ZWINT/BLM/SOX4/RPA2/TNKS1BP1/CNOT4/ZNF385A/MDC1/DYNC1LI1/MRE11/MAD2L1/NOP53/CENPF/ZNF207/SFN/CCNB1/RAD9A/UBA52/UBB/RPS6/CNOT1/INTS3/TGFB1/VPS4A/GIGYF2/MAD2L1BP/E2F8/PLK1/NPM1/CASP2/PRCC/FBXO31/IK/FOXN3/NABP2/ORAOV1/CNOT8/CNOT…	121
GO:0030099	myeloid cell differentiation	biological process	261/9065	390/17381	1.61254e-09	1.10413e-07	7.94747e-08	1.28317	MEF2C/CDC42/CEBPA/TLR2/FADD/FOXO3/TRAF6/H3F3B/JUN/CDK6/HOXA5/FOXP1/MAFB/RARG/THBS1/SFXN1/MOV10/ASH2L/ANXA2/HOXA9/CASP9/HOXB8/HIST1H3B/ADAR/HOXA7/G6PD/SOX6/MED1/VEGFA/EP300/ETS1/APP/KLF10/HOXB7/CDKN1C/LIF/JUNB/CSF1/CREBBP/JAG1/NF1/FAS/HIF1A/SPI1/PPARG/SRF/SP3/CREB1/SIRT1/HDAC1/RB1/TLR4/NFKBIA/TGFBR2/IFNG/STAT3/FOS/SMAD5/RBFOX2/WASF2/OSTM1/CEBPB/PRDX3/HMGB1/LEF1/ACTN1/RBBP5/EPHA2/SENP1/GLO1/TGFBR3/…	261
GO:0048872	homeostasis of number of cells	biological process	166/9065	233/17381	1.71194e-09	1.16274e-07	8.36933e-08	1.36603	MEF2C/KRAS/FADD/FOXO3/ANXA1/BAP1/BCL2/CDK6/HOXA5/SOD1/MAFB/SFXN1/AXL/ADAR/G6PD/SOX6/MED1/AKT3/VEGFA/ETS1/EZH2/CYLD/P2RX7/CSF1/HMOX1/TSC22D3/FAS/HIF1A/SPI1/SRF/SOX9/SP3/BCL2L11/RB1/MERTK/IFNG/STAT3/PMAIP1/FLT3/SMAD5/RBFOX2/AKT1/BAX/HMGB1/SENP1/TGFBR3/MTHFD1/IL6/RASSF2/TEX15/ACVR2A/KIT/STAT1/ISG15/DMTN/TMOD3/GATA3/SLC39A3/CDH2/IL2/LGR4/DNASE2/KMT2A/SETD1A/HIPK2/GPI/UBAP2L/RPS6/RPS14/BCR/MIF/LIPA/TG…	166
GO:0006367	transcription initiation from RNA polymerase II promoter	biological process	136/9065	185/17381	1.83011e-09	1.22706e-07	8.83228e-08	1.40953	CDK9/CCND1/CDKN1A/NOTCH3/ESR1/GTF2H1/RARG/NOTCH2/CAND1/POLR2K/NOTCH4/MED1/HNF4A/NR1I2/TAF4B/RXRB/MED16/MED6/CREBBP/PPARA/PPARG/SRF/SOX9/CREB1/E2F3/NOTCH1/CTGF/RUNX2/TAF9/NR6A1/POLR2D/CDK4/BAX/HMGB1/CDK1/WWTR1/E2F2/NR3C1/NR2C2AP/CBFB/TCF4/MED4/PGR/NR5A2/POLR2I/CCNB1/NR4A3/NR4A1/ATF7IP/NCOA6/POLR2A/CTNNBIP1/POLR2L/NR1D2/TRIM28/MED15/POLR2B/MED14/PSMC1/GTF2I/PPARGC1A/TAF12/CDK8/POLR2C/TEAD2/PSMC5/TA…	136
GO:0043543	protein acylation	biological process	156/9065	217/17381	1.85035e-09	1.22706e-07	8.83228e-08	1.37839	CHEK1/PPM1A/FOXO1/SET/GOLGA7/BRCA2/BRCA1/EP300/MECP2/PHF20/LIF/RPS6KA5/CREBBP/CLOCK/SPI1/SMAD4/MAPK3/BRD7/SIRT1/SNAI2/TAF9/JADE3/HHAT/LEF1/DSCC1/SOX4/NAA30/KANSL1/EPC1/BRD1/SIN3A/KAT2A/HDAC2/HINT2/SMARCB1/MYOCD/NOC2L/BRPF3/GATA3/CTBP1/KMT2A/TRRAP/BAG6/SRCAP/NCOA3/WBP2/CHD5/NMT1/TGFB1/JADE1/ELP3/PPARGC1A/MSL3/TAF12/BRD8/PARK7/MCRS1/MDH2/KAT6A/TAF9B/HCFC1/IWS1/RUVBL1/YEATS2/RUVBL2/GTF3C4/DMAP1/APBB…	156
GO:0071453	cellular response to oxygen levels	biological process	156/9065	217/17381	1.85035e-09	1.22706e-07	8.83228e-08	1.37839	GATA6/E2F1/FOXO3/IRAK1/DNMT3A/BCL2/DNMT3B/FOXO1/VEGFA/EP300/PRKCE/CCNA2/CREBBP/BACH1/HMOX1/EDN1/FAS/TP53/BMP7/HIF1A/CUL2/PPARG/SIRT1/SLC2A4/PTGS2/EGLN2/SLC8A1/NOTCH1/PMAIP1/AKT1/MDM2/LPAR1/HYOU1/TERT/EGLN3/PSMD9/PRKAA1/HIF1AN/NOP53/ATP6V1A/SLC29A1/HIGD1A/GNB1/HIF3A/PSME1/HP1BP3/CCNB1/SRC/CAV1/ATG7/CHCHD2/MYC/UBA52/PSMD3/UBB/HIPK2/PSMB2/MTOR/OPRD1/PSMD4/PSMD11/ENO1/ATP6AP1/LIMD1/PSMC1/PPARGC1A/PSM…	156
GO:0060070	canonical Wnt signaling pathway	biological process	208/9065	302/17381	1.92142e-09	1.26424e-07	9.09989e-08	1.32058	WNT3A/CDC42/CCND1/FOXO3/FOXO1/RARG/KLF4/CDK14/LRP4/CYLD/COL1A1/NFKB1/WNT9B/DVL2/SOX2/SOX9/HDAC1/IGFBP2/XIAP/ILK/FGF9/NOTCH1/SDC1/RAB5A/LRRK2/SNAI2/DDX3X/LEF1/ASPM/SULF2/WWTR1/BTRC/SOX4/PSMD9/STK11/TCF7L1/WNT5A/CSNK1A1/TMEM64/FGFR2/WLS/JUP/DKK1/EMD/TRPM4/CTDNEP1/PSME1/FOLR1/GATA3/UBR5/G3BP1/CDH2/SRC/LGR4/CAV1/AXIN1/BCL9L/MYC/UBA52/ZNF703/PSMD3/UBB/CCAR2/BAMBI/PPP1CA/PSMB2/TMEM131L/TNKS/FRZB/DVL1/C…	208
GO:0007178	transmembrane receptor protein serine/threonine kinase signaling pathway	biological process	220/9065	322/17381	2.01729e-09	1.31702e-07	9.47986e-08	1.31001	HES1/ACVR1/NLK/GATA6/TGIF2/GATA4/IRAK1/PDCD4/HSPA1A/JUN/PPM1A/THBS1/SNX6/TTK/CYR61/FSTL1/ZEB1/CHST11/DDX5/ARHGEF18/HNF4A/PTK2/LRP4/KLF10/CDKN1C/FERMT2/ACVR1C/BMP7/SMAD4/MAPK3/CREB1/ACVR2B/SIRT1/XIAP/ILK/FGF9/TGFBR2/NOTCH1/FOS/PTPRK/DNM2/BMPR2/SMAD5/RUNX2/ADAM9/SMAD2/RHOA/TGFBR1/PRDM16/RGMB/DLX1/LEF1/ATOH8/HSP90AB1/TGFBR3/WWTR1/STK11/SPART/MTMR4/ACVR2A/WNT5A/CGN/RNF111/FBN1/AKAP4/DKK1/CD109/LNPEP/…	220
GO:0003002	regionalization	biological process	226/9065	332/17381	2.03535e-09	1.31859e-07	9.49114e-08	1.3052	MEF2C/BMI1/HES1/ACVR1/CDX2/WNT3A/GATA4/ZEB2/WT1/HOXA5/MAFB/RARG/NRP1/HOXD10/SUFU/HOXB8/CHSY1/HOXA7/HOXD8/HOXC8/ATM/EGR2/FGFR1/EP300/IFT52/LRP4/HOXB7/MEOX2/ETS2/DVL2/EDN1/HOXA10/SRF/RNF2/CRKL/SMAD4/PTCH1/ACVR2B/TRA2B/NOTCH1/PAX6/BMPR2/SMAD2/TGFBR1/DLX1/BASP1/LEF1/SIX1/TMED2/HOXC4/HOXA3/HHEX/HOXB5/ACVR2A/WNT5A/FRS2/FGFR2/WLS/DKK1/KAT2A/GLI2/PKD1L1/KDM2B/NBL1/FOXN4/POFUT1/AXIN1/HOXC11/KMT2A/PBX3/HIP…	226
GO:0044843	cell cycle G1/S phase transition	biological process	197/9065	284/17381	2.05232e-09	1.31921e-07	9.49562e-08	1.33001	ACVR1/CDC25A/CCND2/PLK2/CCND1/CDKN1A/E2F1/WEE1/ANXA1/BCL2/CENPJ/PRIM1/CCNE1/CDK6/CCNE2/POLA2/IQGAP3/EGFR/E2F6/ATM/PIAS1/EP300/EZH2/FBXW7/CNOT6/CCNA2/CDK10/BACH1/CDKN1B/CDKN3/TP53/CUL2/BRD7/CDKN2A/RB1/TP73/AKT1/MDM2/PDPN/DDX3X/CDK4/BAX/GADD45A/RRM2/POLA1/ORC6/MCM3/MCM10/DHFRP1/TERT/CTDSP2/MAX/CDK1/TYMS/POLE/MCM5/MCM7/CDC6/FBXO5/PCNA/RCC1/CDT1/KANK2/MCM8/POLE2/MCM6/MCM4/SOX4/NACC2/RPA2/TNKS1BP1/KLF…	197
GO:0032868	response to insulin	biological process	175/9065	248/17381	2.08086e-09	1.31921e-07	9.49562e-08	1.35299	UCP2/AKT2/TLR2/RNASEL/CCND3/PAK1/FOXO1/GRB2/ATP6V0A1/PKM/EGR2/INPPL1/ATP6V1B2/PIK3R2/IRS1/IGF1R/PPARA/IGF2/ACVR1C/PPARG/SIRT1/ERRFI1/SLC2A4/AKT1/FABP3/CDK4/SESN2/MAX/IL6/NDEL1/PRKAA1/ATP6V1C1/PDE3B/GRB10/SHC1/SRSF6/RAB31/GSTP1/SRSF4/ATP6V1A/SMARCC1/STXBP3/HADH/ATP6V1E1/PTPN1/SRSF5/CCL2/SRC/RAB10/SP1/EPM2AIP1/PHIP/EIF4EBP2/PDPK1/SREBF1/IRS4/MTOR/TSC2/GSK3A/XBP1/ATP6AP1/BAIAP2/UCP3/FER/PTPN11/ATP6V…	175
GO:0003007	heart morphogenesis	biological process	167/9065	235/17381	2.0833e-09	1.31921e-07	9.49562e-08	1.36256	MEF2C/HES1/ACVR1/GATA6/WNT3A/GATA4/PDCD4/JUN/TPM1/NRP1/NOTCH2/ARID2/CYR61/HAND2/SUFU/MED1/VEGFA/IFT52/PTK2/PIM1/ZFPM2/DVL2/JAG1/BMP7/HIF1A/SRF/SMAD4/SOX9/PTCH1/ILK/TGFBR2/TEK/NOTCH1/BMPR2/SNAI2/MDM2/TGFBR1/NIPBL/NSD2/TGFBR3/SIX1/TMED2/ERG/NRP2/SOX4/HEG1/WNT5A/DLC1/FGFR2/GNG5/DKK1/PARVA/ACTC1/FOLR1/GATA3/FOXN4/HAND1/MTOR/TBX1/PKP2/COL5A1/GSK3A/CTNNB1/TGFB1/TBX2/BMPR1A/PLXND1/FOXC1/ALDH1A2/TEAD2/SM…	167
GO:0007568	aging	biological process	203/9065	294/17381	2.15682e-09	1.35416e-07	9.74713e-08	1.3239	KRAS/UCP2/CDKN1A/CHEK1/FOXO3/IRAK1/DNMT3A/PDCD4/BCL2/JUN/MSH2/CDK6/SOD1/SOD2/LRP1/GRB2/PICALM/CTSC/BRCA2/CASP9/PITX3/SERP1/ATM/MAP2K1/HMGA2/APP/VCAM1/NEK4/CDKN1C/EDN1/HRAS/TP53/SRF/CREB1/SERPINE1/SIRT1/CDKN2A/IGFBP2/IGFBP5/ILK/PTGS2/TIMP2/HMGA1/TGFBR2/CTGF/STAT3/FOS/AKT1/LRRK2/MMP7/LIMS1/NFKB2/GJB2/TERT/PRNP/CDK1/MSH6/TYMS/HMGCR/IL6/PPP1R9A/NUP62/NUAK1/ITGB2/BGLAP/BCL2A1/SIN3A/CALR/DKK1/RGN/MME/C…	203
GO:0051656	establishment of organelle localization	biological process	296/9065	450/17381	2.17064e-09	1.35416e-07	9.74713e-08	1.26121	WNT3A/CDC42/KIF23/RHOT1/SEC23IP/GAK/CTSC/AP3D1/AP3B1/TRAPPC3/ATM/USO1/PTK2/P2RX7/HMOX1/SNAPIN/HNRNPU/KIF22/HIF1A/SCRIB/PIK3CG/PAX6/RAP1A/YWHAZ/RAB5A/DNM2/LRRK2/SYNE2/XPO1/PSRC1/NDC80/SEC31A/NMD3/CENPQ/GBF1/CDCA5/VAMP8/CDT1/TMED2/SEC23A/RAC2/ESPL1/KIF1B/SPIRE1/SUN2/HHEX/NDEL1/RAB1B/PPP6R3/SYBU/MREG/FYCO1/TRAPPC10/RAN/RIMS3/NUP62/RAB11A/RIMS4/KIT/RAB6A/SYT12/STON2/SPRY2/MOBP/RIMS2/RAP1B/KIF5B/UNC13…	296
GO:0050821	protein stabilization	biological process	116/9065	154/17381	2.52306e-09	1.56244e-07	1.12463e-07	1.44426	NLK/CDKN1A/CREBL2/HSPA1A/PPIB/GOLGA7/IGF1/HPS4/EP300/FBXW7/HSPD1/CREB1/PFN1/TAF9/HSP90AB1/CDC37/CCT3/SOX4/EPHA4/RASSF2/USP33/FLOT2/CALR/HIST1H1B/NOP53/FLNA/PDCD10/ZNF207/TELO2/HSP90AA1/ATP1B3/BAG6/PTGES3/HSPA1B/DVL1/CCT5/GAPDH/CDC37L1/P3H1/GTPBP4/PPARGC1A/NPM1/CCT7/PARK7/CCT4/CCT2/TSC1/SMAD3/TAF9B/PTEN/HCFC1/PHB2/CCT6A/SMO/TCP1/NAPG/HYPK/RPL5/RPS7/USP19/FLOT1/DNLZ/MORC3/SYVN1/STK3/WNT10B/EFNA1/OT…	116
GO:0050673	epithelial cell proliferation	biological process	243/9065	361/17381	2.5937e-09	1.59446e-07	1.14768e-07	1.29064	MEF2C/HES1/WNT3A/CDC42/CCND1/ESR1/RIDA/JUN/CDK6/HOXA5/BCL2L2/THBS1/NRP1/IQGAP3/EGFR/IGF1/BRCA2/GJA1/SERPINB5/MAP2K1/MED1/RUNX3/VEGFA/IFT52/FBXW7/FGF2/HMGN1/PRKD2/HPN/CDKN1C/HMOX1/CDKN1B/SOX2/NF1/HRAS/ERBB2/HIF1A/FGF7/SOX9/PTCH1/MTSS1/SIRT1/MAPK1/KDR/RB1/ERRFI1/IGFBP5/EGFL7/FGF9/TEK/KLF9/IFNG/NOTCH1/PAX6/STAT3/LAMC1/PTPRK/BMPR2/AKT1/SNAI2/TGFBR1/CXCL12/CEBPB/BAX/EPPK1/HMGB1/ATOH8/EPHA2/TGFBR3/SIX1…	243
GO:0071897	DNA biosynthetic process	biological process	150/9065	208/17381	2.64051e-09	1.61148e-07	1.15993e-07	1.38272	CDKN1A/RAD51C/POLA2/BRCA2/BRCA1/GJA1/ATM/KLF4/RAD51/PRIMPOL/HNRNPD/PRKD2/HNRNPU/TP53/PPARG/MAPK3/SIRT1/MAPK1/CTGF/BMPR2/RFC5/BARD1/EXO1/RFC4/TK1/HSP90AB1/TERT/POLQ/POLD1/CHTF18/PCLAF/DSCC1/TYMS/POLE/PCNA/POLE2/BLM/CCT3/RPA2/TNKS1BP1/SPRTN/ISG15/MRE11/CHRAC1/RGN/CENPF/RFC2/PPIA/HNRNPA1/SRC/MYC/UBA52/HSP90AA1/UBB/TNKS/HNRNPC/PTGES3/POLD3/CTNNB1/USP10/WRAP53/CCT5/NOP10/SMG5/CTC1/CCT7/EXOSC10/CCT4/CC…	150
GO:0033157	regulation of intracellular protein transport	biological process	256/9065	383/17381	2.76244e-09	1.67376e-07	1.20476e-07	1.28159	HES1/WNT3A/CDC42/AKT2/TLR2/CDKN1A/BAP1/PPM1A/PAK1/F2/EGFR/ANP32B/IGF1/TMSB4X/SUFU/HPS4/UHMK1/KCNE1/MED1/FAF1/MAPK7/FBXW7/PIK3R2/APP/CYLD/NF1/TP53/ERBB2/ERBB4/BMP7/SMAD4/SIRT1/MAPK1/TLR4/NFKBIA/PTGS2/IFNG/LRRK2/SNAI2/MDM2/RHOA/TGFBR1/DNAJC27/BARD1/PCNT/XPO1/NUCB1/NUP58/STARD7/HHAT/ECT2/HSP90AB1/PRNP/FAM20B/CDK1/NLRP3/CDH1/SULF2/WWTR1/RAC2/SOX4/IL6/NDEL1/NUP62/NKAP/IFI27/TCTEX1D2/DMTN/JUP/KIF5B/SH3…	256
GO:0051402	neuron apoptotic process	biological process	158/9065	221/17381	2.8016e-09	1.68537e-07	1.21312e-07	1.37079	MEF2C/MYB/KRAS/CDC42/AKT2/FADD/FOXO3/HDAC4/BCL2/JUN/MCL1/MSH2/ROCK1/SOD1/SOD2/SET/LRP1/NRP1/FGF20/CASP9/PITX3/TRIM2/AXL/BDNF/G6PD/ATM/ERBB3/FBXW7/MECP2/APP/SIGMAR1/HMOX1/NF1/FAS/HRAS/TP53/MAP3K11/SIAH1/HIF1A/BCL2L11/NTRK2/RB1/ILK/EGLN2/TP73/NTF3/CEBPB/BAX/DLX1/HYOU1/HSP90AB1/TERT/PRNP/TNFRSF21/MAX/SIX1/SIX4/EGLN3/ADARB1/PIGT/ITGA1/GATA3/KDM2B/CCL2/NR4A3/EPHA7/ATN1/HIPK2/GPI/EN2/PDPK1/AARS/NONO/BR…	158
GO:0031056	regulation of histone modification	biological process	101/9065	131/17381	3.03383e-09	1.81212e-07	1.30435e-07	1.47828	DNMT1/MYB/CDK9/CHEK1/DNMT3B/SET/BRCA1/ATM/VEGFA/MECP2/PRKD2/LIF/RPS6KA5/IGF2/TP53/SPI1/SMAD4/MAPK3/BRD7/SIRT1/OTUB1/LRRK2/SNAI2/MAPK8/NIPBL/PHF19/JARID2/SIN3A/HIST1H1B/PAXBP1/KAT2A/SMARCB1/MYOCD/NOC2L/GATA3/CTBP1/UBR5/CCNB1/KMT2A/SKI/SREBF1/WBP2/UBE2N/CTNNB1/TGFB1/NELFE/ATRX/PPARGC1A/RIF1/BCOR/KDM3A/AKAP8/IWS1/TRIP12/CHTOP/RUVBL2/RNF40/SART3/AKAP8L/TADA3/ARRB1/NSD1/SETD7/BCL6/SETD5/FMR1/OGT/KDM5A…	101
GO:0016197	endosomal transport	biological process	186/9065	267/17381	3.38739e-09	2.00905e-07	1.44611e-07	1.3357	CDX2/RAB9B/RAB21/TOM1/RHOB/SNX6/PICALM/AP3D1/INPP5F/MAP2K1/ALMS1/EHD2/SNX1/HGS/SNAPIN/MON2/MAPK3/MAPK1/MSN/SCRIB/RAB5A/LRRK2/FAM109B/NSG1/AP5M1/GBF1/SNX9/RAB14/SNX12/ANKFY1/ARL1/TSG101/ARHGAP1/RAB12/KLHL20/TRAPPC10/AP1G1/RAB11A/HMGXB4/RAB6A/CD63/VPS53/HOOK1/TMEM87A/DPY30/AP1S1/AP1M1/CLTC/CHMP2A/VAMP7/SRC/RAB10/RAB29/ERC1/ARF1/UBA52/FAM160A2/UBB/RAB35/STAM2/PIKFYVE/UBE2O/VPS37C/MGRN1/STX16/VPS4A/T…	186
GO:0043254	regulation of protein complex assembly	biological process	261/9065	392/17381	3.42744e-09	2.0186e-07	1.45297e-07	1.27662	STMN1/MET/CDC42/ESR1/GTF2H1/HSPA1A/JUN/PPM1A/PAK1/GRB2/CAND1/TMSB4X/MITF/PLEKHG2/PREX1/FAF1/VEGFA/FSCN1/PRKCE/MECP2/CDKN1B/TWF1/TWF2/FAS/TP53/SRF/CREB1/PIEZO1/BCL2L11/MSN/TLR4/IFNG/PMAIP1/MAPRE1/PFN1/DDX3X/BAX/HMGB1/PSRC1/VASP/DDB1/CDC42EP4/TMC8/ABI2/CDT1/SNX9/SPIRE1/RPA2/CLIP1/CAPZB/PPP1R9A/BBS10/FNIP1/CAPZA1/ARPC5/CUL4B/DMTN/DKK1/RALB/NOP53/EIF4G1/TRIM9/AIM2/RHOC/LCP1/CTTN/CAPG/TMOD3/HIST3H3/TB…	261
GO:0016072	rRNA metabolic process	biological process	201/9065	292/17381	3.8504e-09	2.25195e-07	1.62094e-07	1.31984	RNASEL/PA2G4/NSUN4/GEMIN4/SIRT1/NSUN5/MRPS9/DDX21/BMT2/WDR37/TSR1/SAMD15/GTF3C6/NIFK/NOP53/FRG1/DROSHA/SMARCB1/RPP40/RRP36/ISG20/DIEXF/ABT1/RPUSD2/UTP20/RPS8/RPS2/PDCD11/UBA52/XRN2/RPL36A/GTF3C1/RPL29/WDR46/RPL18A/NOP2/RPL3/RPS6/MTOR/RPL4/RPLP1/RPS14/PELP1/RPL7A/RPL10/DDX11/DDX17/RPL18/NOL9/RPL37/NCL/RPL13/UTP4/PWP2/RRP1B/RRP7A/RPS27/RPL8/RPS15A/RPS5/RPL10A/NOP10/SMARCA4/MRPS11/RPS18/RPS10/SPIN1/…	201
GO:0051170	nuclear import	biological process	204/9065	297/17381	3.91091e-09	2.256e-07	1.62386e-07	1.31698	DRD1/HES1/WNT3A/TLR2/CDKN1A/GEMIN2/JUN/PPM1A/POLA2/F2/EGFR/IGF1/TMSB4X/SUFU/POM121/RERE/MED1/FAF1/MAPK7/PIK3R2/APP/CYLD/NF1/ERBB4/GEMIN4/BMP7/SMAD4/SIRT1/MAPK1/TLR4/NFKBIA/PTGS2/FGF9/IFNG/STAT3/AKT1/LRRK2/SNAI2/RHOA/TGFBR1/NUP58/ECT2/HSP90AB1/CDK1/KPNA2/NLRP3/CDH1/SULF2/WWTR1/TNPO2/GPN1/IL6/RAN/NUP62/SEC61B/JUP/G3BP2/IPO8/EMD/NUP50/PDIA3/POM121C/FLNA/PRKAG1/SRI/CCDC22/TRPS1/IPO9/HNRNPA1/UBR5/KPNA…	204
GO:0098813	nuclear chromosome segregation	biological process	204/9065	297/17381	3.91091e-09	2.256e-07	1.62386e-07	1.31698	CDC42/CDC14A/KIF23/CDC14B/RAD51C/CCNE1/CCNE2/TTK/ATM/FBXW7/KIF2A/HNRNPU/KIF22/RB1/MAPRE1/NSL1/NDC1/NIPBL/SGO1/HASPIN/XPO1/CENPU/UBE2C/KNTC1/RACGAP1/PSRC1/TRIP13/NDC80/DSN1/ECT2/NCAPG/SKA1/CDC20/BUB1B/NCAPH/CENPQ/DSCC1/TOP2A/FANCM/CDCA5/NCAPD2/CDC6/CDT1/SPC25/TACC3/ZWINT/FANCD2/ESPL1/FEN1/DYNLL2/NDEL1/POGZ/CLIP1/CKAP5/TEX15/NUP62/RAB11A/RCC2/SPC24/CHAMP1/DYNC1LI1/MRE11/MAD2L1/NCAPD3/CENPF/KIF4A/P3…	204
GO:0061008	hepaticobiliary system development	biological process	104/9065	136/17381	3.9802e-09	2.28036e-07	1.64139e-07	1.46623	HES1/GATA6/WNT3A/KRAS/UCP2/CEBPA/CCND1/ANXA1/JUN/GNPNAT1/EGFR/PKM/MED1/EZH2/FBXW7/HNRNPD/HPN/PRMT5/HMOX1/NF1/SOX9/SP3/PTCH1/SRSF1/NFKBIA/IFNG/NOTCH1/RAP1A/RB1CC1/CSNK2A1/CEBPB/NIPBL/TGFBR3/MPST/TYMS/SULF2/PCNA/EPHX1/HHEX/JARID2/HMGCS1/RGN/SRSF5/ARG1/CSNK2A2/FRZB/GFER/TGFB1/XBP1/E2F8/ALDH1A2/SMAD3/RPS6KA1/AURKA/RPL32/CEBPG/SEC63/ACAT1/HLX/WNT1/GLI1/NODAL/HFE/PIK3CA/ARID5B/ONECUT2/ARF6/DDX39B/ATP7A…	104
GO:1990778	protein localization to cell periphery	biological process	176/9065	251/17381	4.06678e-09	2.31422e-07	1.66576e-07	1.34445	WNT3A/AKT2/GOLPH3L/ROCK1/LRP1/PICALM/GOLGA7/GAK/EGFR/ANXA2/LZTFL1/LIN7C/RAB11FIP2/PRKCE/IKBKB/CSK/AGR2/EHD2/PPP2R5A/PTCH1/EPB41L3/SCRIB/IFNG/AKT1/CSNK2A1/NSG1/EPHA2/PRNP/CDH1/VAMP8/TMED2/KIF1B/GOPC/RAB34/MAP7/CLIP1/PDZD11/SLMAP/MPP5/GNAI1/RAB11A/RAB31/GOLPH3/JUP/KIF5B/FLOT2/SYTL2/PLS1/FLNA/EFR3A/RAPGEF2/PRKG2/PACS2/CLTC/ITGA3/F11R/VAMP7/CDH2/EPB41L2/RAB10/RAB29/ITGB1/CAV1/EPB41/ATP1B3/PDPK1/RACK1…	176
GO:0072599	establishment of protein localization to endoplasmic reticulum	biological process	83/9065	104/17381	4.10834e-09	2.32218e-07	1.67149e-07	1.53021	SEC61A1/SEC61B/SEC62/RAB10/RPS8/RPS2/SRP68/UBA52/RPL36A/RPL29/RPL18A/RPL3/RPS6/RPL4/RPLP1/RPS14/RPL7A/RPL10/RPL18/RPL37/RPL13/RPS27/RPL8/RPS15A/RPS5/RPL10A/SRP9/RPS18/RPS10/SRPRA/RPS3A/RPS28/RPLP0/RPS4X/RPL9/RPL23A/RPL27A/RPS3/RPL26/RPL12/RPL22/RPL31/RPL35A/RPS9/RPL34/RPS12/RPL15/RPL36/RPS21/RPL5/RPL32/RPS26/RPL14/RPS7/RPL27/RPS17/RPL13A/SEC63/RPS15/SEC61G/RPS24/RPL41/CHMP4B/SPCS3/RAB3GAP1/RPS19/…	83
GO:0034329	cell junction assembly	biological process	147/9065	204/17381	4.14779e-09	2.32884e-07	1.67629e-07	1.38164	KRT5/CDC42/BCL2/PDCD6IP/ROCK1/THBS1/NRP1/ITGB4/CORO1C/GJA1/SDC4/LAMC2/VEGFA/FSCN1/IKBKB/FN1/PTK2/TJP1/FERMT2/SRF/EPB41L3/KDR/ILK/MTDH/TEK/RAP1A/LAMC1/PTPRK/SNAI2/RHOA/LIMS1/GJB2/ACTN1/ECT2/VASP/MPP5/HEG1/CBFB/DLC1/CAPZA1/RCC2/UGT8/PARD6B/DMTN/RAP1B/ITGA6/JUP/VMP1/ACTN4/FLNA/PHLDB2/RAPGEF2/RHOC/CTTN/TBCD/F11R/ACTB/THY1/FLNC/SRC/CAV1/VCL/ZNF703/TLN1/ACTG1/PDPK1/PRKACA/PKP2/CTNNB1/PIP5K1A/CTNNA1/TSC…	147
GO:0001889	liver development	biological process	102/9065	133/17381	4.24957e-09	2.37019e-07	1.70605e-07	1.47047	HES1/GATA6/WNT3A/KRAS/UCP2/CEBPA/CCND1/ANXA1/JUN/GNPNAT1/EGFR/PKM/MED1/EZH2/FBXW7/HNRNPD/HPN/PRMT5/HMOX1/NF1/SOX9/SP3/PTCH1/SRSF1/NFKBIA/IFNG/NOTCH1/RAP1A/RB1CC1/CSNK2A1/CEBPB/TGFBR3/MPST/TYMS/SULF2/PCNA/EPHX1/HHEX/JARID2/HMGCS1/RGN/SRSF5/ARG1/CSNK2A2/FRZB/GFER/TGFB1/XBP1/E2F8/ALDH1A2/SMAD3/RPS6KA1/AURKA/RPL32/CEBPG/SEC63/ACAT1/HLX/WNT1/GLI1/NODAL/HFE/PIK3CA/ARID5B/ONECUT2/ARF6/DDX39B/ATP7A/ITGA2…	102
GO:0035148	tube formation	biological process	109/9065	144/17381	4.70523e-09	2.60707e-07	1.87655e-07	1.45135	TRAF6/ZEB2/RARG/ARID1A/SUFU/SDC4/VEGFA/IFT52/WNT9B/DVL2/BMP7/HIF1A/SOX9/PTCH1/BCL2L11/SCRIB/PODXL/NOTCH1/PFN1/ATOH8/VASP/SIX1/MTHFD1/TMED2/SOX4/SIX4/NFIB/LUZP1/WNT5A/DLC1/FGFR2/KAT2A/FOLR1/GATA3/KDM2B/PLXNB2/GLMN/HAND1/MTHFD1L/SKI/PRKACA/DVL1/TSC2/CTNNB1/TGFB1/TEAD2/TSC1/MIB1/PTK7/SEMA4C/CFL1/TCTN1/ABL1/SEC24B/RALA/GDF7/LRP2/MED12/SFRP1/STK3/SETD2/NODAL/VANGL2/FZD6/STK4/DAB2IP/SOX11/TRIM71/PRICKL…	109
GO:0006338	chromatin remodeling	biological process	123/9065	166/17381	4.82325e-09	2.655e-07	1.91105e-07	1.42071	MYB/CHEK1/HDAC4/ESR1/H3F3B/PTMA/ARID1A/ANP32B/RERE/HMGA2/MTA2/SOX9/HDAC1/CDKN2A/RB1/SMARCA2/HMGA1/MIS18BP1/RBBP7/OIP5/CENPU/HELLS/CENPQ/CHD4/RSF1/BAHD1/KDM6B/SMARCA1/KAT2A/HDAC2/SMARCC1/CHRAC1/BRDT/SMARCB1/GATA3/ACTB/ANP32E/CBX3/SMARCAD1/SATB2/MYC/SMARCD1/GATAD2B/HNRNPC/CHD5/CTNNB1/TNRC18/BPTF/SCMH1/SMYD1/ATRX/SMARCA4/CHD1/HIST2H4B/MSL3/NPM1/HIST1H4E/ARID1B/SUPT5H/SMARCC2/BAZ1B/RUVBL1/SMARCA5/RUV…	123
GO:0000077	DNA damage checkpoint	biological process	116/9065	0.0592654	4.88556e-09	2.67183e-07	1.92317e-07	1.43494	PLK2/CCND1/CDKN1A/E2F1/CHEK1/CDC14B/CENPJ/CEP63/MSH2/BRCA1/ATM/EP300/HMGA2/CNOT6/PEA15/CDKN1B/CLOCK/TP53/TP73/MDM2/BAX/GADD45A/DONSON/FANCI/CDK1/PCNA/BLM/SOX4/RPA2/TNKS1BP1/CNOT4/ZNF385A/MDC1/MRE11/NOP53/SFN/CCNB1/RAD9A/UBA52/UBB/CCAR2/CNOT1/FZR1/GIGYF2/CDC5L/PTPN11/E2F8/PLK1/NPM1/CASP2/FBXO31/FOXN3/ORAOV1/CNOT8/CNOT9/BRCC3/TAOK3/PRPF19/RPL26/CUL4A/MAPKAPK2/UBC/TAOK2/BRIP1/PRMT1/AURKA/FEM1B/THOC5…	116
GO:0038127	ERBB signaling pathway	biological process	114/9065	152/17381	5.34065e-09	2.86959e-07	2.06551e-07	1.43803	PTPN12/KRAS/CDC42/GRB2/SNX6/EGFR/ERBB3/FBXW7/APP/CSK/PTK2/AGR2/RPS6KA5/HGS/HRAS/ERBB2/ERBB4/SOX9/MAPK1/ERRFI1/CPNE3/AKT1/CDC37/SOCS4/TSG101/ERBIN/RASSF2/SHC1/NUP62/PTPRR/SPRY2/SH3TC2/BTC/ITGA1/CDH13/SRC/UBA52/HSP90AA1/UBB/STAM2/EPN1/PDPK1/TGFB1/FER/PTPN11/GAB1/CNOT9/RNF115/PRKCA/IQGAP1/UBC/SPRY1/RAB7A/NEURL1/ABL1/GAREM1/PIK3C2A/CBL/PIK3CA/CUL5/PTPRJ/DAB2IP/RBPJ/GPRC5A/SOCS5/CAMLG/PIK3R1/STAM/EREG…	114
GO:0001655	urogenital system development	biological process	215/9065	316/17381	5.34219e-09	2.86959e-07	2.06551e-07	1.30454	MEF2C/HES1/NOTCH3/PLAG1/ESR1/ANXA1/BCL2/WT1/RIDA/RARG/NRP1/ITGB4/SERPINB5/SDC4/FGFR1/VEGFA/NFIA/FGF2/LRP4/HOXB7/CDKN1C/LIF/WNK4/WNT9B/CDKN1B/JAG1/NF1/BMP7/SMAD4/SOX9/PDGFRA/PTCH1/MTSS1/ACVR2B/BCL2L11/ILK/PODXL/TEK/TP73/IFNG/NOTCH1/SDC1/SMAD5/LRRK2/SMAD2/TGFBR1/NIPBL/BAX/BASP1/SIX1/MPST/SULF2/WWTR1/SEC61A1/SOX4/EPHA4/SIX4/STK11/PSAP/WNT5A/FRS2/STAT1/FBN1/FGFR2/ITGA6/KLHL3/SMARCC1/RGN/CENPF/MME/MYO…	215
GO:0043903	regulation of symbiosis, encompassing mutualism through parasitism	biological process	156/9065	219/17381	5.35349e-09	2.86959e-07	2.06551e-07	1.3658	CDK9/BCL2/JUN/RNASEL/HACD3/PPIB/ANXA2/POLR2K/DDX5/NELFCD/ADAR/EP300/HMGA2/HPN/CXCL8/HDAC1/BCL2L11/IFNG/NOTCH1/IFITM1/PFN1/POLR2D/VAPA/DDX3X/FAM111A/LEF1/DDB1/TOP2A/RSF1/ADARB1/TSG101/TRIM59/TARDBP/RSAD2/STAT1/IFIT1/ISG15/IFITM3/OASL/IFIT5/SLPI/LGALS1/F2RL1/TRIM26/EXOC2/NR5A2/PDE12/SMARCB1/POLR2I/PPIA/CHMP2A/ISG20/ARG1/SMC3/ITGAV/SP1/CAV1/LARP1/POLR2A/POLR2L/TRIM28/PABPC1/NELFE/RRP1B/VPS4A/POLR2B/…	156
GO:0045732	positive regulation of protein catabolic process	biological process	186/9065	268/17381	5.38345e-09	2.86959e-07	2.06551e-07	1.33072	PLK2/CEBPA/HSPA1A/FOXO1/LRP1/CTSC/GJA1/OSBPL7/RNF138/ANKIB1/PIAS1/FBXW7/ANAPC16/PTK2/SNX1/CDKN1B/SOX9/MSN/EGLN2/IFNG/TRIB2/LDLR/AKT1/LRRK2/CSNK2A1/MDM2/ADAM9/BARD1/UBE2C/CDC20/BUB1B/DDB1/CDK1/FBXO5/SNX9/LPCAT1/BTRC/PSMD9/FBXL5/SOCS4/RNF41/WNT5A/CSNK1A1/CUL4B/MAD2L1/NOP53/RGN/CCDC22/PACSIN3/PSME1/CCNB1/GGA3/CAV1/AXIN1/ATG7/UBA52/PSMD3/UBB/BAG6/PSMB2/RACK1/ANAPC1/DVL1/GSK3A/PSMD4/FZR1/PSMD11/XBP1/R…	186
GO:0001654	eye development	biological process	231/9065	343/17381	5.96152e-09	3.15773e-07	2.27291e-07	1.29129	NTRK3/TGIF2/ATF6/ZEB2/BCL2/WT1/JUN/CACNA1C/RARG/NRP1/GPD2/EGFR/ARID1A/SH3PXD2B/ZNF513/ZEB1/PITX3/KLF4/MED1/VEGFA/HMGN1/CDKN1C/WNT9B/CDKN1B/SOX2/JAG1/NF1/BMP7/HIF1A/SRF/SOX9/PDGFRA/SP3/ACVR2B/HDAC1/NTRK2/MERTK/FGF9/TGFBR2/PAX6/STAT3/BMPR2/FOXF2/TGFBR1/NIPBL/CDK4/BAX/DLX1/HMGB1/EPHA2/MAX/CLIC4/NF2/LPCAT1/PAPD4/BCL11B/WNT5A/FRS2/FBN1/ABCB5/ATP2B4/C12orf57/HDAC2/CRYGS/MFN2/GNB1/GNAT2/GATA3/KDM2B/FOXN…	231
GO:0010948	negative regulation of cell cycle process	biological process	222/9065	328/17381	6.10167e-09	3.19182e-07	2.29745e-07	1.29774	BMI1/PLK2/CDK9/CCND1/CDKN1A/E2F1/CCNF/CHEK1/BCL2/CENPJ/MSH2/EHMT2/EHMT1/TTK/BRCA1/E2F6/ATM/EP300/HMGA2/EZH2/RAD51/FBXW7/CNOT6/LIF/CDKN1B/TP53/BMP7/RNF2/BRD7/RB1/TP73/MDM2/ZFP36L2/RBBP7/CDK4/BAX/GADD45A/RRM2/DONSON/FANCI/TRIP13/NDC80/HSP90AB1/BUB1B/CTDSP2/MAX/CDK1/TICRR/FBXO5/PCNA/CDT1/KANK2/BLM/ESPL1/SOX4/NACC2/RPA2/TNKS1BP1/PSMD9/EPC1/CNOT4/TOM1L2/ZNF385A/CBX5/CALR/DYNC1LI1/MRE11/MAD2L1/NOP53/CE…	222
GO:0017038	protein import	biological process	222/9065	328/17381	6.10167e-09	3.19182e-07	2.29745e-07	1.29774	DRD1/HES1/WNT3A/TLR2/CDKN1A/JUN/PPM1A/POLA2/F2/EGFR/IGF1/TMSB4X/SUFU/POM121/RERE/MED1/FAF1/MAPK7/PEX13/PIK3R2/APP/HSPD1/HSPA4/CYLD/NF1/ERBB4/BMP7/SMAD4/SIRT1/MAPK1/TLR4/NFKBIA/PTGS2/FGF9/IFNG/STAT3/AKT1/LRRK2/SNAI2/RHOA/TGFBR1/NUP58/ECT2/HSP90AB1/TIMM50/CDK1/KPNA2/NLRP3/CDH1/SULF2/WWTR1/TNPO2/GPN1/IL6/RAN/NUP62/SEC61B/JUP/G3BP2/IPO8/EMD/NUP50/PDIA3/POM121C/FLNA/SRI/CCDC22/TRPS1/IPO9/UBR5/KPNA5/TI…	222
GO:0007569	cell aging	biological process	80/9065	100/17381	6.35814e-09	3.28517e-07	2.36464e-07	1.5339	KRAS/CDKN1A/CHEK1/PDCD4/BCL2/CDK6/SOD1/BRCA2/ATM/MAP2K1/HMGA2/NEK4/HRAS/TP53/SRF/SERPINE1/SIRT1/CDKN2A/ILK/HMGA1/LIMS1/TERT/CDK1/NUP62/NUAK1/BGLAP/CALR/MME/BCL2L12/MTOR/MIF/FZR1/TBX2/ULK3/BMPR1A/CTC1/NPM1/DNAJA3/KAT6A/RSL1D1/PTEN/MNT/ABL1/FOXM1/MORC3/ZNF354A/WNT1/BCL6/ICAM1/PRKCD/ID2/CHEK2/MAPKAPK5/PRELP/ERCC1/WRN/VASH1/TWIST1/SMC5/H2AFX/ENG/ARNTL/PAWR/ZNF277/MAPK14/PRMT6/RWDD1/PNPT1/TERF2/ROMO1/…	80
GO:0045047	protein targeting to ER	biological process	80/9065	100/17381	6.35814e-09	3.28517e-07	2.36464e-07	1.5339	SEC61A1/SEC61B/SEC62/RPS8/RPS2/SRP68/UBA52/RPL36A/RPL29/RPL18A/RPL3/RPS6/RPL4/RPLP1/RPS14/RPL7A/RPL10/RPL18/RPL37/RPL13/RPS27/RPL8/RPS15A/RPS5/RPL10A/SRP9/RPS18/RPS10/SRPRA/RPS3A/RPS28/RPLP0/RPS4X/RPL9/RPL23A/RPL27A/RPS3/RPL26/RPL12/RPL22/RPL31/RPL35A/RPS9/RPL34/RPS12/RPL15/RPL36/RPS21/RPL5/RPL32/RPS26/RPL14/RPS7/RPL27/RPS17/RPL13A/SEC63/RPS15/SEC61G/RPS24/RPL41/CHMP4B/SPCS3/RPS19/RPL30/SRP14/RPS…	80
GO:0007051	spindle organization	biological process	117/9065	157/17381	6.4421e-09	3.30825e-07	2.38126e-07	1.42887	STMN1/PLK2/CDC14A/KIF23/CDC14B/CEP63/HSPA1A/TTK/CCSAP/KIF2A/MECP2/HNRNPU/UVRAG/RHOA/PCNT/RACGAP1/PSRC1/NDC80/AUNIP/KIF11/CDC20/ASPM/WDR62/FBXO5/RCC1/BORA/HAUS8/SPC25/TACC3/ESPL1/SUN2/CKAP5/RAN/GNAI1/NUP62/RAB11A/FLNA/KIF4A/ZNF207/CLTC/CHMP2A/CCNB1/CEP120/SMC3/TUBB/TNKS/HSPA1B/KPNB1/SMC1A/DYNC1H1/RANBP3/ATRX/PLK1/RANBP2/MAP4/RPS3/TUBGCP6/STAG2/TPX2/MYH9/TUBG1/TPR/AURKA/EZR/CEP192/NEK7/AURKB/HAUS6/…	117
GO:0060541	respiratory system development	biological process	142/9065	197/17381	7.33138e-09	3.74212e-07	2.69355e-07	1.38207	HES1/GATA6/KRAS/CDC42/CEBPA/WT1/RIDA/HOXA5/RARG/EGFR/MAP2K1/FGFR1/VEGFA/EP300/AGR2/LIF/ZFPM2/FGF7/SRF/SOX9/MAPK3/PDGFRA/SP3/CREB1/ACVR2B/MAPK1/ERRFI1/IGFBP5/FGF9/TGFBR2/NOTCH1/CTGF/BMPR2/PDPN/SMAD2/BASP1/AIMP2/HMGB1/LEF1/SIX1/MYCN/HHEX/SIX4/NFIB/HEG1/SRSF6/WNT5A/PGR/SPRY2/FGFR2/EIF4E/MYOCD/GLI2/ITGA3/ARG1/STK40/RDH10/AXIN1/TIMELESS/PLOD3/BAG6/SKI/SREBF1/CTNNB1/LIPA/BMPR1A/SMCHD1/ALDH1A2/PTK7/ASXL…	142
GO:0006473	protein acetylation	biological process	132/9065	181/17381	7.39621e-09	3.75246e-07	2.701e-07	1.39831	CHEK1/FOXO1/SET/BRCA2/BRCA1/EP300/MECP2/PHF20/LIF/RPS6KA5/CREBBP/CLOCK/SPI1/SMAD4/MAPK3/BRD7/SIRT1/SNAI2/TAF9/JADE3/LEF1/DSCC1/SOX4/NAA30/KANSL1/EPC1/BRD1/SIN3A/KAT2A/HDAC2/HINT2/SMARCB1/MYOCD/NOC2L/BRPF3/GATA3/CTBP1/KMT2A/TRRAP/BAG6/SRCAP/NCOA3/WBP2/CHD5/TGFB1/JADE1/ELP3/PPARGC1A/MSL3/TAF12/BRD8/PARK7/MCRS1/MDH2/KAT6A/TAF9B/HCFC1/IWS1/RUVBL1/YEATS2/RUVBL2/GTF3C4/DMAP1/APBB1/BRPF1/EP400/ING3/USP2…	132
GO:0042063	gliogenesis	biological process	177/9065	254/17381	7.76851e-09	3.91775e-07	2.81997e-07	1.33612	CXCR4/DRD1/NTRK3/HES1/MYB/KRAS/AKT2/TLR2/PLAG1/ANXA1/SLC45A3/CDK6/SOD1/LRP1/F2/EGFR/PITX3/CERS2/SOX6/EGR2/MAP2K1/ERBB3/EZH2/APP/CSK/WASF3/LIF/PRMT5/CSF1/SOX2/NF1/DICER1/ERBB2/PPARG/SOX9/MAPK3/CREB1/MAPK1/NTRK2/SCRIB/TLR4/SRSF1/ILK/TP73/IFNG/NOTCH1/PAX6/STAT3/LDLR/AKT1/LPAR1/DLX1/SYNE2/LEF1/TERT/TNFRSF21/ZNF365/CDK1/APCDD1/NF2/MYCN/SOX4/SUN2/EPHA4/NFIB/MPP5/GSTP1/DTX1/SH3TC2/HDAC2/GPC1/NAB1/CCL2/C…	177
GO:0097193	intrinsic apoptotic signaling pathway	biological process	200/9065	292/17381	7.9206e-09	3.97067e-07	2.85807e-07	1.31327	S100A9/CDKN1A/E2F1/BCL2/HSPA1A/MCL1/MSH2/SOD1/SOD2/BCL2L2/BRCA2/BRCA1/CASP9/DDX5/ATM/ITPR1/EP300/MAPK7/FBXW7/CYLD/PRODH/HMOX1/HRAS/TP53/SIAH1/HIF1A/CUL2/SIRT1/FHIT/BCL2L11/IKBKE/BBC3/PTGS2/CD44/TP73/PMAIP1/AKT1/LRRK2/SNAI2/MDM2/CXCL12/TAF9/CEBPB/DDX3X/BAX/HYOU1/EPHA2/MELK/MSH6/E2F2/NACC2/STK11/TMEM109/SERINC3/SGMS1/ZNF385A/AEN/BCL2A1/STK24/BAG5/PDCD10/ZNF622/DNAJC10/NOC2L/PTPN1/SFN/SRC/CYCS/RAD9A…	200
GO:0010770	positive regulation of cell morphogenesis involved in differentiation	biological process	104/9065	137/17381	8.05685e-09	3.99819e-07	2.87787e-07	1.45553	NTRK3/WNT3A/CDC42/ZEB2/RAB21/PAK1/NRP1/SHTN1/PREX1/BDNF/CRK/MAP2K1/VEGFA/FN1/ARHGDIA/TWF2/SRF/CRKL/NTRK2/ILK/DNM2/BMPR2/RHOA/CXCL12/LIMS1/PLXNC1/ITPKA/EPHA4/NDEL1/LRP8/STK11/PTPRD/RAB11A/DMTN/UNC13D/CALR/CDH4/FLNA/TUBB2B/CAPRIN1/IST1/SEMA4D/PLXNB2/VAMP7/L1CAM/TIAM1/BRAF/CUX1/MAP1B/BAIAP2/ROBO2/TRPC5/AMIGO1/FBXO31/PLXND1/METRN/CYFIP1/ZFYVE27/MEGF8/ANKRD27/TRAK1/ABL1/C1QBP/STK25/GOLGA4/CAMK2B/RREB1…	104
GO:0006839	mitochondrial transport	biological process	209/9065	307/17381	8.07044e-09	3.99819e-07	2.87787e-07	1.30531	HES1/UCP2/E2F1/BAP1/BCL2/HSPA1A/RHOT1/YWHAQ/SLC25A22/SLC25A1/SLC25A30/HPS4/MTX1/FBXW7/HSPD1/HSPA4/CPT1A/TP53/HK2/BCL2L11/TP73/STAT3/YWHAZ/PMAIP1/LRRK2/MAPK8/BAX/STARD7/HHAT/TIMM50/FAM20B/ATP5B/SLC25A15/RAC2/DYNLL2/MID1IP1/YWHAH/NKAP/SLC25A19/KAT2A/SLC25A10/MFN2/SFN/CSNK2A2/TMEM14A/TIMM23/HSP90AA1/RHOT2/WDR46/SREBF1/SLC25A3/ATP5G3/NMT1/HTRA2/ATP5S/GSK3A/U2AF2/PPP3R1/UCP3/USP36/MYBPC1/HUWE1/PPP1R13…	209
GO:0060560	developmental growth involved in morphogenesis	biological process	148/9065	207/17381	8.76298e-09	4.31589e-07	3.10656e-07	1.37088	NTRK3/WNT3A/ESR1/ZEB2/RAB21/PAK1/RARG/NRP1/SHTN1/BDNF/MED1/VEGFA/CPNE6/APP/FN1/CSF1/DDR1/TWF2/SRF/SOX9/ILK/TGFBR2/NOTCH1/DNM2/BMPR2/CXCL12/SIX1/NRP2/SIX4/NDEL1/STK11/SPART/RNF6/RAB11A/WNT5A/SPP1/SPRY2/FGFR2/RIMS2/PLXNA4/CDH4/CTTN/IST1/SEMA4D/L1CAM/BIN3/BCL11A/RDH10/EPHA7/ITGB1/ITSN2/TTL/VCL/SALL1/TIAM1/TRIM28/DVL1/CTNNB1/TGFB1/TBX2/MAP1B/TRPC5/SYT4/SLIT1/SLC9A6/RASAL1/CYFIP1/ZFYVE27/PTK7/WDR36/ME…	148
GO:0061564	axon development	biological process	307/9065	473/17381	8.99503e-09	4.40443e-07	3.17028e-07	1.24447	CXCR4/NTRK3/STMN1/TUBB3/WNT3A/KRAS/ZEB2/RAB21/BCL2/JUN/PAK1/GRB2/PTPRF/PICALM/PDLIM7/NRP1/CERS2/SHTN1/INPP5F/UST/BDNF/KLF4/EGR2/MAP2K1/VEGFA/MAPK7/APP/FN1/PTK2/LRP4/ARHGDIA/RPS6KA5/DDR1/TWF2/HRAS/ERBB2/BMP7/SIAH1/SRF/SMAD4/MAPK3/CREB1/PTCH1/MAPK1/NTRK2/ARTN/ILK/NCAM1/NOTCH1/PAX6/DNM2/BMPR2/RHOA/CXCL12/PLXNC1/DHFRP1/VASP/NRP2/EPHA4/NDEL1/ADARB1/NFIB/STK11/VLDLR/GRB10/SPART/SHC1/RNF6/BCL11B/RAB11A/…	307
GO:0006997	nucleus organization	biological process	109/9065	145/17381	9.23807e-09	4.49383e-07	3.23463e-07	1.44134	H3F3B/SYNE1/POM121/ETS1/NDC1/SYNE2/NUP58/PITPNB/CDK1/TMEM33/SUN2/NDEL1/UBXN2A/SF1/NUP62/TARDBP/EMD/NUP50/POM121C/PPP2R2A/LEMD3/CHMP2A/NUP160/CTDNEP1/NUP210/CCNB1/HIPK2/NUP153/CHD5/TOR1AIP2/VPS4A/PLK1/RANBP2/KDM3A/NUTF2/NUP214/AAAS/REEP4/PRKCA/NUP37/SUN1/TMF1/TBPL1/NOLC1/NEK9/ATXN7/PPP2CA/AKAP8L/TPR/POLR1B/NUPL2/SRPK1/AHCTF1/ZNF354A/NUP98/NUP43/CNEP1R1/PAFAH1B1/AGFG1/REEP3/CHMP2B/UBXN2B/CHMP4B/OSB…	109
GO:2001252	positive regulation of chromosome organization	biological process	116/9065	156/17381	9.28434e-09	4.49383e-07	3.23463e-07	1.42574	DNMT1/MYB/CDK9/DNMT3B/BRCA1/ATM/VEGFA/MECP2/HNRNPD/PRKD2/LIF/RPS6KA5/HNRNPU/TP53/SMAD4/MAPK3/BRD7/SIRT1/MAPK1/RB1/LRRK2/SNAI2/NIPBL/CDT1/PHF19/ESPL1/FEN1/CCT3/JARID2/SIN3A/HIST1H1B/PAXBP1/MRE11/KAT2A/SMARCB1/GATA3/CTBP1/HNRNPA1/MIER1/CCNB1/KMT2A/TNKS/SLX4/SREBF1/WBP2/TRIM28/DDX11/UBE2N/CTNNB1/TGFB1/NELFE/CCT5/ATRX/PPARGC1A/RIF1/CCT7/NABP2/SFPQ/AKAP8/CCT4/CCT2/CHTOP/CCT6A/RUVBL2/SETDB1/TCP1/RNF40/…	116
GO:0006352	DNA-templated transcription, initiation	biological process	170/9065	243/17381	9.72902e-09	4.66083e-07	3.35484e-07	1.34137	CDK9/CCND1/CDKN1A/NOTCH3/ESR1/GTF2H1/JUN/RARG/NOTCH2/CAND1/MITF/POLR2K/NOTCH4/MED1/HNF4A/NR1I2/TAF4B/RXRB/MED16/MED6/CREBBP/PPARA/PPARG/SRF/SOX9/MAPK3/CREB1/E2F3/NOTCH1/CTGF/RUNX2/TAF9/NR6A1/POLR2D/CDK4/BAX/HMGB1/CDK1/WWTR1/E2F2/RSF1/NR3C1/NR2C2AP/CBFB/TCF4/MED4/PGR/NAT14/UBTF/NR5A2/POLR2I/POLRMT/CCNB1/NR4A3/NR4A1/ATF7IP/NCOA6/GTF3C1/POLR2A/CTNNBIP1/POLR2L/NR1D2/TRIM28/CTNNB1/MED15/POLR2B/MED14/B…	170
GO:0001841	neural tube formation	biological process	81/9065	102/17381	9.74005e-09	4.66083e-07	3.35484e-07	1.52262	TRAF6/ZEB2/RARG/ARID1A/SUFU/SDC4/IFT52/DVL2/BMP7/HIF1A/PTCH1/SCRIB/PFN1/VASP/MTHFD1/TMED2/SOX4/LUZP1/WNT5A/DLC1/KAT2A/FOLR1/KDM2B/PLXNB2/GLMN/MTHFD1L/SKI/PRKACA/DVL1/TSC2/TGFB1/TEAD2/TSC1/MIB1/PTK7/SEMA4C/CFL1/TCTN1/ABL1/SEC24B/RALA/GDF7/LRP2/MED12/SFRP1/STK3/SETD2/NODAL/VANGL2/FZD6/STK4/SOX11/TRIM71/PRICKLE1/NOG/LRP6/ADM/BBS4/KDM6A/NPHP3/APAF1/TWIST1/RARA/PAX2/DVL3/ALX1/ARHGAP35/CC2D2A/PRKACB/FZ…	81
GO:0034470	ncRNA processing	biological process	264/9065	400/17381	9.9212e-09	4.7207e-07	3.39793e-07	1.26547	OSGEPL1/RNASEL/ADAR/TRMT13/PA2G4/CPSF1/NSUN4/DICER1/GEMIN4/SIRT1/NSUN5/SMAD2/MRPS9/DDX21/TYW3/AGO1/BMT2/WDR37/TSR1/SAMD15/INTS6/ELP1/FRG1/DROSHA/RPP40/RRP36/FTSJ1/ISG20/SRRT/DIEXF/ABT1/RPUSD2/LIN28B/UTP20/DDX1/RPS8/RPS2/PDCD11/UBA52/XRN2/RPL36A/RPL29/WDR46/RPL18A/NOP2/RPL3/RPS6/AARS/RPL4/RPLP1/RPS14/PELP1/RPL7A/RPL10/DDX17/RPL18/INTS3/NOL9/RPL37/RPL13/UTP4/PWP2/RRP1B/RRP7A/RPS27/INTS4/RPL8/RPS15A…	264
GO:0000956	nuclear-transcribed mRNA catabolic process	biological process	149/9065	209/17381	1.07164e-08	5.07042e-07	3.64966e-07	1.36693	DDX5/ATM/CNOT6/POLR2D/ZFP36L2/TTC37/EIF4B/RBM8A/TNKS1BP1/PAPD4/AGO1/CNOT4/DDX6/PDE12/EIF4G1/PPP2R2A/EIF4E/PAN3/CPEB3/RPS8/PNRC1/RPS2/EDC3/DHX34/UBA52/RPL36A/LSM2/RPL29/PAIP1/RPL18A/TNRC6B/SECISBP2/RPL3/RPS6/SAMD4B/RPL4/RPLP1/RPS14/RPL7A/RPL10/EIF4A2/CNOT1/RPL18/RPL37/EIF4A1/RPL13/NANOS1/PABPC1/RPS27/RPL8/RPS15A/RPS5/RPL10A/RNPS1/HBS1L/SMG5/NCBP2/RPS18/RPS10/RPS3A/SMG1/RPS28/RPLP0/RPS4X/CSDE1/CNOT…	149
GO:0060627	regulation of vesicle-mediated transport	biological process	302/9065	465/17381	1.07874e-08	5.0755e-07	3.65331e-07	1.24526	WNT3A/AKT2/TLR2/ANXA1/RAB21/PDCD6IP/LRP1/PICALM/NRP1/ANXA2/AXL/SDC4/RABGAP1L/INPP5F/MAP2K1/VEGFA/CSK/EHD2/HMOX1/HGS/PPARG/MAPK3/UVRAG/SERPINE1/MAPK1/MSN/MERTK/IFNG/NOTCH1/RAP1A/SDC1/NTF3/RAB5A/DNM2/LDLR/LRRK2/CFTR/RAB5C/HMGB1/TBC1D1/VAMP8/RAC2/RAB14/SNX12/GAS1/GOPC/RAB5B/ANKFY1/PRKAA1/TSG101/CD2AP/ARHGAP1/RIMS3/AP1G1/RAB11A/RIMS4/WNT5A/ITGB2/SYT12/STON2/ABL2/AP2S1/CD63/RIMS2/RAP1B/KIF5B/UNC13D/CA…	302
GO:0071902	positive regulation of protein serine/threonine kinase activity	biological process	234/9065	350/17381	1.27492e-08	5.96522e-07	4.29373e-07	1.2819	CXCR4/NTRK3/CCND2/IRAK2/KRAS/CCND1/TRAF6/IRAK1/ZEB2/CCND3/PAK1/SOD1/MAP3K8/THBS1/HACD3/IQGAP3/EGFR/IGF1/CRK/MAP2K1/FGFR1/VEGFA/EZH2/CSK/FGF2/CCNL1/P2RX7/CALM3/PEA15/DVL2/CDKN1B/EDN1/CD40LG/HRAS/IGF2/ERBB2/MAP3K11/CALM2/CRKL/MAPK3/SIRT1/MAPK1/FLT1/TLR4/ILK/PIK3CG/TP73/IFNG/RAP1A/FLT3/NTF3/AKT1/LRRK2/ADAM9/LPAR1/RHOA/TGFBR1/DDX3X/GADD45A/PSRC1/HSP90AB1/PARP16/CDK1/C1QTNF2/CDC6/C5/EPHA4/MAPRE3/PRKAA…	234
GO:0007179	transforming growth factor beta receptor signaling pathway	biological process	127/9065	174/17381	1.30351e-08	6.06528e-07	4.36575e-07	1.39946	ACVR1/NLK/HSPA1A/JUN/PPM1A/THBS1/SNX6/ZEB1/CHST11/ARHGEF18/PTK2/KLF10/CDKN1C/FERMT2/SMAD4/CREB1/SIRT1/TGFBR2/FOS/PTPRK/DNM2/SMAD5/ADAM9/SMAD2/RHOA/TGFBR1/PRDM16/HSP90AB1/TGFBR3/STK11/MTMR4/CGN/RNF111/FBN1/CD109/LEMD3/MYOCD/ITGA3/FOLR1/CCL2/F11R/SRC/CAV1/BCL9L/UBA52/ZNF703/UBB/HIPK2/BAMBI/PDPK1/SKI/TRIM33/FBN2/TGFB1/COL3A1/BMPR1A/PARP1/PEG10/ZYX/SMAD3/SMURF1/UBC/USP9X/HSPA5/SMAD1/WNT1/MAP3K7/NODAL…	127
GO:0072175	epithelial tube formation	biological process	99/9065	130/17381	1.37504e-08	6.36298e-07	4.58003e-07	1.46015	TRAF6/ZEB2/RARG/ARID1A/SUFU/SDC4/IFT52/WNT9B/DVL2/BMP7/HIF1A/SOX9/PTCH1/SCRIB/PODXL/PFN1/VASP/SIX1/MTHFD1/TMED2/SOX4/SIX4/LUZP1/WNT5A/DLC1/FGFR2/KAT2A/FOLR1/GATA3/KDM2B/PLXNB2/GLMN/HAND1/MTHFD1L/SKI/PRKACA/DVL1/TSC2/CTNNB1/TGFB1/TEAD2/TSC1/MIB1/PTK7/SEMA4C/CFL1/TCTN1/ABL1/SEC24B/RALA/GDF7/LRP2/MED12/SFRP1/STK3/SETD2/NODAL/VANGL2/FZD6/STK4/SOX11/TRIM71/PRICKLE1/NOG/LRP6/ADM/RET/OSR1/BBS4/GREM1/KDM…	99
GO:0010212	response to ionizing radiation	biological process	111/9065	149/17381	1.61851e-08	7.44868e-07	5.36151e-07	1.42838	CCND2/CCND1/CDKN1A/ANXA1/DNMT3A/BCL2/MSH2/RAD51C/DNMT3B/RHOB/GRB2/BRCA2/BRCA1/ATM/HMGA2/RAD51/VCAM1/CLOCK/HRAS/TP53/SIRT1/TP73/MGMT/DNM2/SNAI2/MDM2/NIPBL/BAX/GADD45A/ECT2/TICRR/FANCD2/BLM/TNKS1BP1/PRKAA1/STK11/TMEM109/ELK1/AEN/GATA3/CCL2/RAD9A/MYC/INTS3/TGFB1/LZIC/BRAT1/RNF168/NABP2/GPX1/BRCC3/NUCKS1/PARP1/TIGAR/XRCC6/RPL26/DCLRE1C/XRCC5/EEF1D/IKBIP/CASP3/BCL2L1/SFRP1/HSPA5/USP28/YAP1/ICAM1/CBL/M…	111
GO:0036293	response to decreased oxygen levels	biological process	233/9065	349/17381	1.65149e-08	7.55914e-07	5.44103e-07	1.28008	CXCR4/GATA6/MYB/UCP2/TLR2/E2F1/FOXO3/IRAK1/DNMT3A/BCL2/DNMT3B/PAK1/THBS1/PKM/ATM/ITPR1/VEGFA/EP300/PRKCE/ETS1/HSP90B1/MECP2/CCNA2/VCAM1/PLAU/CREBBP/BACH1/HMOX1/CDKN1B/PPARA/EDN1/NF1/TP53/BMP7/HIF1A/CUL2/SRF/SMAD4/CREB1/SIRT1/SLC2A4/PTGS2/EGLN2/SLC8A1/TGFBR2/TEK/NOTCH1/CTGF/PMAIP1/AKT1/MDM2/EDNRA/CXCL12/HYOU1/TERT/NPPC/TGFBR3/APOLD1/EGLN3/PSMD9/PRKAA1/HIF1AN/AGTRAP/ACTN4/NOP53/OXTR/SLC29A1/ANGPTL4…	233
GO:0097191	extrinsic apoptotic signaling pathway	biological process	154/9065	218/17381	1.68349e-08	7.664e-07	5.5165e-07	1.35448	ACVR1/FADD/FOXO3/BCL2/HSPA1A/MCL1/BCL2L2/THBS1/NRP1/IGF1/BRCA1/CASP9/TIMP3/FGFR1/FAF1/ERBB3/MAPK7/CYLD/P2RX7/PEA15/HMOX1/NF1/FAS/SERPINE1/BCL2L11/IFNG/PMAIP1/RB1CC1/AKT1/SNAI2/TGFBR1/DDX3X/BAX/STRADB/TERT/TMC8/RNF41/BCL2A1/GSTP1/ITGA6/PDIA3/CTTN/SRC/IL2/ITGAV/CAV1/PHIP/ARHGEF2/PDPK1/HSPA1B/HTRA2/LGALS3/GSK3A/TGFB1/CTNNA1/CASP2/HTT/CASP8AP2/UNC5B/GPX1/PARK7/SMAD3/TMBIM1/PAK2/PTEN/APPL1/MKNK2/TNFRS…	154
GO:0071383	cellular response to steroid hormone stimulus	biological process	179/9065	259/17381	1.7019e-08	7.70612e-07	5.54682e-07	1.32514	FOXO3/ESR1/ANXA1/CCNE1/DNMT3B/PAK1/FOXP1/FOXO1/RARG/EGFR/ARID1A/BRCA1/CASP9/DDX5/PIAS1/MED1/EP300/HNF4A/NR1I2/RXRB/MED16/PPARA/UBE2I/HNRNPU/CLOCK/EDN1/BMP7/PPARG/NRIP1/SIRT1/HDAC1/RB1/ERRFI1/EGLN2/KLF9/FLT3/RBFOX2/NR6A1/CREBRF/ZFP36L2/ATP1A1/LEF1/GJB2/KANK2/EPHX1/IL6/CRY2/NR3C1/KMT2D/CBFB/RAN/RNF6/YWHAH/MED4/PGR/GSTP1/CALR/PGRMC2/NR5A2/EIF4E/UBR5/CCL2/ARG1/SRC/NR4A3/NR4A1/AXIN1/NCOA6/FKBP4/NCOA3/…	179
GO:0016311	dephosphorylation	biological process	276/9065	422/17381	1.72393e-08	7.76414e-07	5.58858e-07	1.25402	MEF2C/PTPN12/CDC25A/SPRED1/CDC14A/BCL2/CDC14B/HDHD2/ROCK1/PPM1A/PTPRF/SH2D4A/INPP5F/PXYLP1/INPPL1/IKBKB/HSP90B1/NT5DC1/CALM3/PPP2R5A/PTPN13/CDKN3/PTPN7/CALM2/IFNG/PTPRK/PPTC7/ATP1A1/PKMYT1/HSP90AB1/PPA2/TIMM50/CTDSP2/CDCA2/NT5DC3/BTRC/PHLPP1/CRY2/RPRD1B/DUSP8/PTP4A1/PPP6R3/PPP1R15B/PTPRG/GPATCH2/STYX/CPPED1/MTMR4/PTPN4/MTMR9/PTPRD/SLC39A10/NUAK1/PTPN9/DLC1/PTPRR/SYMPK/PTPMT1/PPM1H/SFI1/ACP2/SYTL2…	276
GO:0031098	stress-activated protein kinase signaling cascade	biological process	197/9065	289/17381	1.83998e-08	8.24271e-07	5.93305e-07	1.307	IRAK2/CDC42/TRAF6/IRAK1/ZEB2/PDCD4/PAK1/MAP3K8/FOXO1/HACD3/EGFR/HAND2/MAP2K1/VEGFA/IKBKB/APP/NEK4/NFKB1/IGF1R/DVL2/EDN1/CD40LG/CHUK/FAS/HRAS/MAP3K11/CRKL/MAPK3/MAPK1/TLR4/TP73/CTGF/RB1CC1/AKT1/MAPK8/GADD45A/STRADB/HMGB1/HMGCR/BTRC/PHLPP1/EPHA4/RASSF2/WNT5A/MAP3K21/GSTP1/STK24/CCDC88C/F2RL1/DKK1/PDCD10/PTPN22/ZNF622/HIPK3/PTPN1/RIPK2/MAP4K2/AXIN1/MYC/UBA52/UBB/HIPK2/MINK1/PAK4/TIAM1/QARS/UBE2N/SKP…	197
GO:0034605	cellular response to heat	biological process	89/9065	115/17381	1.88559e-08	8.40185e-07	6.0476e-07	1.48388	CDKN1A/IRAK1/HSPA1A/THBS1/DNAJB1/POM121/ATM/EP300/CREBBP/HMOX1/NF1/MAPK3/SIRT1/MAPK1/PTGS2/IER5/NDC1/POLR2D/RBBP7/NUP58/HSP90AB1/RPA2/NUP62/BAG5/MKI67/NUP50/HDAC2/POM121C/NUP160/NUP210/CAMK2G/HSP90AA1/CCAR2/FKBP4/NUP153/MTOR/PRKACA/PTGES3/HSPA1B/HTRA2/HSPA8/RANBP2/YWHAE/NUP214/AAAS/HSPH1/NUP37/HSPA1L/MAPKAPK2/TPR/NUPL2/CAMK2B/BAG1/NUP98/NUP43/GSK3B/EIF2S1/BAG4/DNAJB6/LYN/MAPT/NUP205/BAG2/CAMK2A/H…	89
GO:1903364	positive regulation of cellular protein catabolic process	biological process	144/9065	202/17381	1.89545e-08	8.40185e-07	6.0476e-07	1.36684	PLK2/CEBPA/HSPA1A/LRP1/CTSC/OSBPL7/RNF138/ANKIB1/PIAS1/FBXW7/ANAPC16/PTK2/MSN/TRIB2/LDLR/AKT1/LRRK2/MDM2/UBE2C/CDC20/BUB1B/CDK1/FBXO5/BTRC/PSMD9/FBXL5/SOCS4/CSNK1A1/MAD2L1/NOP53/RGN/CCDC22/PSME1/CCNB1/CAV1/AXIN1/UBA52/PSMD3/UBB/BAG6/PSMB2/RACK1/ANAPC1/DVL1/PSMD4/FZR1/PSMD11/XBP1/RAD23A/USP5/SKP1/PSMC1/PLK1/KEAP1/PSMB3/PSMA7/UBQLN2/PSMC5/PTEN/SMURF1/PSMD2/UBC/ATPIF1/PSMD6/RDX/UBQLN1/VPS11/PSMC4/RN…	144
GO:1905475	regulation of protein localization to membrane	biological process	114/9065	154/17381	1.91596e-08	8.44829e-07	6.08103e-07	1.41936	WNT3A/AKT2/E2F1/BCL2/PAK1/LRP1/YWHAQ/PICALM/EGFR/LZTFL1/RAB11FIP2/KCNE1/PRKCE/CSK/AGR2/LRP4/PPP2R5A/TP53/ERBB2/BCL2L11/TP73/IFNG/YWHAZ/PMAIP1/AKT1/CSNK2A1/MAPK8/EPHA2/PRNP/VAMP8/GOPC/DYNLL2/YWHAH/RAB11A/MESD/DMTN/KIF5B/PLS1/CLTC/ITGA3/CCL2/VAMP7/SFN/CDH2/MIEF1/ITGB1/PDPK1/RACK1/NMT1/TGFB1/VPS4A/PPP3R1/PPP1R13B/ZMYND8/YWHAE/STX7/TMBIM1/SPTBN1/APPL1/PPFIA1/TCAF1/YWHAB/PDCD5/EZR/C2CD5/BCL2L1/TMEM59/…	114
GO:0050772	positive regulation of axonogenesis	biological process	63/9065	76/17381	1.94902e-08	8.54928e-07	6.15372e-07	1.5894	NTRK3/WNT3A/ZEB2/PAK1/NRP1/SHTN1/BDNF/MAP2K1/VEGFA/FN1/ARHGDIA/TWF2/SRF/NTRK2/ILK/BMPR2/RHOA/CXCL12/PLXNC1/NDEL1/STK11/RAB11A/CDH4/TUBB2B/IST1/SEMA4D/PLXNB2/L1CAM/TIAM1/BRAF/MAP1B/ROBO2/TRPC5/AMIGO1/PLXND1/METRN/CYFIP1/ZFYVE27/MEGF8/TRAK1/STK25/GOLGA4/PAFAH1B1/SKIL/GDI1/SEMA7A/ROBO1/LIMK1/MAPT/SEMA5A/DISC1/NTN1/WNT3/NGFR/SHOX2/TRPV2/RND2/EFNA5/ISLR2/TNFRSF12A/NRG1/PLXNB1/CRABP2	63
GO:0006606	protein import into nucleus	biological process	189/9065	276/17381	2.08045e-08	9.07851e-07	6.53466e-07	1.31298	DRD1/HES1/WNT3A/TLR2/CDKN1A/JUN/PPM1A/POLA2/F2/EGFR/IGF1/TMSB4X/SUFU/POM121/RERE/MED1/FAF1/MAPK7/PIK3R2/APP/CYLD/NF1/ERBB4/BMP7/SMAD4/SIRT1/MAPK1/TLR4/NFKBIA/PTGS2/FGF9/IFNG/STAT3/AKT1/LRRK2/SNAI2/RHOA/TGFBR1/NUP58/ECT2/HSP90AB1/CDK1/KPNA2/NLRP3/CDH1/SULF2/WWTR1/TNPO2/GPN1/IL6/RAN/NUP62/SEC61B/JUP/G3BP2/IPO8/EMD/NUP50/PDIA3/POM121C/FLNA/SRI/CCDC22/TRPS1/IPO9/UBR5/KPNA5/BAMBI/NUP153/MTOR/KPNB1/TRI…	189
GO:1903320	regulation of protein modification by small protein conjugation or removal	biological process	198/9065	291/17381	2.11714e-08	9.19099e-07	6.61562e-07	1.30461	BMI1/CDK9/HDAC4/TRAF6/CDC14B/HSPA1A/BRCA1/SUFU/PIAS1/PRKCE/FBXW7/ANAPC16/PTK2/UBE2I/N4BP1/OTUB1/XIAP/LRRK2/TGFBR1/AIMP2/UBE2C/FANCI/HSP90AB1/CDC20/BUB1B/CDK1/FBXO5/BTRC/SOX4/SPOPL/TOLLIP/UBXN2A/PSMD9/ARRDC3/SPRTN/RNF111/ISG15/NMI/BAG5/MAD2L1/DCUN1D1/NOP53/NXN/RASSF5/CCDC22/PTPN22/PSME1/UBR5/RIPK2/CCNB1/GLMN/CAV1/AXIN1/UBA52/PSMD3/FEM1A/HSP90AA1/PEF1/UBB/NDFIP2/PSMB2/MTOR/ANAPC1/HSPA1B/UBE2N/PSMD4…	198
GO:0044089	positive regulation of cellular component biogenesis	biological process	317/9065	493/17381	2.19203e-08	9.46733e-07	6.81453e-07	1.23288	NTRK3/MET/CDC42/ANLN/HDAC4/ESR1/GTF2H1/HSPA1A/JUN/PDCD6IP/ROCK1/PAK1/GRB2/TPM1/NRP1/CAND1/AGRN/SH3PXD2B/MITF/SDC4/BDNF/TAC1/ATM/FAF1/VEGFA/FSCN1/PRKCE/CNOT6/MECP2/DPYSL3/P2RX7/HGS/CDKN1B/EDN1/TWF2/FAS/HRAS/TP53/BMP7/SRF/SOX9/CREB1/PIEZO1/BCL2L11/MSN/NTRK2/KDR/TLR4/TEK/IFNG/CTGF/PMAIP1/SDC1/DNM2/PFN1/WASF2/LPAR1/RHOA/TGFBR1/LIMS1/BAX/CCP110/CLSTN1/PIP4K2C/PSRC1/VASP/DDB1/CDC42EP4/ABI2/CDT1/RAC2/NF…	317
GO:0045931	positive regulation of mitotic cell cycle	biological process	108/9065	145/17381	2.56592e-08	1.10138e-06	7.92767e-07	1.42811	HES1/CCND2/CCND1/ANXA1/RAD51C/IGF1/BRCA2/FGFR1/MECP2/APP/CDK10/HNRNPU/EDN1/IGF2/RB1/MDM2/DDX3X/CDK4/UBE2C/NDC80/TERT/CDK1/CDCA5/CDC6/CDT1/ESPL1/NUP62/RAB11A/CUL4B/RCC2/SIN3A/BTC/DYNC1LI1/MAD2L1/EIF4G1/EIF4E/TMOD3/ANKRD17/CCNB1/CDC25B/TTL/PHIP/TGFB1/BRD4/RANBP3/CDC45/PTPN11/RANBP2/DUSP3/MEPCE/PRKCA/CUL4A/PHB2/STAT5B/RDX/ABL1/TPR/USP22/AURKA/UBE2E2/WNT10B/TAL1/PAFAH1B1/RPS6KB1/RGPD4/EIF4EBP1/SMARCD…	108
GO:1905330	regulation of morphogenesis of an epithelium	biological process	130/9065	180/17381	2.57625e-08	1.10138e-06	7.92767e-07	1.38477	CDC42/ESR1/FOXP1/FGFR1/VEGFA/HOXB7/LIF/WNT9B/DVL2/BMP7/FGF7/SOX9/GPC4/PFN1/SNAI2/RHOA/SIX1/SIX4/PSMD9/WNT5A/STAT1/FGFR2/AP2S1/DKK1/PHLDB2/CLTC/PSME1/GATA3/LGR4/UBA52/PSMD3/UBB/MAGED1/AP2B1/PSMB2/AP2A2/MTOR/TIAM1/DVL1/PSMD4/CTNNB1/TGFB1/TBX2/PSMD11/PSMC1/PSMB3/PSMA7/PSMC5/PTEN/PTK7/PHB2/SMURF1/AP2A1/PSMD2/UBC/PSMD6/PSMC4/SMO/PSMD1/PSME3/PSMD7/ABL1/VANGL1/SEC24B/PSMA2/PSMD8/PSMD13/PSMC3/MED12/HOXD1…	130
GO:0061013	regulation of mRNA catabolic process	biological process	125/9065	172/17381	2.59354e-08	1.10317e-06	7.94056e-07	1.39344	E2F1/HSPA1A/RNASEL/SET/HNRNPD/HNRNPU/YWHAZ/AKT1/ZFP36L2/XPO1/PSMD9/TARDBP/PDE12/EIF4G1/ANP32A/YTHDF2/PSME1/IGF2BP3/CPEB3/IGF2BP1/YBX1/DHX34/UBA52/PSMD3/UBB/PAIP1/TNRC6B/PSMB2/LARP1/SECISBP2/MTOR/HNRNPC/SAMD4B/MEX3D/CNOT1/PSMD4/NANOS1/PSMD11/PABPC1/GIGYF2/HSPA8/PSMC1/HNRNPR/IGF2BP2/SERBP1/PSMB3/PSMA7/CNOT8/NUP214/YBX3/PSMC5/PRKCA/MAPKAPK2/PSMD2/UBC/HNRNPA0/PUM1/PSMD6/QKI/PSMC4/PSMD1/GTPBP1/PSME3/P…	125
GO:0010975	regulation of neuron projection development	biological process	277/9065	425/17381	2.65661e-08	1.12432e-06	8.09279e-07	1.24968	NTRK3/MEF2C/WNT3A/PLK2/ZEB2/RAB21/PAK1/LRP1/PTPRF/NRP1/GAK/ADCY6/CERS2/SHTN1/PREX1/INPP5F/UST/BDNF/KLF4/MAP2K1/FGFR1/VEGFA/EZH2/CPNE6/FN1/PTK2/LRP4/DPYSL3/ARHGDIA/SNAPIN/TWF2/BMP7/SRF/NTRK2/ILK/RAP1A/DNM2/BMPR2/AKT1/LRRK2/MDM2/LPAR1/RHOA/CXCL12/PLXNC1/CDC20/ZNF365/ITPKA/IL6/EPHA4/NDEL1/LRP8/PTPRG/STK11/VLDLR/PPP1R9A/SPART/PTPRD/RNF6/YWHAH/RAB11A/WNT5A/SPP1/ABL2/STK24/BAG5/RIMS2/LGALS1/PLXNA4/NPTN…	277
GO:0051168	nuclear export	biological process	141/9065	198/17381	2.96176e-08	1.2472e-06	8.97726e-07	1.3654	PPM1A/ANP32B/XPO6/POM121/UHMK1/EGR2/ATXN1/SRSF11/CPSF1/SRSF9/TP53/SRSF1/MDM2/SRSF7/DDX39A/NDC1/POLR2D/DNAJC27/BARD1/XPO1/STRADB/NUP58/NMD3/RBM8A/SOX4/HHEX/WDR33/GLE1/STYX/SRSF2/RAN/SRSF3/NUP62/SRSF6/IFI27/SRRM1/SYMPK/CPSF3/SLBP/CALR/EMD/SRSF4/ZC3H11A/NUP50/NOP53/POM121C/EIF4E/NUP160/NUP210/XPOT/SRSF5/HNRNPA1/SFN/RITA1/NUP153/PRKACA/TGFB1/RANBP3/U2AF2/RNPS1/PTPN11/SMG5/CSE1L/NCBP2/RANBP2/NPM1/YWHA…	141
GO:0006364	rRNA processing	biological process	177/9065	257/17381	3.04255e-08	1.27484e-06	9.17625e-07	1.32053	RNASEL/PA2G4/NSUN4/GEMIN4/SIRT1/NSUN5/MRPS9/DDX21/BMT2/WDR37/TSR1/SAMD15/FRG1/RPP40/RRP36/ISG20/DIEXF/ABT1/RPUSD2/UTP20/RPS8/RPS2/PDCD11/UBA52/XRN2/RPL36A/RPL29/WDR46/RPL18A/NOP2/RPL3/RPS6/RPL4/RPLP1/RPS14/PELP1/RPL7A/RPL10/DDX17/RPL18/NOL9/RPL37/RPL13/UTP4/PWP2/RRP1B/RRP7A/RPS27/RPL8/RPS15A/RPS5/RPL10A/NOP10/MRPS11/RPS18/RPS10/RPS3A/RPS28/RPLP0/RPS4X/RRP1/MPHOSPH10/RPL9/RPL7L1/RPL23A/RPL27A/RPS3…	177
GO:0048762	mesenchymal cell differentiation	biological process	136/9065	190/17381	3.09803e-08	1.29166e-06	9.2973e-07	1.37244	MEF2C/HES1/ACVR1/ZEB2/PDCD4/BCL2/NRP1/CORO1C/HAND2/DDX5/FGFR1/HMGA2/EZH2/HPN/COL1A1/EDN1/JAG1/ERBB4/BMP7/HIF1A/SMAD4/SOX9/MAPK3/MAPK1/TGFBR2/NOTCH1/SNAI2/PDPN/SMAD2/FOXF2/EDNRA/TGFBR1/LEF1/TGFBR3/WWTR1/RFLNB/ERG/WNT5A/STAT1/FGFR2/HDAC2/PHLDB2/FOLR1/RDH10/HNRNPAB/BCL9L/ZNF703/PEF1/BAMBI/FRZB/TCOF1/MTOR/TIAM1/TBX1/TRIM28/DDX17/CTNNB1/TGFB1/BMPR1A/EFNB1/FOXC1/ALDH1A2/SMAD3/PTEN/CFL1/NOLC1/SPRY1/SMO/…	136
GO:1900034	regulation of cellular response to heat	biological process	64/9065	78/17381	3.31552e-08	1.37553e-06	9.90101e-07	1.57323	HSPA1A/DNAJB1/POM121/ATM/EP300/CREBBP/MAPK3/SIRT1/MAPK1/IER5/NDC1/NUP58/HSP90AB1/RPA2/NUP62/BAG5/NUP50/POM121C/NUP160/NUP210/CAMK2G/HSP90AA1/CCAR2/FKBP4/NUP153/MTOR/PTGES3/HSPA1B/HSPA8/RANBP2/YWHAE/NUP214/AAAS/HSPH1/NUP37/HSPA1L/MAPKAPK2/TPR/NUPL2/CAMK2B/BAG1/NUP98/NUP43/GSK3B/BAG4/DNAJB6/MAPT/NUP205/BAG2/CAMK2A/NUP155/SEH1L/NUP54/HSPB8/NUP93/CHORDC1/NUP188/NUP85/NUP35/BAG3/CD34/AKT1S1/RPA1/HSBP1	64
GO:0035107	appendage morphogenesis	biological process	109/9065	147/17381	3.35211e-08	1.37715e-06	9.91261e-07	1.42173	CACNA1C/RARG/HAND2/HOXD10/CHST11/FGFR1/MED1/IFT52/LRP4/CREBBP/HOXA10/BMP7/SMAD4/SOX9/PTCH1/HDAC1/BCL2L11/FGF9/NOTCH1/RECK/RUNX2/NIPBL/BAX/LEF1/MYCN/SOX4/MBNL1/WNT5A/FGFR2/DKK1/HDAC2/GLI2/RDH10/GNAS/HOXC11/PBX2/SKI/SALL1/CTNNB1/FBN2/TBX2/BMPR1A/ATRX/LNPK/ALDH1A2/MEGF8/DYNC2H1/PITX1/HOXD13/RARB/FZD6/CHD7/SALL3/SOX11/NOG/ASPH/GLI3/OSR1/FMN1/HOXD9/PLXNA2/EVX2/GREM1/SP8/ECE1/IHH/RNF165/DLX6/INTU/WNT3/…	109
GO:0035108	limb morphogenesis	biological process	109/9065	147/17381	3.35211e-08	1.37715e-06	9.91261e-07	1.42173	CACNA1C/RARG/HAND2/HOXD10/CHST11/FGFR1/MED1/IFT52/LRP4/CREBBP/HOXA10/BMP7/SMAD4/SOX9/PTCH1/HDAC1/BCL2L11/FGF9/NOTCH1/RECK/RUNX2/NIPBL/BAX/LEF1/MYCN/SOX4/MBNL1/WNT5A/FGFR2/DKK1/HDAC2/GLI2/RDH10/GNAS/HOXC11/PBX2/SKI/SALL1/CTNNB1/FBN2/TBX2/BMPR1A/ATRX/LNPK/ALDH1A2/MEGF8/DYNC2H1/PITX1/HOXD13/RARB/FZD6/CHD7/SALL3/SOX11/NOG/ASPH/GLI3/OSR1/FMN1/HOXD9/PLXNA2/EVX2/GREM1/SP8/ECE1/IHH/RNF165/DLX6/INTU/WNT3/…	109
GO:0090066	regulation of anatomical structure size	biological process	297/9065	460/17381	3.37514e-08	1.37767e-06	9.91639e-07	1.23796	DRD1/NTRK3/WNT3A/RAB21/PAK1/SOD1/SOD2/GRB2/RARG/PICALM/NRP1/LRRC8A/IQGAP3/EGFR/TMSB4X/GJA1/ADCY6/CLCN3/PLEKHG2/SHTN1/GCH1/PREX1/BDNF/AKT3/VEGFA/PRKCE/FN1/P2RX7/WNT9B/HMOX1/TWF1/EDN1/TWF2/SRF/CREB1/MSN/ILK/PTGS2/SLC8A1/RB1CC1/RAB5A/DNM2/BMPR2/AKT1/LRRK2/PFN1/EDNRA/RHOA/CXCL12/CDK4/VAV3/HSP90AB1/PEX11B/NPPC/VASP/CDC42EP4/ABI2/HMGCR/SPIRE1/NDEL1/LIMA1/CAPZB/PPP1R9A/SPART/RNF6/RAB11A/WNT5A/SPP1/CAPZA…	297
GO:2000278	regulation of DNA biosynthetic process	biological process	80/9065	102/17381	3.38611e-08	1.37767e-06	9.91639e-07	1.50382	CDKN1A/GJA1/ATM/KLF4/HNRNPD/PRKD2/HNRNPU/TP53/PPARG/MAPK3/MAPK1/BMPR2/RFC5/RFC4/HSP90AB1/CHTF18/DSCC1/CCT3/RGN/RFC2/HNRNPA1/SRC/MYC/HSP90AA1/TNKS/HNRNPC/PTGES3/CTNNB1/WRAP53/CCT5/SMG5/CTC1/CCT7/EXOSC10/CCT4/CCT2/CCT6A/TCP1/XRCC5/SMG6/PINX1/NVL/PAPD5/NEK7/MAP3K4/AURKB/HNRNPA2B1/PARP4/DUSP1/MAP2K7/TFDP1/DDX39B/HMBOX1/GNL3L/PARM1/GREM1/MAPKAPK5/MEN1/FGFR4/ARRB2/PDGFB/SH2B1/POT1/STN1/XRN1/NAT10/FAM12…	80
GO:0001501	skeletal system development	biological process	315/9065	491/17381	3.404e-08	1.37829e-06	9.92086e-07	1.23009	MEF2C/HDAC4/HOXA5/FOXP1/RARG/PPIB/ANXA2/CYR61/HAND2/IGF1/SH3PXD2B/SNX19/HOXD10/SUFU/HOXB8/ZEB1/CHSY1/CHST11/SERP1/HOXA7/HOXD8/HOXC8/SOX6/FGFR1/INPPL1/MED1/RUNX3/EP300/HMGA2/MMP13/FGF2/KLF10/COL1A1/HOXB7/CDKN1C/P2RX7/ETS2/WNT9B/EDN1/HOXA10/IGF2/BMP7/HIF1A/SRF/SOX9/MAPK3/PDGFRA/SP3/ACVR2B/CD44/FGF9/TGFBR2/TEK/CTGF/VKORC1/BMPR2/SMAD5/SNAI2/RUNX2/WASF2/SMAD2/RHOA/TGFBR1/NIPBL/DLX1/EPHA2/NSD2/NPPC/SIX…	315
GO:1902850	microtubule cytoskeleton organization involved in mitosis	biological process	93/9065	122/17381	3.45382e-08	1.39177e-06	1.00179e-06	1.46161	STMN1/PLK2/CDC14A/KIF23/CDC14B/HSPA1A/TTK/CCSAP/KIF2A/MECP2/HNRNPU/PAX6/RHOA/PCNT/RACGAP1/PSRC1/NDC80/KIF11/CDC20/WDR62/RCC1/BORA/SPC25/TACC3/ESPL1/SUN2/NDEL1/RAN/GNAI1/NUP62/RAB11A/SPRY2/FLNA/KIF4A/ZNF207/CLTC/CHMP2A/CCNB1/SMC3/NDE1/TNKS/ARHGEF2/HSPA1B/KPNB1/SMC1A/DYNC1H1/PLK1/HTT/MAP4/TUBGCP6/STAG2/TPX2/CDK5RAP2/SPRY1/TPR/AURKA/AURKB/PRC1/SETD2/BIRC5/PAFAH1B1/KIF3B/CHMP2B/CENPA/CHMP4B/CHEK2/PKD…	93
GO:0006611	protein export from nucleus	biological process	129/9065	179/17381	3.60024e-08	1.44192e-06	1.03789e-06	1.3818	PPM1A/ANP32B/XPO6/POM121/UHMK1/EGR2/SRSF11/CPSF1/SRSF9/TP53/SRSF1/MDM2/SRSF7/DDX39A/NDC1/POLR2D/DNAJC27/BARD1/XPO1/STRADB/NUP58/NMD3/RBM8A/SOX4/HHEX/WDR33/GLE1/STYX/SRSF2/RAN/SRSF3/NUP62/SRSF6/IFI27/SRRM1/SYMPK/CPSF3/SLBP/CALR/EMD/SRSF4/ZC3H11A/NUP50/NOP53/POM121C/EIF4E/NUP160/NUP210/XPOT/SRSF5/SFN/NUP153/PRKACA/TGFB1/U2AF2/RNPS1/PTPN11/SMG5/CSE1L/NCBP2/RANBP2/NPM1/YWHAE/XPO7/SMG1/XPO5/PABPN1/PAR…	129
GO:0001666	response to hypoxia	biological process	227/9065	341/17381	3.64321e-08	1.44192e-06	1.03789e-06	1.27638	CXCR4/GATA6/MYB/UCP2/TLR2/E2F1/FOXO3/IRAK1/DNMT3A/BCL2/DNMT3B/PAK1/THBS1/PKM/ATM/ITPR1/VEGFA/EP300/PRKCE/ETS1/HSP90B1/MECP2/CCNA2/VCAM1/PLAU/CREBBP/BACH1/HMOX1/CDKN1B/PPARA/EDN1/NF1/TP53/BMP7/HIF1A/CUL2/SRF/SMAD4/CREB1/SIRT1/SLC2A4/PTGS2/EGLN2/SLC8A1/TGFBR2/TEK/NOTCH1/PMAIP1/AKT1/MDM2/EDNRA/CXCL12/HYOU1/TERT/NPPC/TGFBR3/APOLD1/EGLN3/PSMD9/PRKAA1/HIF1AN/AGTRAP/ACTN4/NOP53/SLC29A1/ANGPTL4/HIGD1A/MY…	227
GO:0061387	regulation of extent of cell growth	biological process	72/9065	90/17381	3.64437e-08	1.44192e-06	1.03789e-06	1.5339	NTRK3/WNT3A/RAB21/PAK1/NRP1/SHTN1/BDNF/VEGFA/FN1/TWF2/SRF/ILK/DNM2/BMPR2/CXCL12/NDEL1/SPART/RNF6/RAB11A/WNT5A/SPP1/PLXNA4/CDH4/CTTN/IST1/SEMA4D/L1CAM/EPHA7/TTL/MAP1B/TRPC5/CYFIP1/ZFYVE27/WDR36/MEGF8/ABL1/GOLGA4/PLXNA1/NKX6-1/DPYSL2/APOE/PAFAH1B1/CDK5R1/GDI1/SEMA7A/LIMK1/PTPRS/PLXNA2/MAPT/SEMA5A/SEMA4F/DRAXIN/DISC1/NTN1/WNT3/FSTL4/RTN4R/SEMA3F/MAG/TRPV2/RND2/EFNA5/BARHL2/RTN4/ISLR2/ULK2/PLXNA3/TNF…	72
GO:0021953	central nervous system neuron differentiation	biological process	124/9065	171/17381	3.64675e-08	1.44192e-06	1.03789e-06	1.39038	DRD1/HES1/WNT3A/ZEB2/NRP1/HOXD10/SUFU/PTK2/WNT9B/ERBB4/PTCH1/NTRK2/PAX6/DLX1/LEF1/HPRT1/SOX4/UQCRQ/EPHA4/NDEL1/ADARB1/NFIB/BCL11B/WNT5A/FGFR2/DKK1/PLXNA4/C12orf57/LHX4/RAPGEF2/GLI2/FBXO45/FOXN4/ABT1/AXIN1/SATB2/SALL1/CHD5/CTNNB1/NANOS1/GBA2/HERC1/GIGYF2/ROBO2/MTPN/PTEN/DLX2/ID4/TCTN1/SMO/DYNC2H1/NR4A2/INHBA/GDF7/TSKU/NKX6-1/SFRP1/WNT1/TAL1/CDH11/BTG2/PAFAH1B1/CSNK1E/ATP7A/RORA/SALL3/FOXG1/RAC3/RO…	124
GO:0051091	positive regulation of DNA binding transcription factor activity	biological process	170/9065	246/17381	3.90545e-08	1.537e-06	1.10632e-06	1.32501	S100A9/WNT3A/IRAK2/KRAS/TLR2/HDAC4/ESR1/TRAF6/IRAK1/HSPA1A/VEGFA/EP300/IKBKB/APP/PRKD2/NFKB1/RPS6KA5/DVL2/UBE2I/CLOCK/EDN1/CD40LG/CHUK/PPARG/SRF/TLR4/NFKBIA/MTDH/AKT1/PRDX3/NFKB2/NLRP3/IL6/LRP8/RNF41/WNT5A/KIT/ITGB2/TRIM22/JUP/TRIM26/AIM2/SMARCB1/MYOCD/RIPK2/ERC1/UBA52/UBB/HIPK2/ARHGEF2/HSPA1B/OPRD1/UBE2N/CTNNB1/TGFB1/SMARCA4/FER/JMY/MTPN/PPARGC1A/NPM1/TRIM27/TAF12/PARK7/RPS3/TICAM1/PTEN/PHB2/PPA…	170
GO:0043010	camera-type eye development	biological process	200/9065	296/17381	4.1772e-08	1.6363e-06	1.1778e-06	1.29552	NTRK3/TGIF2/ZEB2/WT1/JUN/CACNA1C/RARG/NRP1/GPD2/EGFR/ARID1A/ZNF513/ZEB1/PITX3/KLF4/MED1/VEGFA/HMGN1/CDKN1C/WNT9B/CDKN1B/JAG1/NF1/BMP7/HIF1A/SRF/SOX9/PDGFRA/SP3/ACVR2B/HDAC1/NTRK2/MERTK/TGFBR2/PAX6/BMPR2/FOXF2/TGFBR1/CDK4/BAX/DLX1/EPHA2/MAX/CLIC4/NF2/LPCAT1/PAPD4/BCL11B/WNT5A/FRS2/FBN1/ATP2B4/C12orf57/HDAC2/CRYGS/MFN2/GNB1/GNAT2/GATA3/KDM2B/FOXN4/THY1/RDH10/TSPAN12/XRN2/HIPK2/SKI/TUB/CTNNB1/FBN2/F…	200
GO:0045216	cell-cell junction organization	biological process	162/9065	233/17381	4.22771e-08	1.64841e-06	1.18652e-06	1.33311	CDC42/BCL2/PDCD6IP/ROCK1/THBS1/NRP1/CORO1C/GJA1/SDC4/VEGFA/FSCN1/IKBKB/CADM1/CSK/PTK2/TJP1/FERMT2/SRF/EPB41L3/KDR/MTDH/TEK/PTPRK/SNAI2/RHOA/TGFBR1/LIMS1/GJB2/ACTN1/ECT2/CDH1/NF2/RASSF8/MPP5/HEG1/CBFB/DLC1/RCC2/UGT8/PARD6B/DMTN/JUP/F2RL1/CDH4/ACTN4/DSG2/PHLDB2/RHOC/CTTN/TBCD/CDH13/F11R/THY1/CDH2/SRC/CAV1/VCL/ZNF703/TLN1/PDPK1/PRKACA/PKP2/CTNNB1/TGFB1/PIP5K1A/CTNNA1/TSC1/SMAD3/PIP5K1C/PRKCA/PTEN/CT…	162
GO:0000086	G2/M transition of mitotic cell cycle	biological process	171/9065	248/17381	4.56539e-08	1.77188e-06	1.27539e-06	1.32206	CDC25A/CCND1/CDKN1A/WEE1/ACTR1A/CENPJ/CEP63/RAD51C/CDK6/SSNA1/TUBA1A/BRCA1/ATM/HMGA2/CDK14/MECP2/APP/CCNA2/ALMS1/CALM3/BACH1/CALM2/MAPRE1/DNM2/CDK4/CCP110/PCNT/DONSON/FANCI/PKMYT1/MELK/CDK1/CEP41/TICRR/BORA/HAUS8/BLM/BTRC/PSMD9/CKAP5/RAB11A/RCC2/SIN3A/SFI1/MRE11/NOP53/CENPF/PPP2R2A/PSME1/CCNB1/CDC25B/TUBB/UBA52/PSMD3/HSP90AA1/UBB/NDE1/PSMB2/PRKACA/CCNY/PSMD4/PSMD11/BRD4/DYNC1H1/VPS4A/SKP1/PSMC1/C…	171
GO:0071456	cellular response to hypoxia	biological process	138/9065	194/17381	4.62569e-08	1.78704e-06	1.2863e-06	1.36391	GATA6/E2F1/FOXO3/IRAK1/DNMT3A/BCL2/VEGFA/EP300/PRKCE/CCNA2/CREBBP/BACH1/HMOX1/EDN1/TP53/BMP7/HIF1A/CUL2/SIRT1/SLC2A4/PTGS2/EGLN2/SLC8A1/NOTCH1/PMAIP1/AKT1/MDM2/HYOU1/TERT/EGLN3/PSMD9/PRKAA1/HIF1AN/NOP53/SLC29A1/HIGD1A/GNB1/HIF3A/PSME1/HP1BP3/CCNB1/SRC/CHCHD2/MYC/UBA52/PSMD3/UBB/HIPK2/PSMB2/MTOR/OPRD1/PSMD4/PSMD11/ENO1/LIMD1/PSMC1/PPARGC1A/PSMB3/PSMA7/TIGAR/PSMC5/PTEN/PHB2/PSMD2/UBC/PPARD/PSMD6/UB…	138
GO:0010639	negative regulation of organelle organization	biological process	226/9065	340/17381	4.69894e-08	1.80705e-06	1.30071e-06	1.27449	DNMT1/STMN1/MET/CCNF/CHEK1/H3F3B/HSPA1A/MSH2/OMA1/DNMT3B/SET/TTK/IGF1/TMSB4X/BRCA1/ATM/MECP2/LIF/TWF1/HNRNPU/TWF2/BMP7/SPI1/SMAD4/SIRT1/OTUB1/HMGA1/MAPRE1/DNM2/AKT1/LRRK2/PFN1/WASF2/CCP110/TRIP13/NDC80/BUB1B/TOP2A/FBXO5/CDT1/ESPL1/SMCR8/LIMA1/MID1IP1/CAPZB/ASF1A/PPP1R9A/TOM1L2/RNF41/JARID2/DLC1/CAPZA1/PRELID1/DMTN/SIN3A/DYNC1LI1/MAD2L1/CENPF/TRIM9/PHLDB2/ZNF207/SMARCB1/CAPG/TMOD3/PLEKHH2/CHMP2A/N…	226
GO:0071496	cellular response to external stimulus	biological process	195/9065	288/17381	4.82195e-08	1.84593e-06	1.32869e-06	1.29822	UCP2/CDKN1A/FADD/CHEK1/HDAC4/BCL2/JUN/FOXO1/EHMT2/EGFR/KCNJ2/GJA1/AXL/MED1/KLF10/COL1A1/PIM1/P2RX7/NFKB1/WNT9B/HMOX1/FAS/TP53/PPARG/SRF/SOX9/MAPK3/PIEZO1/SIRT1/MAPK1/TLR4/PTGS2/FOS/PMAIP1/BMPR2/AKT1/LRRK2/SNAI2/MDM2/MMP7/MAPK8/GADD45A/ATP1A1/SESN2/MAX/KANK2/IL6/PRKAA1/HABP4/GLUL/FNIP1/BGLAP/CNN2/GSTP1/STK24/USP33/ITGA6/RALB/DCTPP1/FADS1/MYOCD/FOLR1/TRIM24/HNRNPA1/ATG7/SREBF1/MTOR/TGFB1/XBP1/HSPA8…	195
GO:0015931	nucleobase-containing compound transport	biological process	163/9065	235/17381	4.97898e-08	1.89742e-06	1.36575e-06	1.32992	SLC35A1/SLC35B3/GJA1/POM121/SRSF11/CPSF1/P2RX7/SRSF9/SRSF1/SRSF7/DDX39A/NDC1/POLR2D/XPO1/NUP58/NMD3/SLC35D2/RBM8A/HHEX/WDR33/SLC35D1/GLE1/CKAP5/SRSF2/RAN/SRSF3/NUP62/SRSF6/MX2/SRRM1/SYMPK/CPSF3/SLBP/SLC25A19/G3BP2/SRSF4/ZC3H11A/NUP50/NOP53/NXT2/POM121C/SLC29A1/HNRNPA1L2/EIF4E/NUP160/NUP210/XPOT/SRSF5/HNRNPA1/HNRNPA3/IGF2BP3/IGF2BP1/TNKS/NUP153/SLC35B4/RANBP3/U2AF2/RNPS1/SMG5/IGF2BP2/NCBP2/RANBP2/…	163
GO:0048638	regulation of developmental growth	biological process	208/9065	310/17381	5.28125e-08	2.00354e-06	1.44214e-06	1.2865	NTRK3/MEF2C/GATA6/WNT3A/RAB21/BCL2/WT1/PAK1/SOD1/PPIB/NRP1/AGRN/FGF20/IGF1/SH3PXD2B/GJA1/SHTN1/SERP1/BDNF/G6PD/FGFR1/VEGFA/CPNE6/APP/FN1/FGF2/PTK2/AGR2/PIM1/CSF1/ZFPM2/EDN1/TWF2/ERBB4/SRF/CREB1/PTCH1/BCL2L11/ILK/FGF9/TGFBR2/TP73/NOTCH1/STAT3/DNM2/BMPR2/AKT1/TGFBR1/CXCL12/NIPBL/CDK4/EPPK1/BASP1/PHLDA2/NPPC/TGFBR3/CDK1/SIX1/SIX4/NDEL1/SPART/JARID2/RNF6/RAB11A/WNT5A/SPP1/FGFR2/RIMS2/PLXNA4/CDH4/GPAT…	208
GO:0003279	cardiac septum development	biological process	77/9065	98/17381	5.3141e-08	2.00697e-06	1.4446e-06	1.50651	HES1/ACVR1/GATA6/GATA4/NRP1/NOTCH2/CYR61/SUFU/ZFPM2/JAG1/BMP7/SMAD4/TGFBR2/NOTCH1/DNM2/BMPR2/MDM2/TGFBR1/NSD2/TGFBR3/NRP2/SOX4/HEG1/LUZP1/WNT5A/FRS2/FGFR2/PARVA/GATA3/HAND1/AP2B1/SALL1/TBX1/TBX2/BMPR1A/PLXND1/NDST1/PTK7/SMO/DCTN5/MAML1/LRP2/PRDM1/VANGL2/RARB/SMAD6/CHD7/SOX11/NOG/FGFRL1/SMAD7/ZFPM1/HEY2/CITED2/NPHP3/PAX8/TBX20/RARA/HEYL/ENG/NPRL3/NKX2-5/TAB1/EGLN1/PITX2/FZD1/FZD2/TRIP11/DHRS3/MSX2…	77
GO:0051403	stress-activated MAPK cascade	biological process	178/9065	260/17381	5.46391e-08	2.04942e-06	1.47516e-06	1.31266	IRAK2/CDC42/TRAF6/IRAK1/ZEB2/PDCD4/PAK1/MAP3K8/FOXO1/HACD3/EGFR/HAND2/MAP2K1/VEGFA/IKBKB/APP/NFKB1/IGF1R/DVL2/EDN1/CD40LG/CHUK/FAS/HRAS/MAP3K11/CRKL/MAPK3/MAPK1/TLR4/TP73/CTGF/RB1CC1/AKT1/MAPK8/GADD45A/HMGB1/HMGCR/BTRC/PHLPP1/EPHA4/RASSF2/WNT5A/MAP3K21/GSTP1/F2RL1/DKK1/PDCD10/PTPN22/ZNF622/HIPK3/PTPN1/RIPK2/MAP4K2/AXIN1/MYC/UBA52/UBB/HIPK2/MINK1/TIAM1/QARS/UBE2N/SKP1/MID1/DUSP3/MAP3K2/TAOK3/RPS3/…	178
GO:0043484	regulation of RNA splicing	biological process	90/9065	118/17381	5.47518e-08	2.04942e-06	1.47516e-06	1.4624	HSPA1A/TIA1/PTBP2/PTBP1/DDX5/RBM4/SRSF9/HNRNPU/TRA2B/SRSF1/RBFOX2/SRSF7/HNRNPL/RBM8A/SON/MBNL1/SRSF2/HABP4/SRSF3/SRSF6/YTHDC1/HNRNPH1/RBM42/ZNF326/SRSF4/SREK1/BRDT/PQBP1/SRSF5/HNRNPA1/DYRK1A/RBM5/CDK12/POLR2A/SF3A1/DDX17/RRP1B/U2AF2/HSPA8/RNPS1/NPM1/AHNAK/RBM10/SNRNP70/DAZAP1/PRPF19/METTL16/EIF4A3/NSRP1/PTBP3/SAP18/FASTK/C1QBP/RPS26/TMBIM6/CLK1/SRPK1/RBMX/RBM15B/HNRNPF/RBM17/HNRNPA2B1/NUP98/JMJD6…	90
GO:1905269	positive regulation of chromatin organization	biological process	71/9065	89/17381	5.63227e-08	2.09889e-06	1.51077e-06	1.52959	DNMT1/MYB/CDK9/DNMT3B/BRCA1/ATM/VEGFA/MECP2/PRKD2/LIF/RPS6KA5/TP53/SMAD4/MAPK3/BRD7/SIRT1/LRRK2/SNAI2/NIPBL/PHF19/JARID2/SIN3A/HIST1H1B/PAXBP1/KAT2A/SMARCB1/GATA3/CTBP1/MIER1/CCNB1/KMT2A/SREBF1/WBP2/TRIM28/UBE2N/CTNNB1/TGFB1/NELFE/PPARGC1A/RIF1/AKAP8/CHTOP/RUVBL2/SETDB1/RNF40/SART3/AKAP8L/TPR/ARRB1/TAL1/BCL6/FMR1/OGT/TADA2B/KAT7/MUC1/RNF20/RPS6KA4/PAX7/TADA2A/SDR16C5/PIWIL2/TET1/C6orf89/JDP2/EED/…	71
GO:1903706	regulation of hemopoiesis	biological process	289/9065	448/17381	5.82387e-08	2.16073e-06	1.55528e-06	1.23688	MEF2C/LMO2/HES1/MYB/HLA-G/FADD/FOXO3/ANXA1/TRAF6/H3F3B/JUN/CDK6/HOXA5/SOD1/FOXP1/MAFB/RARG/THBS1/MOV10/ASH2L/AP3D1/AP3B1/HOXA9/HOXB8/ZEB1/HIST1H3B/AXL/HOXA7/MED1/EP300/PNP/ETS1/CYLD/KLF10/LIF/CSF1/CREBBP/NFATC2/JAG1/NF1/FAS/ERBB2/HIF1A/SPI1/CREB1/HDAC1/RB1/TLR4/NFKBIA/TGFBR2/TP73/IFNG/NOTCH1/STAT3/FOS/RBFOX2/CD46/CEBPB/ZFP36L2/FANCA/HMGB1/LEF1/RBBP5/SENP1/NLRP3/TJP2/FANCD2/IL6/PSMD9/AGO1/KMT2D/RN…	289
GO:0032434	regulation of proteasomal ubiquitin-dependent protein catabolic process	biological process	88/9065	115/17381	5.86781e-08	2.16749e-06	1.56014e-06	1.46721	PLK2/CEBPA/HSPA1A/RNF138/ANKIB1/PIAS1/FHIT/N4BP1/TRIB2/AKT1/LRRK2/MDM2/TAF9/HSP90AB1/SENP1/SOCS4/CSNK1A1/BAG5/NOP53/SMARCC1/GLMN/CAV1/CCAR2/BAG6/RACK1/UBQLN4/DVL1/RAD23A/USP5/PLK1/KEAP1/PARK7/UBQLN2/UBQLN1/CLEC16A/ARAF/ARIH2/UBXN1/AURKA/UBE2K/SUMO2/FBXO22/RAD23B/VCP/WNT10B/GSK3B/HFE/WAC/ARIH1/LONRF2/CSNK1E/LONRF1/SDCBP/PRICKLE1/SOCS5/TRIB3/SMAD7/USP14/UFL1/RYBP/GBA/DDA1/SUMO1/RNF217/RNF144B/HERPU…	88
GO:0036294	cellular response to decreased oxygen levels	biological process	142/9065	201/17381	5.97303e-08	2.19672e-06	1.58118e-06	1.35456	GATA6/E2F1/FOXO3/IRAK1/DNMT3A/BCL2/VEGFA/EP300/PRKCE/CCNA2/CREBBP/BACH1/HMOX1/EDN1/TP53/BMP7/HIF1A/CUL2/SIRT1/SLC2A4/PTGS2/EGLN2/SLC8A1/NOTCH1/PMAIP1/AKT1/MDM2/HYOU1/TERT/EGLN3/PSMD9/PRKAA1/HIF1AN/NOP53/SLC29A1/HIGD1A/GNB1/HIF3A/PSME1/HP1BP3/CCNB1/SRC/CHCHD2/MYC/UBA52/PSMD3/UBB/HIPK2/PSMB2/MTOR/OPRD1/PSMD4/PSMD11/ENO1/LIMD1/PSMC1/PPARGC1A/PSMB3/PSMA7/TIGAR/TSC1/PSMC5/PTEN/PHB2/PSMD2/UBC/PPARD/PSM…	142
GO:0044839	cell cycle G2/M phase transition	biological process	176/9065	257/17381	6.26313e-08	2.29339e-06	1.65077e-06	1.31307	CDC25A/CCND1/CDKN1A/WEE1/ACTR1A/CENPJ/CEP63/RAD51C/CDK6/SSNA1/TUBA1A/BRCA1/ATM/HMGA2/CDK14/MECP2/APP/CCNA2/ALMS1/CALM3/BACH1/TP53/CALM2/MAPRE1/DNM2/CDK4/CCP110/PCNT/DONSON/FANCI/PKMYT1/MELK/CDK1/CEP41/TICRR/BORA/HAUS8/BLM/BTRC/PSMD9/CKAP5/RAB11A/RCC2/SIN3A/SFI1/MRE11/NOP53/CENPF/PPP2R2A/PSME1/CCNB1/CDC25B/TUBB/UBA52/PSMD3/HSP90AA1/UBB/NDE1/PSMB2/PRKACA/CCNY/PSMD4/PSMD11/BRD4/DYNC1H1/VPS4A/SKP1/PS…	176
GO:0009266	response to temperature stimulus	biological process	156/9065	224/17381	6.29807e-08	2.29621e-06	1.6528e-06	1.33531	UCP2/TP53INP1/CDKN1A/IRAK1/HSPA1A/SOD1/FOXO1/THBS1/DNAJB1/IGF1/POM121/ATM/EP300/HSPD1/CREBBP/HMOX1/NF1/PPARG/MAPK3/SIRT1/MAPK1/NFKBIA/PTGS2/FOS/AKT1/CXCL12/IER5/NDC1/POLR2D/RBBP7/PSIP1/NUP58/HSP90AB1/IL6/RPA2/PRKAA1/NUP62/BAG5/MKI67/NUP50/ACADVL/HDAC2/POM121C/IGFBP7/TRPA1/NUP160/NUP210/CAMK2G/CCL2/DNAJB4/TMEM135/HSP90AA1/CCAR2/FKBP4/EIF2B5/NUP153/MTOR/PRKACA/PTGES3/HSPA1B/HTRA2/EIF2B2/LRP11/HSPA8…	156
GO:0001763	morphogenesis of a branching structure	biological process	137/9065	193/17381	6.36847e-08	2.31187e-06	1.66407e-06	1.36104	MET/ACVR1/KRAS/ESR1/BCL2/WT1/HOXA5/PAK1/GRB2/NRP1/RERE/NOTCH4/FGFR1/MED1/VEGFA/FGF2/HOXB7/CSF1/DDR1/WNT9B/EDN1/BMP7/FGF7/SRF/SMAD4/SOX9/PTCH1/ILK/TGFBR2/NOTCH1/LRRK2/SNAI2/EDNRA/LEF1/EPHA2/SIX1/CLIC4/BTRC/MYCN/IL6/HHEX/SIX4/WNT5A/FRS2/PGR/SPRY2/FGFR2/B4GALT1/ERMN/GLI2/GNA13/SRC/BCL11A/LGR4/RDH10/EPHA7/TIMELESS/MYC/MAGED1/SALL1/HOXD11/CTNNBIP1/CTNNB1/TGFB1/PLXND1/COL4A1/NRARP/PHB2/DLX2/SPRY1/SMO/A…	137
GO:0021543	pallium development	biological process	119/9065	164/17381	6.44231e-08	2.32863e-06	1.67614e-06	1.39127	DRD1/WNT3A/ZEB2/CDK6/LRP1/NRP1/EGFR/EZH2/PEX13/NF1/HIF1A/SRF/NTRK2/TRA2B/BTBD3/PAX6/CSNK2A1/BAX/DLX1/SYNE2/LEF1/ASPM/WDR62/TACC3/TACC1/NF2/UQCRQ/SUN2/NDEL1/LRP8/PAPD4/EZH1/KDM6B/BCL2A1/BCAN/KIF5B/ATP2B4/FLNA/UBA6/FBXO45/CSNK2A2/CDH2/NR4A3/CEP120/IGF2BP1/XRN2/LAMB1/EIF2B5/NDE1/GART/CTNNB1/COL3A1/PHLPP2/YWHAE/XRCC1/MDK/SLC38A2/TSC1/PTEN/SUN1/DLX2/SLC2A1/ID4/SMO/GNG12/SRGAP2/TRAPPC9/CASP3/GSK3B/BTG2…	119
GO:2001234	negative regulation of apoptotic signaling pathway	biological process	148/9065	211/17381	6.6293e-08	2.38598e-06	1.71742e-06	1.34489	ACVR1/FADD/BCL2/HSPA1A/MCL1/SOD2/BCL2L2/THBS1/NRP1/IGF1/BRCA1/MAPK7/PEA15/HMOX1/FAS/HIF1A/SERPINE1/SIRT1/PTGS2/CD44/RB1CC1/AKT1/LRRK2/SNAI2/MDM2/TGFBR1/CXCL12/TAF9/DDX3X/BAX/STRADB/HYOU1/TERT/ZNF385A/PRELID1/GSTP1/BAG5/ITGA6/CTTN/NOC2L/PTPN1/SRC/TMEM14A/ITGAV/PHIP/CCAR2/ARHGEF2/BCL2L12/QARS/NONO/HSPA1B/HTRA2/LGALS3/MIF/CTNNB1/ENO1/CTNNA1/XBP1/MEIS3/HTT/URI1/TPT1/UNC5B/GPX1/SLC25A5/PARK7/DNAJA1/YB…	148
GO:0030330	DNA damage response, signal transduction by p53 class mediator	biological process	84/9065	109/17381	6.65789e-08	2.38608e-06	1.71748e-06	1.47761	SPRED1/PLK2/MYO6/CDKN1A/E2F1/FOXO3/CENPJ/BRCA2/BRCA1/DDX5/ATM/EP300/CNOT6/CDKN1B/TP53/SIRT1/CD44/TP73/PMAIP1/SNAI2/MDM2/BAX/GADD45A/KMT5A/SESN2/CDK1/PCNA/SOX4/TNKS1BP1/SMYD2/CNOT4/ZNF385A/SPRED2/SFN/CCNB1/DYRK1A/UBA52/UBB/HIPK2/CNOT1/MIF/USP10/ATRX/E2F8/NPM1/CASP2/CNOT8/CNOT9/RPL26/UBC/PRMT1/AURKA/FOXM1/CNOT6L/CDK2/E2F4/CNOT11/CARM1/BTG2/TFDP1/RBL2/ARID3A/MDM4/SP100/HIC1/TFDP2/CHEK2/MUC1/NDRG1/SN…	84
GO:0060411	cardiac septum morphogenesis	biological process	56/9065	67/17381	6.80878e-08	2.42981e-06	1.74896e-06	1.60258	HES1/ACVR1/GATA6/GATA4/NRP1/NOTCH2/CYR61/ZFPM2/JAG1/BMP7/SMAD4/TGFBR2/NOTCH1/BMPR2/MDM2/TGFBR1/NSD2/TGFBR3/NRP2/SOX4/WNT5A/FGFR2/PARVA/HAND1/TBX1/TBX2/BMPR1A/SMO/LRP2/VANGL2/RARB/SMAD6/CHD7/SOX11/NOG/FGFRL1/SMAD7/ZFPM1/HEY2/CITED2/TBX20/RARA/HEYL/ENG/NKX2-5/EGLN1/PITX2/FZD1/FZD2/DHRS3/MSX2/TGFB2/PROX1/SAV1/HEY1/TBX3	56
GO:0042770	signal transduction in response to DNA damage	biological process	93/9065	123/17381	6.91383e-08	2.45689e-06	1.76845e-06	1.44972	SPRED1/PLK2/MYO6/CDKN1A/E2F1/FOXO3/CENPJ/CEP63/GRB2/BRCA2/BRCA1/CASP9/DDX5/ATM/EP300/CNOT6/CDKN1B/TP53/SIRT1/CD44/TP73/PMAIP1/SNAI2/MDM2/BAX/GADD45A/KMT5A/SESN2/CDK1/PCNA/SOX4/TNKS1BP1/SMYD2/CNOT4/ZNF385A/SPRED2/SFN/CCNB1/DYRK1A/UBA52/UBB/HIPK2/CNOT1/MIF/USP10/ATRX/CDC5L/E2F8/NPM1/CASP2/CNOT8/CNOT9/PRPF19/RPL26/UBC/ABL1/PRMT1/AURKA/FOXM1/CNOT6L/CDK2/E2F4/CNOT11/WNT1/CARM1/BTG2/TFDP1/RBL2/ARID3A/M…	93
GO:0061136	regulation of proteasomal protein catabolic process	biological process	122/9065	169/17381	7.16339e-08	2.52973e-06	1.82088e-06	1.38414	PLK2/CEBPA/HSPA1A/OSBPL7/RNF138/ANKIB1/PIAS1/FBXW7/FHIT/N4BP1/TRIB2/AKT1/LRRK2/MDM2/TAF9/HSP90AB1/SENP1/BTRC/SOCS4/CSNK1A1/BAG5/NOP53/SMARCC1/PSME1/UBAC2/GLMN/CAV1/UBB/CCAR2/BAG6/RACK1/UBQLN4/PRKACA/DVL1/XBP1/RAD23A/USP5/PSMC1/PLK1/GPX1/KEAP1/PARK7/UBQLN2/PSMC5/SCO1/TMF1/DERL2/UBQLN1/CLEC16A/PSMC4/ARAF/RNF40/PSME3/ARIH2/UBXN1/AURKA/UBE2K/SUMO2/USP19/FBXO22/RAD23B/PSMC3/VCP/WNT10B/USP25/GSK3B/HFE/…	122
GO:0006470	protein dephosphorylation	biological process	174/9065	254/17381	7.17888e-08	2.52973e-06	1.82088e-06	1.31348	PTPN12/CDC25A/CDC14A/BCL2/CDC14B/ROCK1/PPM1A/PTPRF/IKBKB/HSP90B1/CALM3/PPP2R5A/PTPN13/CDKN3/PTPN7/CALM2/PTPRK/PPTC7/HSP90AB1/PPA2/TIMM50/CTDSP2/CDCA2/BTRC/PHLPP1/CRY2/RPRD1B/DUSP8/PTP4A1/PPP6R3/PPP1R15B/PTPRG/STYX/CPPED1/MTMR4/PTPN4/PTPRD/SLC39A10/NUAK1/PTPN9/DLC1/PTPRR/SYMPK/PTPMT1/PPM1H/RGN/PPP2R2A/MINPP1/ITGA1/PTPN22/CTDNEP1/PTPN1/PLPP2/CAMK2G/CALM1/CYCS/CDC25B/PTP4A2/DUSP7/PPP1CA/ILKAP/PPM1M/…	174
GO:0009408	response to heat	biological process	117/9065	161/17381	7.21934e-08	2.53339e-06	1.82352e-06	1.39337	TP53INP1/CDKN1A/IRAK1/HSPA1A/SOD1/THBS1/DNAJB1/IGF1/POM121/ATM/EP300/CREBBP/HMOX1/NF1/MAPK3/SIRT1/MAPK1/PTGS2/AKT1/CXCL12/IER5/NDC1/POLR2D/RBBP7/PSIP1/NUP58/HSP90AB1/IL6/RPA2/NUP62/BAG5/MKI67/NUP50/HDAC2/POM121C/IGFBP7/NUP160/NUP210/CAMK2G/CCL2/DNAJB4/HSP90AA1/CCAR2/FKBP4/EIF2B5/NUP153/MTOR/PRKACA/PTGES3/HSPA1B/HTRA2/EIF2B2/LRP11/HSPA8/RANBP2/DNAJA3/YWHAE/DNAJA1/NUP214/AAAS/HSPH1/NUP37/HSPA1L/MAP…	117
GO:0000184	nuclear-transcribed mRNA catabolic process, nonsense-mediated decay	biological process	91/9065	120/17381	7.48349e-08	2.61519e-06	1.88239e-06	1.45401	RBM8A/EIF4G1/PPP2R2A/RPS8/PNRC1/RPS2/DHX34/UBA52/RPL36A/RPL29/RPL18A/SECISBP2/RPL3/RPS6/RPL4/RPLP1/RPS14/RPL7A/RPL10/RPL18/RPL37/RPL13/PABPC1/RPS27/RPL8/RPS15A/RPS5/RPL10A/RNPS1/SMG5/NCBP2/RPS18/RPS10/RPS3A/SMG1/RPS28/RPLP0/RPS4X/RPL9/RPL23A/RPL27A/RPS3/EXOSC10/CASC3/RPL26/RPL12/RPL22/EIF4A3/RPL31/RPL35A/RPS9/RPL34/RPS12/SMG6/RPL15/PPP2CA/RPL36/RPS21/RPL5/RPL32/RPS26/RPL14/RPS7/RPL27/RPS17/RPL13A…	91
GO:0030902	hindbrain development	biological process	105/9065	142/17381	7.61696e-08	2.65021e-06	1.9076e-06	1.41778	HES1/BCL2/PAK1/MAFB/PTBP2/ARCN1/RERE/EGR2/MAP2K1/EZH2/MECP2/HNRNPD/PSMG1/BMP7/SCRIB/RBFOX2/LPAR1/LEF1/ZNF365/UQCRQ/NFIB/DLC1/WLS/KAT2A/FLNA/GLI2/KDM2B/ITGB1/EN2/GART/CKB/AARS/CTNNB1/NANOS1/HERC1/PTPN11/MTPN/PPARGC1A/COQ8B/XRCC1/MDK/FOXC1/ALDH1A2/SPTBN2/SEMA4C/GNPAT/SMO/ABL1/SDF4/SERPINE2/SEC24B/HSPA5/SMAD1/WNT1/GLI1/FZD4/ATP7A/RORA/CDK5R1/SOCS7/NOG/LRP6/PTPRS/AGTPBP1/PLXNA2/ATIC/LDB1/EGF/SSTR1/NE…	105
GO:0006403	RNA localization	biological process	160/9065	231/17381	7.64665e-08	2.65021e-06	1.9076e-06	1.32805	POM121/ATM/SRSF11/CPSF1/SRSF9/HNRNPU/SRSF1/SRSF7/DDX39A/NDC1/POLR2D/XPO1/NUP58/NMD3/RBM8A/CCT3/HHEX/WDR33/GLE1/CKAP5/SRSF2/RAN/SRSF3/ZNF385A/NUP62/SRSF6/MX2/SRRM1/SYMPK/CPSF3/SLBP/G3BP2/SRSF4/ZC3H11A/NUP50/NOP53/NXT2/POM121C/HNRNPA1L2/EIF4E/NUP160/NUP210/XPOT/SRSF5/HNRNPA1/HNRNPA3/IGF2BP3/IGF2BP1/TNKS/NUP153/MEX3D/RANBP3/WRAP53/U2AF2/CCT5/NOP10/RNPS1/SMG5/IGF2BP2/NCBP2/RANBP2/NPM1/CCT7/XPO7/SMG1/…	160
GO:0043523	regulation of neuron apoptotic process	biological process	138/9065	195/17381	7.70692e-08	2.66015e-06	1.91476e-06	1.35691	MEF2C/MYB/KRAS/CDC42/FOXO3/HDAC4/BCL2/JUN/MCL1/MSH2/ROCK1/SOD1/SOD2/SET/LRP1/NRP1/FGF20/CASP9/PITX3/TRIM2/AXL/BDNF/G6PD/ATM/ERBB3/FBXW7/MECP2/SIGMAR1/HMOX1/NF1/HRAS/TP53/MAP3K11/HIF1A/BCL2L11/NTRK2/ILK/EGLN2/TP73/NTF3/CEBPB/BAX/DLX1/HYOU1/HSP90AB1/TERT/PRNP/SIX1/SIX4/EGLN3/ITGA1/GATA3/KDM2B/CCL2/NR4A3/EPHA7/HIPK2/GPI/EN2/PDPK1/AARS/NONO/BRAF/GSK3A/CTNNB1/PPARGC1A/CASP2/UNC5B/SYNGAP1/GPX1/PARK7/MD…	138
GO:0031346	positive regulation of cell projection organization	biological process	224/9065	338/17381	7.78242e-08	2.67525e-06	1.92563e-06	1.27069	NTRK3/WNT3A/CDC42/ANLN/HDAC4/ZEB2/RAB21/PAK1/NRP1/CORO1C/AGRN/SHTN1/BDNF/MAP2K1/FGFR1/VEGFA/FSCN1/EZH2/CPNE6/FN1/DPYSL3/P2RX7/ARHGDIA/TWF2/HRAS/BMP7/SRF/NTRK2/ILK/RAP1A/DNM2/BMPR2/PFN1/WASF2/LPAR1/RHOA/TGFBR1/CXCL12/CCP110/PLXNC1/CDC42EP4/PLEK2/ITPKA/RAC2/IL6/EPHA4/NDEL1/LRP8/ATMIN/STK11/VLDLR/PPP1R9A/PTPRD/SEPT7/RAB11A/WNT5A/KIT/ABL2/RIMS2/F2RL1/NPTN/CDH4/KAT2A/TUBB2B/RAPGEF2/CAPRIN1/ITGA3/IST1/…	224
GO:0006986	response to unfolded protein	biological process	125/9065	174/17381	7.88056e-08	2.69797e-06	1.94198e-06	1.37742	CCND1/ATF6/HSPA1A/THBS1/DNAJB1/SERP1/EP300/HSP90B1/HSPD1/HSPA4/AGR2/ATF6B/CXCL8/TSPYL2/BCL2L11/IFNG/CREBRF/BAX/HYOU1/HSP90AB1/SEC31A/CTDSP2/PARP16/SEC61A1/TMEM33/PPP1R15B/SHC1/SEC61B/CALR/UGGT2/ACADVL/SEC62/MFN2/PTPN1/UGGT1/CCL2/SSR1/DNAJB4/PDIA6/HSP90AA1/TLN1/RACK1/DDX11/GSK3A/XBP1/HSPA8/DZIP3/SRPRA/MBTPS1/DNAJA1/FAF2/HSPH1/HSPA1L/HDGF/CXXC1/DERL2/VAPB/ATF3/BOK/ATF4/TMBIM6/SEC61A2/ERO1A/EXTL3/CO…	125
GO:0010001	glial cell differentiation	biological process	133/9065	187/17381	8.18373e-08	2.79042e-06	2.00853e-06	1.36369	CXCR4/DRD1/NTRK3/HES1/KRAS/AKT2/TLR2/SLC45A3/CDK6/SOD1/LRP1/F2/EGFR/SOX6/EGR2/MAP2K1/ERBB3/APP/CSK/WASF3/LIF/PRMT5/SOX2/NF1/DICER1/ERBB2/PPARG/SOX9/MAPK3/MAPK1/NTRK2/TLR4/SRSF1/ILK/TP73/NOTCH1/PAX6/STAT3/LDLR/AKT1/LPAR1/DLX1/LEF1/TNFRSF21/ZNF365/CDK1/MYCN/SOX4/EPHA4/NFIB/MPP5/GSTP1/DTX1/SH3TC2/HDAC2/GPC1/NAB1/CDH2/EIF2B5/RHEB/SKI/MTOR/CTNNB1/TGFB1/EIF2B2/PTPN11/METRN/TENM4/PRPF19/PTEN/CNP/DLX2/ID…	133
GO:0007050	cell cycle arrest	biological process	172/9065	251/17381	8.22811e-08	2.79424e-06	2.01128e-06	1.3139	GATA6/TP53INP1/PLK2/CDK9/AKT2/CCND1/CDKN1A/E2F1/CDC14A/CDC14B/CENPJ/MSH2/CDK6/PPM1A/THBS1/NOTCH2/BRCA1/UHMK1/ATM/MAP2K1/EP300/HMGA2/WDR6/CNOT6/PA2G4/CDKN1C/CXCL8/CDKN1B/SOX2/HRAS/CDKN3/TP53/CUL2/CDKN2A/RB1/ILK/TP73/IFNG/NOTCH1/MDM2/TGFBR1/RASSF1/CDK4/BAX/GADD45A/BARD1/STRADB/HSP90AB1/PRNP/CDK1/PCNA/SOX4/GAS1/TNKS1BP1/PRKAA1/STK11/TSG101/CNOT4/ZNF385A/CALR/PRKAG1/SFN/CCNB1/MYC/UBA52/UBB/RHEB/MTOR/…	172
GO:0061458	reproductive system development	biological process	279/9065	432/17381	8.41816e-08	2.8473e-06	2.04947e-06	1.2383	HES1/GATA6/CDX2/CEBPA/GATA4/CCND1/CCNF/FOXO3/PLAG1/ESR1/ANXA1/BCL2/WT1/H3F3B/MSH2/SOD1/BCL2L2/GRB2/RARG/EGFR/ARID1A/CYR61/BRCA2/GJA1/AXL/SERPINB5/ATM/MAP2K1/MED1/VEGFA/PTK2/CDKN1C/LIF/JUNB/ZFPM2/WNT9B/CDKN1B/HOXA10/IGF2/BMP7/HIF1A/PPARG/NRIP1/SMAD4/SOX9/PDGFRA/SP3/PTCH1/SIRT1/BCL2L11/TFAP2C/MAPK1/MERTK/PTGS2/FGF9/NOTCH1/SDC1/BMPR2/AKT1/FOXF2/TGFBR1/CEBPB/NIPBL/BAX/BASP1/FANCA/PRDX3/KRT19/PHLDA2/L…	279
GO:0043401	steroid hormone mediated signaling pathway	biological process	136/9065	192/17381	8.74985e-08	2.94765e-06	2.1217e-06	1.35814	ESR1/CCNE1/PAK1/FOXP1/RARG/ARID1A/BRCA1/DDX5/PIAS1/MED1/EP300/HNF4A/NR1I2/RXRB/MED16/PPARA/UBE2I/CLOCK/BMP7/PPARG/NRIP1/SIRT1/HDAC1/RB1/EGLN2/RBFOX2/NR6A1/CREBRF/LEF1/KANK2/CRY2/NR3C1/KMT2D/CBFB/RAN/RNF6/YWHAH/MED4/PGR/CALR/PGRMC2/NR5A2/UBR5/SRC/NR4A3/NR4A1/AXIN1/NCOA6/FKBP4/NCOA3/WBP2/DDX54/PAGR1/NR1D2/CNOT1/DDX17/CTNNB1/MED14/SMARCA4/PPARGC1A/KDM3A/RBM14/PARK7/CNOT9/PARP1/DNAJA1/AKAP13/PHB2/PPA…	136
GO:0030324	lung development	biological process	123/9065	171/17381	8.88324e-08	2.98066e-06	2.14546e-06	1.37916	HES1/GATA6/KRAS/CDC42/CEBPA/RIDA/HOXA5/EGFR/MAP2K1/FGFR1/VEGFA/EP300/AGR2/LIF/ZFPM2/FGF7/SRF/SOX9/MAPK3/PDGFRA/SP3/CREB1/ACVR2B/MAPK1/ERRFI1/IGFBP5/FGF9/TGFBR2/NOTCH1/CTGF/BMPR2/PDPN/SMAD2/AIMP2/HMGB1/MYCN/HHEX/NFIB/HEG1/SRSF6/WNT5A/PGR/SPRY2/FGFR2/EIF4E/MYOCD/GLI2/ITGA3/ARG1/STK40/RDH10/TIMELESS/PLOD3/BAG6/SREBF1/CTNNB1/LIPA/BMPR1A/ALDH1A2/PTK7/ASXL1/SPRY1/FLT4/TNS3/MAN1A2/SEC24B/JMJD6/DHCR7/GLI…	123
GO:0048608	reproductive structure development	biological process	277/9065	429/17381	9.6482e-08	3.22449e-06	2.32097e-06	1.23803	HES1/GATA6/CDX2/CEBPA/GATA4/CCND1/CCNF/FOXO3/PLAG1/ESR1/ANXA1/BCL2/WT1/H3F3B/MSH2/SOD1/BCL2L2/GRB2/RARG/EGFR/ARID1A/CYR61/BRCA2/GJA1/AXL/SERPINB5/ATM/MAP2K1/MED1/VEGFA/PTK2/CDKN1C/LIF/JUNB/ZFPM2/WNT9B/CDKN1B/HOXA10/IGF2/BMP7/HIF1A/PPARG/NRIP1/SMAD4/SOX9/PDGFRA/SP3/PTCH1/SIRT1/BCL2L11/TFAP2C/MAPK1/MERTK/PTGS2/FGF9/NOTCH1/SDC1/BMPR2/AKT1/FOXF2/TGFBR1/CEBPB/NIPBL/BAX/BASP1/FANCA/PRDX3/KRT19/PHLDA2/L…	277
GO:0032200	telomere organization	biological process	121/9065	168/17381	1.00068e-07	3.33111e-06	2.39771e-06	1.38097	H3F3B/PRIM1/RAD51C/CCNE1/CCNE2/POLA2/BRCA2/HIST1H3B/ATM/RAD51/HNRNPD/HNRNPU/MAPK3/MAPK1/RFC5/POLA1/EXO1/RFC4/HSP90AB1/TERT/ZNF365/RECQL4/POLD1/POLE/PCNA/POLE2/BLM/FEN1/DCLRE1B/CCT3/RPA2/TNKS1BP1/MRE11/RFC2/HIST3H3/HNRNPA1/SRC/MYC/HSP90AA1/HIST1H3D/TNKS/SLX4/HNRNPC/PTGES3/POLD3/CTNNB1/WRAP53/CCT5/NOP10/ATRX/SMG5/CTC1/HIST2H4B/RIF1/CCT7/HIST1H4E/ZBTB48/SMG1/NABP2/XRCC1/PARP1/XRCC6/EXOSC10/CCT4/CCT2…	121
GO:0030177	positive regulation of Wnt signaling pathway	biological process	116/9065	160/17381	1.01513e-07	3.3659e-06	2.42276e-06	1.3901	WNT3A/TLR2/ZEB2/PPM1A/COL1A1/NFKB1/DVL2/XIAP/ILK/FGF9/LRRK2/CSNK2A1/DDX3X/TERT/ASPM/SULF2/SOX4/HHEX/PSMD9/WNT5A/FGFR2/WLS/JUP/DKK1/TRPM4/CTDNEP1/PSME1/UBR5/SRC/LGR4/CAV1/AXIN1/UBA52/PSMD3/UBB/CCAR2/BAMBI/PSMB2/TNKS/SKI/SALL1/DVL1/PSMD4/PSMD11/SMARCA4/PSMC1/ATP6V0C/SPIN1/PSMB3/PSMA7/PSMC5/NRARP/PSMD2/UBC/PSMD6/PSMC4/PSMD1/PSME3/PSMD7/VPS35/ABL1/PSMA2/PSMD8/PSMD13/PSMC3/SFRP1/WNT10B/DKK2/WNT1/AXIN2…	116
GO:0002262	myeloid cell homeostasis	biological process	99/9065	133/17381	1.02345e-07	3.3759e-06	2.42995e-06	1.42722	FOXO3/ANXA1/BAP1/CDK6/HOXA5/SOD1/MAFB/SFXN1/AXL/ADAR/G6PD/SOX6/MED1/VEGFA/ETS1/HMOX1/HIF1A/SPI1/SRF/SP3/BCL2L11/RB1/MERTK/IFNG/STAT3/SMAD5/RBFOX2/BAX/HMGB1/SENP1/TGFBR3/MTHFD1/IL6/ACVR2A/KIT/STAT1/ISG15/DMTN/TMOD3/GATA3/DNASE2/SETD1A/HIPK2/GPI/RPS6/RPS14/MAEA/NFE2L1/STAT5B/HSPA9/PTBP3/ATPIF1/PRMT1/ITPKB/CEBPG/ACVR1B/INHBA/PIK3CD/RPS17/CASP3/JMJD6/TAL1/BCL6/ZFP36L1/KLF13/B2M/RPS24/THRA/ZFPM1/NCSTN…	99
GO:0001649	osteoblast differentiation	biological process	145/9065	207/17381	1.02616e-07	3.3759e-06	2.42995e-06	1.34309	MEF2C/ACVR1/WNT3A/CEBPA/HDAC4/H3F3B/CDK6/PDLIM7/MRC2/CYR61/HAND2/IGF1/TMSB4X/SH3PXD2B/SUFU/TPM4/DDX5/ADAR/PTK2/CLIC1/COL1A1/JUNB/HNRNPU/RRBP1/SOX2/JAG1/NF1/BMP7/PTCH1/ACVR2B/IGFBP5/ILK/FGF9/NOTCH1/IFITM1/BMPR2/SMAD5/AKT1/SNAI2/RUNX2/CEBPB/LEF1/EPHA2/NPPC/ATP5B/DDX21/WWTR1/IL6/ASF1A/CBFB/RASSF2/ACVR2A/TMEM64/BGLAP/SPP1/FGFR2/TRPM4/BCAP29/CLTC/GLI2/SEMA4D/LGR4/CCDC47/GNAS/SATB2/SKI/HNRNPC/PRKACA/CT…	145
GO:0035966	response to topologically incorrect protein	biological process	137/9065	194/17381	1.05573e-07	3.45966e-06	2.49024e-06	1.35402	CCND1/ATF6/HSPA1A/THBS1/DNAJB1/SERP1/EP300/HSP90B1/HSPD1/HSPA4/AGR2/ATF6B/CXCL8/TSPYL2/BCL2L11/IFNG/CREBRF/BAX/HYOU1/HSP90AB1/SEC31A/CTDSP2/PARP16/SEC61A1/TMEM33/PPP1R15B/SHC1/SEC61B/CALR/UGGT2/ACADVL/SEC62/MFN2/PTPN1/UGGT1/CCL2/SSR1/DNAJB4/PDIA6/HSP90AA1/TLN1/BAG6/KLHL15/RACK1/DDX11/GSK3A/XBP1/HSPA8/DZIP3/SRPRA/MBTPS1/DNAJA1/FAF2/HSPH1/HSPA1L/HDGF/CXXC1/DERL2/VAPB/ATF3/BOK/ATF4/TMBIM6/ANKZF1/SEC…	137
GO:0022612	gland morphogenesis	biological process	90/9065	119/17381	1.09738e-07	3.57567e-06	2.57374e-06	1.45012	WNT3A/CDC42/PLAG1/ESR1/BCL2/RARG/NRP1/EGFR/SERPINB5/FGFR1/MED1/FBXW7/HPN/CSF1/DDR1/BMP7/FGF7/SOX9/PTCH1/MSN/SCRIB/IGFBP5/TGFBR2/IFNG/NOTCH1/PAX6/SNAI2/CEBPB/BAX/EPHA2/SULF2/BTRC/IL6/NFIB/WNT5A/FRS2/PGR/FGFR2/CAPN1/B4GALT1/GLI2/ARG1/SRC/CAV1/TGFB1/TBX2/XBP1/PLXND1/RPS6KA1/PHB2/ID4/FEM1B/PLXNA1/GDF7/HOXD13/SFRP1/NTN4/GLI1/AR/RXRA/TNF/NOG/GLI3/STAT6/CUL3/TNFAIP3/CCL11/NTN1/KDM5B/LIMS2/HOXB13/LAMA5/E…	90
GO:0006469	negative regulation of protein kinase activity	biological process	174/9065	255/17381	1.09962e-07	3.57567e-06	2.57374e-06	1.30833	SPRED1/CEBPA/CDKN1A/PDCD4/RGS3/SNX6/CORO1C/PREX1/ADAR/MAPK7/PRKAR2A/CDKN1C/IGF1R/CDKN1B/NF1/BMP7/FABP4/SIRT1/CDKN2A/RB1/ERRFI1/ILK/TP73/TRIB2/AKT1/GADD45A/WWTR1/NF2/HMGCR/IL6/SMCR8/HHEX/ADARB1/DUSP8/SOCS4/TSG101/SH3BP5/NUP62/SPRED2/PPP1R1C/GSTP1/SPRY2/RGN/PTPN22/MYOCD/HIPK3/PTPN1/SFN/THY1/CAV1/DUSP7/PDPK1/RACK1/QARS/DVL1/TSC2/DUSP18/PLK1/DUSP3/NPM1/TRIM27/WARS/PARK7/TAOK3/DNAJA1/UCHL1/PAK2/PTEN/F…	174
GO:0031396	regulation of protein ubiquitination	biological process	180/9065	265/17381	1.10528e-07	3.58025e-06	2.57704e-06	1.30237	BMI1/CDK9/TRAF6/CDC14B/HSPA1A/BRCA1/SUFU/PRKCE/FBXW7/ANAPC16/PTK2/N4BP1/OTUB1/XIAP/LRRK2/TGFBR1/AIMP2/UBE2C/FANCI/HSP90AB1/CDC20/BUB1B/CDK1/FBXO5/BTRC/SOX4/SPOPL/UBXN2A/PSMD9/ARRDC3/SPRTN/RNF111/ISG15/NMI/BAG5/MAD2L1/DCUN1D1/NXN/RASSF5/CCDC22/PTPN22/PSME1/UBR5/RIPK2/CCNB1/GLMN/CAV1/AXIN1/UBA52/PSMD3/FEM1A/HSP90AA1/PEF1/UBB/NDFIP2/PSMB2/MTOR/ANAPC1/HSPA1B/UBE2N/PSMD4/FZR1/PSMD11/U2AF2/SKP1/PSMC1/G…	180
GO:0007052	mitotic spindle organization	biological process	79/9065	102/17381	1.11299e-07	3.59143e-06	2.58509e-06	1.48503	STMN1/PLK2/CDC14A/KIF23/CDC14B/HSPA1A/TTK/CCSAP/KIF2A/MECP2/HNRNPU/RHOA/PCNT/RACGAP1/PSRC1/NDC80/KIF11/CDC20/WDR62/RCC1/BORA/SPC25/TACC3/SUN2/RAN/GNAI1/NUP62/RAB11A/FLNA/KIF4A/ZNF207/CLTC/CHMP2A/CCNB1/SMC3/TNKS/HSPA1B/KPNB1/SMC1A/DYNC1H1/PLK1/MAP4/TUBGCP6/STAG2/TPX2/TPR/AURKA/AURKB/PRC1/BIRC5/KIF3B/CHMP2B/CHMP4B/CHEK2/PKD1/GOLGA2/PARP3/STAG1/POC1A/CEP97/MZT1/CLASP1/EFHC1/TUBGCP4/KIFC1/MAP10/VPS4B…	79
GO:0007173	epidermal growth factor receptor signaling pathway	biological process	97/9065	130/17381	1.12504e-07	3.6027e-06	2.5932e-06	1.43066	PTPN12/KRAS/CDC42/GRB2/SNX6/EGFR/FBXW7/APP/CSK/PTK2/AGR2/RPS6KA5/HGS/HRAS/SOX9/ERRFI1/AKT1/SOCS4/TSG101/ERBIN/RASSF2/SHC1/NUP62/SPRY2/BTC/ITGA1/CDH13/SRC/UBA52/UBB/STAM2/EPN1/PDPK1/TGFB1/FER/PTPN11/GAB1/CNOT9/RNF115/IQGAP1/UBC/SPRY1/RAB7A/NEURL1/ABL1/GAREM1/PIK3C2A/CBL/PIK3CA/PTPRJ/DAB2IP/GPRC5A/SOCS5/CAMLG/PIK3R1/STAM/EREG/MMP9/HIP1R/TGFA/HIP1/PLCG1/EPS15L1/FAM83B/EGF/RPS27A/RNF126/NRAS/EPGN/ADA…	97
GO:0030968	endoplasmic reticulum unfolded protein response	biological process	97/9065	130/17381	1.12504e-07	3.6027e-06	2.5932e-06	1.43066	CCND1/ATF6/HSPA1A/SERP1/EP300/HSP90B1/AGR2/ATF6B/CXCL8/TSPYL2/BCL2L11/IFNG/CREBRF/BAX/HYOU1/SEC31A/CTDSP2/PARP16/SEC61A1/TMEM33/PPP1R15B/SHC1/SEC61B/CALR/UGGT2/ACADVL/SEC62/PTPN1/UGGT1/CCL2/SSR1/PDIA6/TLN1/RACK1/DDX11/GSK3A/XBP1/DZIP3/SRPRA/MBTPS1/HDGF/CXXC1/DERL2/VAPB/ATF3/BOK/ATF4/TMBIM6/SEC61A2/ERO1A/EXTL3/COPS5/SYVN1/VCP/PREB/SEC63/SEC61G/HSPA5/ERN1/AMFR/YOD1/EIF2S1/EDEM1/DNAJB9/DAB2IP/SRPRB/…	97
GO:0006270	DNA replication initiation	biological process	38/9065	42/17381	1.15481e-07	3.68403e-06	2.65174e-06	1.73477	PRIM1/CCNE1/CCNE2/POLA2/PURA/POLA1/ORC6/MCM3/MCM10/GINS2/POLE/TICRR/MCM5/MCM7/CDC6/CDT1/MCM8/POLE2/MCM6/MCM4/ORC5/ORC3/MCM2/LRWD1/CDC45/ORC1/CDK2/GINS4/WRNIP1/MCM9/ORC4/MCMDC2/POLE3/PRIM2/TOPBP1/POLE4/CDC34/ORC2	38
GO:0030326	embryonic limb morphogenesis	biological process	95/9065	127/17381	1.23406e-07	3.90047e-06	2.80754e-06	1.43426	CACNA1C/RARG/HAND2/HOXD10/CHST11/FGFR1/MED1/IFT52/LRP4/CREBBP/HOXA10/BMP7/SMAD4/PTCH1/HDAC1/BCL2L11/FGF9/NOTCH1/RECK/RUNX2/NIPBL/BAX/LEF1/MYCN/MBNL1/WNT5A/DKK1/HDAC2/GLI2/RDH10/GNAS/HOXC11/PBX2/SKI/SALL1/CTNNB1/FBN2/TBX2/BMPR1A/LNPK/ALDH1A2/MEGF8/DYNC2H1/PITX1/HOXD13/RARB/FZD6/CHD7/NOG/GLI3/OSR1/HOXD9/GREM1/SP8/ECE1/IHH/DLX6/INTU/WNT3/TWIST1/TFAP2A/FLVCR1/EN1/SHOX2/MAP3K20/HOXA11/TRAF3IP1/ALX1/WN…	95
GO:0035113	embryonic appendage morphogenesis	biological process	95/9065	127/17381	1.23406e-07	3.90047e-06	2.80754e-06	1.43426	CACNA1C/RARG/HAND2/HOXD10/CHST11/FGFR1/MED1/IFT52/LRP4/CREBBP/HOXA10/BMP7/SMAD4/PTCH1/HDAC1/BCL2L11/FGF9/NOTCH1/RECK/RUNX2/NIPBL/BAX/LEF1/MYCN/MBNL1/WNT5A/DKK1/HDAC2/GLI2/RDH10/GNAS/HOXC11/PBX2/SKI/SALL1/CTNNB1/FBN2/TBX2/BMPR1A/LNPK/ALDH1A2/MEGF8/DYNC2H1/PITX1/HOXD13/RARB/FZD6/CHD7/NOG/GLI3/OSR1/HOXD9/GREM1/SP8/ECE1/IHH/DLX6/INTU/WNT3/TWIST1/TFAP2A/FLVCR1/EN1/SHOX2/MAP3K20/HOXA11/TRAF3IP1/ALX1/WN…	95
GO:0051099	positive regulation of binding	biological process	122/9065	170/17381	1.23655e-07	3.90047e-06	2.80754e-06	1.376	MEF2C/STMN1/MET/HES1/WNT3A/PLK2/CDK9/TRAF6/LRP1/NRP1/ANXA2/HAND2/IGF1/BDNF/KLF4/EP300/HMGA2/APP/CALM3/CALM2/PPARG/GMNN/RB1/IFNG/MAPRE1/LRRK2/HMGB1/HSP90AB1/TERT/NMD3/CDCA5/CDT1/EPHA4/MAPRE3/RAN/WNT5A/USP33/RALB/KAT2A/EIF4G1/RAPGEF2/EDF1/MYOCD/CTBP2/GATA3/RIPK2/WAPL/CAV1/EIF3C/EPB41/HIPK2/BAMBI/SKI/TIAM1/LARP6/TRIM28/DDX11/CTNNB1/TGFB1/EIF3D/PLXND1/PARK7/FOXC1/PARP1/TICAM1/MED25/PINX1/ABL1/ARRB1/C…	122
GO:0002064	epithelial cell development	biological process	138/9065	196/17381	1.26852e-07	3.98639e-06	2.86938e-06	1.34999	MET/CDC42/CDKN1A/ESR1/CDK6/ROCK1/HOXA5/SOD1/RARG/NOTCH4/FGFR1/IKBKB/TJP1/CLOCK/JAG1/HIF1A/SOX9/MSN/SCRIB/PODXL/NOTCH1/PAX6/RAP1A/SDC1/EPHA2/TYMS/TJP2/CLIC4/ARID4B/RAP2C/HEG1/BCL11B/WNT5A/FRS2/PGR/RAP1B/FNDC3A/F2RL1/ADAMTSL4/GPAT4/FLNB/B4GALT1/RAPGEF2/F11R/SFN/PLOD3/RHEB/PDPK1/GSK3A/CTNNB1/XBP1/ATRX/GSTM3/GPX1/TIGAR/RAPGEF1/DACT2/IQGAP1/RDX/SMO/RFX3/FOSL2/SEC24B/FEM1B/EZR/E2F4/NKX6-1/PALLD/KLF5/GS…	138
GO:1901216	positive regulation of neuron death	biological process	63/9065	78/17381	1.33897e-07	4.17738e-06	3.00685e-06	1.54865	MYB/CDC42/FOXO3/HDAC4/JUN/MCL1/PICALM/CASP9/PITX3/ATM/FBXW7/NF1/TP53/MAP3K11/BCL2L11/TLR4/FOS/BAX/AIMP2/PRNP/ELK1/DKK1/ITGA1/EPHA7/MTOR/GSK3A/CTNNB1/PPP1R13B/CASP2/PARP1/EFNB2/ATF4/ABL1/GRIK5/CASP3/ATF2/GSK3B/DDIT4/EIF2S1/CDK5R1/FYN/PIN1/CCL3/EGR1/MAPT/NQO2/PCSK9/TFAP2A/TFAP2B/DDIT3/MAP3K5/MAP2K4/ZNF746/ASCL1/FASLG/TGFB2/SRPK2/PAK3/TLR6/CASP8/CLU/MYBL2/CDC34	63
GO:0006479	protein methylation	biological process	125/9065	175/17381	1.34418e-07	4.17738e-06	3.00685e-06	1.36955	DNMT1/MYB/DNMT3B/PWP1/EHMT2/EHMT1/ASH2L/BRCA1/EZH2/MECP2/PRMT5/SMAD4/SIRT1/PRDM16/KMT5A/RBBP5/NSD2/COPRS/HIST1H1D/PHF19/VCPKMT/SETD1B/ICMT/KMT5B/ARID4B/KMT2D/SMYD2/EZH1/JARID2/RAB6A/HIST1H1B/PAXBP1/DPY30/SMARCB1/GATA3/CALM1/WDR82/RPS2/KMT2A/SETD1A/CHD5/HIST1H1E/CTNNB1/NELFE/EEF1A1/HSPA8/SMYD1/ATRX/EEF2/FBXO11/RIF1/ASH1L/BCOR/KDM3A/PCMTD1/SNRPD3/IWS1/SNRPB/CHTOP/CXXC1/HIST1H1C/SETDB1/SUV39H1/PRMT1…	125
GO:0008213	protein alkylation	biological process	125/9065	175/17381	1.34418e-07	4.17738e-06	3.00685e-06	1.36955	DNMT1/MYB/DNMT3B/PWP1/EHMT2/EHMT1/ASH2L/BRCA1/EZH2/MECP2/PRMT5/SMAD4/SIRT1/PRDM16/KMT5A/RBBP5/NSD2/COPRS/HIST1H1D/PHF19/VCPKMT/SETD1B/ICMT/KMT5B/ARID4B/KMT2D/SMYD2/EZH1/JARID2/RAB6A/HIST1H1B/PAXBP1/DPY30/SMARCB1/GATA3/CALM1/WDR82/RPS2/KMT2A/SETD1A/CHD5/HIST1H1E/CTNNB1/NELFE/EEF1A1/HSPA8/SMYD1/ATRX/EEF2/FBXO11/RIF1/ASH1L/BCOR/KDM3A/PCMTD1/SNRPD3/IWS1/SNRPB/CHTOP/CXXC1/HIST1H1C/SETDB1/SUV39H1/PRMT1…	125
GO:0019216	regulation of lipid metabolic process	biological process	236/9065	360/17381	1.38586e-07	4.29106e-06	3.08868e-06	1.25695	CDC42/AKT2/ANXA1/SLC45A3/CREBL2/SOD1/F2/CYR61/BRCA1/KLF4/MED1/PRKCE/HNF4A/FBXW7/PIK3R2/FGF2/PTK2/IRS1/NFKB1/CPT1A/PPP2R5A/CREBBP/PPARA/NCOR2/NFYB/CCKBR/PPARG/PDGFRA/CREB1/SIRT1/FLT1/RB1/PTGS2/PIK3CG/TEK/IFNG/CTGF/FLT3/LDLR/AKT1/FABP3/SNAI2/CDK4/ATP1A1/ERFE/VAV3/TNFRSF21/IDI1/C1QTNF2/TM7SF2/LPCAT1/HMGCR/LPGAT1/PRKAA1/MID1IP1/STK11/PDE3B/PSAP/VAC14/RAN/HMGCS1/BCL11B/SF1/TXNRD1/KIT/NFYA/SIN3A/ACADVL…	236
GO:0016482	cytosolic transport	biological process	105/9065	143/17381	1.3985e-07	4.31434e-06	3.10544e-06	1.40786	RAB9B/RAB21/SNX6/GAK/MAP2K1/SNX1/CES1/MON2/MAPK3/MAPK1/MSN/RAB5A/LRRK2/FAM109B/GBF1/RAB14/SNX12/ANKFY1/SYBU/ARL1/KLHL20/TRAPPC10/AP1G1/RAB6A/VPS53/HOOK1/TMEM87A/AP1S1/CLTC/SRC/RAB29/ERC1/FAM160A2/PIKFYVE/UBE2O/STX16/TBC1D10B/TRIM27/PLEKHJ1/WASHC2C/GCC2/GOSR1/SPAG9/MYO1D/ANKRD27/AP2A1/RAB7A/RDX/VPS11/WASH3P/VPS35/EZR/TGOLN2/VPS13C/HOOK3/EVI5/VPS51/RGP1/PTPN23/SNF8/ZFYVE21/WDR81/ACTR2/VAMP3/SNX16/B…	105
GO:0035567	non-canonical Wnt signaling pathway	biological process	110/9065	151/17381	1.427e-07	4.37026e-06	3.14568e-06	1.39676	NLK/CDC42/MOV10/WNT9B/DVL2/RNF213/GPC4/PFN1/RHOA/LEF1/PSMD9/AGO1/WNT5A/AP2S1/DKK1/PLCB3/CLTC/GNB1/PSME1/GNAT2/CALM1/TNRC6A/UBA52/PSMD3/UBB/AP2B1/TNRC6B/PSMB2/AP2A2/FRZB/TIAM1/DVL1/PSMD4/CTNNB1/PSMD11/PPP3R1/PSMC1/PSMB3/PSMA7/PSMC5/PTK7/SMURF1/AP2A1/PSMD2/UBC/PSMD6/PSMC4/PSMD1/PSME3/PSMD7/ABL1/VANGL1/PSMA2/PSMD8/AGO2/PSMD13/PPP3CB/PSMC3/MED12/SFRP1/WNT1/MAP3K7/RAC1/FZD4/VANGL2/TNRC6C/ZNRF3/FZD6/CS…	110
GO:0043488	regulation of mRNA stability	biological process	110/9065	151/17381	1.427e-07	4.37026e-06	3.14568e-06	1.39676	E2F1/HSPA1A/RNASEL/SET/HNRNPD/HNRNPU/YWHAZ/AKT1/ZFP36L2/XPO1/PSMD9/TARDBP/PDE12/EIF4G1/ANP32A/YTHDF2/PSME1/IGF2BP3/CPEB3/IGF2BP1/YBX1/UBA52/PSMD3/UBB/PAIP1/PSMB2/LARP1/MTOR/HNRNPC/SAMD4B/MEX3D/PSMD4/PSMD11/PABPC1/GIGYF2/HSPA8/PSMC1/HNRNPR/IGF2BP2/SERBP1/PSMB3/PSMA7/NUP214/YBX3/PSMC5/PRKCA/MAPKAPK2/PSMD2/UBC/HNRNPA0/PUM1/PSMD6/QKI/PSMC4/PSMD1/PSME3/PSMD7/EXOSC1/YWHAB/PSMA2/KHSRP/PSMD8/CNOT6L/PSMD1…	110
GO:0008286	insulin receptor signaling pathway	biological process	91/9065	121/17381	1.47428e-07	4.49868e-06	3.23813e-06	1.44199	AKT2/CCND3/FOXO1/GRB2/ATP6V0A1/ATP6V1B2/PIK3R2/IRS1/IGF1R/IGF2/SIRT1/AKT1/CDK4/NDEL1/ATP6V1C1/GRB10/SHC1/ATP6V1A/SMARCC1/ATP6V1E1/PTPN1/SRC/PHIP/EIF4EBP2/SREBF1/IRS4/TSC2/GSK3A/ATP6AP1/BAIAP2/FER/ATP6V0C/SOGA1/GAB1/NUCKS1/TSC1/ZNF106/APPL1/PIK3R3/SERPINA12/APC/C2CD5/PIK3C2A/ADIPOR1/KL/CISH/PIK3CA/RPS6KB1/ATP6V1G1/OGT/PRKCD/RHOQ/SOCS7/PIK3R1/ATP6V0B/EIF4EBP1/ATP6V1F/FOXO4/OSBPL8/INS/SESN3/ATP6V0A2…	91
GO:0048285	organelle fission	biological process	282/9065	439/17381	1.48816e-07	4.52466e-06	3.25683e-06	1.23166	CDC42/CDC14A/CHEK1/KIF23/ANLN/CDC14B/HSPA1A/MSH2/RAD51C/CCNE1/CCNE2/TTK/IGF1/BRCA2/ATM/CCSAP/RAD51/KIF2A/CDKN1C/LIF/PRMT5/CDKN1B/HNRNPU/EDN1/KIF22/IGF2/BMP7/KDR/RB1/CDK13/DNM2/LRRK2/RHOA/NSL1/NDC1/NIPBL/SGO1/HASPIN/FANCA/UBE2C/KNTC1/MTFR2/RACGAP1/PSRC1/PKMYT1/TRIP13/NDC80/DSN1/NCAPG/PEX11B/KIF11/CDC20/BUB1B/PSMC3IP/NCAPH/MND1/DSCC1/TOP2A/FANCM/MSH6/ASPM/CDCA5/NCAPD2/CDC6/FBXO5/MYBL1/RCC1/BORA/CDT…	282
GO:0060485	mesenchyme development	biological process	168/9065	246/17381	1.65873e-07	5.02512e-06	3.61705e-06	1.30943	MEF2C/HES1/ACVR1/WNT3A/GATA4/ZEB2/PDCD4/BCL2/WT1/HOXA5/NRP1/CORO1C/HAND2/DDX5/FGFR1/ERBB3/HMGA2/EZH2/HPN/COL1A1/ZFPM2/EDN1/JAG1/ERBB4/BMP7/HIF1A/SMAD4/SOX9/MAPK3/MAPK1/FGF9/TGFBR2/NOTCH1/BMPR2/SNAI2/MDM2/PDPN/SMAD2/FOXF2/EDNRA/TGFBR1/BASP1/LEF1/TGFBR3/SIX1/WWTR1/RFLNB/ERG/SIX4/WNT5A/STAT1/FGFR2/ACTA1/HDAC2/PHLDB2/ACTC1/FOLR1/RDH10/HAND1/HNRNPAB/BCL9L/MYC/ZNF703/PEF1/BAMBI/FRZB/TCOF1/MTOR/TIAM1/TB…	168
GO:0000280	nuclear division	biological process	255/9065	393/17381	1.67042e-07	5.04239e-06	3.62948e-06	1.2441	CDC42/CDC14A/CHEK1/KIF23/ANLN/CDC14B/HSPA1A/MSH2/RAD51C/CCNE1/CCNE2/TTK/IGF1/BRCA2/ATM/CCSAP/RAD51/KIF2A/CDKN1C/LIF/PRMT5/CDKN1B/HNRNPU/EDN1/KIF22/IGF2/BMP7/RB1/CDK13/RHOA/NSL1/NDC1/NIPBL/SGO1/HASPIN/FANCA/UBE2C/KNTC1/RACGAP1/PSRC1/PKMYT1/TRIP13/NDC80/DSN1/NCAPG/KIF11/CDC20/BUB1B/PSMC3IP/NCAPH/MND1/DSCC1/TOP2A/FANCM/MSH6/ASPM/CDCA5/NCAPD2/CDC6/FBXO5/MYBL1/RCC1/BORA/CDT1/TACC3/ZWINT/FANCD2/ESPL1/S…	255
GO:0034620	cellular response to unfolded protein	biological process	101/9065	137/17381	1.7258e-07	5.19097e-06	3.73643e-06	1.41354	CCND1/ATF6/HSPA1A/SERP1/EP300/HSP90B1/AGR2/ATF6B/CXCL8/TSPYL2/BCL2L11/IFNG/CREBRF/BAX/HYOU1/SEC31A/CTDSP2/PARP16/SEC61A1/TMEM33/PPP1R15B/SHC1/SEC61B/CALR/UGGT2/ACADVL/SEC62/PTPN1/UGGT1/CCL2/SSR1/PDIA6/TLN1/RACK1/DDX11/GSK3A/XBP1/DZIP3/SRPRA/MBTPS1/HDGF/CXXC1/DERL2/VAPB/ATF3/BOK/ATF4/TMBIM6/SEC61A2/ERO1A/EXTL3/COPS5/SYVN1/VCP/PREB/SEC63/SEC61G/HSPA5/ERN1/AMFR/YOD1/EIF2S1/EDEM1/DNAJB9/DAB2IP/SRPRB/…	101
GO:1904888	cranial skeletal system development	biological process	54/9065	65/17381	1.7673e-07	5.29688e-06	3.81266e-06	1.5929	MEF2C/SH3PXD2B/CHST11/WNT9B/PDGFRA/TGFBR2/RUNX2/SMAD2/TGFBR1/NIPBL/SIX1/MTHFD1/SIX4/FGFR2/SLC39A3/RDH10/GNAS/MTHFD1L/TBX1/CTNNB1/TGFB1/FOXN3/INSIG1/NDST1/SMAD3/MEGF8/DLX2/EIF4A3/MED12/SETD2/NODAL/RAB23/CEP55/MMP14/GLI3/HOXA1/TWIST1/TFAP2A/PAX5/INSIG2/COLEC10/PRRX1/IFT140/FOXE1/FREM1/MSX2/TP63/TGFB2/SLC39A1/NEUROG1/MMP16/TULP3/IRX5/GRHL2	54
GO:0009991	response to extracellular stimulus	biological process	292/9065	457/17381	1.86412e-07	5.56723e-06	4.00726e-06	1.22511	UCP2/GATA4/CCND1/CDKN1A/FOXO3/DNMT3A/BCL2/JUN/OMA1/DNMT3B/SOD1/FOXO1/EHMT2/EGFR/SLC16A1/FSTL1/PKM/AXL/CHSY1/G6PD/MED1/VCAM1/KLF10/COL1A1/PIM1/P2RX7/WNT9B/HMOX1/PPARA/FAS/TP53/ACVR1C/BMP7/PPARG/SRF/MAPK3/SIRT1/MAPK1/IGFBP2/PTGS2/SLC8A1/TGFBR2/MGMT/FOS/PMAIP1/LDLR/BMPR2/AKT1/LRRK2/SNAI2/MDM2/MMP7/MAPK8/SESN2/MAX/TYMS/KANK2/HMGCR/IL6/PRKAA1/SRSF2/HMGCS1/GLUL/FNIP1/BGLAP/SPP1/GSTP1/ACTA1/STK24/USP33/…	292
GO:0043406	positive regulation of MAP kinase activity	biological process	178/9065	263/17381	1.90956e-07	5.67226e-06	4.08286e-06	1.29769	CXCR4/NTRK3/IRAK2/KRAS/TRAF6/IRAK1/ZEB2/PAK1/SOD1/MAP3K8/THBS1/HACD3/IQGAP3/EGFR/IGF1/CRK/MAP2K1/FGFR1/VEGFA/EZH2/CSK/FGF2/P2RX7/PEA15/DVL2/EDN1/CD40LG/HRAS/ERBB2/MAP3K11/CRKL/MAPK3/MAPK1/FLT1/TLR4/ILK/PIK3CG/TP73/RAP1A/FLT3/NTF3/LRRK2/ADAM9/LPAR1/TGFBR1/GADD45A/CDK1/C1QTNF2/C5/EPHA4/PRKAA1/SHC1/WNT5A/MAP3K21/FRS2/KIT/STK24/DKK1/GNAI2/PDCD10/ITGA1/PTPN1/RIPK2/MAP4K2/SRC/AXIN1/UBA52/UBB/DUSP7/MINK…	178
GO:0061351	neural precursor cell proliferation	biological process	99/9065	134/17381	1.91276e-07	5.67226e-06	4.08286e-06	1.41657	WNT3A/FOXO3/ZEB2/FOXO1/PTBP2/PITX3/RERE/FGFR1/VEGFA/PSMG1/NF1/HIF1A/ARTN/ILK/NOTCH1/PAX6/LRRK2/RACGAP1/LEF1/MELK/SHCBP1/ASPM/DAGLB/NF2/HHEX/WNT5A/FRS2/SOX5/FGFR2/GNG5/ORC3/FLNA/KDM2B/DBN1/PLXNB2/CDH2/RAB10/CEP120/IGF2BP1/SETD1A/NDE1/ARHGEF2/KCTD11/CTNNB1/TGFB1/CTNNA1/RAPGEF1/ID4/SMO/ZNF503/HOOK3/LRP2/KIF1A/PTPRZ1/WNT1/NUMB/BTG2/PAFAH1B1/FZD6/RORA/TRIM71/FOXG1/ID2/SMARCD3/WNT2/GLI3/LYN/EMX1/DISC1/…	99
GO:0000070	mitotic sister chromatid segregation	biological process	104/9065	142/17381	1.98676e-07	5.86976e-06	4.22502e-06	1.40427	CDC14A/KIF23/CDC14B/TTK/ATM/HNRNPU/KIF22/RB1/NSL1/NIPBL/SGO1/HASPIN/UBE2C/RACGAP1/PSRC1/TRIP13/NDC80/DSN1/NCAPG/CDC20/BUB1B/NCAPH/DSCC1/CDCA5/NCAPD2/CDC6/CDT1/TACC3/ZWINT/ESPL1/POGZ/NUP62/RAB11A/CHAMP1/DYNC1LI1/MAD2L1/NCAPD3/CENPF/KIF4A/SMC4/ZNF207/CHMP2A/KIF2C/CCNB1/WAPL/TNKS/KPNB1/SMC1A/VPS4A/ATRX/PDS5A/PLK1/CEP57/IK/PHF23/AKAP8/KLHL22/PINX1/AKAP8L/TPR/PTTG1/APC/NAA10/BUB1/AURKB/KIF18B/PRC1/DUS…	104
GO:1902115	regulation of organelle assembly	biological process	114/9065	158/17381	1.99329e-07	5.86976e-06	4.22502e-06	1.38342	MEF2C/PLK2/CENPJ/HSPA1A/PDCD6IP/BRCA1/SDC4/FSCN1/CCSAP/CNOT6/CYLD/HNRNPU/EDN1/SMAD4/MSN/SDC1/RAB5A/DNM2/LRRK2/SYNE2/CCP110/PIP4K2C/SMCR8/RAB1B/ATMIN/TSG101/SEPT7/PIP4K2B/NUP62/TCTEX1D2/RALB/LCP1/CHMP2A/CEP295/SRC/PAN3/CEP120/SMC3/ATXN2L/PIKFYVE/ARHGEF2/HSPA1B/CNOT1/TRAPPC12/SMC1A/DYNC1H1/PLK1/NPM1/HTT/MAP4/PHF23/RBM14/UBQLN2/STAG2/AKAP13/PIP4K2A/CDK5RAP2/RDX/VPS11/TPR/TRIM37/TAPT1/SCFD1/EZR/SEPT9…	114
GO:1901655	cellular response to ketone	biological process	68/9065	86/17381	2.04493e-07	6.00084e-06	4.31937e-06	1.51606	FOXO3/DNMT3B/FOXO1/EGFR/CASP9/ADCY6/KLF4/PRKCE/HNRNPU/PPARG/SIRT1/MSN/ERRFI1/KLF9/AKT1/CFTR/GJB2/IL6/NR3C1/PRKAA1/ELK1/GNAI1/SPP1/EIF4E/GNB1/CCL2/ARG1/SRC/LARP1/TGFB1/FDX1/AKR1B1/CDC5L/AKAP8/ACACA/DCPS/ADCY1/RPL32/PRKAA2/SFRP1/AR/ICAM1/ROCK2/DDIT4/RPS6KB1/ATP2B1/PTGER4/EIF4EBP1/NDOR1/KLF2/XRN1/FBXO32/SRD5A1/AACS/PTGDR/EFNA5/TFAP4/ADCY2/TNFSF4/RWDD1/IFNB1/USP8/GNG2/P2RY6/ADCY5/HDAC8/STAR/FECH	68
GO:0072659	protein localization to plasma membrane	biological process	155/9065	225/17381	2.10005e-07	6.14117e-06	4.42038e-06	1.32086	WNT3A/AKT2/GOLPH3L/ROCK1/LRP1/PICALM/GOLGA7/GAK/EGFR/ANXA2/RAB11FIP2/PRKCE/IKBKB/CSK/AGR2/EHD2/PPP2R5A/PTCH1/EPB41L3/SCRIB/IFNG/AKT1/CSNK2A1/NSG1/EPHA2/PRNP/CDH1/VAMP8/TMED2/GOPC/RAB34/MAP7/SLMAP/MPP5/RAB11A/RAB31/GOLPH3/JUP/KIF5B/FLOT2/SYTL2/PLS1/FLNA/EFR3A/RAPGEF2/PRKG2/PACS2/CLTC/ITGA3/F11R/VAMP7/CDH2/RAB10/ITGB1/ATP1B3/PDPK1/RACK1/PKP2/TGFB1/PIP5K1A/VPS4A/RAB26/FCHO2/STX7/ZFYVE27/TMBIM1/SPTBN…	155
GO:0050678	regulation of epithelial cell proliferation	biological process	204/9065	307/17381	2.16455e-07	6.30791e-06	4.54039e-06	1.27409	MEF2C/HES1/WNT3A/CDC42/CCND1/RIDA/JUN/CDK6/HOXA5/THBS1/NRP1/IQGAP3/EGFR/IGF1/BRCA2/GJA1/SERPINB5/MED1/RUNX3/VEGFA/IFT52/FBXW7/FGF2/HMGN1/PRKD2/HPN/CDKN1C/CDKN1B/SOX2/NF1/HRAS/ERBB2/HIF1A/FGF7/SOX9/PTCH1/MTSS1/SIRT1/KDR/RB1/ERRFI1/EGFL7/FGF9/TEK/KLF9/IFNG/NOTCH1/PAX6/STAT3/LAMC1/PTPRK/BMPR2/AKT1/SNAI2/TGFBR1/CXCL12/BAX/EPPK1/ATOH8/TGFBR3/SIX1/SULF2/NRP2/IL6/SIX4/NFIB/STK11/F3/BCL11B/GLUL/SRSF6/WNT…	204
GO:0010976	positive regulation of neuron projection development	biological process	167/9065	245/17381	2.19386e-07	6.37127e-06	4.586e-06	1.30695	NTRK3/WNT3A/ZEB2/RAB21/PAK1/NRP1/SHTN1/BDNF/MAP2K1/FGFR1/VEGFA/EZH2/CPNE6/FN1/DPYSL3/ARHGDIA/TWF2/BMP7/SRF/NTRK2/ILK/RAP1A/BMPR2/LPAR1/RHOA/CXCL12/PLXNC1/ITPKA/IL6/EPHA4/NDEL1/LRP8/STK11/VLDLR/PPP1R9A/PTPRD/RAB11A/WNT5A/ABL2/RIMS2/NPTN/CDH4/TUBB2B/RAPGEF2/CAPRIN1/ITGA3/IST1/SEMA4D/PLXNB2/VAMP7/L1CAM/FIG4/IL2/CPEB3/ITSN2/ARF1/MTOR/TIAM1/BRAF/DVL1/CUX1/MAP1B/BAIAP2/ROBO2/TRPC5/SYT4/ZMYND8/RASAL1/AM…	167
GO:0010810	regulation of cell-substrate adhesion	biological process	133/9065	189/17381	2.24097e-07	6.46603e-06	4.65421e-06	1.34926	CDC42/BCL2/CDK6/ROCK1/THBS1/NRP1/CORO1C/CYR61/UTRN/FBLN2/PREX1/SDC4/HOXA7/CRK/VEGFA/PRKCE/FN1/PTK2/AGR2/COL1A1/PLAU/CSF1/DDR1/NF1/CRKL/SERPINE1/CDKN2A/KDR/ILK/TEK/NOTCH1/DNM2/PDPN/RHOA/LIMS1/RAC2/NF2/DLC1/RCC2/DMTN/ITGA6/UNC13D/LGALS1/CALR/ACTN4/FLNA/PHLDB2/ITGA3/TBCD/CDH13/THY1/SRC/MINK1/BRAF/WASHC2C/TSC1/SMAD3/PTEN/IQGAP1/SLC9A1/ABL1/C1QBP/CAMSAP3/NID1/PPM1F/FBLN1/SFRP1/RREB1/ADAM15/ITGA5/WNT1/…	133
GO:0035967	cellular response to topologically incorrect protein	biological process	112/9065	155/17381	2.24184e-07	6.46603e-06	4.65421e-06	1.38546	CCND1/ATF6/HSPA1A/SERP1/EP300/HSP90B1/AGR2/ATF6B/CXCL8/TSPYL2/BCL2L11/IFNG/CREBRF/BAX/HYOU1/SEC31A/CTDSP2/PARP16/SEC61A1/TMEM33/PPP1R15B/SHC1/SEC61B/CALR/UGGT2/ACADVL/SEC62/PTPN1/UGGT1/CCL2/SSR1/PDIA6/TLN1/BAG6/KLHL15/RACK1/DDX11/GSK3A/XBP1/DZIP3/SRPRA/MBTPS1/HDGF/CXXC1/DERL2/VAPB/ATF3/BOK/ATF4/TMBIM6/ANKZF1/SEC61A2/ERO1A/EXTL3/COPS5/SYVN1/VCP/PREB/SEC63/SEC61G/HSPA5/ERN1/AMFR/YOD1/EIF2S1/EDEM1/D…	112
GO:0042254	ribosome biogenesis	biological process	215/9065	326/17381	2.48602e-07	7.12412e-06	5.1279e-06	1.26453	RNASEL/PA2G4/NSUN4/GEMIN4/SIRT1/NSUN5/DDX3X/XPO1/MRPS9/NMD3/DDX21/BMT2/WDR37/RAN/TSR1/SAMD15/NOP53/FRG1/DROSHA/RPP40/RRP36/ZNF622/NOC2L/ISG20/DIEXF/ABT1/RPUSD2/UTP20/RPS8/RPS2/PDCD11/UBA52/XRN2/RPL36A/RPL29/WDR46/RPL18A/NOP2/RPL3/RPS6/RPL4/RPLP1/RPS14/PELP1/RPL7A/RPL10/DDX17/RPL18/NOL9/RPL37/RPL13/MRPL11/UTP4/PWP2/RRP1B/RRP7A/RPS27/RPL8/RPS15A/RPS5/RPL10A/NOP10/AAMP/GTPBP4/MRPS11/RPL26L1/NPM1/RPS…	215
GO:0032984	macromolecular complex disassembly	biological process	202/9065	304/17381	2.48693e-07	7.12412e-06	5.1279e-06	1.27404	STMN1/WNT3A/SET/GAK/ARID2/ARID1A/CCSAP/KLC1/IGF1R/DVL2/TWF1/SNAPIN/TWF2/UVRAG/HMGA1/MRPL42/MRPS9/VAMP8/MRPL4/SMCR8/LIMA1/C12orf65/MID1IP1/GLE1/CAPZB/TSG101/FYCO1/CSNK1A1/CAPZA1/DMTN/MRPL19/KIF5B/F2RL1/SMARCC1/SMARCB1/CAPG/TMOD3/PLEKHH2/CHMP2A/APEH/IST1/KIF2C/CAV1/AXIN1/SH3GL1/MYC/MRPL46/PPP1CA/SMARCD1/ARHGEF2/UBQLN4/MRPS16/DVL1/MRPS2/NCKAP5L/MRPL11/CTNNB1/FRAT1/VPS4A/HSPA8/SMARCA4/MID1/MTPN/MRPS1…	202
GO:0002753	cytoplasmic pattern recognition receptor signaling pathway	biological process	51/9065	61/17381	2.60649e-07	7.4413e-06	5.3562e-06	1.60305	IRAK2/TRAF6/IRAK1/HSPA1A/IKBKB/CYLD/CHUK/TLR4/XIAP/NFKBIA/ERBIN/IRF7/NOP53/PTPN22/DDX60/ANKRD17/RIPK2/SEC14L1/LSM14A/UBA52/UBB/HSPA1B/UBE2N/IFIH1/ITCH/UBC/PUM1/NLRX1/C1QBP/MAVS/TAB2/IKBKG/MAP3K7/UBE2V1/RIOK3/DDX58/TNFAIP3/TSPAN6/RPS27A/MAP2K6/TAB1/RNF125/PUM2/RELA/C1orf106/CASP8/TAB3/NOD2/NPLOC4/GPATCH3/OTULIN	51
GO:0022618	ribonucleoprotein complex assembly	biological process	145/9065	209/17381	2.62397e-07	7.46589e-06	5.37391e-06	1.33024	GEMIN2/PTBP2/GCFC2/ADAR/ATM/CNOT6/PRMT5/SRSF9/NSUN4/DICER1/GEMIN4/SRSF1/TAF9/POLR2D/DDX3X/PSIP1/HSP90AB1/EIF4B/TICRR/USP39/AGO1/DDX6/SF1/TSR1/SRSF6/YTHDC1/SAMD15/G3BP2/SCAF11/NOP53/SRSF5/PAN3/ABT1/DDX1/EDC3/LSM14A/RBM5/HSP90AA1/ATXN2L/NOP2/RPL3/DDX23/SF3A1/PTGES3/RPS14/RPL10/CNOT1/MRPL11/PWP2/DYNC1H1/RRP7A/RPS27/RPS5/EIF3D/LIMD1/PRPF8/SNRNP200/MRPS11/DDX20/NPM1/ISY1/RPS10/LUC7L3/RPS28/EIF3A/SF3B1…	145
GO:0007389	pattern specification process	biological process	271/9065	422/17381	2.69056e-07	7.58754e-06	5.46146e-06	1.2313	MEF2C/BMI1/HES1/ACVR1/CDX2/WNT3A/GATA4/ZEB2/WT1/HOXA5/MAFB/RARG/NRP1/HAND2/HOXD10/SUFU/HOXB8/ZEB1/CHSY1/HOXA7/HOXD8/HOXC8/ATM/EGR2/FGFR1/EP300/IFT52/LRP4/HOXB7/MEOX2/ETS2/DVL2/EDN1/HOXA10/ERBB4/BMP7/HIF1A/SRF/RNF2/CRKL/SMAD4/PTCH1/ACVR2B/TRA2B/TGFBR2/NOTCH1/PAX6/BMPR2/SMAD5/SMAD2/TGFBR1/DLX1/BASP1/LEF1/SIX1/TMED2/HOXC4/HOXA3/HHEX/HOXB5/ACVR2A/WNT5A/FRS2/RNF111/FGFR2/WLS/AP1B1/DKK1/KAT2A/GLI2/PKD1…	271
GO:0043409	negative regulation of MAPK cascade	biological process	118/9065	165/17381	2.69123e-07	7.58754e-06	5.46146e-06	1.37121	SPRED1/PDCD4/RGS3/FOXO1/TIMP3/KLF4/MAPK7/PIK3R2/CSK/LIF/P2RX7/IGF1R/NF1/BMP7/SMAD4/ERRFI1/TLR4/TP73/AKT1/NF2/HMGCR/DUSP8/NUP62/SPRED2/PTPRR/GSTP1/SPRY2/F2RL1/PTPN22/HIPK3/PTPN1/CAV1/MYC/DUSP7/QARS/DUSP18/DUSP3/ASH1L/EIF3A/TAOK3/DNAJA1/HSPH1/UCHL1/PTEN/RAPGEF1/ITCH/TNIP1/SPRY1/ATF3/ABL1/PPP2CA/EZR/FOXM1/ARRB1/RNF149/SYNJ2BP/FKTN/RANBP9/FBLN1/SFRP1/DUSP1/EFNA1/APOE/DUSP5/ZMYND11/PAFAH1B1/PTPRJ/PRKC…	118
GO:0042787	protein ubiquitination involved in ubiquitin-dependent protein catabolic process	biological process	148/9065	214/17381	2.69375e-07	7.58754e-06	5.46146e-06	1.32603	HACE1/UHRF1/SUFU/ANKIB1/FBXW7/ANAPC16/PTK2/SIAH1/CUL2/BTBD3/MDM2/UBE2C/CDC20/BUB1B/DDB1/CDK1/FBXO5/BTRC/AREL1/RNF7/SPOPL/PSMD9/RNF145/RNF111/CUL4B/KLHL3/MAD2L1/CCDC22/UBA6/PSME1/FBXO45/CCNB1/AXIN1/UBA52/PSMD3/UBB/PSMB2/KLHL15/ANAPC1/PSMD4/FZR1/PSMD11/MAEA/SKP1/PSMC1/DZIP3/HUWE1/PLK1/PSMB3/PSMA7/RNF181/RNF115/PSMC5/PTEN/CUL4A/UBE2Z/TRIP12/CCIN/SMURF1/ITCH/PSMD2/UBC/PSMD6/PSMC4/PSMD1/PSME3/PSMD7/AR…	148
GO:0014020	primary neural tube formation	biological process	73/9065	94/17381	2.7785e-07	7.77425e-06	5.59586e-06	1.48902	TRAF6/ZEB2/RARG/ARID1A/SUFU/SDC4/DVL2/BMP7/HIF1A/PTCH1/SCRIB/PFN1/VASP/MTHFD1/TMED2/LUZP1/WNT5A/DLC1/KAT2A/FOLR1/KDM2B/PLXNB2/GLMN/MTHFD1L/SKI/PRKACA/DVL1/TSC2/TGFB1/TEAD2/TSC1/PTK7/SEMA4C/CFL1/ABL1/SEC24B/RALA/LRP2/MED12/SFRP1/SETD2/NODAL/VANGL2/FZD6/TRIM71/PRICKLE1/NOG/LRP6/ADM/BBS4/KDM6A/NPHP3/APAF1/TWIST1/RARA/PAX2/DVL3/ALX1/ARHGAP35/CC2D2A/PRKACB/FZD1/SPINT2/FZD2/SHROOM3/TGFB2/BCL10/LIAS/STI…	73
GO:0016925	protein sumoylation	biological process	73/9065	94/17381	2.7785e-07	7.77425e-06	5.59586e-06	1.48902	HDAC4/MITF/POM121/EGR2/PIAS1/UBE2I/SP3/MDM2/NDC1/NUP58/SENP1/TOP2A/PCNA/TOLLIP/NUP62/TRPM4/NUP50/POM121C/NUP160/NUP210/BCL11A/NFATC2IP/NUP153/L3MBTL2/TRIM28/CTNNB1/RANBP2/PARK7/NUP214/AAAS/NUP37/IFIH1/SAE1/RANGAP1/TPR/TOP1/NUPL2/SUMO2/AURKB/NUP98/NUP43/BIRC5/MTA1/UBA2/INCENP/GNL3L/TP53BP1/HDAC7/EGR1/NUP205/CDCA8/KIAA1586/MUL1/NUP155/ZNF451/SUMO1/SEH1L/CBX4/NUP54/PIAS4/NUP93/RNF222/SENP5/NUP188/RE…	73
GO:0030323	respiratory tube development	biological process	124/9065	175/17381	3.10839e-07	8.66851e-06	6.23954e-06	1.3586	HES1/GATA6/KRAS/CDC42/CEBPA/RIDA/HOXA5/EGFR/MAP2K1/FGFR1/VEGFA/EP300/AGR2/LIF/ZFPM2/FGF7/SRF/SOX9/MAPK3/PDGFRA/SP3/CREB1/ACVR2B/MAPK1/ERRFI1/IGFBP5/FGF9/TGFBR2/NOTCH1/CTGF/BMPR2/PDPN/SMAD2/AIMP2/HMGB1/MYCN/HHEX/NFIB/HEG1/SRSF6/WNT5A/PGR/SPRY2/FGFR2/EIF4E/MYOCD/GLI2/ITGA3/ARG1/STK40/RDH10/TIMELESS/PLOD3/BAG6/SREBF1/CTNNB1/LIPA/BMPR1A/ALDH1A2/PTK7/ASXL1/SPRY1/FLT4/TNS3/MAN1A2/SEC24B/JMJD6/DHCR7/GLI…	124
GO:0046822	regulation of nucleocytoplasmic transport	biological process	149/9065	216/17381	3.15149e-07	8.7597e-06	6.30518e-06	1.32263	WNT3A/TLR2/CDKN1A/PPM1A/F2/EGFR/ANP32B/IGF1/TMSB4X/SUFU/UHMK1/MED1/FAF1/MAPK7/PIK3R2/APP/RBM4/CYLD/NF1/TP53/ERBB4/BMP7/SMAD4/SIRT1/MAPK1/TLR4/NFKBIA/PTGS2/IFNG/LRRK2/SNAI2/MDM2/RHOA/TGFBR1/DNAJC27/BARD1/XPO1/NUP58/ECT2/HSP90AB1/CDK1/NLRP3/CDH1/SULF2/WWTR1/SOX4/IL6/NUP62/IFI27/MX2/JUP/G3BP2/EMD/FLNA/SRI/CCDC22/UBR5/SFN/BAMBI/NUP153/MTOR/PRKACA/TRIM28/TGFB1/BMPR1A/PTPN11/NCBP2/PARP10/YWHAE/KEAP1/XP…	149
GO:0031058	positive regulation of histone modification	biological process	65/9065	82/17381	3.19842e-07	8.86089e-06	6.37801e-06	1.51987	DNMT1/MYB/CDK9/DNMT3B/BRCA1/ATM/VEGFA/MECP2/PRKD2/LIF/RPS6KA5/TP53/SMAD4/MAPK3/BRD7/SIRT1/LRRK2/SNAI2/NIPBL/PHF19/JARID2/HIST1H1B/PAXBP1/KAT2A/SMARCB1/GATA3/CTBP1/CCNB1/KMT2A/SREBF1/WBP2/UBE2N/CTNNB1/TGFB1/NELFE/PPARGC1A/RIF1/AKAP8/CHTOP/RUVBL2/RNF40/SART3/AKAP8L/ARRB1/BCL6/FMR1/OGT/TADA2B/KAT7/MUC1/RNF20/RPS6KA4/PAX7/TADA2A/SDR16C5/PIWIL2/TET1/C6orf89/JDP2/EED/PRDM12/MTF2/IL1B/NOS1/SNW1	65
GO:0071826	ribonucleoprotein complex subunit organization	biological process	152/9065	221/17381	3.20909e-07	8.8613e-06	6.37831e-06	1.31874	GEMIN2/PTBP2/GCFC2/ADAR/ATM/CNOT6/KLC1/PRMT5/SRSF9/NSUN4/DICER1/GEMIN4/SRSF1/TAF9/POLR2D/DDX3X/PSIP1/HSP90AB1/EIF4B/TICRR/USP39/AGO1/DDX6/SF1/TSR1/SRSF6/YTHDC1/SAMD15/KIF5B/G3BP2/SCAF11/NOP53/SRSF5/PAN3/ABT1/DDX1/EDC3/LSM14A/RBM5/HSP90AA1/ATXN2L/NOP2/RPL3/DDX23/SF3A1/PTGES3/RPS14/RPL10/CNOT1/MRPL11/PWP2/DYNC1H1/RRP7A/RPS27/RPS5/EIF3D/LIMD1/PRPF8/SNRNP200/MRPS11/DDX20/NPM1/ISY1/RPS10/LUC7L3/RPS28/…	152
GO:0035270	endocrine system development	biological process	94/9065	127/17381	3.35637e-07	9.23769e-06	6.64923e-06	1.41916	HES1/GATA6/ANXA1/WT1/CDK6/HOXA5/FOXO1/MAP2K1/ETS1/CDKN1C/CLOCK/SOX2/NF1/SRF/CRKL/SOX9/MAPK3/PDGFRA/CREB1/MAPK1/PAX6/AKT1/TGFBR1/SIX1/CDH1/SOX4/HOXA3/IL6/HHEX/WNT5A/GLI2/GATA3/RHEB/PDPK1/SALL1/TBX1/BRAF/GSK3A/BMPR1A/MDK/ALDH1A2/SMAD3/SMO/PITX1/RFX3/RAF1/NKX6-1/GLI1/GSK3B/ARID5B/ONECUT2/RBPJ/THRA/NOG/DKK3/SIDT2/ONECUT1/SOX3/CITED2/PAX8/TG/MEN1/NKX2-2/BMP2/SIX3/HOXD3/NKX6-2/BAK1/ARNTL/NKX2-5/INSR/GC…	94
GO:0010721	negative regulation of cell development	biological process	192/9065	288/17381	3.43507e-07	9.42351e-06	6.78298e-06	1.27825	NTRK3/HES1/WNT3A/PLK2/NOTCH3/FOXO3/BCL2/PAK1/LRP1/NRP1/F2/GAK/CORO1C/IGF1/ADCY6/PITX3/CERS2/INPP5F/G6PD/MED1/APP/PTK2/LRP4/DPYSL3/ARHGDIA/SNAPIN/SOX2/JAG1/NF1/DICER1/ERBB4/BMP7/SMAD4/SOX9/TP73/NOTCH1/PAX6/STAT3/LDLR/MDM2/LPAR1/RHOA/DLX1/TERT/NPPC/ZNF365/ASPM/TJP2/RFLNB/MYCN/EPHA4/PTPRG/SPART/DDX6/RNF6/YWHAH/WNT5A/SPP1/FBN1/RCC2/DMTN/BAG5/DTX1/LGALS1/CALR/ACTN4/HDAC2/RAPGEF2/EIF4E/THY1/BCL11A/RAB2…	192
GO:1903052	positive regulation of proteolysis involved in cellular protein catabolic process	biological process	130/9065	185/17381	3.47724e-07	9.50823e-06	6.84397e-06	1.34734	PLK2/CEBPA/HSPA1A/CTSC/OSBPL7/RNF138/ANKIB1/PIAS1/FBXW7/ANAPC16/PTK2/TRIB2/AKT1/LRRK2/MDM2/UBE2C/CDC20/BUB1B/CDK1/FBXO5/BTRC/PSMD9/SOCS4/CSNK1A1/MAD2L1/NOP53/RGN/CCDC22/PSME1/CCNB1/CAV1/AXIN1/UBA52/PSMD3/UBB/BAG6/PSMB2/RACK1/ANAPC1/DVL1/PSMD4/FZR1/PSMD11/XBP1/RAD23A/USP5/SKP1/PSMC1/PLK1/KEAP1/PSMB3/PSMA7/UBQLN2/PSMC5/PTEN/SMURF1/PSMD2/UBC/ATPIF1/PSMD6/UBQLN1/PSMC4/RNF40/PSMD1/PSME3/PSMD7/ARIH2/AU…	130
GO:0045930	negative regulation of mitotic cell cycle	biological process	202/9065	305/17381	3.58186e-07	9.76261e-06	7.02707e-06	1.26987	PLK2/CCND1/CDKN1A/E2F1/CDC14A/CHEK1/BCL2/CDC14B/CENPJ/MSH2/EGFR/TTK/BRCA1/ATM/EP300/HMGA2/EZH2/CNOT6/CDKN1B/HRAS/TP53/BMP7/BRD7/SCRIB/RB1/TIMP2/TP73/MDM2/ZFP36L2/BAX/GADD45A/DONSON/FANCI/KNTC1/TRIP13/NDC80/BUB1B/CTDSP2/CDK1/TOP2A/TICRR/PCNA/CDT1/KANK2/ZWINT/BLM/SOX4/GAS1/NACC2/RPA2/TNKS1BP1/BTG3/PSMD9/CNOT4/TOM1L2/ZNF385A/MDC1/DYNC1LI1/MRE11/MAD2L1/NOP53/CENPF/ZNF207/PSME1/SFN/CCNB1/RAD9A/UBA52/P…	202
GO:0033673	negative regulation of kinase activity	biological process	183/9065	273/17381	3.6282e-07	9.857e-06	7.09501e-06	1.28527	SPRED1/CEBPA/CDKN1A/PDCD4/RGS3/SNX6/CORO1C/PREX1/ADAR/MAPK7/CSK/PRKAR2A/CDKN1C/IGF1R/PPP2R5A/CDKN1B/HNRNPU/NF1/BMP7/FABP4/SIRT1/CDKN2A/RB1/ERRFI1/ILK/TP73/TRIB2/AKT1/GADD45A/PRDX3/WWTR1/NF2/HMGCR/IL6/SMCR8/HHEX/MIDN/ADARB1/DUSP8/SOCS4/TSG101/SH3BP5/NUP62/SPRED2/PPP1R1C/GSTP1/SPRY2/RGN/PTPN22/MYOCD/HIPK3/PTPN1/SFN/THY1/CAV1/DUSP7/PDPK1/RACK1/QARS/DVL1/TSC2/DUSP18/PLK1/DUSP3/NPM1/TRIM27/WARS/PARK7/…	183
GO:0010769	regulation of cell morphogenesis involved in differentiation	biological process	174/9065	258/17381	3.76213e-07	1.0188e-05	7.33325e-06	1.29311	NTRK3/WNT3A/CDC42/ZEB2/RAB21/PAK1/NRP1/CORO1C/SHTN1/PREX1/UST/BDNF/CRK/MAP2K1/VEGFA/FN1/PTK2/LRP4/ARHGDIA/TWF2/SRF/CRKL/NTRK2/ILK/DNM2/BMPR2/LRRK2/PDPN/RHOA/CXCL12/LIMS1/PLXNC1/ITPKA/EPHA4/NDEL1/LRP8/STK11/PPP1R9A/SPART/PTPRD/RNF6/YWHAH/RAB11A/WNT5A/SPP1/RCC2/DMTN/UNC13D/CALR/PLXNA4/CDH4/ACTN4/FLNA/TUBB2B/RAPGEF2/CTTN/CAPRIN1/IST1/PQBP1/SEMA4D/PLXNB2/VAMP7/L1CAM/THY1/EPHA7/TTL/TIAM1/BRAF/CUX1/MAP…	174
GO:2000756	regulation of peptidyl-lysine acetylation	biological process	48/9065	57/17381	3.80156e-07	1.02475e-05	7.37606e-06	1.61463	CHEK1/SET/BRCA1/MECP2/LIF/RPS6KA5/SPI1/SMAD4/MAPK3/BRD7/SIRT1/SNAI2/SOX4/SIN3A/KAT2A/HDAC2/HINT2/SMARCB1/MYOCD/NOC2L/GATA3/CTBP1/KMT2A/WBP2/TGFB1/PPARGC1A/IWS1/RUVBL2/ARRB1/SETD5/TADA2B/KAT7/MUC1/ZNF451/TWIST1/RPS6KA4/FLCN/TADA2A/SDR16C5/EID1/TAF7/CTCF/PIWIL2/PYGO2/IL1B/HDAC8/NOS1/GATA2	48
GO:0060828	regulation of canonical Wnt signaling pathway	biological process	168/9065	248/17381	3.80842e-07	1.02475e-05	7.37606e-06	1.29887	WNT3A/FOXO3/FOXO1/CDK14/LRP4/CYLD/COL1A1/NFKB1/DVL2/SOX2/SOX9/HDAC1/IGFBP2/XIAP/ILK/FGF9/NOTCH1/LRRK2/SNAI2/DDX3X/LEF1/ASPM/SULF2/WWTR1/BTRC/SOX4/PSMD9/WNT5A/CSNK1A1/TMEM64/FGFR2/WLS/JUP/DKK1/EMD/TRPM4/CTDNEP1/PSME1/FOLR1/UBR5/G3BP1/CDH2/SRC/LGR4/CAV1/AXIN1/UBA52/ZNF703/PSMD3/UBB/CCAR2/BAMBI/PPP1CA/PSMB2/TMEM131L/TNKS/FRZB/DVL1/CCNY/GSK3A/PSMD4/PSMD11/LIMD1/JADE1/PSMC1/PSMB3/PSMA7/PSMC5/NRARP/KRE…	168
GO:0072001	renal system development	biological process	187/9065	280/17381	4.02682e-07	1.08006e-05	7.7742e-06	1.28053	MEF2C/HES1/NOTCH3/BCL2/WT1/RIDA/NRP1/ITGB4/SDC4/FGFR1/VEGFA/NFIA/FGF2/LRP4/HOXB7/CDKN1C/LIF/WNK4/WNT9B/JAG1/NF1/BMP7/SMAD4/SOX9/PDGFRA/PTCH1/MTSS1/ACVR2B/BCL2L11/ILK/PODXL/TEK/TP73/IFNG/NOTCH1/SDC1/SMAD5/LRRK2/SMAD2/TGFBR1/NIPBL/BAX/BASP1/SIX1/MPST/SULF2/WWTR1/SEC61A1/SOX4/EPHA4/SIX4/WNT5A/STAT1/FBN1/FGFR2/ITGA6/KLHL3/RGN/CENPF/MME/MYOCD/GLI2/ITGA3/GATA3/LGR4/RDH10/EPHA7/HOXC11/MYC/BAG6/MAGED1/SA…	187
GO:0006006	glucose metabolic process	biological process	134/9065	192/17381	4.32277e-07	1.15576e-05	8.31908e-06	1.33817	AKT2/SLC45A3/TPI1/OMA1/FOXO1/SLC25A1/GPD2/ADPGK/PKM/IGF1/PGM2/SERP1/G6PD/INPPL1/IRS1/CPT1A/PPARA/IGF2/HK2/SIRT1/IGFBP5/PMAIP1/AKT1/HMGB1/PHLDA2/SESN2/C1QTNF2/IL6/MIDN/PRKAA1/KAT2A/RGN/SLC25A10/SRC/EPM2AIP1/GPI/DCXR/MTOR/SLC35B4/GSK3A/ENO1/PFKP/GALM/NISCH/MAEA/GAPDH/BRAT1/PDHA1/RANBP2/PPARGC1A/PPP1CB/PGAM1/USF1/SOGA1/ALDOA/NCOA2/TIGAR/MDH2/SLC37A4/PPARD/ATF3/ATF4/GOT2/BPGM/SERPINA12/SLC25A13/MDH1/…	134
GO:0043967	histone H4 acetylation	biological process	52/9065	63/17381	4.53343e-07	1.20825e-05	8.69688e-06	1.58259	BRCA2/BRCA1/EP300/PHF20/SPI1/SIRT1/JADE3/LEF1/KANSL1/EPC1/KAT2A/SMARCB1/CTBP1/KMT2A/TRRAP/CHD5/JADE1/ELP3/MSL3/BRD8/MCRS1/HCFC1/IWS1/RUVBL1/RUVBL2/DMAP1/APBB1/EP400/ING3/USP22/BEND3/TADA3/ARRB1/ACTL6A/OGT/IRF4/KAT7/MSL1/MUC1/HAT1/MORF4L2/NAA50/NAA40/JADE2/PER1/MORF4L1/MEAF6/YEATS4/MSL2/KANSL3/NCOA1/ING4	52
GO:0001843	neural tube closure	biological process	68/9065	87/17381	4.58839e-07	1.21732e-05	8.76217e-06	1.49864	TRAF6/ZEB2/RARG/ARID1A/SUFU/SDC4/DVL2/PTCH1/SCRIB/PFN1/VASP/MTHFD1/TMED2/WNT5A/DLC1/KAT2A/FOLR1/KDM2B/PLXNB2/GLMN/MTHFD1L/SKI/PRKACA/DVL1/TSC2/TGFB1/TEAD2/TSC1/PTK7/SEMA4C/ABL1/SEC24B/RALA/LRP2/MED12/SFRP1/SETD2/VANGL2/FZD6/TRIM71/PRICKLE1/NOG/LRP6/ADM/BBS4/KDM6A/NPHP3/APAF1/TWIST1/RARA/PAX2/DVL3/ALX1/ARHGAP35/CC2D2A/PRKACB/FZD1/SPINT2/FZD2/SHROOM3/TGFB2/BCL10/LIAS/STIL/PHACTR4/TULP3/SALL4/GRHL2	68
GO:0009952	anterior/posterior pattern specification	biological process	140/9065	202/17381	4.61083e-07	1.21732e-05	8.76217e-06	1.32887	HES1/CDX2/WNT3A/GATA4/ZEB2/WT1/HOXA5/RARG/HOXD10/HOXB8/HOXA7/HOXD8/HOXC8/ATM/EP300/HOXB7/MEOX2/ETS2/HOXA10/SRF/RNF2/CRKL/SMAD4/ACVR2B/NOTCH1/PAX6/BMPR2/SMAD2/TGFBR1/BASP1/LEF1/TMED2/HOXC4/HOXA3/HHEX/HOXB5/ACVR2A/WNT5A/FRS2/WLS/DKK1/KAT2A/GLI2/KDM2B/POFUT1/AXIN1/HOXC11/KMT2A/PBX3/HIPK2/SKI/CTNNBIP1/TBX1/CTNNB1/BPTF/BMPR1A/SCMH1/FOXC1/ALDH1A2/SMAD3/MIB1/NRARP/YY1/SMO/GRSF1/CRB2/ARC/AURKA/MED12/HOXD…	140
GO:0043393	regulation of protein binding	biological process	140/9065	202/17381	4.61083e-07	1.21732e-05	8.76217e-06	1.32887	MEF2C/STMN1/MET/WNT3A/CDC42/PLK2/HDAC4/BCL2/ROCK1/LRP1/PTPRF/NRP1/ANXA2/BDNF/CRK/EP300/APP/CYLD/PPARA/SNAPIN/MAPK3/MAPRE1/LRRK2/TGFBR1/MAPK8/BAX/PHLDA2/LEF1/HSP90AB1/TERT/NMD3/TGFBR3/TMC8/EPHA4/MAPRE3/RAN/WNT5A/IFIT1/SLPI/USP33/DKK1/RALB/RAPGEF2/IFIT2/FRMD7/RIPK2/SRC/CAV1/EPB41/HIPK2/BAMBI/PPP1CA/TIAM1/PRKACA/CTNNBIP1/DVL1/DDX11/GTPBP4/PLK1/PLXND1/PARK7/TICAM1/SPAG9/RUVBL2/PCBD1/ABL1/AURKA/TMBIM6…	140
GO:0030278	regulation of ossification	biological process	129/9065	184/17381	4.73082e-07	1.24509e-05	8.96211e-06	1.34425	MEF2C/ACVR1/CEBPA/HDAC4/BCL2/CDK6/PDLIM7/CYR61/HAND2/IGF1/SUFU/CHSY1/DDX5/TAC1/EGR2/PTK2/CLIC1/LRP4/P2RX7/CSF1/JAG1/BMP7/HIF1A/SOX9/MAPK3/PTCH1/ACVR2B/MAPK1/IGFBP5/ILK/SLC8A1/NOTCH1/IFITM1/BMPR2/SMAD5/SNAI2/RUNX2/CEBPB/NIPBL/NPPC/RFLNB/IL6/RASSF2/ACVR2A/WNT5A/TMEM64/BGLAP/ISG15/FGFR2/DKK1/TRPM4/SEMA4D/GNAS/SKI/PRKACA/CTNNBIP1/TOB2/CTNNB1/FBN2/TGFB1/BMPR1A/ATP6AP1/LIMD1/BCOR/TXLNG/SMAD3/KREMEN1/SM…	129
GO:0021915	neural tube development	biological process	113/9065	158/17381	4.76737e-07	1.2508e-05	9.00321e-06	1.37129	HES1/WNT3A/TRAF6/ZEB2/RARG/ARID1A/SUFU/SDC4/IFT52/DVL2/NF1/BMP7/HIF1A/PTCH1/SCRIB/NOTCH1/PAX6/PFN1/EPHA2/VASP/MTHFD1/TMED2/SOX4/LUZP1/WNT5A/DLC1/KAT2A/GLI2/FOLR1/KDM2B/PLXNB2/GLMN/PLOD3/MTHFD1L/SKI/PRKACA/DVL1/TSC2/TGFB1/FKBP8/ITPK1/ALDH1A2/TEAD2/TSC1/MIB1/PTK7/SEMA4C/CFL1/TCTN1/SALL2/SMO/AMBRA1/ABL1/SEC24B/RALA/GDF7/LRP2/MED12/SFRP1/STK3/SETD2/WNT1/NODAL/VANGL2/ZFP36L1/FZD6/ATP6AP2/STK4/SOX11/TR…	113
GO:0051961	negative regulation of nervous system development	biological process	179/9065	267/17381	4.7886e-07	1.25247e-05	9.01521e-06	1.28543	NTRK3/HES1/WNT3A/PLK2/TLR2/NOTCH3/FOXO3/LRP1/NRP1/F2/GAK/ADCY6/SUFU/PITX3/CERS2/INPP5F/MED1/APP/PTK2/LRP4/DPYSL3/ARHGDIA/SNAPIN/SOX2/JAG1/NF1/DICER1/ERBB4/BMP7/SOX9/TP73/IFNG/NOTCH1/PAX6/STAT3/LDLR/MDM2/LPAR1/RHOA/DLX1/TERT/TNFRSF21/ZNF365/ASPM/MYCN/EPHA4/PTPRG/SPART/DDX6/RNF6/YWHAH/WNT5A/SPP1/BAG5/DTX1/LGALS1/CALR/HDAC2/RAPGEF2/EIF4E/FIG4/THY1/BCL11A/RAB29/EPHA7/FKBP4/ARHGEF2/SKI/KCTD11/PRKACA/G…	179
GO:0051028	mRNA transport	biological process	108/9065	150/17381	4.92964e-07	1.28239e-05	9.23057e-06	1.38051	POM121/SRSF11/CPSF1/SRSF9/SRSF1/SRSF7/DDX39A/NDC1/POLR2D/XPO1/NUP58/RBM8A/HHEX/WDR33/GLE1/SRSF2/SRSF3/NUP62/SRSF6/MX2/SRRM1/SYMPK/CPSF3/SLBP/G3BP2/SRSF4/ZC3H11A/NUP50/NXT2/POM121C/HNRNPA1L2/EIF4E/NUP160/NUP210/SRSF5/HNRNPA1/HNRNPA3/IGF2BP3/IGF2BP1/TNKS/NUP153/U2AF2/RNPS1/SMG5/IGF2BP2/NCBP2/RANBP2/XPO7/SMG1/PABPN1/NUTF2/NUP214/CASC3/AAAS/NUP37/BICD2/IWS1/CHTOP/EIF4A3/QKI/NXT1/POLDIP3/SMG6/AKAP8L/T…	108
GO:0072655	establishment of protein localization to mitochondrion	biological process	132/9065	189/17381	4.93344e-07	1.28239e-05	9.23057e-06	1.33912	HES1/E2F1/BAP1/BCL2/YWHAQ/HPS4/MTX1/FBXW7/HSPD1/HSPA4/TP53/HK2/BCL2L11/TP73/YWHAZ/PMAIP1/AKT1/LRRK2/MAPK8/BAX/STARD7/HHAT/TIMM50/FAM20B/RAC2/DYNLL2/YWHAH/NKAP/KAT2A/MFN2/SFN/CSNK2A2/TIMM23/HSP90AA1/WDR46/SREBF1/NMT1/HTRA2/GSK3A/U2AF2/PPP3R1/USP36/MYBPC1/HUWE1/PPP1R13B/SLC25A6/YWHAE/DNAJA1/HSPH1/TOMM5/HSPA1L/RUVBL1/TOMM40/SAE1/ATPIF1/TOMM20/VPS11/HAX1/SREBF2/ARIH2/TOMM70/YWHAB/PDCD5/PSMD8/HK1/PARL…	132
GO:1900180	regulation of protein localization to nucleus	biological process	152/9065	222/17381	4.95618e-07	1.28434e-05	9.24458e-06	1.3128	WNT3A/TLR2/CDKN1A/PPM1A/F2/EGFR/IGF1/TMSB4X/SUFU/MED1/FAF1/MAPK7/PIK3R2/APP/CYLD/LIF/NF1/ERBB4/BMP7/SMAD4/SIRT1/MAPK1/TLR4/NFKBIA/PTGS2/IFNG/AKT1/LRRK2/SNAI2/RHOA/TGFBR1/NUP58/ECT2/HSP90AB1/TERT/NMD3/SESN2/CDK1/NLRP3/CDH1/SULF2/WWTR1/NF2/CCT3/IL6/STK11/CD2AP/NUP62/SIN3A/JUP/G3BP2/EMD/FLNA/RASSF5/SRI/CCDC22/UBR5/SRC/BAMBI/MTOR/TRIM28/TGFB1/BMPR1A/CCT5/PLK1/NPM1/PARP10/CCT7/KEAP1/PARK7/PARP1/MCRS1/…	152
GO:0000187	activation of MAPK activity	biological process	103/9065	142/17381	5.00428e-07	1.29282e-05	9.30567e-06	1.39077	CXCR4/NTRK3/IRAK2/TRAF6/IRAK1/SOD1/THBS1/HACD3/IQGAP3/IGF1/MAP2K1/FGF2/P2RX7/PEA15/CD40LG/MAP3K11/MAPK3/MAPK1/TLR4/TP73/NTF3/LRRK2/LPAR1/CDK1/C1QTNF2/C5/PRKAA1/SHC1/WNT5A/MAP3K21/FRS2/KIT/ITGA1/PTPN1/RIPK2/MAP4K2/AXIN1/UBA52/UBB/DUSP7/UBE2N/ERP29/PTPN11/MAP3K2/DBNL/SPAG9/MAPKAPK2/UBC/SYK/SHC2/ARRB1/TAB2/IKBKG/CD81/ERN1/MAP3K7/MAP2K7/TNF/DUSP5/ADORA2B/DAB2IP/MDFIC/UBE2V1/MADD/KARS/S1PR2/TGFA/MAPKA…	103
GO:0010389	regulation of G2/M transition of mitotic cell cycle	biological process	135/9065	194/17381	5.11415e-07	1.31702e-05	9.47986e-06	1.33426	CCND1/ACTR1A/CENPJ/CEP63/RAD51C/CDK6/SSNA1/TUBA1A/BRCA1/ATM/HMGA2/MECP2/APP/ALMS1/MAPRE1/CDK4/CCP110/PCNT/DONSON/FANCI/CDK1/CEP41/TICRR/HAUS8/BLM/PSMD9/CKAP5/RAB11A/RCC2/SIN3A/SFI1/MRE11/NOP53/CENPF/PSME1/CCNB1/TUBB/UBA52/PSMD3/HSP90AA1/UBB/NDE1/PSMB2/PRKACA/PSMD4/PSMD11/BRD4/DYNC1H1/VPS4A/SKP1/PSMC1/CTC1/PLK1/CEP57/FOXN3/YWHAE/CEP152/PSMB3/PSMA7/ORAOV1/TAOK3/PSMC5/TPX2/TUBG1/CDK5RAP2/PSMD2/UBC/P…	135
GO:0006109	regulation of carbohydrate metabolic process	biological process	124/9065	176/17381	5.12923e-07	1.31702e-05	9.47986e-06	1.35088	AKT2/HDAC4/SLC45A3/FOXO1/IGF1/POM121/PRKCE/IRS1/P2RX7/NFKB1/PPARA/IGF2/HIF1A/SIRT1/IGFBP5/STAT3/PMAIP1/AKT1/NDC1/HMGB1/NUP58/PHLDA2/SESN2/C1QTNF2/IL6/MIDN/PRKAA1/NUP62/NUP50/KAT2A/POM121C/RGN/PRKAG1/CLTC/NUP160/NUP210/SRC/EPM2AIP1/NUP153/MTOR/SLC35B4/GSK3A/TGFB1/MAEA/RANBP2/PPARGC1A/MLXIP/PPP1CB/PGAM1/SOGA1/PFKFB4/NCOA2/TIGAR/NUP214/AAAS/NUP37/AP2A1/BPGM/TPR/NUPL2/SERPINA12/PRKAA2/ADIPOR1/DYRK2/N…	124
GO:0007254	JNK cascade	biological process	138/9065	199/17381	5.27242e-07	1.34968e-05	9.71488e-06	1.32964	IRAK2/CDC42/TRAF6/IRAK1/ZEB2/PDCD4/PAK1/HACD3/EGFR/APP/IGF1R/DVL2/EDN1/CD40LG/HRAS/MAP3K11/CRKL/TLR4/TP73/CTGF/RB1CC1/AKT1/MAPK8/GADD45A/HMGB1/PHLPP1/EPHA4/RASSF2/WNT5A/MAP3K21/GSTP1/F2RL1/DKK1/PTPN22/ZNF622/HIPK3/PTPN1/RIPK2/MAP4K2/AXIN1/UBA52/UBB/HIPK2/MINK1/TIAM1/UBE2N/DUSP3/MAP3K2/TAOK3/RPS3/DNAJA1/DBNL/SPAG9/RAPGEF1/ITCH/UBC/TAOK2/SYK/FLT4/COPS5/MAP3K4/TAB2/FKTN/IKBKG/SFRP1/STK3/ERN1/MAP3K7/…	138
GO:0031667	response to nutrient levels	biological process	272/9065	426/17381	5.3122e-07	1.35465e-05	9.75068e-06	1.22424	UCP2/GATA4/CCND1/CDKN1A/FOXO3/DNMT3A/BCL2/JUN/OMA1/DNMT3B/SOD1/FOXO1/EHMT2/EGFR/SLC16A1/FSTL1/PKM/CHSY1/G6PD/MED1/VCAM1/KLF10/COL1A1/PIM1/WNT9B/HMOX1/PPARA/FAS/TP53/ACVR1C/BMP7/PPARG/SRF/MAPK3/SIRT1/MAPK1/IGFBP2/PTGS2/SLC8A1/TGFBR2/MGMT/PMAIP1/LDLR/BMPR2/AKT1/LRRK2/SNAI2/MDM2/MMP7/MAPK8/SESN2/MAX/TYMS/KANK2/HMGCR/IL6/PRKAA1/SRSF2/HMGCS1/GLUL/FNIP1/BGLAP/SPP1/GSTP1/STK24/USP33/SLC27A4/GNAI2/RALB/K…	272
GO:0034332	adherens junction organization	biological process	91/9065	123/17381	5.32402e-07	1.35465e-05	9.75068e-06	1.41855	CDC42/BCL2/ROCK1/THBS1/NRP1/CORO1C/SDC4/VEGFA/CADM1/CSK/PTK2/FERMT2/KDR/TEK/PTPRK/RHOA/LIMS1/ACTN1/CDH1/RASSF8/DLC1/RCC2/DMTN/JUP/CDH4/PHLDB2/CTTN/TBCD/CDH13/THY1/CDH2/SRC/VCL/ZNF703/PDPK1/PKP2/CTNNB1/PIP5K1A/CTNNA1/TSC1/SMAD3/PIP5K1C/PTEN/CTNND1/IQGAP1/RDX/TAOK2/SLC9A1/ABL1/CAMSAP3/DSP/PPM1F/PTPN23/HIPK1/SFRP1/CDH11/RAC1/NUMB/ROCK2/RAB8B/PTPRJ/ITGA2/NECTIN1/MMP14/SMAD7/FMN1/CDH6/GREM1/CDH7/CADM2…	91
GO:0051101	regulation of DNA binding	biological process	84/9065	112/17381	5.41243e-07	1.373e-05	9.88274e-06	1.43803	HES1/WNT3A/E2F1/TRAF6/JUN/HAND2/IGF1/TMSB4X/KLF4/HMGA2/LIF/CALM3/HMOX1/PPARA/CALM2/PPARG/RB1/NFKBIA/IFNG/MAPK8/HMGB1/LEF1/CDCA5/CDT1/RSF1/HABP4/SIN3A/KAT2A/HDAC2/SRI/EDF1/MYOCD/GATA3/WAPL/HAND1/HIPK2/TNKS/SKI/CTNNBIP1/TRIM28/CTNNB1/TGFB1/PARK7/FOXC1/PARP1/SMO/PINX1/ZFP90/CEBPG/NSD1/IRF4/SP100/SOX11/ITGA2/MMP9/DOT1L/HEY2/WFIKKN2/EGF/BCL3/TWIST1/SUMO1/DDIT3/PRKN/ZNF675/GTF2B/TFAP4/PITX2/HMGB2/MSX2/…	84
GO:0035065	regulation of histone acetylation	biological process	45/9065	53/17381	5.4671e-07	1.3827e-05	9.9526e-06	1.62796	CHEK1/SET/BRCA1/MECP2/LIF/RPS6KA5/SPI1/SMAD4/MAPK3/BRD7/SIRT1/SNAI2/SIN3A/KAT2A/SMARCB1/MYOCD/NOC2L/GATA3/CTBP1/KMT2A/WBP2/TGFB1/PPARGC1A/IWS1/RUVBL2/ARRB1/SETD5/TADA2B/KAT7/MUC1/ZNF451/TWIST1/RPS6KA4/FLCN/TADA2A/SDR16C5/EID1/TAF7/CTCF/PIWIL2/PYGO2/IL1B/HDAC8/NOS1/GATA2	45
GO:0001890	placenta development	biological process	106/9065	147/17381	5.5522e-07	1.40002e-05	1.00772e-05	1.3826	HES1/CDX2/CEBPA/CCNF/SOD1/GRB2/EGFR/ARID1A/CYR61/GJA1/MAP2K1/MED1/PTK2/CDKN1C/LIF/JUNB/CDKN1B/IGF2/BMP7/HIF1A/PPARG/SP3/MAPK1/PTGS2/BMPR2/AKT1/CEBPB/PRDX3/KRT19/PHLDA2/LEF1/GJB2/HSP90AB1/NSDHL/TMED2/SPP1/FGFR2/GJB3/LHX4/ZNF568/HAND1/RPS6/TRIM28/BPTF/E2F8/ASH1L/DAZAP1/PPARD/STOX2/MAP3K4/STK3/SETD2/ITGB8/NODAL/RXRA/PRDM1/ZFP36L1/STK4/RBPJ/DNAJB6/STC2/ADA/SNAI1/WNT2/ADM/PKD1/ASCL2/HEY2/FZD5/MEN1/CTS…	106
GO:0007411	axon guidance	biological process	156/9065	229/17381	5.75957e-07	1.44191e-05	1.03788e-05	1.30616	CXCR4/TUBB3/WNT3A/KRAS/GRB2/PDLIM7/NRP1/BDNF/EGR2/VEGFA/MAPK7/APP/PTK2/RPS6KA5/HRAS/ERBB2/BMP7/SIAH1/SMAD4/MAPK3/CREB1/PTCH1/MAPK1/ARTN/NCAM1/PAX6/BMPR2/CXCL12/VASP/NRP2/EPHA4/NFIB/VLDLR/GRB10/SHC1/BCL11B/WNT5A/FRS2/B3GNT2/USP33/KIF5B/PLXNA4/CDH4/LHX4/TUBB2B/GPC1/DOK6/GLI2/GATA3/L1CAM/SRC/NR4A3/EPHA7/DVL1/ROBO2/DPYSL5/PTPN11/DOK4/SLIT1/EFNB1/UNC5B/GAB1/ENAH/DOK2/PRKCA/SPTBN1/MEGF8/SPTBN2/APBB2/SP…	156
GO:0046777	protein autophosphorylation	biological process	159/9065	234/17381	5.76971e-07	1.44191e-05	1.03788e-05	1.30283	NTRK3/NLK/IRAK1/JUN/PAK1/GRB2/EGFR/TTK/UHMK1/ATM/FGFR1/VEGFA/CSK/PTK2/PRKD2/PIM1/IGF1R/CALM3/DDR1/ERBB2/ERBB4/MAP3K11/CALM2/MAPK3/PDGFRA/NTRK2/FLT1/KDR/ERRFI1/TEK/FLT3/AKT1/LRRK2/CSNK2A1/MELK/EPHA4/TNKS1BP1/RAP2C/STK11/RASSF2/YES1/MAP3K21/KIT/ABL2/FGFR2/STK24/CAD/MRE11/PRKG2/TRIM24/CAMK2G/CALM1/THY1/SRC/DYRK1A/EPHA7/CAV1/MINK1/STK16/CDK12/PDPK1/MTOR/PRKACA/TRIM28/BCR/PIM3/ULK3/FER/MEX3B/SMG1/EIF2…	159
GO:0110053	regulation of actin filament organization	biological process	159/9065	234/17381	5.76971e-07	1.44191e-05	1.03788e-05	1.30283	STMN1/MET/CDC42/ROCK1/PAK1/GRB2/TPM1/NRP1/TMSB4X/SH3PXD2B/PLEKHG2/PREX1/SDC4/TAC1/PRKCE/ALMS1/TWF1/TWF2/CTGF/PFN1/WASF2/LPAR1/RHOA/TGFBR1/CXCL12/VASP/CDC42EP4/ABI2/NF2/SPIRE1/LIMA1/CAPZB/PPP1R9A/DLC1/CAPZA1/ARPC5/DMTN/F2RL1/SYNPO2L/PHLDB2/CTTN/CAPG/TMOD3/PLEKHH2/FRMD7/ARHGAP28/ARF1/CORO1B/MTOR/BRAF/SORBS3/BAIAP2/FER/SSH2/JMY/MTPN/ARFGEF1/TRIM27/WASHC2C/CIT/CYFIP1/TSC1/SMAD3/SPTBN1/SPTBN2/CFL1/PPF…	159
GO:0043487	regulation of RNA stability	biological process	114/9065	160/17381	5.82874e-07	1.45236e-05	1.0454e-05	1.36613	E2F1/HSPA1A/RNASEL/SET/HNRNPD/HNRNPU/YWHAZ/AKT1/ZFP36L2/XPO1/PSMD9/TARDBP/PDE12/EIF4G1/ANP32A/YTHDF2/PSME1/IGF2BP3/CPEB3/IGF2BP1/YBX1/UBA52/PSMD3/UBB/PAIP1/PSMB2/LARP1/MTOR/HNRNPC/SAMD4B/MEX3D/PSMD4/PSMD11/PABPC1/GIGYF2/HSPA8/PSMC1/SMG5/HNRNPR/IGF2BP2/SERBP1/PSMB3/PSMA7/NUP214/YBX3/PSMC5/PRKCA/MAPKAPK2/PSMD2/UBC/HNRNPA0/PUM1/PSMD6/QKI/PSMC4/PSMD1/PSME3/PSMD7/SMG6/EXOSC1/YWHAB/PSMA2/KHSRP/PSMD8/CN…	114
GO:0001503	ossification	biological process	241/9065	373/17381	5.98246e-07	1.48626e-05	1.0698e-05	1.23884	MEF2C/ACVR1/WNT3A/CEBPA/HDAC4/TRAF6/BCL2/H3F3B/CDK6/PDLIM7/MRC2/EGFR/CYR61/HAND2/IGF1/TMSB4X/SH3PXD2B/SUFU/CHSY1/TPM4/DDX5/ADAR/TAC1/EGR2/INPPL1/RUNX3/MMP13/PTK2/CLIC1/LRP4/KLF10/COL1A1/P2RX7/JUNB/CSF1/HNRNPU/RRBP1/SOX2/JAG1/NF1/IGF2/BMP7/HIF1A/MN1/SOX9/MAPK3/SP3/PTCH1/ACVR2B/MAPK1/IGFBP5/ILK/PTGS2/SLC8A1/FGF9/TEK/NOTCH1/CTGF/IFITM1/BMPR2/SMAD5/AKT1/SNAI2/RUNX2/RHOA/CEBPB/NIPBL/LEF1/EPHA2/NPPC/AT…	241
GO:0038128	ERBB2 signaling pathway	biological process	35/9065	39/17381	6.07094e-07	1.50381e-05	1.08243e-05	1.72072	PTPN12/KRAS/GRB2/EGFR/ERBB3/HRAS/ERBB2/ERBB4/CPNE3/CDC37/ERBIN/SHC1/PTPRR/BTC/SRC/UBA52/HSP90AA1/UBB/GAB1/PRKCA/UBC/PIK3CA/CUL5/PIK3R1/EREG/NRG4/EGF/RPS27A/NRAS/PTK6/NRG2/HBEGF/SOS1/NRG1/PTPN18	35
GO:1903747	regulation of establishment of protein localization to mitochondrion	biological process	94/9065	128/17381	6.17316e-07	1.52464e-05	1.09743e-05	1.40807	HES1/E2F1/BAP1/BCL2/YWHAQ/HPS4/FBXW7/TP53/BCL2L11/TP73/YWHAZ/PMAIP1/LRRK2/MAPK8/STARD7/HHAT/FAM20B/RAC2/DYNLL2/YWHAH/NKAP/KAT2A/SFN/CSNK2A2/WDR46/SREBF1/NMT1/HTRA2/GSK3A/U2AF2/PPP3R1/USP36/MYBPC1/HUWE1/PPP1R13B/YWHAE/DNAJA1/HSPH1/HSPA1L/RUVBL1/SAE1/ATPIF1/VPS11/HAX1/SREBF2/ARIH2/YWHAB/PDCD5/PSMD8/PARL/ATG13/ACTL6A/TFDP1/LEPROT/PLAGL2/SELENOI/YWHAG/BAG4/SIRT4/SH3GLB1/TFDP2/BMF/RHOU/UBE2D3/KCNN3/MA…	94
GO:0060021	palate development	biological process	71/9065	92/17381	6.24519e-07	1.53792e-05	1.10699e-05	1.47971	MEF2C/WNT3A/ANP32B/HAND2/MEOX2/WNT9B/SMAD4/PDGFRA/ACVR2B/TGFBR2/SNAI2/SMAD2/FOXF2/TGFBR1/PRDM16/LEF1/TGFBR3/WNT5A/SATB2/SKI/TBX1/TBX2/BMPR1A/BCOR/INSIG1/MSC/INHBA/PLEKHA1/ARID5B/SGPL1/TIPARP/CHD7/SOX11/ASPH/LRP6/SNAI1/GLI3/OSR1/ZNF84/DLX6/WFIKKN2/TWIST1/TFAP2A/SUMO1/INSIG2/EPHB2/BNC2/NPRL3/GDF11/ALX1/GABRB3/WNT7A/EPHB3/PRRX1/FZD1/TSHZ1/SHH/FOXE1/FZD2/DHRS3/JAG2/TGFB2/WDPCP/PAK1IP1/SOS1/PYGO2/TBX3…	71
GO:1901028	regulation of mitochondrial outer membrane permeabilization involved in apoptotic signaling pathway	biological process	40/9065	46/17381	6.34647e-07	1.55831e-05	1.12166e-05	1.66728	E2F1/BCL2/HSPA1A/YWHAQ/TP53/BCL2L11/TP73/YWHAZ/PMAIP1/MAPK8/BAX/DYNLL2/YWHAH/SFN/TMEM14A/NMT1/GSK3A/PPP3R1/PPP1R13B/YWHAE/SLC25A5/ATPIF1/BOK/YWHAB/ACAA2/GSK3B/TFDP1/YWHAG/TFDP2/SLC35F6/BMF/HIP1R/MUL1/DYNLL1/BAK1/FZD9/BID/TP63/MPV17L/CASP8	40
GO:0048705	skeletal system morphogenesis	biological process	145/9065	211/17381	6.43043e-07	1.57433e-05	1.1332e-05	1.31763	MEF2C/HOXA5/RARG/SH3PXD2B/HOXD10/HOXB8/ZEB1/CHSY1/CHST11/HOXA7/HOXD8/HOXC8/FGFR1/INPPL1/MMP13/COL1A1/HOXB7/P2RX7/WNT9B/BMP7/SOX9/PDGFRA/ACVR2B/TGFBR2/TEK/CTGF/BMPR2/RUNX2/SMAD2/TGFBR1/NIPBL/NPPC/SIX1/MTHFD1/RFLNB/MYCN/WDR60/HOXA3/SIX4/HOXB5/FGFR2/NAB1/SLC39A3/RDH10/AXIN1/GNAS/HOXC11/SATB2/MTHFD1L/SKI/TBX1/CTNNB1/FBN2/TGFB1/FOXN3/FOXC1/INSIG1/NDST1/ANKRD11/SMAD3/MEGF8/PPARGC1B/DLX2/EIF4A3/MED12/SF…	145
GO:0009161	ribonucleoside monophosphate metabolic process	biological process	211/9065	322/17381	6.56771e-07	1.60328e-05	1.15403e-05	1.25642	HDAC4/TPI1/HSPA1A/MSH2/ATP6V0A1/ADPGK/PKM/IGF1/TMSB4X/PRPS1/POM121/ATP6V1B2/MECP2/UMPS/P2RX7/PPARA/HIF1A/HK2/SCRIB/STAT3/NDC1/NUP58/HPRT1/CDK1/ATP5B/TJP2/UQCRQ/COX10/PRKAA1/NUP62/RFK/CAD/NUP50/PDE12/ATP6V1A/POM121C/PRKAG1/NUP160/NDUFS4/NUP210/NT5E/IMPDH1/CCNB1/CYCS/LDHA/COX6B1/UQCRC1/AMPD2/SDHA/GPI/GART/NUP153/ATP5G3/HSPA1B/NDUFB10/ATP5S/TGFB1/ENO1/PFKP/NDUFS7/HSPA8/GAPDH/OGDHL/PFAS/RANBP2/PPARGC…	211
GO:0010822	positive regulation of mitochondrion organization	biological process	120/9065	170/17381	6.63651e-07	1.61539e-05	1.16275e-05	1.35344	HES1/E2F1/BAP1/BCL2/YWHAQ/HPS4/FBXW7/TP53/HIF1A/HK2/BCL2L11/KDR/BBC3/TP73/YWHAZ/PMAIP1/MAPK8/BAX/STARD7/HHAT/FAM20B/CDC37/RAC2/DYNLL2/YWHAH/NKAP/KAT2A/MFN2/SFN/CSNK2A2/MIEF1/WDR46/NMT1/HTRA2/GSK3A/U2AF2/PPP3R1/USP36/MYBPC1/HUWE1/PPARGC1A/PPP1R13B/HTT/YWHAE/PARK7/HSPA1L/RUVBL1/SMURF1/SAE1/ATPIF1/VPS11/APOPT1/SREBF2/BOK/ARIH2/VPS35/YWHAB/PDCD5/VPS13C/PSMD8/DDHD2/ATG13/ACTL6A/GSK3B/PPIF/TFDP1/LEPROT…	120
GO:0008637	apoptotic mitochondrial changes	biological process	92/9065	125/17381	6.86493e-07	1.66618e-05	1.19931e-05	1.41119	E2F1/BCL2/HSPA1A/JUN/MCL1/RHOT1/SOD2/YWHAQ/IGF1/HSPD1/TP53/ERBB4/HK2/BCL2L11/BBC3/TP73/YWHAZ/PMAIP1/AKT1/MAPK8/BAX/TIMM50/DYNLL2/YWHAH/BCL2A1/PRELID1/IFIT2/AIFM2/SFN/TMEM14A/CCAR2/RHOT2/NMT1/GSK3A/PPP3R1/PPP1R13B/PPP2CB/YWHAE/GPX1/SLC25A5/SLC25A4/RTL10/ATPIF1/APOPT1/BOK/VPS35/GGCT/YWHAB/PDCD5/ACAA2/JTB/GCLM/ATF2/BCL2L1/GSK3B/PPIF/TFDP1/YWHAG/TFDP2/SLC35F6/FAM162A/MMP9/BMF/HIP1R/FXN/CAMK2A/MFF/MUL…	92
GO:0061138	morphogenesis of a branching epithelium	biological process	126/9065	180/17381	7.32475e-07	1.77267e-05	1.27596e-05	1.34216	MET/ACVR1/KRAS/ESR1/BCL2/WT1/HOXA5/PAK1/GRB2/NRP1/NOTCH4/FGFR1/MED1/VEGFA/FGF2/HOXB7/CSF1/DDR1/WNT9B/EDN1/BMP7/FGF7/SRF/SMAD4/SOX9/PTCH1/ILK/TGFBR2/NOTCH1/SNAI2/EDNRA/LEF1/EPHA2/SIX1/CLIC4/BTRC/MYCN/IL6/HHEX/SIX4/WNT5A/FRS2/PGR/SPRY2/FGFR2/B4GALT1/GLI2/GNA13/SRC/LGR4/RDH10/TIMELESS/MYC/MAGED1/SALL1/HOXD11/CTNNBIP1/CTNNB1/TGFB1/PLXND1/COL4A1/NRARP/PHB2/SPRY1/SMO/ABL1/FEM1B/PLXNA1/GDF7/HOXD13/SFRP1…	126
GO:0043122	regulation of I-kappaB kinase/NF-kappaB signaling	biological process	164/9065	243/17381	7.5165e-07	1.81387e-05	1.30561e-05	1.29403	PLK2/TLR2/FADD/ESR1/TRAF6/IRAK1/CARD8/PPM1A/TMSB4X/GJA1/FAF1/PRKCE/IKBKB/APP/CYLD/HMOX1/UBE2I/CHUK/BMP7/SIRT1/TLR4/IKBKE/NFKBIA/PTGS2/MTDH/TBK1/AKT1/LPAR1/RHOA/VAPA/ECT2/NLRP3/BTRC/PELI2/TMEM9B/TRIM59/NUP62/C18orf32/STAT1/TRIM22/IFIT5/GSTP1/WLS/LGALS1/F2RL1/G3BP2/FLNA/CCDC22/RHOC/ANKRD17/RIPK2/MIER1/SLC20A1/UBA52/UBB/NDFIP2/PDPK1/UBE2N/CTNNB1/BRD4/USP10/ASH1L/TFG/TICAM1/AKAP13/MAP3K3/TNIP1/UBC/CX…	164
GO:0003281	ventricular septum development	biological process	53/9065	65/17381	7.54985e-07	1.81671e-05	1.30766e-05	1.5634	HES1/ACVR1/GATA4/CYR61/SUFU/ZFPM2/SMAD4/TGFBR2/NOTCH1/DNM2/BMPR2/MDM2/TGFBR1/NSD2/TGFBR3/SOX4/HEG1/LUZP1/WNT5A/FRS2/FGFR2/GATA3/AP2B1/SALL1/PTK7/DCTN5/LRP2/PRDM1/VANGL2/SMAD6/SOX11/NOG/FGFRL1/SMAD7/ZFPM1/HEY2/CITED2/PAX8/HEYL/NPRL3/NKX2-5/EGLN1/PITX2/FZD1/FZD2/TRIP11/TGFB2/DAND5/PROX1/SAV1/HEY1/TBX3/SALL4	53
GO:0019318	hexose metabolic process	biological process	158/9065	233/17381	7.59388e-07	1.8221e-05	1.31154e-05	1.30019	AKT2/SLC45A3/TPI1/OMA1/FOXO1/SLC25A1/GPD2/ADPGK/PKM/IGF1/PGM2/SERP1/G6PD/INPPL1/GALT/IRS1/CPT1A/PPARA/IGF2/HK2/SIRT1/IGFBP5/PMAIP1/AKT1/HMGB1/PHLDA2/SESN2/C1QTNF2/IL6/MIDN/PRKAA1/KAT2A/RGN/SLC25A10/B4GALT1/SRC/POFUT1/EPM2AIP1/GPI/DCXR/MTOR/MAN2C1/SLC35B4/GSK3A/ENO1/PFKP/GALM/NISCH/MAEA/AKR1B1/GAPDH/BRAT1/PDHA1/RANBP2/PPARGC1A/PPP1CB/PGAM1/USF1/SOGA1/ALDOA/PFKFB4/NCOA2/TIGAR/MDH2/SLC37A4/PPARD/ATF…	158
GO:0044766	multi-organism transport	biological process	59/9065	74/17381	7.7936e-07	1.85942e-05	1.3384e-05	1.52872	POM121/NDC1/XPO1/NUP58/KPNA2/TSG101/RAN/NUP62/IFIT1/NUP50/POM121C/NUP160/NUP210/KPNA5/RAB29/CAV1/UBA52/UBB/VPS37C/NUP153/KPNB1/RANBP2/NUP214/AAAS/NUP37/UBC/RAB7A/TCP1/VPS37B/TPR/NUPL2/THOC5/KPNA1/THOC1/NUP98/NUP43/VPS37A/FMR1/DDX39B/NUP205/NUP155/RPS27A/SEH1L/NUP54/NUP93/KPNA4/KPNA3/ALYREF/VPS37D/NUP188/MVB12B/RAB40B/CAV2/NUP85/CD209/THOC2/NUP35/NMT2/EPS15	59
GO:1902579	multi-organism localization	biological process	59/9065	74/17381	7.7936e-07	1.85942e-05	1.3384e-05	1.52872	POM121/NDC1/XPO1/NUP58/KPNA2/TSG101/RAN/NUP62/IFIT1/NUP50/POM121C/NUP160/NUP210/KPNA5/RAB29/CAV1/UBA52/UBB/VPS37C/NUP153/KPNB1/RANBP2/NUP214/AAAS/NUP37/UBC/RAB7A/TCP1/VPS37B/TPR/NUPL2/THOC5/KPNA1/THOC1/NUP98/NUP43/VPS37A/FMR1/DDX39B/NUP205/NUP155/RPS27A/SEH1L/NUP54/NUP93/KPNA4/KPNA3/ALYREF/VPS37D/NUP188/MVB12B/RAB40B/CAV2/NUP85/CD209/THOC2/NUP35/NMT2/EPS15	59
GO:0007249	I-kappaB kinase/NF-kappaB signaling	biological process	180/9065	270/17381	7.9031e-07	1.88022e-05	1.35337e-05	1.27825	IRAK2/PLK2/TLR2/FADD/ESR1/TRAF6/IRAK1/CARD8/ROCK1/PPM1A/HACD3/TMSB4X/GJA1/FAF1/PRKCE/IKBKB/APP/CYLD/NFKB1/HMOX1/UBE2I/CHUK/BMP7/SIRT1/TLR4/IKBKE/NFKBIA/PTGS2/MTDH/TBK1/AKT1/LPAR1/RHOA/VAPA/NFKB2/ECT2/NLRP3/BTRC/PELI2/TMEM9B/TRIM59/NUP62/C18orf32/STAT1/TRIM22/IFIT5/GSTP1/WLS/LGALS1/F2RL1/G3BP2/FLNA/CCDC22/RHOC/ANKRD17/RIPK2/MIER1/SLC20A1/ERC1/UBA52/UBB/NDFIP2/PDPK1/UBE2N/CTNNB1/BRD4/USP10/ASH1L/TF…	180
GO:0048736	appendage development	biological process	121/9065	172/17381	7.96756e-07	1.88491e-05	1.35675e-05	1.34885	CACNA1C/RARG/ITGB4/HAND2/HOXD10/CHST11/FGFR1/MED1/IFT52/LRP4/MEOX2/CREBBP/HOXA10/BMP7/SMAD4/SOX9/PTCH1/HDAC1/BCL2L11/FGF9/NOTCH1/RECK/BMPR2/RUNX2/NIPBL/BAX/LEF1/MYCN/SOX4/MBNL1/WNT5A/FGFR2/ITGA6/DKK1/HDAC2/GLI2/SLC39A3/RDH10/GNAS/HOXC11/PBX2/SKI/SALL1/CTNNB1/FBN2/TBX2/BMPR1A/ATRX/LNPK/ALDH1A2/MEGF8/KREMEN1/DYNC2H1/PITX1/HOXD13/SMOC1/RARB/FZD6/CHD7/SALL3/SOX11/NOG/ASPH/GLI3/OSR1/FMN1/HOXD9/PLXNA2/…	121
GO:0060173	limb development	biological process	121/9065	172/17381	7.96756e-07	1.88491e-05	1.35675e-05	1.34885	CACNA1C/RARG/ITGB4/HAND2/HOXD10/CHST11/FGFR1/MED1/IFT52/LRP4/MEOX2/CREBBP/HOXA10/BMP7/SMAD4/SOX9/PTCH1/HDAC1/BCL2L11/FGF9/NOTCH1/RECK/BMPR2/RUNX2/NIPBL/BAX/LEF1/MYCN/SOX4/MBNL1/WNT5A/FGFR2/ITGA6/DKK1/HDAC2/GLI2/SLC39A3/RDH10/GNAS/HOXC11/PBX2/SKI/SALL1/CTNNB1/FBN2/TBX2/BMPR1A/ATRX/LNPK/ALDH1A2/MEGF8/KREMEN1/DYNC2H1/PITX1/HOXD13/SMOC1/RARB/FZD6/CHD7/SALL3/SOX11/NOG/ASPH/GLI3/OSR1/FMN1/HOXD9/PLXNA2/…	121
GO:0022406	membrane docking	biological process	116/9065	164/17381	8.57499e-07	2.02293e-05	1.45609e-05	1.35619	ACTR1A/CENPJ/CEP63/ROCK1/SSNA1/TUBA1A/USO1/VPS45/VCAM1/ALMS1/MSN/MAPRE1/CFTR/CCP110/PCNT/CDK1/CEP41/VAMP8/HAUS8/CKAP5/RAB11A/RABEPK/RALB/SFI1/EXOC2/SYTL2/STXBP3/RAB10/TUBB/HSP90AA1/NDE1/PRKACA/STX16/DYNC1H1/PLK1/CEP57/RAB26/YWHAE/CEP152/STX7/TUBG1/CDK5RAP2/TCTN1/VPS18/RAB7A/VPS11/EXOC6B/TUBB4B/SCFD1/EZR/CEP192/RAB3IP/HAUS6/ICAM1/RAB8B/PAFAH1B1/VAMP3/CSNK1E/YWHAG/BLOC1S6/SNAP25/STXBP2/EXOC5/VPS33A…	116
GO:1990823	response to leukemia inhibitory factor	biological process	72/9065	94/17381	8.73166e-07	2.04841e-05	1.47443e-05	1.46863	RARG/GNPNAT1/RNF138/KLF4/HNRNPU/NFYB/CREB1/HK2/SIRT1/PAX6/SRSF7/SHMT1/MAT2A/PARP16/UBXN2A/JARID2/TLE4/SPRY2/B3GNT2/DTX1/NR5A2/PDCD10/CTBP2/SRM/EIF4A2/NCL/XBP1/PFKP/BCLAF1/RIF1/KDM3A/SLC25A5/RNMT/MPC1/XRCC5/MSC/PCOLCE2/GCLM/KLF5/ICAM1/FZD4/ARID5B/SNX10/TFRC/SMAD7/LRAT/TWISTNB/SOCS3/MRAS/KDM5B/SYNGR1/RFX2/SSTR1/PRDM5/TRIM25/PADI2/EPS8/CACYBP/ILDR1/PIGA/GFPT2/RPS16/VEGFC/BSPRY/SOX17/EED/MTF2/SPOCK2/…	72
GO:1990830	cellular response to leukemia inhibitory factor	biological process	72/9065	94/17381	8.73166e-07	2.04841e-05	1.47443e-05	1.46863	RARG/GNPNAT1/RNF138/KLF4/HNRNPU/NFYB/CREB1/HK2/SIRT1/PAX6/SRSF7/SHMT1/MAT2A/PARP16/UBXN2A/JARID2/TLE4/SPRY2/B3GNT2/DTX1/NR5A2/PDCD10/CTBP2/SRM/EIF4A2/NCL/XBP1/PFKP/BCLAF1/RIF1/KDM3A/SLC25A5/RNMT/MPC1/XRCC5/MSC/PCOLCE2/GCLM/KLF5/ICAM1/FZD4/ARID5B/SNX10/TFRC/SMAD7/LRAT/TWISTNB/SOCS3/MRAS/KDM5B/SYNGR1/RFX2/SSTR1/PRDM5/TRIM25/PADI2/EPS8/CACYBP/ILDR1/PIGA/GFPT2/RPS16/VEGFC/BSPRY/SOX17/EED/MTF2/SPOCK2/…	72
GO:0003205	cardiac chamber development	biological process	111/9065	156/17381	9.11539e-07	2.1325e-05	1.53496e-05	1.36429	MEF2C/HES1/ACVR1/GATA6/GATA4/TPM1/NRP1/NOTCH2/ARID1A/CYR61/HAND2/SUFU/MED1/ZFPM2/JAG1/BMP7/HIF1A/SRF/SMAD4/TGFBR2/TEK/NOTCH1/DNM2/BMPR2/MDM2/TGFBR1/NSD2/TGFBR3/NRP2/SOX4/HEG1/LUZP1/WNT5A/FRS2/FGFR2/PARVA/MYOCD/GATA3/HAND1/AP2B1/SALL1/TBX1/PKP2/GSK3A/TGFB1/TBX2/BMPR1A/PLXND1/FOXC1/NDST1/PTK7/SMO/DCTN5/DSP/MAML1/LRP2/RXRA/PRDM1/VANGL2/RARB/SMAD6/RBPJ/CHD7/SOX11/FKBP1A/NOG/FGFRL1/SMARCD3/SMAD7/ZFPM1…	111
GO:0050768	negative regulation of neurogenesis	biological process	166/9065	247/17381	9.71641e-07	2.26644e-05	1.63137e-05	1.2886	NTRK3/HES1/WNT3A/PLK2/NOTCH3/FOXO3/LRP1/NRP1/F2/GAK/ADCY6/PITX3/CERS2/INPP5F/MED1/APP/PTK2/LRP4/DPYSL3/ARHGDIA/SNAPIN/SOX2/JAG1/NF1/DICER1/ERBB4/BMP7/SOX9/TP73/NOTCH1/PAX6/STAT3/LDLR/MDM2/LPAR1/RHOA/DLX1/TERT/ZNF365/ASPM/MYCN/EPHA4/PTPRG/SPART/DDX6/RNF6/YWHAH/WNT5A/SPP1/BAG5/DTX1/LGALS1/CALR/HDAC2/RAPGEF2/EIF4E/THY1/BCL11A/RAB29/EPHA7/FKBP4/ARHGEF2/SKI/KCTD11/GSK3A/CTNNB1/TGFB1/CTNNA1/COL3A1/BMPR…	166
GO:0030307	positive regulation of cell growth	biological process	114/9065	161/17381	9.74177e-07	2.26644e-05	1.63137e-05	1.35764	NTRK3/S100A9/WNT3A/CDC42/BCL2/H3F3B/PAK1/NRP1/F2/EGFR/IGF1/SHTN1/BDNF/VEGFA/CPNE6/FN1/HPN/EDN1/TWF2/ERBB2/SRF/ILK/BMPR2/AKT1/CSNK2A1/TGFBR1/CXCL12/TAF9/DDX3X/LEF1/NDEL1/RAB11A/RIMS2/HIST1H1B/CDH4/H3F3C/EIF4G1/IST1/SEMA4D/KDM2B/SFN/L1CAM/IL2/ITSN2/MTOR/CXCL16/MAP1B/EIF4G2/BRAT1/MTPN/TRPC5/SYT4/RASAL1/CYFIP1/ZFYVE27/TAF9B/RPS6KA1/SLC25A33/MEGF8/SMURF1/DERL2/SLC9A1/GOLGA4/SUPV3L1/EXTL3/EXOSC2/SFRP1/…	114
GO:0060606	tube closure	biological process	68/9065	88/17381	9.89651e-07	2.2961e-05	1.65272e-05	1.48161	TRAF6/ZEB2/RARG/ARID1A/SUFU/SDC4/DVL2/PTCH1/SCRIB/PFN1/VASP/MTHFD1/TMED2/WNT5A/DLC1/KAT2A/FOLR1/KDM2B/PLXNB2/GLMN/MTHFD1L/SKI/PRKACA/DVL1/TSC2/TGFB1/TEAD2/TSC1/PTK7/SEMA4C/ABL1/SEC24B/RALA/LRP2/MED12/SFRP1/SETD2/VANGL2/FZD6/TRIM71/PRICKLE1/NOG/LRP6/ADM/BBS4/KDM6A/NPHP3/APAF1/TWIST1/RARA/PAX2/DVL3/ALX1/ARHGAP35/CC2D2A/PRKACB/FZD1/SPINT2/FZD2/SHROOM3/TGFB2/BCL10/LIAS/STIL/PHACTR4/TULP3/SALL4/GRHL2	68
GO:0071156	regulation of cell cycle arrest	biological process	84/9065	113/17381	1.03157e-06	2.38679e-05	1.718e-05	1.4253	GATA6/PLK2/CDK9/AKT2/CCND1/CDKN1A/E2F1/CENPJ/BRCA1/ATM/EP300/HMGA2/CNOT6/CDKN1B/TP53/TP73/MDM2/CDK4/BAX/GADD45A/HSP90AB1/CDK1/PCNA/SOX4/TNKS1BP1/CNOT4/ZNF385A/CALR/SFN/CCNB1/UBA52/UBB/PRKACA/CNOT1/MIF/TGFB1/E2F8/NPM1/CASP2/CNOT8/CNOT9/RPL26/MYBBP1A/SLC25A33/UBC/MED25/PRMT1/AURKA/FOXM1/CNOT6L/CDK2/E2F4/CNOT11/CARM1/BTG2/TFDP1/CCNK/RBL2/ARID3A/DAB2IP/MDM4/ZNF268/CDK5R1/TFDP2/ID2/CHEK2/MUC1/FOXO4/RR…	84
GO:0009314	response to radiation	biological process	277/9065	437/17381	1.042e-06	2.40432e-05	1.73061e-05	1.21536	DRD1/CDC25A/CCND2/KRAS/TP53INP1/AKT2/CCND1/CDKN1A/CHEK1/ANXA1/DNMT3A/BCL2/JUN/MSH2/RAD51C/DNMT3B/RHOB/GRB2/EGFR/BRCA2/BRCA1/CASP9/ATM/PIAS1/EP300/HMGA2/RAD51/PRIMPOL/MECP2/APP/VCAM1/HMGN1/RBM4/JUNB/CREBBP/CLOCK/NF1/HRAS/TP53/HIF1A/CREB1/SIRT1/N4BP1/PTGS2/TP73/MGMT/FOS/PTPRK/DNM2/AKT1/SNAI2/MDM2/CXCL12/MAPK8/NIPBL/BAX/GADD45A/ECT2/FANCG/DDB1/POLD1/PCLAF/MSH6/TICRR/PCNA/FANCD2/BLM/HMGCR/FEN1/CRY2/T…	277
GO:0035872	nucleotide-binding domain, leucine rich repeat containing receptor signaling pathway	biological process	34/9065	38/17381	1.05009e-06	2.41636e-05	1.73928e-05	1.71555	IRAK2/TRAF6/IRAK1/HSPA1A/IKBKB/CYLD/CHUK/TLR4/XIAP/NFKBIA/ERBIN/PTPN22/RIPK2/UBA52/UBB/HSPA1B/UBE2N/ITCH/UBC/TAB2/IKBKG/MAP3K7/UBE2V1/TNFAIP3/RPS27A/MAP2K6/TAB1/RELA/C1orf106/CASP8/RNF34/TAB3/NOD2/OTULIN	34
GO:0060537	muscle tissue development	biological process	248/9065	387/17381	1.09291e-06	2.50804e-05	1.80527e-05	1.22871	MEF2C/ACVR1/GATA6/WNT3A/CDC42/MEF2A/GATA4/HDAC4/BCL2/WT1/PAK1/TPM1/ARID2/ARID1A/FGF20/IGF1/GJA1/HOXD10/DDX5/G6PD/SOX6/EGR2/FGFR1/MED1/VEGFA/EP300/ERBB3/FGF2/PIM1/MEOX2/ZFPM2/HNRNPU/TSC22D3/EDN1/NF1/ERBB4/BMP7/SRF/SMAD4/SOX9/PDGFRA/CREB1/RB1/IGFBP5/SLC8A1/FGF9/TGFBR2/TP73/NOTCH1/FOS/TGFBR1/MYLK/LEF1/TGFBR3/SELENON/CDK1/SIX1/HMGCR/SIX4/PRKAA1/HEG1/JARID2/WNT5A/FRS2/KDM6B/FOXN2/FGFR2/ACTA1/CALR/DKK1…	248
GO:1902749	regulation of cell cycle G2/M phase transition	biological process	140/9065	204/17381	1.12438e-06	2.56947e-05	1.84949e-05	1.31585	CDC25A/CCND1/ACTR1A/CENPJ/CEP63/RAD51C/CDK6/SSNA1/TUBA1A/BRCA1/ATM/HMGA2/MECP2/APP/ALMS1/TP53/MAPRE1/CDK4/CCP110/PCNT/DONSON/FANCI/CDK1/CEP41/TICRR/HAUS8/BLM/PSMD9/CKAP5/RAB11A/RCC2/SIN3A/SFI1/MRE11/NOP53/CENPF/PSME1/CCNB1/CDC25B/TUBB/UBA52/PSMD3/HSP90AA1/UBB/NDE1/PSMB2/PRKACA/PSMD4/PSMD11/BRD4/DYNC1H1/VPS4A/SKP1/PSMC1/CTC1/PLK1/CEP57/NPM1/FOXN3/YWHAE/CEP152/PSMB3/PSMA7/ORAOV1/TAOK3/PSMC5/TPX2/TU…	140
GO:0048545	response to steroid hormone	biological process	252/9065	394/17381	1.12578e-06	2.56947e-05	1.84949e-05	1.22634	NTRK3/KRAS/TLR2/CCND1/CDKN1A/FOXO3/ESR1/ANXA1/BCL2/CCNE1/DNMT3B/PAK1/FOXP1/FOXO1/RARG/THBS1/EGFR/ARID1A/BRCA1/CASP9/DDX5/PIAS1/MED1/EP300/HNF4A/NR1I2/RXRB/MED16/COL1A1/PPARA/UBE2I/HNRNPU/CLOCK/EDN1/FAS/BMP7/PPARG/NRIP1/SIRT1/HDAC1/RB1/ERRFI1/IGFBP2/PTGS2/EGLN2/TGFBR2/KLF9/NOTCH1/CTGF/FOS/FLT3/SDC1/RBFOX2/MDM2/ADAM9/NR6A1/CREBRF/ZFP36L2/RBBP7/ATP1A1/HMGB1/LEF1/GJB2/TYMS/PCNA/KANK2/EPHX1/IL6/CRY2/N…	252
GO:0006612	protein targeting to membrane	biological process	115/9065	163/17381	1.17438e-06	2.6615e-05	1.91573e-05	1.35275	AKT2/PAK1/GOLGA7/KCNE1/ERBB2/PRNP/SEC61A1/ICMT/ARL6IP1/SEC61B/DMTN/SEC62/CCL2/VAMP7/SSR1/MIEF1/RPS8/RPS2/SRP68/UBA52/RPL36A/RPL29/RPL18A/RPL3/RPS6/RPL4/RPLP1/RPS14/RPL7A/RPL10/RPL18/RPL37/RPL13/RPS27/RPL8/RPS15A/RPS5/RPL10A/SRP9/RPS18/RPS10/SRPRA/RPS3A/RPS28/RPLP0/RPS4X/RPL9/RPL23A/RPL27A/RPS3/RPL26/RPL12/RPL22/SSR2/RPL31/RPL35A/TAOK2/RPS9/RPL34/RPS12/RPL15/TCAF1/RPL36/RPS21/RPL5/RPL32/RPS26/RPL1…	115
GO:0030516	regulation of axon extension	biological process	60/9065	76/17381	1.17558e-06	2.6615e-05	1.91573e-05	1.51372	NTRK3/WNT3A/RAB21/PAK1/NRP1/SHTN1/VEGFA/FN1/TWF2/SRF/ILK/DNM2/BMPR2/CXCL12/NDEL1/RNF6/RAB11A/WNT5A/PLXNA4/CDH4/CTTN/L1CAM/TTL/MAP1B/TRPC5/CYFIP1/ZFYVE27/WDR36/MEGF8/ABL1/GOLGA4/PLXNA1/NKX6-1/DPYSL2/APOE/PAFAH1B1/CDK5R1/GDI1/SEMA7A/LIMK1/PTPRS/PLXNA2/MAPT/SEMA5A/SEMA4F/DRAXIN/DISC1/NTN1/WNT3/RTN4R/SEMA3F/MAG/TRPV2/BARHL2/RTN4/ISLR2/PLXNA3/TNFRSF12A/SEMA3A/NRG1	60
GO:1903312	negative regulation of mRNA metabolic process	biological process	60/9065	76/17381	1.17558e-06	2.6615e-05	1.91573e-05	1.51372	CDK9/E2F1/PTBP1/HNRNPD/SRSF9/HNRNPU/TRA2B/SRSF7/BARD1/SRSF6/TARDBP/RBM42/SRSF4/DYRK1A/IGF2BP1/YBX1/DHX34/PAIP1/LARP1/SECISBP2/MTOR/HNRNPC/PABPC1/NELFE/U2AF2/RNPS1/NPM1/SUPT5H/YBX3/MAPKAPK2/HNRNPA0/SAP18/RNF40/C1QBP/TMBIM6/RBMX/HNRNPA2B1/HNRNPK/AXIN2/ELAVL1/TOB1/FMR1/BAG4/THRAP3/RNF20/BOLL/SYNCRIP/CCNT1/SLC11A1/SRSF10/MYD88/MAPK14/GDNF/ANGEL2/ZC3H14/PKP1/MEIOC/TIRAP/ZFP36/CELF4	60
GO:1902903	regulation of supramolecular fiber organization	biological process	200/9065	305/17381	1.18331e-06	2.67181e-05	1.92316e-05	1.25729	MEF2C/STMN1/MET/CDC42/HSPA1A/ROCK1/PAK1/GRB2/TPM1/NRP1/TMSB4X/SH3PXD2B/PLEKHG2/PREX1/SDC4/TAC1/PRKCE/MECP2/APP/ALMS1/CDKN1B/TWF1/EDN1/TWF2/SMAD4/CTGF/MAPRE1/LDLR/PFN1/WASF2/LPAR1/RHOA/TGFBR1/CXCL12/PSRC1/VASP/CDC42EP4/ABI2/NF2/SPIRE1/LIMA1/CLIP1/MID1IP1/CAPZB/PPP1R9A/DLC1/CAPZA1/ARPC5/DMTN/F2RL1/SYNPO2L/PHLDB2/CTTN/CAPG/TMOD3/PLEKHH2/FRMD7/TBCD/ARHGAP28/ARF1/FKBP4/CORO1B/ARHGEF2/MTOR/COLGALT1/HSP…	200
GO:0048048	embryonic eye morphogenesis	biological process	31/9065	34/17381	1.22747e-06	2.76411e-05	1.98959e-05	1.74819	RARG/ARID1A/ZEB1/BMP7/SP3/PAX6/FOXF2/WNT5A/FRS2/FBN1/KDM2B/AXIN1/HIPK2/FBN2/TBX2/HIPK1/RARB/SOX11/TH/FOXL2/IHH/FZD5/TWIST1/TFAP2A/SIX3/PAX2/MFAP2/WNT16/PHACTR4/ALDH1A3/PROX1	31
GO:0032606	type I interferon production	biological process	92/9065	126/17381	1.24346e-06	2.79264e-05	2.01013e-05	1.39999	TLR2/IRAK1/POLR2K/EP300/HSPD1/CYLD/NFKB1/CREBBP/CHUK/TLR4/IKBKE/TBK1/DDX3X/HMGB1/NFKB2/TAX1BP1/IRF7/STAT1/ISG15/NMI/MRE11/PTPN22/HERC5/PQBP1/RIPK2/UBA52/UBB/POLR2L/CTNNB1/RNF216/XRCC6/TICAM1/IFIH1/ITCH/UBC/YY1/POLR3H/SYK/XRCC5/NLRX1/CACTIN/POLR2F/LRRFIP1/MAVS/FLOT1/OTUD5/SETD2/PCBP2/IFNAR1/POLR1D/RIOK3/DDX58/PIN1/POLR3G/TLR7/TLR3/STAT6/PTPRS/ZBTB20/TNFAIP3/CRCP/HAVCR2/RPS27A/REL/TRAF3/TRIM25/TRIM…	92
GO:0000723	telomere maintenance	biological process	110/9065	155/17381	1.25578e-06	2.8128e-05	2.02464e-05	1.36072	PRIM1/RAD51C/CCNE1/CCNE2/POLA2/BRCA2/ATM/RAD51/HNRNPD/HNRNPU/MAPK3/MAPK1/RFC5/POLA1/EXO1/RFC4/HSP90AB1/TERT/ZNF365/RECQL4/POLD1/POLE/PCNA/POLE2/BLM/FEN1/DCLRE1B/CCT3/RPA2/TNKS1BP1/MRE11/RFC2/HIST3H3/HNRNPA1/SRC/MYC/HSP90AA1/TNKS/SLX4/HNRNPC/PTGES3/POLD3/CTNNB1/WRAP53/CCT5/NOP10/ATRX/SMG5/CTC1/HIST2H4B/RIF1/CCT7/HIST1H4E/ZBTB48/SMG1/NABP2/XRCC1/PARP1/XRCC6/EXOSC10/CCT4/CCT2/RFC1/DCLRE1C/CCT6A/NHP2…	110
GO:0001525	angiogenesis	biological process	295/9065	469/17381	1.2628e-06	2.82102e-05	2.03056e-05	1.20602	ACVR1/GATA6/CDC42/SPRED1/GATA4/NOTCH3/JUN/ROCK1/HOXA5/RHOB/THBS1/NRP1/ANXA2/ANPEP/TMEM2/CYR61/HAND2/BRCA1/HOXA7/NOTCH4/KLF4/FGFR1/MED1/VEGFA/HMGA2/MAPK7/ETS1/FN1/FGF2/PTK2/PRKD2/MEOX2/CXCL8/HMOX1/RNF213/EDN1/JAG1/NF1/ERBB2/HIF1A/PPARG/SRF/PDGFRA/SERPINE1/SIRT1/FLT1/KDR/EGFL7/PTGS2/FGF9/PIK3CG/TGFBR2/MTDH/TEK/NOTCH1/CTGF/STAT3/WASF2/EDNRA/RHOA/TGFBR1/HMGB1/VAV3/LEF1/TERT/EPHA2/ATP5B/APOLD1/C5/CLIC…	295
GO:0048704	embryonic skeletal system morphogenesis	biological process	71/9065	93/17381	1.29366e-06	2.88234e-05	2.07469e-05	1.4638	MEF2C/HOXA5/HOXD10/HOXB8/ZEB1/CHST11/HOXA7/HOXB7/WNT9B/BMP7/PDGFRA/TGFBR2/RUNX2/SMAD2/TGFBR1/NIPBL/SIX1/MTHFD1/MYCN/WDR60/HOXA3/SIX4/HOXB5/FGFR2/SLC39A3/RDH10/AXIN1/GNAS/HOXC11/SATB2/MTHFD1L/TBX1/CTNNB1/NDST1/SMAD3/MEGF8/DLX2/EIF4A3/MED12/SETD2/NODAL/SOX11/NOG/MMP14/GLI3/OSR1/MYF5/HOXD9/HOXA1/TWIST1/TFAP2A/PAX5/HOXD3/FLVCR1/HOXB3/HOXB6/SHOX2/PCGF2/HOXA11/ALX1/PRRX1/IFT140/HOXD4/WNT9A/SLC39A1/DLG1…	71
GO:0007160	cell-matrix adhesion	biological process	141/9065	206/17381	1.30347e-06	2.88988e-05	2.08012e-05	1.31238	BCL2/CDK6/ROCK1/THBS1/NRP1/ITGB4/CORO1C/UTRN/SDC4/HOXA7/VEGFA/FN1/PTK2/VCAM1/PLAU/CSF1/DDR1/FERMT2/NF1/MUC4/SRF/SERPINE1/BCL2L11/CDKN2A/KDR/ILK/FBLN5/CD44/TEK/CTGF/PTPRK/ADAM9/RHOA/LIMS1/ACTN1/EPDR1/NF2/DLC1/ITGB2/RCC2/CD63/DMTN/ITGA6/PHLDB2/CTTN/ITGA1/ITGA3/CDH13/L1CAM/THY1/SRC/ITGAV/ITGB1/VCL/MKLN1/MINK1/PDPK1/TIAM1/CTNNB1/PIP5K1A/COL3A1/PARVG/NID2/ZYX/TSC1/SMAD3/PTEN/IQGAP1/PPFIA1/TAOK2/SLC9A1…	141
GO:0006457	protein folding	biological process	156/9065	231/17381	1.3077e-06	2.88988e-05	2.08012e-05	1.29485	ATF6/HSPA1A/PPIB/GAK/DNAJB1/HSP90B1/HSPD1/TMX1/CSNK2A1/HSP90AB1/NPPC/PFDN2/CDC37/CCT3/GNB5/PDRG1/FYCO1/GNAI1/MESD/BAG5/CALR/GNAI2/UGGT2/MPDU1/PFDN1/PDIA3/GNB2/PPIA/GNAI3/GNB1/DNAJC10/UNC45A/GNAT2/UGGT1/TBCD/CSNK2A2/DNAJB4/DFFA/PDIA6/UBA52/HSP90AA1/UBB/FKBP4/PTGES3/HSPA1B/TOR2A/ERP29/HSPA8/CCT5/PSMC1/EMC1/CDC37L1/P3H1/RANBP2/FKBP8/CCT7/DNAJA3/PRKCSH/PPIL1/SNRNP70/DNAJA1/EMC6/CCT4/CCT2/HSPH1/TRAP1/…	156
GO:0097485	neuron projection guidance	biological process	156/9065	231/17381	1.3077e-06	2.88988e-05	2.08012e-05	1.29485	CXCR4/TUBB3/WNT3A/KRAS/GRB2/PDLIM7/NRP1/BDNF/EGR2/VEGFA/MAPK7/APP/PTK2/RPS6KA5/HRAS/ERBB2/BMP7/SIAH1/SMAD4/MAPK3/CREB1/PTCH1/MAPK1/ARTN/NCAM1/PAX6/BMPR2/CXCL12/VASP/NRP2/EPHA4/NFIB/VLDLR/GRB10/SHC1/BCL11B/WNT5A/FRS2/B3GNT2/USP33/KIF5B/PLXNA4/CDH4/LHX4/TUBB2B/GPC1/DOK6/GLI2/GATA3/L1CAM/SRC/NR4A3/EPHA7/DVL1/ROBO2/DPYSL5/PTPN11/DOK4/SLIT1/EFNB1/UNC5B/GAB1/ENAH/DOK2/PRKCA/SPTBN1/MEGF8/SPTBN2/APBB2/SP…	156
GO:0071103	DNA conformation change	biological process	191/9065	290/17381	1.31077e-06	2.88988e-05	2.08012e-05	1.26282	ANXA1/GTF2H1/H3F3B/SET/ANP32B/HIST1H3B/HMGA2/RAD51/TSPYL1/TSPYL2/TP53/SOX9/CDKN2A/HMGA1/PURA/MIS18BP1/DDX3X/RBBP7/OIP5/NCAPH2/CENPU/HMGB1/HELLS/NCAPG/NCAPH/CHAF1B/GINS2/DDB1/RECQL4/CDK1/CENPQ/ASF1B/CHD4/TOP2A/CDCA5/NCAPD2/MCM5/MCM7/HIST1H1D/BLM/RSF1/MCM6/MCM4/HHEX/BAHD1/ASF1A/GINS1/TSPYL4/CUL4B/HIST2H3A/H1FX/HIST1H1B/MRE11/SMARCA1/NCAPD3/H3F3C/MCM2/SMC4/HIST2H3D/NOC2L/HIST2H3C/HIST3H3/HP1BP3/ANP3…	191
GO:0031397	negative regulation of protein ubiquitination	biological process	100/9065	139/17381	1.37392e-06	3.02119e-05	2.17464e-05	1.37941	HSPA1A/SUFU/PRKCE/ANAPC16/N4BP1/OTUB1/UBE2C/CDC20/BUB1B/CDK1/FBXO5/SOX4/SPOPL/PSMD9/ISG15/BAG5/MAD2L1/NXN/PSME1/UBR5/CCNB1/GLMN/CAV1/UBA52/PSMD3/UBB/PSMB2/MTOR/ANAPC1/HSPA1B/PSMD4/FZR1/PSMD11/U2AF2/PSMC1/GTPBP4/PARP10/PSMB3/PSMA7/PARK7/RPS3/DNAJA1/PSMC5/TRIP12/PSMD2/UBC/PSMD6/PSMC4/PSMD1/PSME3/PSMD7/PINX1/ABL1/UBXN1/RPL5/RPS7/PSMA2/ARRB1/PSMD8/PSMD13/CDK2/PSMC3/PRMT3/WNT1/HFE/OGT/UBE2D1/GNL3L/BUB…	100
GO:0030901	midbrain development	biological process	69/9065	90/17381	1.38677e-06	3.04151e-05	2.18926e-05	1.46999	HES1/WNT3A/CDC42/YWHAQ/PITX3/G6PD/FGFR1/WNT9B/FGF9/RHOA/BASP1/UQCRQ/YWHAH/WNT5A/ZNF148/FGFR2/WLS/DKK1/KAT2A/KDM2B/SEC16A/ACTB/COX6B1/EN2/CKB/CTNNB1/YWHAE/NDST1/GLUD1/CNP/ATP5J/ZNF430/NR4A2/SUDS3/GDF7/SFRP1/HSPA5/SMAD1/WNT1/FZD6/CSNK1E/LRP6/WNT2/CASP5/UCHL5/WNT3/DLG5/DYNLL1/BARHL1/EN1/PADI2/PHOX2A/MAOB/OTX1/PLP1/FZD1/SHH/CCDC14/LMX1A/SMAD9/RYK/TAF1/GNB4/SOS1/TAL2/OTX2/NDRG2/CSNK1D/MSX1	69
GO:0051236	establishment of RNA localization	biological process	136/9065	198/17381	1.47685e-06	3.23066e-05	2.32541e-05	1.31698	POM121/ATM/SRSF11/CPSF1/SRSF9/SRSF1/SRSF7/DDX39A/NDC1/POLR2D/XPO1/NUP58/NMD3/RBM8A/HHEX/WDR33/GLE1/CKAP5/SRSF2/RAN/SRSF3/NUP62/SRSF6/MX2/SRRM1/SYMPK/CPSF3/SLBP/G3BP2/SRSF4/ZC3H11A/NUP50/NOP53/NXT2/POM121C/HNRNPA1L2/EIF4E/NUP160/NUP210/XPOT/SRSF5/HNRNPA1/HNRNPA3/IGF2BP3/IGF2BP1/TNKS/NUP153/RANBP3/U2AF2/RNPS1/SMG5/IGF2BP2/NCBP2/RANBP2/NPM1/XPO7/SMG1/XPO5/PABPN1/NUTF2/NUP214/CASC3/AAAS/TSC1/NUP37/BI…	136
GO:0051648	vesicle localization	biological process	176/9065	265/17381	1.51227e-06	3.29957e-05	2.37501e-05	1.27343	WNT3A/KIF23/SEC23IP/GAK/CTSC/AP3D1/AP3B1/TRAPPC3/USO1/P2RX7/SNAPIN/SCRIB/PIK3CG/RAP1A/RAB5A/DNM2/LRRK2/SEC31A/GBF1/TMED2/SEC23A/NDEL1/RAB1B/ANKFY1/PPP6R3/SYBU/MREG/ARHGAP1/FYCO1/TRAPPC10/RIMS3/RAB11A/RIMS4/SYT12/STON2/MOBP/RIMS2/RAP1B/KIF5B/MYO1A/ACTN4/RAB27B/TRIM9/FOLR1/SEC16A/VAMP7/MAP4K2/CDH2/SYT9/ARF1/SH3GL1/PEF1/NDE1/BRAF/BET1/CTNNB1/DYNC1H1/SYT4/MCFD2/HTT/FCHO2/NSF/TFG/CYFIP1/AP3M2/PIP5K1C/…	176
GO:0007015	actin filament organization	biological process	227/9065	352/17381	1.55146e-06	3.37633e-05	2.43026e-05	1.23649	STMN1/MET/CDC42/BCL2/ROCK1/PAK1/GRB2/TPM3/TPM2/TPM1/NRP1/TMSB4X/SH3PXD2B/PLEKHG2/SHTN1/TPM4/PREX1/SDC4/CAP1/TAC1/INPPL1/FSCN1/PRKCE/WIPF1/HSP90B1/ALMS1/DPYSL3/WASF3/TWF1/TWF2/SRF/CTGF/PFN1/WASF2/LPAR1/RHOA/TGFBR1/CXCL12/ACTN1/VASP/CDC42EP4/ABI2/RFLNB/RAC2/NF2/SPIRE1/ARHGAP12/LIMA1/CAPZB/PPP1R9A/CD2AP/DLC1/CAPZA1/ARPC5/ACTA1/DMTN/PLS3/MYO1B/F2RL1/ACTN4/SYNPO2L/PLS1/FLNA/PHLDB2/MARCKS/ACTC1/ERMN/LC…	227
GO:0009126	purine nucleoside monophosphate metabolic process	biological process	203/9065	311/17381	1.59842e-06	3.46957e-05	2.49737e-05	1.25153	HDAC4/TPI1/HSPA1A/MSH2/ATP6V0A1/ADPGK/PKM/IGF1/TMSB4X/PRPS1/POM121/ATP6V1B2/MECP2/P2RX7/PPARA/HIF1A/HK2/SCRIB/STAT3/NDC1/NUP58/HPRT1/CDK1/ATP5B/TJP2/UQCRQ/COX10/PRKAA1/NUP62/NUP50/PDE12/ATP6V1A/POM121C/PRKAG1/NUP160/NDUFS4/NUP210/NT5E/IMPDH1/CCNB1/CYCS/LDHA/COX6B1/UQCRC1/AMPD2/SDHA/GPI/GART/NUP153/ATP5G3/HSPA1B/NDUFB10/ATP5S/TGFB1/ENO1/PFKP/NDUFS7/HSPA8/GAPDH/OGDHL/PFAS/RANBP2/PPARGC1A/PGAM1/ALDO…	203
GO:0016241	regulation of macroautophagy	biological process	114/9065	162/17381	1.60443e-06	3.47366e-05	2.50032e-05	1.34926	SNX6/ATP6V0A1/ATP6V1B2/HMOX1/HIF1A/MAPK3/UVRAG/SIRT1/KDR/TBK1/RB1CC1/RAB5A/AKT1/LRRK2/MAPK8/PIP4K2C/SESN2/CDC37/SMCR8/RAB1B/PRKAA1/ATP6V1C1/RNF41/RAB12/FYCO1/PIP4K2B/CAPN1/RALB/ATP6V1A/PRKAG1/MFN2/GNAI3/ATP6V1E1/RIPK2/RHEB/LARP1/PIKFYVE/CAPNS1/UBQLN4/MTOR/PRKACA/HTRA2/TSC2/GAPDH/HTT/ATP6V0C/PHF23/SUPT5H/TIGAR/ATP13A2/TSC1/UBQLN2/UCHL1/PIP4K2A/SMURF1/LAMTOR4/SCOC/CLEC16A/EXOC7/VPS35/SCFD1/PRKAB2/V…	114
GO:0097345	mitochondrial outer membrane permeabilization	biological process	45/9065	54/17381	1.61752e-06	3.49301e-05	2.51425e-05	1.59781	E2F1/BCL2/HSPA1A/RHOT1/YWHAQ/TP53/BCL2L11/TP73/YWHAZ/PMAIP1/MAPK8/BAX/DYNLL2/YWHAH/SFN/TMEM14A/RHOT2/NMT1/GSK3A/PPP3R1/PPP1R13B/YWHAE/SLC25A5/RTL10/ATPIF1/BOK/YWHAB/ACAA2/GSK3B/TFDP1/YWHAG/TFDP2/SLC35F6/BMF/HIP1R/MUL1/BLOC1S2/DYNLL1/BAK1/FZD9/MOAP1/BID/TP63/MPV17L/CASP8	45
GO:0044774	mitotic DNA integrity checkpoint	biological process	81/9065	109/17381	1.63912e-06	3.5306e-05	2.5413e-05	1.42484	PLK2/CCND1/CDKN1A/E2F1/CENPJ/MSH2/ATM/EP300/HMGA2/CNOT6/CDKN1B/TP53/TP73/MDM2/BAX/GADD45A/DONSON/FANCI/CDK1/TOP2A/TICRR/PCNA/BLM/SOX4/RPA2/TNKS1BP1/CNOT4/ZNF385A/MDC1/MRE11/NOP53/SFN/CCNB1/RAD9A/UBA52/UBB/CNOT1/GIGYF2/E2F8/NPM1/CASP2/FBXO31/FOXN3/ORAOV1/CNOT8/CNOT9/TAOK3/RPL26/UBC/PRMT1/AURKA/CNOT6L/CDK2/E2F4/CNOT11/ATF2/CARM1/BTG2/TFDP1/RBL2/ARID3A/MDM4/TFDP2/SYF2/RAD17/CHEK2/MUC1/FOXO4/TIPIN/RP…	81
GO:0046890	regulation of lipid biosynthetic process	biological process	117/9065	167/17381	1.68217e-06	3.6141e-05	2.60141e-05	1.34331	ANXA1/SLC45A3/CREBL2/SOD1/CYR61/BRCA1/FBXW7/NFKB1/NFYB/CREB1/SIRT1/PTGS2/IFNG/LDLR/AKT1/FABP3/SNAI2/CDK4/ATP1A1/IDI1/TM7SF2/LPCAT1/HMGCR/LPGAT1/PRKAA1/MID1IP1/STK11/RAN/HMGCS1/SF1/NFYA/ACADVL/IGFBP7/RGN/ORMDL2/CTDNEP1/SP1/SCARB1/FDFT1/RACK1/SREBF1/MTOR/KPNB1/FASN/SCD/PPARGC1A/DDX20/ACACA/INSIG1/MBTPS1/SREBF2/PRKAB2/SERPINA12/GGPS1/PRKAA2/ERLIN1/LSS/WDTC1/ADIPOR1/SIK1/DHCR7/APOE/NR1H3/TNF/SC5D/ADI…	117
GO:0050657	nucleic acid transport	biological process	134/9065	195/17381	1.69245e-06	3.61771e-05	2.60401e-05	1.31758	POM121/SRSF11/CPSF1/SRSF9/SRSF1/SRSF7/DDX39A/NDC1/POLR2D/XPO1/NUP58/NMD3/RBM8A/HHEX/WDR33/GLE1/CKAP5/SRSF2/RAN/SRSF3/NUP62/SRSF6/MX2/SRRM1/SYMPK/CPSF3/SLBP/G3BP2/SRSF4/ZC3H11A/NUP50/NOP53/NXT2/POM121C/HNRNPA1L2/EIF4E/NUP160/NUP210/XPOT/SRSF5/HNRNPA1/HNRNPA3/IGF2BP3/IGF2BP1/TNKS/NUP153/RANBP3/U2AF2/RNPS1/SMG5/IGF2BP2/NCBP2/RANBP2/NPM1/XPO7/SMG1/XPO5/PABPN1/NUTF2/NUP214/CASC3/AAAS/TSC1/NUP37/BICD2/…	134
GO:0050658	RNA transport	biological process	134/9065	195/17381	1.69245e-06	3.61771e-05	2.60401e-05	1.31758	POM121/SRSF11/CPSF1/SRSF9/SRSF1/SRSF7/DDX39A/NDC1/POLR2D/XPO1/NUP58/NMD3/RBM8A/HHEX/WDR33/GLE1/CKAP5/SRSF2/RAN/SRSF3/NUP62/SRSF6/MX2/SRRM1/SYMPK/CPSF3/SLBP/G3BP2/SRSF4/ZC3H11A/NUP50/NOP53/NXT2/POM121C/HNRNPA1L2/EIF4E/NUP160/NUP210/XPOT/SRSF5/HNRNPA1/HNRNPA3/IGF2BP3/IGF2BP1/TNKS/NUP153/RANBP3/U2AF2/RNPS1/SMG5/IGF2BP2/NCBP2/RANBP2/NPM1/XPO7/SMG1/XPO5/PABPN1/NUTF2/NUP214/CASC3/AAAS/TSC1/NUP37/BICD2/…	134
GO:0070507	regulation of microtubule cytoskeleton organization	biological process	109/9065	154/17381	1.72566e-06	3.67007e-05	2.6417e-05	1.3571	STMN1/MET/WNT3A/PLK2/CCNF/CHEK1/CENPJ/HSPA1A/PDCD6IP/PAK1/BRCA1/CCSAP/MECP2/CYLD/CDKN1B/HNRNPU/MAPRE1/RASSF1/XPO1/PSRC1/SKA1/KIF11/BORA/TACC3/CLIP1/MID1IP1/GNAI1/NUP62/PHLDB2/CLTC/CHMP2A/TBCD/CEP120/SMC3/FKBP4/ARHGEF2/HSPA1B/CTNNB1/SMC1A/DYNC1H1/RANBP3/MID1/PLK1/RANBP2/NPM1/CAMSAP1/RBM14/RPS3/STAG2/SKA3/TPX2/BICD2/CDK5RAP2/ABL1/TPR/TRIM37/AURKA/CAMSAP3/APC/BICD1/STMN3/RASSF7/GSK3B/RAC1/ROCK2/NUBP…	109
GO:2001236	regulation of extrinsic apoptotic signaling pathway	biological process	109/9065	154/17381	1.72566e-06	3.67007e-05	2.6417e-05	1.3571	ACVR1/FADD/BCL2/HSPA1A/MCL1/THBS1/NRP1/IGF1/BRCA1/TIMP3/FGFR1/FAF1/MAPK7/CYLD/PEA15/HMOX1/NF1/FAS/SERPINE1/PMAIP1/RB1CC1/AKT1/SNAI2/TGFBR1/BAX/STRADB/TERT/TMC8/GSTP1/ITGA6/PDIA3/CTTN/SRC/ITGAV/CAV1/PHIP/ARHGEF2/HSPA1B/HTRA2/LGALS3/CTNNA1/HTT/UNC5B/GPX1/PARK7/TMBIM1/PAK2/PTEN/TNFRSF10B/PSME3/ATF3/FEM1B/RAF1/INHBA/GCLM/BCL2L1/SFRP1/STK3/RFFL/AR/ICAM1/TNF/ZMYND11/RPS6KB1/STK4/SP100/SKIL/TCF7L2/PPP2R…	109
GO:0032479	regulation of type I interferon production	biological process	91/9065	125/17381	1.75748e-06	3.72833e-05	2.68363e-05	1.39585	TLR2/IRAK1/POLR2K/EP300/HSPD1/CYLD/NFKB1/CREBBP/CHUK/TLR4/IKBKE/TBK1/DDX3X/HMGB1/NFKB2/TAX1BP1/IRF7/STAT1/ISG15/NMI/MRE11/PTPN22/HERC5/PQBP1/RIPK2/UBA52/UBB/POLR2L/CTNNB1/RNF216/XRCC6/TICAM1/IFIH1/ITCH/UBC/YY1/POLR3H/SYK/XRCC5/NLRX1/CACTIN/POLR2F/LRRFIP1/MAVS/FLOT1/OTUD5/SETD2/PCBP2/IFNAR1/POLR1D/RIOK3/DDX58/PIN1/POLR3G/TLR7/TLR3/STAT6/PTPRS/ZBTB20/TNFAIP3/CRCP/HAVCR2/RPS27A/REL/TRAF3/TRIM25/TRIM…	91
GO:0000226	microtubule cytoskeleton organization	biological process	296/9065	472/17381	1.7631e-06	3.73086e-05	2.68545e-05	1.20242	STMN1/MET/WNT3A/PLK2/CCNF/CDC14A/CHEK1/KIF23/WEE1/CDC14B/CENPJ/CEP63/HSPA1A/PDCD6IP/PAK1/SLC16A1/TTK/BRCA2/BRCA1/CCSAP/KIF2A/MECP2/PTK2/CYLD/CDKN1B/HNRNPU/UVRAG/PAX6/MAPRE1/RHOA/RASSF1/GADD45A/SGO1/SYNE2/CCP110/PCNT/XPO1/RACGAP1/PSRC1/NDC80/SKA1/AUNIP/KIF11/SSX2IP/CDC20/CDK1/PCLAF/ASPM/WDR62/FBXO5/RCC1/BORA/HAUS8/MAP7D3/SPC25/TACC3/TACC1/TUBA1B/ESPL1/SPIRE1/KATNAL1/SUN2/NIN/NDEL1/MAP7/CLIP1/SON/M…	296
GO:0045927	positive regulation of growth	biological process	171/9065	257/17381	1.77948e-06	3.75172e-05	2.70047e-05	1.27576	NTRK3/MEF2C/S100A9/GATA6/WNT3A/CDC42/BCL2/WT1/H3F3B/PAK1/PPIB/NRP1/F2/EGFR/AGRN/IGF1/SH3PXD2B/SHTN1/SERP1/BDNF/FGFR1/VEGFA/CPNE6/FN1/FGF2/AGR2/HPN/PIM1/CSF1/ZFPM2/EDN1/TWF2/ERBB2/ERBB4/SRF/CREB1/ILK/FGF9/TGFBR2/NOTCH1/BMPR2/AKT1/CSNK2A1/TGFBR1/CXCL12/TAF9/DDX3X/NIPBL/BASP1/LEF1/TGFBR3/CDK1/NDEL1/RAB11A/FGFR2/RIMS2/HIST1H1B/CDH4/H3F3C/EIF4G1/PLS1/IST1/SEMA4D/KDM2B/SFN/L1CAM/CCNB1/IL2/ITSN2/MTOR/CX…	171
GO:0032147	activation of protein kinase activity	biological process	211/9065	325/17381	1.78187e-06	3.75172e-05	2.70047e-05	1.24482	CXCR4/NTRK3/IRAK2/TRAF6/IRAK1/PAK1/SOD1/MAP3K8/THBS1/HACD3/IQGAP3/EGFR/IGF1/ADCY6/CRK/MAP2K1/VEGFA/FGF2/NEK4/PRKAR2A/P2RX7/PEA15/CD40LG/MAP3K11/CRKL/MAPK3/ACVR2B/MAPK1/TLR4/TGFBR2/TP73/RAP1A/NTF3/AKT1/LRRK2/ADAM9/LPAR1/TGFBR1/GADD45A/STRADB/HMGB1/ADCY9/ECT2/PRNP/CDK1/C1QTNF2/C5/PRKAA1/STK11/SHC1/WNT5A/MAP3K21/FRS2/KIT/STK24/GNAI2/ITGA1/PTPN1/RIPK2/MAP4K2/SRC/PRR5/AXIN1/UBA52/UBB/DUSP7/MINK1/PDPK1…	211
GO:0031076	embryonic camera-type eye development	biological process	33/9065	37/17381	1.81119e-06	3.79449e-05	2.73125e-05	1.71009	RARG/ARID1A/ZEB1/BMP7/SP3/PAX6/FOXF2/WNT5A/FRS2/KDM2B/RDH10/HIPK2/TBX2/ALDH1A2/HIPK1/SOX11/TH/IHH/FZD5/TWIST1/TFAP2A/RARA/SIX3/PAX2/TRAF3IP1/PITX2/IFT140/WNT16/PHACTR4/ALDH1A3/PROX1/PPP1R13L/TULP3	33
GO:0070423	nucleotide-binding oligomerization domain containing signaling pathway	biological process	33/9065	37/17381	1.81119e-06	3.79449e-05	2.73125e-05	1.71009	IRAK2/TRAF6/IRAK1/HSPA1A/IKBKB/CYLD/CHUK/TLR4/XIAP/NFKBIA/ERBIN/PTPN22/RIPK2/UBA52/UBB/HSPA1B/UBE2N/ITCH/UBC/TAB2/IKBKG/MAP3K7/UBE2V1/TNFAIP3/RPS27A/MAP2K6/TAB1/RELA/C1orf106/CASP8/TAB3/NOD2/OTULIN	33
GO:0048645	animal organ formation	biological process	49/9065	60/17381	1.81862e-06	3.80059e-05	2.73564e-05	1.56586	MEF2C/HES1/GATA6/WNT3A/WT1/HAND2/MAP2K1/FGFR1/PIM1/BMP7/MAPK3/MAPK1/TGFBR2/SIX1/HOXA3/HHEX/WNT5A/FRS2/FGFR2/GNG5/DKK1/GLI2/FOLR1/RDH10/HOXC11/CTNNB1/BMPR1A/SPRY1/LRP2/AXIN2/AR/RBPJ/NOG/SMARCD3/WNT2B/WNT2/GLI3/CITED2/PAX8/PAX2/HOXA11/FOXH1/GDNF/SHH/TBR1/LEMD2/TP63/SOX17/FGF1	49
GO:0018209	peptidyl-serine modification	biological process	201/9065	308/17381	1.83443e-06	3.82414e-05	2.7526e-05	1.25127	DRD1/NTRK3/NLK/WNT3A/CDC42/PLK2/AKT2/BCL2/CREBL2/PAK1/PWP1/EGFR/TTK/INPP5F/UHMK1/ATM/AKT3/VEGFA/PRKCE/HMGA2/MAPK7/IKBKB/HPF1/APP/PRKD2/LIF/RPS6KA5/CHUK/IL24/MAPK3/MAPK1/NTRK2/IKBKE/ILK/PTGS2/CD44/TGFBR2/IFNG/TBK1/NTF3/AKT1/LRRK2/TGFBR1/MAPK8/BAX/CDK1/PKN3/IL6/TNKS1BP1/CSNK1G1/PRKAA1/STK11/RASSF2/WNT5A/CSNK1A1/FNIP1/SPRY2/DMTN/SGK3/ATP2B4/DKK1/IL11/EIF4G1/PDCD10/PRKG2/HIPK3/MAST4/CAMK2G/RIPK2/CCNB…	201
GO:0044783	G1 DNA damage checkpoint	biological process	57/9065	72/17381	1.84489e-06	3.83647e-05	2.76147e-05	1.51792	PLK2/CCND1/CDKN1A/E2F1/CENPJ/ATM/EP300/CNOT6/CDKN1B/TP53/TP73/MDM2/BAX/GADD45A/CDK1/PCNA/SOX4/RPA2/TNKS1BP1/CNOT4/ZNF385A/SFN/CCNB1/UBA52/UBB/CNOT1/GIGYF2/E2F8/NPM1/CASP2/FBXO31/CNOT8/CNOT9/RPL26/UBC/PRMT1/AURKA/CNOT6L/CDK2/E2F4/CNOT11/CARM1/WAC/BTG2/TFDP1/RBL2/ARID3A/MDM4/TFDP2/CHEK2/MUC1/RPS27A/E2F7/CNOT2/CRADD/TRIAP1/TP63	57
GO:0045785	positive regulation of cell adhesion	biological process	251/9065	394/17381	1.86989e-06	3.87887e-05	2.79198e-05	1.22147	HES1/WNT3A/MYB/HLA-G/CDC42/FADD/ANXA1/TRAF6/CDK6/ROCK1/PAK1/MAP3K8/GRB2/TPM1/NRP1/AP3D1/AP3B1/CYR61/UTRN/IGF1/EPB41L4B/FBLN2/PREX1/SDC4/CRK/VEGFA/PRKCE/PNP/ETS1/FN1/CSK/HSPD1/VCAM1/AGR2/PRKD2/CYLD/CSF1/SOX2/CD40LG/IGF2/ERBB2/BMP7/CRKL/PIEZO1/KDR/IGFBP2/ILK/CD44/PODXL/TGFBR2/TEK/IFNG/DNM2/AKT1/ADAM9/PDPN/CXCL12/LIMS1/CD46/HMGB1/VAV3/NLRP3/IL6/YES1/WNT5A/NKAP/CD80/DMTN/ITGA6/FLOT2/UNC13D/LGALS1/CAL…	251
GO:0001738	morphogenesis of a polarized epithelium	biological process	99/9065	138/17381	1.9137e-06	3.95999e-05	2.85038e-05	1.37551	CDC42/WNT9B/DVL2/MSN/GPC4/PFN1/FOXF2/RHOA/PSMD9/WNT5A/AP2S1/DKK1/CLTC/PSME1/RAB10/UBA52/PSMD3/UBB/AP2B1/PSMB2/AP2A2/TIAM1/DVL1/PSMD4/PSMD11/PSMC1/PSMB3/PSMA7/PSMC5/PTK7/SMURF1/AP2A1/PSMD2/UBC/PSMD6/PSMC4/PSMD1/PSME3/PSMD7/ABL1/VANGL1/SEC24B/CAMSAP3/PSMA2/DLG3/PSMD8/PSMD13/PSMC3/MED12/SFRP1/WNT1/RAC1/NUMB/FZD4/VANGL2/PAFAH1B1/ZNRF3/FZD6/PRICKLE1/CELSR3/FZD7/TCF15/PSMA5/FZD5/NPHP3/SMURF2/WDR1/PSMA1…	99
GO:0070585	protein localization to mitochondrion	biological process	132/9065	192/17381	1.93941e-06	4.00336e-05	2.88159e-05	1.31819	HES1/E2F1/BAP1/BCL2/YWHAQ/HPS4/MTX1/FBXW7/HSPD1/HSPA4/TP53/HK2/BCL2L11/TP73/YWHAZ/PMAIP1/AKT1/LRRK2/MAPK8/BAX/STARD7/HHAT/TIMM50/FAM20B/RAC2/DYNLL2/YWHAH/NKAP/KAT2A/MFN2/SFN/CSNK2A2/TIMM23/HSP90AA1/WDR46/SREBF1/NMT1/HTRA2/GSK3A/U2AF2/PPP3R1/USP36/MYBPC1/HUWE1/PPP1R13B/SLC25A6/YWHAE/DNAJA1/HSPH1/TOMM5/HSPA1L/RUVBL1/TOMM40/SAE1/ATPIF1/TOMM20/VPS11/HAX1/SREBF2/ARIH2/TOMM70/YWHAB/PDCD5/PSMD8/HK1/PARL…	132
GO:0071229	cellular response to acid chemical	biological process	135/9065	197/17381	1.96495e-06	4.04081e-05	2.90855e-05	1.31394	DNMT1/NTRK3/WNT3A/MYB/E2F1/DNMT3A/RARG/EGFR/ADCY6/ZEB1/KLF4/PRKCE/HNRNPD/COL1A1/CPT1A/WNT9B/EDN1/TWF2/PPARG/SOX9/PDGFRA/CREB1/NTRK2/KDR/AKR1C2/LDLR/AKT1/CEBPB/CDK4/SHMT1/SESN2/SIX1/PRKAA1/YES1/WNT5A/ABL2/FGFR2/GJB3/HDAC2/GNB1/FOLR1/CCL2/CCNB1/SRC/BCL11A/CPEB3/SMARCD1/SREBF1/MTOR/TBX1/HTRA2/XBP1/COL3A1/BAIAP2/PPARGC1A/LARS/AKAP8/SNRNP70/ACACA/ALDH1A2/TEAD2/COL4A1/PTK7/UBR1/PHB2/SH3BP4/LAMTOR4/NEUR…	135
GO:0003206	cardiac chamber morphogenesis	biological process	89/9065	122/17381	1.96715e-06	4.04081e-05	2.90855e-05	1.39874	MEF2C/HES1/ACVR1/GATA6/GATA4/TPM1/NRP1/NOTCH2/CYR61/HAND2/MED1/ZFPM2/JAG1/BMP7/HIF1A/SRF/SMAD4/TGFBR2/TEK/NOTCH1/BMPR2/MDM2/TGFBR1/NSD2/TGFBR3/NRP2/SOX4/HEG1/WNT5A/FGFR2/PARVA/GATA3/HAND1/TBX1/PKP2/GSK3A/TGFB1/TBX2/BMPR1A/FOXC1/SMO/DSP/LRP2/RXRA/VANGL2/RARB/SMAD6/RBPJ/CHD7/SOX11/FKBP1A/NOG/FGFRL1/SMARCD3/SMAD7/ZFPM1/WNT2/HEY2/CITED2/TBX20/UBE4B/RARA/HEYL/FHL2/ENG/NKX2-5/SHOX2/FOXH1/EGLN1/PITX2/FZ…	89
GO:0010508	positive regulation of autophagy	biological process	77/9065	103/17381	1.98567e-06	4.06894e-05	2.9288e-05	1.43338	TP53INP1/PLK2/FOXO1/HMOX1/HIF1A/MAPK3/UVRAG/HK2/SIRT1/KDR/MTDH/IFNG/TBK1/LRRK2/PIP4K2C/SESN2/CDC37/SMCR8/PRKAA1/STK11/RAB12/FYCO1/PIP4K2B/TRIM22/RALB/MFN2/GNAI3/RIPK2/ATG7/LARP1/TSC2/HTT/SUPT5H/PARK7/TSC1/TICAM1/PIP4K2A/SH3BP4/SMURF1/SCOC/TRIM65/ATPIF1/CLEC16A/PLEKHF1/AMBRA1/VPS13C/SPTLC1/ULK1/PRKAA2/IKBKG/TMEM59/MAP3K7/WAC/PAFAH1B2/TRIM8/SH3GLB1/BECN1/TRIM13/RAB3GAP1/RNF152/GBA/MUL1/PIM2/TP53INP…	77
GO:0048596	embryonic camera-type eye morphogenesis	biological process	24/9065	25/17381	2.021e-06	4.12348e-05	2.96806e-05	1.84068	ARID1A/ZEB1/BMP7/SP3/PAX6/FOXF2/WNT5A/FRS2/KDM2B/HIPK2/TBX2/HIPK1/SOX11/TH/IHH/FZD5/TWIST1/TFAP2A/SIX3/PAX2/WNT16/PHACTR4/ALDH1A3/PROX1	24
GO:0009167	purine ribonucleoside monophosphate metabolic process	biological process	202/9065	310/17381	2.02208e-06	4.12348e-05	2.96806e-05	1.24939	HDAC4/TPI1/HSPA1A/MSH2/ATP6V0A1/ADPGK/PKM/IGF1/TMSB4X/PRPS1/POM121/ATP6V1B2/MECP2/P2RX7/PPARA/HIF1A/HK2/SCRIB/STAT3/NDC1/NUP58/HPRT1/CDK1/ATP5B/TJP2/UQCRQ/COX10/PRKAA1/NUP62/NUP50/PDE12/ATP6V1A/POM121C/PRKAG1/NUP160/NDUFS4/NUP210/NT5E/IMPDH1/CCNB1/CYCS/LDHA/COX6B1/UQCRC1/AMPD2/SDHA/GPI/GART/NUP153/ATP5G3/HSPA1B/NDUFB10/ATP5S/TGFB1/ENO1/PFKP/NDUFS7/HSPA8/GAPDH/OGDHL/PFAS/RANBP2/PPARGC1A/PGAM1/ALDO…	202
GO:0043414	macromolecule methylation	biological process	189/9065	288/17381	2.13146e-06	4.33602e-05	3.12104e-05	1.25828	DNMT1/MYB/DNMT3A/DNMT3B/PWP1/EHMT2/EHMT1/ASH2L/BRCA1/EZH2/TRMT13/MECP2/PRMT5/MTA2/NSUN4/SPI1/SMAD4/SIRT1/MGMT/FOS/NSUN5/PRDM16/KMT5A/RBBP5/NSD2/COPRS/HIST1H1D/PHF19/VCPKMT/SETD1B/ICMT/KMT5B/ARID4B/KMT2D/SMYD2/EZH1/BMT2/JARID2/RAB6A/HIST1H1B/PAXBP1/DPY30/SMARCB1/FTSJ1/GATA3/CALM1/WDR82/RPS2/GNAS/ATF7IP/KMT2A/SETD1A/TDRKH/NOP2/CHD5/HIST1H1E/TRIM28/TRMT2A/GSK3A/CTNNB1/NELFE/EEF1A1/HSPA8/SMYD1/ATRX/E…	189
GO:0061614	pri-miRNA transcription from RNA polymerase II promoter	biological process	30/9065	33/17381	2.15617e-06	4.37573e-05	3.14962e-05	1.74307	HDAC4/JUN/DDX5/ETS1/PPARA/TP53/HIF1A/SPI1/PPARG/SRF/SOX9/STAT3/FOS/TERT/NFIB/TGFB1/BMPR1A/SMARCA4/SMAD3/NFATC3/PPARD/YY1/SMAD1/SMAD6/TEAD1/NGFR/BMP2/FOSL1/PDGFB/RELA	30
GO:0051701	interaction with host	biological process	142/9065	209/17381	2.29033e-06	4.63683e-05	3.33756e-05	1.30271	CXCR4/NTRK3/MET/HSPA1A/GRB2/EGFR/ANPEP/AXL/TUSC2/CXCL8/UVRAG/BCL2L11/SCRIB/NCAM1/IFITM1/LDLR/CD46/VAPA/SLC1A5/EPHA2/DDB1/CDK1/KPNA2/CDH1/TYMS/VAMP8/TSG101/TRIM59/IFIT1/IFITM3/CD80/LGALS1/TRIM26/EXOC2/PPIA/CHMP2A/IST1/F11R/SRC/KPNA5/SMC3/ITGAV/ITGB1/CAV1/SCARB1/ATG7/XPR1/UBA52/UBB/HIPK2/NUP153/HSPA1B/KPNB1/TRIM28/CTNNB1/TGFB1/VPS4A/GAPDH/SLC25A6/PABPN1/SMAD3/CTNND1/ITCH/TNIP1/UBC/VPS18/RAB7A/CDHR3…	142
GO:0060324	face development	biological process	42/9065	50/17381	2.38291e-06	4.80117e-05	3.45585e-05	1.61059	RARG/MAP2K1/COL1A1/SRF/MAPK3/PDGFRA/MAPK1/NIPBL/LEF1/WNT5A/DKK1/SKI/TBX1/BRAF/TGFB1/PTPN11/ALDH1A2/ANKRD11/RAF1/PLEKHA1/ARID5B/SGPL1/TIPARP/CHD7/NOG/ASPH/LRP6/BBS4/RAB3GAP1/ZNF84/SOX3/RARA/CRISPLD2/HOXB3/ZFAND5/MKKS/PAX9/ALDH1A3/MMP2/DLX5/MSX1/GRHL2	42
GO:0070936	protein K48-linked ubiquitination	biological process	42/9065	50/17381	2.38291e-06	4.80117e-05	3.45585e-05	1.61059	HACE1/UBE2C/RNF6/NMI/KLHL3/UBE2A/RNF216/TTC3/UBE2Q2/RNF115/ITCH/ARIH2/UBE2K/UBE2E3/UBE2E2/SYVN1/RFFL/AMFR/UBE2D2/UBE2G1/RNF4/RNF146/UBE2D1/UBE2D3/TNFAIP3/RNF152/DTX3L/NEDD4L/UBE2B/TRIM44/RNF126/ZNRF1/PRKN/UBE2G2/UBE2D4/MARCH6/UBE2H/RNF8/RNF34/RNF187/BFAR/CDC34	42
GO:0014706	striated muscle tissue development	biological process	236/9065	369/17381	2.45037e-06	4.9253e-05	3.5452e-05	1.22629	MEF2C/ACVR1/GATA6/WNT3A/CDC42/MEF2A/GATA4/HDAC4/BCL2/WT1/PAK1/TPM1/ARID2/ARID1A/FGF20/IGF1/GJA1/HOXD10/DDX5/G6PD/SOX6/EGR2/FGFR1/MED1/VEGFA/EP300/ERBB3/FGF2/PIM1/MEOX2/ZFPM2/HNRNPU/TSC22D3/EDN1/NF1/ERBB4/BMP7/SRF/SMAD4/PDGFRA/CREB1/RB1/SLC8A1/FGF9/TGFBR2/TP73/NOTCH1/FOS/TGFBR1/LEF1/TGFBR3/SELENON/CDK1/SIX1/HMGCR/SIX4/PRKAA1/HEG1/JARID2/WNT5A/FRS2/KDM6B/FOXN2/FGFR2/ACTA1/CALR/DKK1/EMD/DSG2/KAT2A/F…	236
GO:0043467	regulation of generation of precursor metabolites and energy	biological process	90/9065	124/17381	2.47695e-06	4.96688e-05	3.57513e-05	1.39164	AKT2/HDAC4/IGF1/POM121/IRS1/P2RX7/PPARA/IGF2/HIF1A/STAT3/AKT1/PRDM16/NDC1/HMGB1/NUP58/PHLDA2/CDK1/C1QTNF2/PRKAA1/NUP62/PRELID1/NUP50/NOP53/PDE12/POM121C/PRKAG1/NUP160/NUP210/CCNB1/EPM2AIP1/NUP153/MTOR/GSK3A/RANBP2/PPARGC1A/PPP1CB/PGAM1/CISD1/PFKFB4/PARK7/TIGAR/NUP214/AAAS/TRAP1/NUP37/SLC25A33/TPR/NUPL2/COX17/PRKAA2/DYRK2/NOA1/VCP/NUP98/NUP43/GSK3B/PIK3CA/DDIT4/PPIF/PPP1R3D/OGT/ATP7A/PFKFB2/INS/NU…	90
GO:0051783	regulation of nuclear division	biological process	125/9065	181/17381	2.49821e-06	4.9976e-05	3.59724e-05	1.32415	CDC42/CDC14A/CHEK1/ANLN/CDC14B/HSPA1A/MSH2/TTK/IGF1/ATM/CCSAP/CDKN1C/LIF/PRMT5/CDKN1B/HNRNPU/EDN1/IGF2/BMP7/RB1/CDK13/UBE2C/KNTC1/PKMYT1/TRIP13/NDC80/KIF11/CDC20/BUB1B/CDCA5/CDC6/FBXO5/RCC1/BORA/CDT1/TACC3/ESPL1/TOM1L2/NUP62/WNT5A/CALR/BTC/DYNC1LI1/MKI67/MAD2L1/CENPF/ZNF207/CHMP2A/CCNB1/SMC3/PHIP/TNKS/HSPA1B/SMC1A/FZR1/TGFB1/RANBP3/MAD2L1BP/ATRX/PLK1/RANBP2/IK/STAG2/KLHL22/PHB2/PRKAR1A/AURKAIP1/P…	125
GO:0006261	DNA-dependent DNA replication	biological process	103/9065	145/17381	2.52643e-06	5.04209e-05	3.62927e-05	1.362	CDK9/PRIM1/CCNE1/CCNE2/POLA2/BRCA2/FGFR1/RAD51/FBXW7/PRIMPOL/GMNN/HMGA1/PURA/RFC5/POLA1/ORC6/DONSON/MCM3/MCM10/RFC4/GINS2/POLQ/ZNF365/POLD1/CHTF18/DSCC1/FANCM/POLE/TICRR/MCM5/MCM7/CDC6/PCNA/CDT1/MCM8/POLE2/GINS3/BLM/FEN1/MCM6/MCM4/RPA2/ORC5/GINS1/SLBP/ORC3/MRE11/RFC2/MCM2/LRWD1/MMS22L/SMC3/ATG7/POLD3/DDX11/SMC1A/CDC45/ATRX/MCMBP/E2F8/DNAJA3/ORC1/NUCKS1/PARP1/STAG2/RFC1/RNASEH1/THOC1/CENPS/CDK2/BC…	103
GO:0051056	regulation of small GTPase mediated signal transduction	biological process	201/9065	309/17381	2.55374e-06	5.08454e-05	3.65982e-05	1.24722	STMN1/MET/KRAS/CDC42/RHOT1/RHOB/NRP1/NOTCH2/IGF1/PLEKHG2/PREX1/ARHGEF18/CRK/ARHGAP29/PIK3R2/ARHGDIA/CSF1/NF1/HRAS/TIMP2/NOTCH1/DNM2/LPAR1/RHOA/VAV3/RACGAP1/ECT2/CYTH1/SSX2IP/GBF1/ARHGAP11A/RAC2/ARHGAP19/ARHGAP12/TRIP10/CD2AP/ARHGAP1/NUP62/DLC1/SPRY2/F2RL1/RHOC/MFN2/ITGA3/SRGAP1/GNA13/FRMD7/SRC/ARHGAP28/ITGB1/ITSN2/RHOT2/ARFGEF3/ARHGEF2/GDI2/TIAM1/CGNL1/BCR/TSC2/COL3A1/PSD3/ARFGEF1/IQSEC1/RASAL1/R…	201
GO:0051054	positive regulation of DNA metabolic process	biological process	146/9065	216/17381	2.61336e-06	5.17875e-05	3.72763e-05	1.296	DNMT1/CDC42/JUN/MSH2/EGFR/IGF1/BRCA1/ATM/KLF4/FGFR1/RAD51/HNRNPD/PRKD2/IGF1R/HRAS/MAPK3/PDGFRA/SIRT1/MAPK1/IFNG/MGMT/AKT1/PFN1/UNG/BAX/RFC5/HMGB1/RFC4/HSP90AB1/NSD2/CDK1/CHTF18/DSCC1/MSH6/PCNA/CDT1/CCT3/IL6/SHC1/CALR/MRE11/RFC2/GLI2/HNRNPA1/SRC/IL2/TIMELESS/MYC/HSP90AA1/TNKS/SLX4/PTGES3/TRIM28/DDX11/UBE2N/CTNNB1/TGFB1/WRAP53/CCT5/ATRX/E2F8/CTC1/PPARGC1A/RIF1/CCT7/RNF168/NABP2/XRCC1/BRCC3/PARP1/TI…	146
GO:0090092	regulation of transmembrane receptor protein serine/threonine kinase signaling pathway	biological process	146/9065	216/17381	2.61336e-06	5.17875e-05	3.72763e-05	1.296	HES1/ACVR1/GATA6/GATA4/HSPA1A/PPM1A/THBS1/SNX6/TTK/CYR61/ZEB1/CHST11/CDKN1C/BMP7/SMAD4/ACVR2B/SIRT1/XIAP/ILK/FGF9/TGFBR2/NOTCH1/DNM2/BMPR2/SMAD2/TGFBR1/PRDM16/DLX1/HSP90AB1/TGFBR3/WWTR1/STK11/SPART/MTMR4/ACVR2A/WNT5A/RNF111/FBN1/DKK1/CD109/LEMD3/MYOCD/ITGA3/FOLR1/NBL1/CAV1/BCL9L/UBA52/ZNF703/UBB/HIPK2/BAMBI/UBE2O/PDPK1/SKI/TRIM33/FBN2/TGFB1/BMPR1A/FKBP8/PARP1/PEG10/SMAD3/CTDSPL2/DACT2/SMURF1/UBC/…	146
GO:0019079	viral genome replication	biological process	83/9065	113/17381	2.73557e-06	5.40822e-05	3.8928e-05	1.40834	CDC42/BCL2/RNASEL/HACD3/PPIB/DDX5/ADAR/HMGA2/NFIA/CXCL8/NOTCH1/IFITM1/RAB5A/VAPA/DDX3X/FAM111A/DDB1/TOP2A/ADARB1/RSAD2/IFIT1/ISG15/IFITM3/OASL/IFIT5/SLPI/NR5A2/PDE12/SMARCB1/PPIA/CTBP2/ISG20/CTBP1/CCL2/RAB29/LARP1/TRIM28/PABPC1/RAD23A/ILF3/HSPA8/PARP10/SUPT5H/NUCKS1/TNIP1/PPIE/VAPB/DEK/SRPK1/MAVS/UBP1/ATG16L1/VCP/TNF/ROCK2/TARBP2/CCNK/PCBP1/FMR1/GRK2/PCBP2/CCL5/PLSCR1/STOM/APOBEC3F/STAU1/PRKN/APO…	83
GO:0016571	histone methylation	biological process	93/9065	129/17381	2.74731e-06	5.41869e-05	3.90034e-05	1.38229	DNMT1/MYB/DNMT3B/PWP1/EHMT2/EHMT1/ASH2L/BRCA1/EZH2/MECP2/PRMT5/SMAD4/SIRT1/PRDM16/KMT5A/RBBP5/NSD2/COPRS/HIST1H1D/PHF19/SETD1B/KMT5B/ARID4B/KMT2D/SMYD2/EZH1/JARID2/HIST1H1B/PAXBP1/DPY30/SMARCB1/GATA3/WDR82/KMT2A/SETD1A/CHD5/HIST1H1E/CTNNB1/NELFE/SMYD1/ATRX/RIF1/ASH1L/BCOR/KDM3A/IWS1/CHTOP/CXXC1/HIST1H1C/SETDB1/SUV39H1/PRMT1/BEND3/KMT2C/NSD1/SETD7/RLF/PRMT7/NSD3/PRMT3/SETD2/SUZ12/CARM1/TET3/OGT/DO…	93
GO:0042493	response to drug	biological process	260/9065	411/17381	2.78226e-06	5.47482e-05	3.94074e-05	1.21294	DRD1/MEF2C/GATA6/CDK9/GATA4/MYO6/CCND1/CDKN1A/FOXO3/HDAC4/ANXA1/DNMT3A/BCL2/JUN/PMS1/DNMT3B/SOD1/THBS1/EGFR/KCNQ1/ABCC1/HMGA2/PNP/RAD51/ABCC3/NR1I2/HNRNPD/UMPS/COL1A1/P2RX7/JUNB/CPT1A/KCNH2/CDKN1B/NFATC2/EDN1/CHUK/TP53/PPARG/CREB1/PTCH1/IGFBP2/PTGS2/TIMP2/SLC8A1/TGFBR2/TP73/IFNG/MGMT/RAP1A/STAT3/FOS/FABP3/MDM2/CDK4/ATP1A1/XPO1/VAV3/HSP90AB1/NPPC/PRNP/CDK1/CDH1/TYMS/MCM7/IL6/LRP8/HMGCS1/BGLAP/SS18…	260
GO:0031571	mitotic G1 DNA damage checkpoint	biological process	56/9065	71/17381	2.82414e-06	5.53138e-05	3.98146e-05	1.5123	PLK2/CCND1/CDKN1A/E2F1/CENPJ/ATM/EP300/CNOT6/CDKN1B/TP53/TP73/MDM2/BAX/GADD45A/CDK1/PCNA/SOX4/RPA2/TNKS1BP1/CNOT4/ZNF385A/SFN/CCNB1/UBA52/UBB/CNOT1/GIGYF2/E2F8/NPM1/CASP2/FBXO31/CNOT8/CNOT9/RPL26/UBC/PRMT1/AURKA/CNOT6L/CDK2/E2F4/CNOT11/CARM1/BTG2/TFDP1/RBL2/ARID3A/MDM4/TFDP2/CHEK2/MUC1/RPS27A/E2F7/CNOT2/CRADD/TRIAP1/TP63	56
GO:0044819	mitotic G1/S transition checkpoint	biological process	56/9065	71/17381	2.82414e-06	5.53138e-05	3.98146e-05	1.5123	PLK2/CCND1/CDKN1A/E2F1/CENPJ/ATM/EP300/CNOT6/CDKN1B/TP53/TP73/MDM2/BAX/GADD45A/CDK1/PCNA/SOX4/RPA2/TNKS1BP1/CNOT4/ZNF385A/SFN/CCNB1/UBA52/UBB/CNOT1/GIGYF2/E2F8/NPM1/CASP2/FBXO31/CNOT8/CNOT9/RPL26/UBC/PRMT1/AURKA/CNOT6L/CDK2/E2F4/CNOT11/CARM1/BTG2/TFDP1/RBL2/ARID3A/MDM4/TFDP2/CHEK2/MUC1/RPS27A/E2F7/CNOT2/CRADD/TRIAP1/TP63	56
GO:0044773	mitotic DNA damage checkpoint	biological process	76/9065	102/17381	2.87297e-06	5.61395e-05	4.04089e-05	1.42863	PLK2/CCND1/CDKN1A/E2F1/CENPJ/MSH2/ATM/EP300/HMGA2/CNOT6/CDKN1B/TP53/TP73/MDM2/BAX/GADD45A/DONSON/FANCI/CDK1/PCNA/BLM/SOX4/RPA2/TNKS1BP1/CNOT4/ZNF385A/MDC1/MRE11/NOP53/SFN/CCNB1/RAD9A/UBA52/UBB/CNOT1/GIGYF2/E2F8/NPM1/CASP2/FBXO31/FOXN3/ORAOV1/CNOT8/CNOT9/TAOK3/RPL26/UBC/PRMT1/AURKA/CNOT6L/CDK2/E2F4/CNOT11/ATF2/CARM1/BTG2/TFDP1/RBL2/ARID3A/MDM4/TFDP2/SYF2/CHEK2/MUC1/FOXO4/TIPIN/RPS27A/E2F7/CNOT2/CR…	76
GO:0032956	regulation of actin cytoskeleton organization	biological process	192/9065	294/17381	2.88464e-06	5.62371e-05	4.04791e-05	1.25216	NTRK3/MEF2C/STMN1/MET/CDC42/ROCK1/PAK1/LRP1/GRB2/TPM1/NRP1/TMSB4X/SH3PXD2B/PLEKHG2/PREX1/SDC4/CRK/TAC1/FSCN1/PRKCE/ALMS1/ARHGDIA/TWF1/EDN1/TWF2/HRAS/SMAD4/PDGFRA/ILK/TEK/CTGF/NTF3/PFN1/WASF2/LPAR1/RHOA/TGFBR1/CXCL12/VASP/CDC42EP4/ABI2/NF2/SPIRE1/LIMA1/CAPZB/PPP1R9A/CD2AP/DLC1/ABL2/CAPZA1/ARPC5/DMTN/F2RL1/SYNPO2L/PHLDB2/CTTN/CAPG/TMOD3/PLEKHH2/FRMD7/F11R/ARHGAP28/ARF1/CORO1B/MTOR/BRAF/SORBS3/TGFB1…	192
GO:0006977	DNA damage response, signal transduction by p53 class mediator resulting in cell cycle arrest	biological process	50/9065	62/17381	2.92196e-06	5.68007e-05	4.08848e-05	1.54627	PLK2/CDKN1A/E2F1/CENPJ/ATM/EP300/CNOT6/CDKN1B/TP53/MDM2/BAX/GADD45A/CDK1/PCNA/SOX4/TNKS1BP1/CNOT4/ZNF385A/SFN/CCNB1/UBA52/UBB/CNOT1/E2F8/NPM1/CASP2/CNOT8/CNOT9/RPL26/UBC/PRMT1/AURKA/CNOT6L/CDK2/E2F4/CNOT11/CARM1/BTG2/TFDP1/RBL2/ARID3A/MDM4/TFDP2/CHEK2/MUC1/RPS27A/E2F7/CNOT2/CRADD/TRIAP1	50
GO:0014031	mesenchymal cell development	biological process	52/9065	65/17381	2.92704e-06	5.68007e-05	4.08848e-05	1.5339	HES1/ACVR1/ZEB2/BCL2/NRP1/CORO1C/HAND2/EDN1/JAG1/ERBB4/BMP7/HIF1A/SOX9/MAPK3/MAPK1/NOTCH1/SNAI2/EDNRA/LEF1/FOLR1/RDH10/PEF1/TCOF1/TBX1/BMPR1A/EFNB1/FOXC1/ALDH1A2/CFL1/NOLC1/SMO/KLHL12/TAPT1/SOX11/RET/HEY2/TWIST1/HEYL/LAMA5/SEMA3F/EDN3/KBTBD8/ALX1/PHOX2B/GDNF/PITX2/SHH/FGF19/PHACTR4/KITLG/SEMA3A/NRG1	52
GO:0034101	erythrocyte homeostasis	biological process	81/9065	110/17381	3.04369e-06	5.89286e-05	4.24165e-05	1.41188	FOXO3/CDK6/HOXA5/MAFB/SFXN1/AXL/ADAR/G6PD/SOX6/MED1/VEGFA/ETS1/HMOX1/HIF1A/SPI1/SRF/SP3/RB1/STAT3/SMAD5/RBFOX2/SENP1/TGFBR3/ACVR2A/KIT/STAT1/ISG15/DMTN/TMOD3/GATA3/DNASE2/SETD1A/HIPK2/GPI/RPS6/RPS14/MAEA/NFE2L1/STAT5B/HSPA9/PTBP3/ATPIF1/PRMT1/CEBPG/ACVR1B/INHBA/RPS17/CASP3/JMJD6/TAL1/BCL6/ZFP36L1/KLF13/B2M/RPS24/THRA/ZFPM1/LYN/RPS19/LDB1/SLC11A2/KLF2/DYRK3/FLVCR1/EPAS1/ADD1/HOXB6/PKNOX1/MAPK14/HM…	81
GO:0009123	nucleoside monophosphate metabolic process	biological process	217/9065	337/17381	3.05998e-06	5.91081e-05	4.25456e-05	1.23463	HDAC4/TPI1/HSPA1A/MSH2/ATP6V0A1/ADPGK/PKM/IGF1/TMSB4X/PRPS1/POM121/ATP6V1B2/MECP2/UMPS/P2RX7/PPARA/HIF1A/HK2/SCRIB/STAT3/NDC1/SHMT1/NUP58/TK1/DUT/HPRT1/CDK1/ATP5B/TYMS/TJP2/UQCRQ/COX10/PRKAA1/NUP62/RFK/CAD/NUP50/PDE12/ATP6V1A/POM121C/PRKAG1/NUP160/NDUFS4/NUP210/NT5E/IMPDH1/CCNB1/CYCS/LDHA/COX6B1/UQCRC1/AMPD2/SDHA/GPI/GART/NUP153/ATP5G3/HSPA1B/NDUFB10/ATP5S/TGFB1/ENO1/PFKP/NDUFS7/HSPA8/GAPDH/OGDHL…	217
GO:0045069	regulation of viral genome replication	biological process	65/9065	85/17381	3.27153e-06	6.30499e-05	4.53829e-05	1.46623	BCL2/RNASEL/HACD3/PPIB/DDX5/ADAR/HMGA2/CXCL8/NOTCH1/IFITM1/VAPA/DDX3X/FAM111A/DDB1/TOP2A/ADARB1/RSAD2/IFIT1/ISG15/IFITM3/OASL/IFIT5/SLPI/NR5A2/PDE12/PPIA/ISG20/LARP1/TRIM28/PABPC1/RAD23A/ILF3/HSPA8/PARP10/NUCKS1/TNIP1/PPIE/VAPB/SRPK1/MAVS/TNF/TARBP2/CCNK/FMR1/CCL5/PLSCR1/STOM/APOBEC3F/STAU1/PRKN/APOBEC3D/ZC3HAV1/OAS3/IFNB1/LTF/SRPK2/PKN2/APOBEC3A/CD28/EIF2AK2/PROX1/TBC1D20/IFI16/TRIM6/APOBEC3C	65
GO:0007088	regulation of mitotic nuclear division	biological process	110/9065	157/17381	3.39074e-06	6.51983e-05	4.69293e-05	1.34338	CDC42/CDC14A/CHEK1/ANLN/CDC14B/HSPA1A/TTK/IGF1/ATM/CCSAP/CDKN1C/PRMT5/CDKN1B/HNRNPU/EDN1/IGF2/BMP7/RB1/CDK13/UBE2C/KNTC1/PKMYT1/TRIP13/NDC80/KIF11/BUB1B/CDCA5/CDC6/FBXO5/RCC1/BORA/CDT1/TACC3/ESPL1/TOM1L2/NUP62/BTC/DYNC1LI1/MKI67/MAD2L1/CENPF/ZNF207/CHMP2A/CCNB1/SMC3/PHIP/TNKS/HSPA1B/SMC1A/TGFB1/RANBP3/MAD2L1BP/ATRX/PLK1/RANBP2/IK/STAG2/KLHL22/PHB2/AURKAIP1/PDXP/TPR/CCDC8/AURKA/PTTG1/APC/NAA10/BUB…	110
GO:0031668	cellular response to extracellular stimulus	biological process	145/9065	215/17381	3.42258e-06	6.56605e-05	4.7262e-05	1.29311	UCP2/CDKN1A/BCL2/JUN/FOXO1/EHMT2/AXL/MED1/KLF10/COL1A1/PIM1/P2RX7/WNT9B/HMOX1/FAS/TP53/PPARG/SRF/MAPK3/SIRT1/MAPK1/FOS/PMAIP1/BMPR2/LRRK2/SNAI2/MDM2/MAPK8/SESN2/MAX/KANK2/IL6/PRKAA1/GLUL/FNIP1/BGLAP/GSTP1/STK24/USP33/ITGA6/RALB/DCTPP1/FADS1/MYOCD/FOLR1/TRIM24/HNRNPA1/ATG7/SREBF1/MTOR/XBP1/HSPA8/RIPOR1/USF1/LARS/SLC38A2/MARS/TSC1/MYBBP1A/CBS/SLC2A1/CLEC16A/DEPDC5/ATF3/AMBRA1/SREBF2/ATF4/BRIP1/TXN2…	145
GO:0030178	negative regulation of Wnt signaling pathway	biological process	136/9065	200/17381	3.46476e-06	6.63187e-05	4.77358e-05	1.30381	NLK/CCND1/FOXO3/FOXO1/LRP1/LRP4/CYLD/DVL2/RNF213/SOX2/SOX9/HDAC1/IGFBP2/FGF9/NOTCH1/SNAI2/LEF1/WWTR1/APCDD1/PSMD9/GRB10/WNT5A/HMGXB4/CSNK1A1/TMEM64/DKK1/NXN/PSME1/G3BP1/CDH2/CAV1/AXIN1/UBA52/PSMD3/UBB/PSMB2/TMEM131L/RACK1/FRZB/CTNNBIP1/DVL1/TSC2/GSK3A/PSMD4/PSMD11/LIMD1/JADE1/PSMC1/PSMB3/PSMA7/PSMC5/KREMEN1/RAPGEF1/CTNND1/PSMD2/UBC/PSMD6/PSMC4/PSMD1/PSME3/PSMD7/KLHL12/APC/PSMA2/PSMD8/PSMD13/PSMC3…	136
GO:0001822	kidney development	biological process	174/9065	264/17381	3.57051e-06	6.81878e-05	4.90812e-05	1.26372	MEF2C/HES1/NOTCH3/BCL2/WT1/RIDA/NRP1/SDC4/FGFR1/VEGFA/FGF2/LRP4/HOXB7/CDKN1C/LIF/WNK4/WNT9B/JAG1/NF1/BMP7/SMAD4/SOX9/PDGFRA/PTCH1/MTSS1/ACVR2B/BCL2L11/ILK/PODXL/TEK/TP73/IFNG/NOTCH1/SDC1/SMAD5/LRRK2/SMAD2/TGFBR1/NIPBL/BAX/BASP1/SIX1/MPST/SULF2/WWTR1/SEC61A1/SOX4/EPHA4/SIX4/STAT1/FBN1/FGFR2/KLHL3/RGN/CENPF/MME/GLI2/ITGA3/GATA3/LGR4/RDH10/EPHA7/HOXC11/MYC/BAG6/MAGED1/SALL1/HOXD11/CTNNBIP1/CTNNB1/TG…	174
GO:0042594	response to starvation	biological process	119/9065	172/17381	3.74773e-06	7.14104e-05	5.14007e-05	1.32656	UCP2/CDKN1A/BCL2/JUN/FOXO1/EHMT2/FSTL1/KLF10/WNT9B/FAS/TP53/PPARG/MAPK3/SIRT1/MAPK1/PMAIP1/BMPR2/LRRK2/MAPK8/SESN2/MAX/PRKAA1/GLUL/FNIP1/STK24/USP33/RALB/OXCT1/FADS1/HNRNPA1/ATG7/LARP1/SREBF1/MTOR/XBP1/LRP11/HSPA8/RIPOR1/PPARGC1A/LARS/SLC38A2/MARS/MYBBP1A/SLC2A1/GNPAT/CLEC16A/DEPDC5/ATF3/AMBRA1/SREBF2/ATF4/EIF2A/ULK1/FBXO22/PRKAA2/ACAT1/SFRP1/HSPA5/HFE/CBL/EIF2S1/GABARAPL1/SH3GLB1/MTMR3/EIF4EBP1/…	119
GO:0060317	cardiac epithelial to mesenchymal transition	biological process	29/9065	32/17381	3.77707e-06	7.18069e-05	5.16862e-05	1.73762	ACVR1/PDCD4/SMAD4/TGFBR2/NOTCH1/SNAI2/TGFBR1/TGFBR3/ERG/SPRY1/ADAM15/EFNA1/RBPJ/NOG/HAS2/SNAI1/WNT2/HEY2/TWIST1/HEYL/BMP2/ENG/TMEM100/RTN4/MSX2/WNT16/TGFB2/HEY1/MSX1	29
GO:0001101	response to acid chemical	biological process	209/9065	324/17381	3.86128e-06	7.31656e-05	5.26642e-05	1.23682	DNMT1/NTRK3/WNT3A/MYB/UCP2/TLR2/E2F1/DNMT3A/FOXO1/RARG/EGFR/GJA1/ADCY6/ZEB1/KLF4/PRKCE/HNRNPD/COL1A1/CPT1A/WNT9B/CDKN1B/EDN1/TWF2/CHUK/PPARG/SOX9/PDGFRA/CREB1/PTCH1/NTRK2/KDR/IGFBP2/PTGS2/CTGF/MGMT/AKR1C2/LDLR/AKT1/FABP3/CEBPB/CDK4/SHMT1/GJB2/DHFRP1/TGFBR3/SESN2/SIX1/TYMS/PCNA/IL6/PRKAA1/SLC10A3/YES1/WNT5A/ABL2/GSTP1/FGFR2/GJB3/ATP2B4/DKK1/HDAC2/IGFBP7/GNB1/FOLR1/CCL2/ARG1/CCNB1/SRC/BCL11A/CPEB3/…	209
GO:0043525	positive regulation of neuron apoptotic process	biological process	41/9065	49/17381	3.86591e-06	7.31656e-05	5.26642e-05	1.60433	MYB/CDC42/FOXO3/HDAC4/JUN/MCL1/CASP9/PITX3/ATM/FBXW7/NF1/TP53/MAP3K11/BCL2L11/BAX/PRNP/ITGA1/EPHA7/GSK3A/CTNNB1/CASP2/ATF4/GRIK5/CASP3/ATF2/CDK5R1/PIN1/CCL3/NQO2/PCSK9/TFAP2A/TFAP2B/DDIT3/MAP2K4/ASCL1/FASLG/TGFB2/SRPK2/PAK3/MYBL2/CDC34	41
GO:0035019	somatic stem cell population maintenance	biological process	57/9065	73/17381	4.13846e-06	7.81482e-05	5.62506e-05	1.49713	HES1/CDX2/FOXP1/POLR2K/KLF4/FGF2/KLF10/WNT9B/SOX2/BMP7/SPI1/SMAD4/SOX9/STAT3/NANOG/SMAD2/PRDM16/POLR2D/ZFP36L2/SOX4/KIT/POLR2I/BCL9L/SKI/SALL1/POLR2A/BRAF/POLR2L/POLR2B/POLR2C/CUL4A/POLR2F/RAF1/SFRP1/VANGL2/RBPJ/NOG/LIN28A/ZHX2/ASCL2/PAX8/LDB1/VPS72/PAX2/EPAS1/WNT7A/POLR2E/NR2E1/EPHA1/LDB2/TP63/POU5F1/HNF1B/PBX1/GATA2/SALL4/DPPA4	57
GO:0032970	regulation of actin filament-based process	biological process	217/9065	338/17381	4.15827e-06	7.83467e-05	5.63935e-05	1.23098	NTRK3/MEF2C/STMN1/MET/CDC42/HCN4/GATA4/ROCK1/PAK1/LRP1/GRB2/CACNA1C/TPM1/NRP1/TMSB4X/SH3PXD2B/KCNJ2/PLEKHG2/PREX1/SDC4/CRK/TAC1/FSCN1/PRKCE/ALMS1/ARHGDIA/TWF1/EDN1/TWF2/HRAS/SMAD4/PDGFRA/ILK/TEK/CTGF/NTF3/PFN1/WASF2/PDPN/LPAR1/RHOA/TGFBR1/CXCL12/ATP1A1/VASP/CDC42EP4/ABI2/NF2/SPIRE1/LIMA1/CAPZB/PPP1R9A/CD2AP/DLC1/ABL2/CAPZA1/CNN2/ARPC5/DMTN/JUP/F2RL1/TRPM4/DSG2/SYNPO2L/FLNA/PHLDB2/SRI/CTTN/CAPG/TM…	217
GO:1901991	negative regulation of mitotic cell cycle phase transition	biological process	150/9065	224/17381	4.34961e-06	8.17232e-05	5.88239e-05	1.28396	PLK2/CCND1/CDKN1A/E2F1/BCL2/CENPJ/TTK/BRCA1/ATM/EP300/HMGA2/EZH2/CNOT6/CDKN1B/TP53/BRD7/RB1/TP73/MDM2/ZFP36L2/BAX/GADD45A/DONSON/FANCI/TRIP13/NDC80/BUB1B/CTDSP2/CDK1/TICRR/PCNA/CDT1/KANK2/BLM/SOX4/NACC2/RPA2/TNKS1BP1/PSMD9/CNOT4/ZNF385A/DYNC1LI1/MRE11/MAD2L1/NOP53/CENPF/ZNF207/PSME1/SFN/CCNB1/UBA52/PSMD3/UBB/PSMB2/CNOT1/PSMD4/PSMD11/VPS4A/GIGYF2/SKP1/JADE1/SMARCA4/PSMC1/E2F8/PLK1/NPM1/CASP2/FBXO3…	150
GO:0051650	establishment of vesicle localization	biological process	166/9065	251/17381	4.35689e-06	8.17232e-05	5.88239e-05	1.26806	WNT3A/KIF23/SEC23IP/GAK/CTSC/AP3D1/AP3B1/TRAPPC3/USO1/P2RX7/SNAPIN/SCRIB/RAP1A/RAB5A/DNM2/LRRK2/SEC31A/GBF1/TMED2/SEC23A/NDEL1/RAB1B/PPP6R3/SYBU/MREG/FYCO1/TRAPPC10/RIMS3/RAB11A/RIMS4/SYT12/STON2/MOBP/RIMS2/RAP1B/KIF5B/ACTN4/RAB27B/TRIM9/FOLR1/SEC16A/VAMP7/MAP4K2/SYT9/ARF1/SH3GL1/PEF1/NDE1/BRAF/BET1/CTNNB1/DYNC1H1/SYT4/MCFD2/HTT/FCHO2/NSF/TFG/CYFIP1/AP3M2/PIP5K1C/GOSR1/MYO5A/TMED9/CANX/KLHL12/SEC…	166
GO:0007004	telomere maintenance via telomerase	biological process	53/9065	67/17381	4.4413e-06	8.31214e-05	5.98303e-05	1.51673	ATM/HNRNPU/MAPK3/MAPK1/HSP90AB1/TERT/CCT3/TNKS1BP1/MRE11/HNRNPA1/SRC/HSP90AA1/TNKS/HNRNPC/PTGES3/CTNNB1/WRAP53/CCT5/NOP10/SMG5/CTC1/CCT7/EXOSC10/CCT4/CCT2/RFC1/CCT6A/NHP2/TCP1/XRCC5/SMG6/PINX1/PAPD5/NEK7/MAP3K4/AURKB/MAP2K7/HMBOX1/GNL3L/TERF2IP/SMG7/MAPKAPK5/RAD50/POT1/STN1/XRN1/NAT10/PARN/TERF1/DCP2/TERF2/TNKS2/NEK2	53
GO:1904375	regulation of protein localization to cell periphery	biological process	66/9065	87/17381	4.47973e-06	8.36547e-05	6.02142e-05	1.45456	WNT3A/LRP1/PICALM/EGFR/LZTFL1/RAB11FIP2/PRKCE/CSK/AGR2/PPP2R5A/IFNG/AKT1/CSNK2A1/EPHA2/PRNP/VAMP8/GOPC/GNAI1/RAB11A/KIF5B/PLS1/CLTC/ITGA3/EPB41L2/ITGB1/EPB41/PDPK1/RACK1/TGFB1/VPS4A/STX7/TMBIM1/SPTBN1/APPL1/PPFIA1/EZR/BCL2L1/TMEM59/AR/NUMB/ARF6/SQSTM1/RHOQ/PIK3R1/RER1/CNST/PRKCH/INS/ACSL3/WNK3/EPHB2/AP2M1/NKD2/KCNJ11/DAB2/RHOG/LYPLA1/LRRC15/STX4/SAPCD2/GPSM2/LDLRAP1/DLG1/NUMA1/STX3/GPER1	66
GO:0044786	cell cycle DNA replication	biological process	47/9065	58/17381	4.51321e-06	8.40935e-05	6.053e-05	1.55373	PRIM1/POLA2/BRCA2/FGFR1/RAD51/FBXW7/GMNN/RFC5/POLA1/DONSON/RFC4/GINS2/POLD1/POLE/PCNA/CDT1/POLE2/FEN1/RPA2/GINS1/SLBP/ORC3/MRE11/RFC2/SMC3/POLD3/SMC1A/CDC45/ATRX/E2F8/STAG2/RFC1/BCL6/CHEK2/UPF1/TIPIN/WIZ/E2F7/DNA2/POLE3/TERF1/TERF2/INO80/PRIM2/POLE4/POLD4/RPA1	47
GO:0046794	transport of virus	biological process	49/9065	61/17381	4.55549e-06	8.46938e-05	6.09621e-05	1.54019	POM121/NDC1/XPO1/NUP58/KPNA2/TSG101/RAN/NUP62/NUP50/POM121C/NUP160/NUP210/KPNA5/CAV1/UBA52/UBB/VPS37C/NUP153/KPNB1/RANBP2/NUP214/AAAS/NUP37/UBC/VPS37B/TPR/NUPL2/KPNA1/NUP98/NUP43/VPS37A/FMR1/NUP205/NUP155/RPS27A/SEH1L/NUP54/NUP93/KPNA4/KPNA3/VPS37D/NUP188/MVB12B/CAV2/NUP85/CD209/NUP35/NMT2/EPS15	49
GO:1990138	neuron projection extension	biological process	101/9065	143/17381	4.76849e-06	8.84587e-05	6.3672e-05	1.35423	NTRK3/WNT3A/RAB21/PAK1/NRP1/SHTN1/VEGFA/CPNE6/FN1/DDR1/TWF2/SRF/ILK/DNM2/BMPR2/CXCL12/NRP2/NDEL1/STK11/RNF6/RAB11A/WNT5A/RIMS2/PLXNA4/CDH4/CTTN/L1CAM/BCL11A/ITGB1/ITSN2/TTL/VCL/TIAM1/DVL1/CTNNB1/MAP1B/TRPC5/SYT4/SLIT1/SLC9A6/RASAL1/CYFIP1/ZFYVE27/WDR36/MEGF8/SMURF1/IQGAP1/ABL1/AURKA/GOLGA4/RAPH1/USP9X/ULK1/PLXNA1/PPP3CB/NKX6-1/DPYSL2/APOE/PAFAH1B1/CDK5R1/GDI1/SEMA7A/ALCAM/LIMK1/PTPRS/PLXNA2/MAPT/…	101
GO:0060840	artery development	biological process	64/9065	84/17381	4.84114e-06	8.9609e-05	6.45e-05	1.46086	HES1/NOTCH3/LRP1/NRP1/ARID2/HAND2/SUFU/VEGFA/JAG1/NF1/SRF/ACVR2B/NOTCH1/DNM2/BMPR2/TGFBR1/MYLK/LOXL1/SIX1/SOX4/LUZP1/MYOCD/FOLR1/AP2B1/TBX1/TBX2/COL3A1/BMPR1A/PLXND1/FOXC1/NDST1/EFNB2/DCTN5/SEC24B/LRP2/APOE/PRDM1/SMAD6/RBPJ/CHD7/PRICKLE1/NOG/SMAD7/LOX/GLI3/HOXA1/HEY2/TFAP2B/ENG/NPRL3/FOXH1/TAB1/ANGPTL3/ADAMTS9/PRRX1/SHH/APOB/TGFB2/ZMIZ1/PROX1/ACVRL1/HPGD/DLL4/HEY1	64
GO:0032388	positive regulation of intracellular transport	biological process	219/9065	342/17381	4.91343e-06	9.07476e-05	6.53196e-05	1.22779	HES1/WNT3A/CDC42/AKT2/TLR2/E2F1/BAP1/RAB21/BCL2/PPM1A/PAK1/YWHAQ/F2/EGFR/ANXA2/ANP32B/IGF1/HPS4/MED1/FBXW7/PIK3R2/APP/EHD2/SNAPIN/TP53/ERBB2/ERBB4/SMAD4/BCL2L11/MAPK1/MSN/TLR4/PTGS2/TP73/IFNG/YWHAZ/PMAIP1/LRRK2/MDM2/RHOA/TGFBR1/MAPK8/BAX/PCNT/STARD7/HHAT/ECT2/HSP90AB1/PRNP/FAM20B/CDK1/CDH1/SULF2/VAMP8/RAC2/IL6/DYNLL2/YWHAH/NKAP/JUP/KIF5B/EMD/KAT2A/FLNA/PDCD10/UBR5/CCL2/VAMP7/SFN/CSNK2A2/MIEF1/RAB…	219
GO:0009895	negative regulation of catabolic process	biological process	171/9065	260/17381	5.23885e-06	9.65461e-05	6.94933e-05	1.26104	MET/GATA4/E2F1/HDAC4/BCL2/MCL1/EGFR/ANXA2/SUFU/TIMP3/MAPK7/WDR6/HNRNPD/HMOX1/PPARA/HNRNPU/FHIT/N4BP1/TIMP2/PIK3CG/STAT3/AKT1/LRRK2/TAF9/HSP90AB1/SENP1/SNX12/SMCR8/EPHA4/PRKAA1/PDE3B/RNF41/TARDBP/BAG5/ATP2B4/MAD2L1/NOP53/SMARCC1/EIF4G1/FLNA/RGN/PTPN22/UBAC2/DFFA/IGF2BP1/YBX1/ATG7/DHX34/CCAR2/BAG6/PAIP1/LARP1/SECISBP2/UBQLN4/MTOR/HNRNPC/HTRA2/TSC2/GSK3A/PABPC1/HERC1/EIF4G2/PPARGC1A/PHF23/LARS/SNRNP…	171
GO:0007517	muscle organ development	biological process	246/9065	389/17381	5.29667e-06	9.73986e-05	7.0107e-05	1.21253	MEF2C/GATA6/WNT3A/MEF2A/HDAC4/BCL2/WT1/PAK1/TPM1/FGF20/UTRN/IGF1/GJA1/HOXD10/DDX5/SERP1/G6PD/SOX6/EGR2/FGFR1/MED1/EP300/ERBB3/FGF2/PIM1/LIF/MEOX2/ZFPM2/PAX3/TSC22D3/EDN1/NF1/ERBB4/SMAD4/CREB1/SIRT1/RB1/FGF9/TGFBR2/TP73/NOTCH1/FOS/TGFBR1/BASP1/MYLK/LEF1/TGFBR3/SELENON/CDK1/SIX1/COPRS/HMGCR/IL6/SIX4/ADARB1/KMT5B/PRKAA1/HEG1/JARID2/WNT5A/FRS2/FOXK1/FOXN2/FGFR2/ACTA1/DKK1/EMD/PAXBP1/FLNB/CENPF/SRI/GP…	246
GO:0001952	regulation of cell-matrix adhesion	biological process	76/9065	103/17381	5.37054e-06	9.81143e-05	7.06221e-05	1.41476	BCL2/CDK6/ROCK1/THBS1/NRP1/CORO1C/UTRN/SDC4/HOXA7/VEGFA/PTK2/PLAU/CSF1/DDR1/NF1/SERPINE1/CDKN2A/KDR/ILK/TEK/RHOA/LIMS1/NF2/DLC1/RCC2/DMTN/PHLDB2/CDH13/THY1/SRC/MINK1/TSC1/SMAD3/PTEN/IQGAP1/SLC9A1/ABL1/CAMSAP3/PPM1F/SFRP1/ADAM15/GSK3B/RAC1/BCL6/ROCK2/ONECUT2/PTPRJ/PIK3R1/ACER2/PLEKHA2/MMP14/MYF5/FMN1/GREM1/ONECUT1/PLET1/DISC1/LDB1/CLASP1/CASK/AJAP1/EFNA5/EPHA1/GPM6B/WNT4/EMP2/VEGFC/SEMA3E/NINJ1/WD…	76
GO:0017015	regulation of transforming growth factor beta receptor signaling pathway	biological process	76/9065	103/17381	5.37054e-06	9.81143e-05	7.06221e-05	1.41476	HSPA1A/PPM1A/THBS1/SNX6/ZEB1/CHST11/CDKN1C/SMAD4/SIRT1/TGFBR2/DNM2/SMAD2/TGFBR1/PRDM16/HSP90AB1/TGFBR3/STK11/MTMR4/RNF111/FBN1/CD109/LEMD3/MYOCD/ITGA3/FOLR1/CAV1/BCL9L/UBA52/ZNF703/UBB/HIPK2/BAMBI/PDPK1/SKI/TRIM33/FBN2/TGFB1/PEG10/SMAD3/SMURF1/UBC/HSPA5/WNT1/ONECUT2/SMAD6/SKIL/SDCBP/SOX11/SMAD7/PIN1/DKK3/ONECUT1/CITED2/SMURF2/GLG1/MEN1/WFIKKN2/ZNF451/RPS27A/ENG/ADAM17/FLCN/PMEPA1/NPNT/VASN/DAB2/G…	76
GO:0034968	histone lysine methylation	biological process	76/9065	103/17381	5.37054e-06	9.81143e-05	7.06221e-05	1.41476	DNMT1/MYB/DNMT3B/PWP1/EHMT2/EHMT1/ASH2L/BRCA1/EZH2/MECP2/SMAD4/SIRT1/PRDM16/KMT5A/RBBP5/NSD2/HIST1H1D/PHF19/SETD1B/KMT5B/ARID4B/KMT2D/SMYD2/EZH1/JARID2/HIST1H1B/DPY30/SMARCB1/GATA3/WDR82/KMT2A/SETD1A/CHD5/HIST1H1E/CTNNB1/NELFE/SMYD1/ATRX/RIF1/ASH1L/BCOR/KDM3A/IWS1/CXXC1/HIST1H1C/SETDB1/SUV39H1/BEND3/KMT2C/NSD1/SETD7/RLF/NSD3/SETD2/SUZ12/TET3/OGT/DOT1L/KDM6A/MEN1/SETD3/PAX5/PRDM5/PRDM2/KMT2B/SUV39…	76
GO:0003231	cardiac ventricle development	biological process	86/9065	119/17381	5.49275e-06	0.00010013	7.20728e-05	1.38567	MEF2C/HES1/ACVR1/GATA4/TPM1/CYR61/HAND2/SUFU/MED1/ZFPM2/JAG1/HIF1A/SMAD4/TGFBR2/NOTCH1/DNM2/BMPR2/MDM2/TGFBR1/NSD2/TGFBR3/SOX4/HEG1/LUZP1/WNT5A/FRS2/FGFR2/MYOCD/GATA3/HAND1/AP2B1/SALL1/PKP2/GSK3A/TGFB1/BMPR1A/FOXC1/PTK7/DCTN5/DSP/LRP2/RXRA/PRDM1/VANGL2/SMAD6/RBPJ/CHD7/SOX11/FKBP1A/NOG/FGFRL1/SMARCD3/SMAD7/ZFPM1/HEY2/CITED2/PAX8/TBX20/UBE4B/HEYL/ENG/NPRL3/NKX2-5/FOXH1/EGLN1/PITX2/FZD1/FZD2/TRIP11/…	86
GO:0021987	cerebral cortex development	biological process	81/9065	111/17381	5.51482e-06	0.000100184	7.21122e-05	1.39917	LRP1/NRP1/EGFR/PEX13/NF1/HIF1A/NTRK2/TRA2B/BTBD3/PAX6/CSNK2A1/BAX/SYNE2/ASPM/WDR62/TACC3/TACC1/SUN2/NDEL1/LRP8/BCL2A1/FLNA/FBXO45/CSNK2A2/CDH2/CEP120/LAMB1/NDE1/GART/CTNNB1/COL3A1/YWHAE/MDK/SLC38A2/TSC1/SUN1/SLC2A1/SMO/GNG12/SRGAP2/TRAPPC9/GSK3B/PAFAH1B1/DAB2IP/CDK5R1/FOXG1/SOCS7/TH/ROBO1/LRP6/GLI3/PTPRS/BBS4/FUT10/EMX1/ATIC/DISC1/PAX5/POU3F3/H2AFX/KIF14/EFHC1/MKKS/SRD5A1/NR2E1/RTN4/CNTNAP2/EMX2/…	81
GO:0009791	post-embryonic development	biological process	69/9065	92/17381	5.51954e-06	0.000100184	7.21122e-05	1.43803	BCL2/CHST11/SERP1/SOX6/ATM/KLF4/ITPR1/INPPL1/VEGFA/MECP2/HMGN1/ACVR2B/BCL2L11/SMAD2/TGFBR1/BAX/NPPC/HEG1/BCL11B/FBN1/FGFR2/C12orf57/GATA3/CCDC47/GNAS/KMT2A/MTOR/GIGYF2/ATRX/ASH1L/ABL1/TAPT1/AGO2/NR4A2/MORC3/DHCR7/PRDM1/PLEKHA1/ARID5B/SGPL1/PLAGL2/TIPARP/IGF2R/PYGO1/FZD5/EMX1/ZNF84/ERCC1/KDM5B/BAK1/SCUBE1/MFAP2/SCN9A/SLC18A2/GNAQ/IMPAD1/ACO1/GABRG2/CYP1A2/MUT/APOB/NKX2-3/ALDH5A1/SZT2/ATF5/PYGO2/TA…	69
GO:0034502	protein localization to chromosome	biological process	58/9065	75/17381	5.92124e-06	0.000107244	7.71939e-05	1.48277	ESR1/TTK/BRCA2/EZH2/RB1/HASPIN/NDC80/TERT/BUB1B/CDK1/CENPQ/CDCA5/CDT1/RPA2/TEX15/RCC2/HIST1H1B/CHAMP1/LRWD1/WAPL/TNKS/TRAPPC12/WRAP53/CCT5/ATRX/PLK1/CCT7/IK/NABP2/CCT4/CCT2/CCT6A/RUVBL2/TCP1/XRCC5/PINX1/AURKB/SETD2/CARM1/GNL3L/CENPA/TERF2IP/PARP3/RAD21/POT1/ESCO2/CTCF/TERF1/TERF2/SLF1/KNL1/SPIDR/LEMD2/MRNIP/SPDL1/TNKS2/HDAC8/RPA1	58
GO:1903321	negative regulation of protein modification by small protein conjugation or removal	biological process	105/9065	150/17381	5.99609e-06	0.000108367	7.80019e-05	1.34216	HSPA1A/SUFU/PRKCE/ANAPC16/N4BP1/OTUB1/UBE2C/CDC20/BUB1B/CDK1/FBXO5/SOX4/SPOPL/PSMD9/ISG15/BAG5/MAD2L1/NXN/PSME1/UBR5/CCNB1/GLMN/CAV1/UBA52/PSMD3/UBB/PSMB2/MTOR/ANAPC1/HSPA1B/PSMD4/CTNNB1/FZR1/PSMD11/U2AF2/PSMC1/GTPBP4/PARP10/PSMB3/PSMA7/PARK7/RPS3/DNAJA1/PSMC5/TRIP12/PSMD2/UBC/PSMD6/PSMC4/PSMD1/PSME3/PSMD7/PINX1/ABL1/UBXN1/RPL5/RPS7/PSMA2/ARRB1/PSMD8/PSMD13/CDK2/PSMC3/PRMT3/WNT1/HFE/OGT/UBE2D1/GN…	105
GO:0018210	peptidyl-threonine modification	biological process	89/9065	124/17381	6.03385e-06	0.000108584	7.81578e-05	1.37618	ACVR1/NLK/SPRED1/CHEK1/BCL2/TTK/MAP2K1/APP/PRKD2/CALM3/BMP7/CALM2/MAPK1/TGFBR2/TBK1/AKT1/LRRK2/CSNK2A1/TGFBR1/MAPK8/HASPIN/CDK1/TNKS1BP1/STK11/WNT5A/SPRED2/SPRY2/DMTN/CAD/EIF4G1/HIPK3/CAMK2G/CALM1/RIPK2/DYRK1A/AXIN1/HIPK2/TNKS/PDPK1/MTOR/PRKACA/GSK3A/TGFB1/SBK1/TRPC5/PLK1/PRKCA/WNK1/MARK2/UBE2K/CAMK2B/CLK1/ULK1/ACVR1B/STK33/GSK3B/DDIT4/GALNT1/PSKH1/CAB39/PRKCD/GRK2/CDK5R1/CHEK2/SMAD7/OSR1/S1PR2/W…	89
GO:2001251	negative regulation of chromosome organization	biological process	89/9065	124/17381	6.03385e-06	0.000108584	7.81578e-05	1.37618	DNMT1/H3F3B/DNMT3B/SET/TTK/BRCA1/ATM/MECP2/HNRNPU/SPI1/SIRT1/OTUB1/HMGA1/TRIP13/NDC80/BUB1B/TOP2A/CDT1/ESPL1/ASF1A/JARID2/SIN3A/DYNC1LI1/MAD2L1/CENPF/ZNF207/SMARCB1/NOC2L/CTBP1/HNRNPA1/UBR5/CCNB1/SRC/WAPL/TNKS/SKI/SLX4/HNRNPC/PHF8/ATRX/CTC1/PLK1/BCOR/IK/KDM3A/XRCC1/PARP1/EXOSC10/KLHL22/ATAD2/TRIP12/XRCC5/SMG6/PINX1/TPR/PTTG1/APC/PAPD5/NAA10/BUB1/DUSP1/KDM5A/GNL3L/BUB3/TERF2IP/RAD50/ERCC1/ZNF451/U…	89
GO:0055076	transition metal ion homeostasis	biological process	92/9065	129/17381	6.54065e-06	0.000117331	8.44543e-05	1.36743	S100A9/SOD1/SFXN1/PICALM/CAND1/AP3D1/APP/HMOX1/HIF1A/SMAD4/XIAP/ERFE/PRNP/SFXN2/TMC8/SLC30A7/SFXN5/FBXL5/SLC39A10/FTL/SLC39A14/ABCB6/ABCB7/ATP6V1A/SRI/CCDC22/SLC30A6/ARF1/MYC/UBA52/UBB/ATP6AP1/SKP1/EIF2AK1/ATP13A2/SCO1/SLC30A1/UBC/SLC39A8/SLC30A9/NCOA4/HMOX2/STEAP2/NDFIP1/SLC40A1/HFE/B2M/IREB2/NUBP1/ATP6V1G1/TFRC/SLC25A37/ATP7A/MT2A/SLC39A7/SLC31A1/ATOX1/ABCG2/CCDC115/FXN/SLC25A28/ATP6V0A2/SLC11A…	92
GO:0014033	neural crest cell differentiation	biological process	54/9065	69/17381	6.54781e-06	0.000117331	8.44543e-05	1.50055	MEF2C/HES1/ACVR1/ZEB2/NRP1/CORO1C/HAND2/EDN1/JAG1/ERBB4/BMP7/HIF1A/SMAD4/SOX9/MAPK3/MAPK1/SNAI2/EDNRA/LEF1/FOLR1/RDH10/PEF1/FRZB/TCOF1/TBX1/BMPR1A/EFNB1/FOXC1/ALDH1A2/CFL1/NOLC1/SMO/KLHL12/TAPT1/SFRP1/WNT10A/SOX11/LRP6/RET/TWIST1/LAMA5/SEMA3F/EDN3/KBTBD8/ALX1/PHOX2B/GDNF/PITX2/SHH/FGF19/PHACTR4/KITLG/SEMA3A/NRG1	54
GO:0045637	regulation of myeloid cell differentiation	biological process	160/9065	242/17381	6.61e-06	0.000118194	8.50754e-05	1.26769	MEF2C/FADD/FOXO3/TRAF6/H3F3B/JUN/CDK6/HOXA5/FOXP1/MAFB/RARG/THBS1/MOV10/ASH2L/HOXA9/HOXB8/HIST1H3B/HOXA7/MED1/EP300/ETS1/KLF10/LIF/CSF1/CREBBP/JAG1/NF1/FAS/HIF1A/SPI1/CREB1/HDAC1/RB1/TLR4/NFKBIA/IFNG/STAT3/FOS/RBFOX2/CEBPB/HMGB1/LEF1/RBBP5/SENP1/TJP2/AGO1/KMT2D/RNF41/CBFB/RASSF2/ACVR2A/TMEM64/IRF7/BGLAP/STAT1/ISG15/FBN1/HIST2H3A/SIN3A/DPY30/HIST2H3D/HIST2H3C/NR4A3/TNRC6A/GNAS/PURB/KMT2A/MYC/SETD1…	160
GO:1903844	regulation of cellular response to transforming growth factor beta stimulus	biological process	77/9065	105/17381	6.88479e-06	0.000122847	8.84243e-05	1.40607	HSPA1A/PPM1A/THBS1/SNX6/ZEB1/CHST11/CDKN1C/SMAD4/SIRT1/TGFBR2/DNM2/SMAD2/TGFBR1/PRDM16/DLX1/HSP90AB1/TGFBR3/STK11/MTMR4/RNF111/FBN1/CD109/LEMD3/MYOCD/ITGA3/FOLR1/CAV1/BCL9L/UBA52/ZNF703/UBB/HIPK2/BAMBI/PDPK1/SKI/TRIM33/FBN2/TGFB1/PEG10/SMAD3/SMURF1/UBC/HSPA5/WNT1/ONECUT2/SMAD6/SKIL/SDCBP/SOX11/SMAD7/PIN1/DKK3/ONECUT1/CITED2/SMURF2/GLG1/MEN1/WFIKKN2/ZNF451/RPS27A/ENG/ADAM17/FLCN/PMEPA1/NPNT/VASN/D…	77
GO:0072431	signal transduction involved in mitotic G1 DNA damage checkpoint	biological process	50/9065	63/17381	6.97766e-06	0.000123979	8.92391e-05	1.52173	PLK2/CDKN1A/E2F1/CENPJ/ATM/EP300/CNOT6/CDKN1B/TP53/MDM2/BAX/GADD45A/CDK1/PCNA/SOX4/TNKS1BP1/CNOT4/ZNF385A/SFN/CCNB1/UBA52/UBB/CNOT1/E2F8/NPM1/CASP2/CNOT8/CNOT9/RPL26/UBC/PRMT1/AURKA/CNOT6L/CDK2/E2F4/CNOT11/CARM1/BTG2/TFDP1/RBL2/ARID3A/MDM4/TFDP2/CHEK2/MUC1/RPS27A/E2F7/CNOT2/CRADD/TRIAP1	50
GO:1902400	intracellular signal transduction involved in G1 DNA damage checkpoint	biological process	50/9065	63/17381	6.97766e-06	0.000123979	8.92391e-05	1.52173	PLK2/CDKN1A/E2F1/CENPJ/ATM/EP300/CNOT6/CDKN1B/TP53/MDM2/BAX/GADD45A/CDK1/PCNA/SOX4/TNKS1BP1/CNOT4/ZNF385A/SFN/CCNB1/UBA52/UBB/CNOT1/E2F8/NPM1/CASP2/CNOT8/CNOT9/RPL26/UBC/PRMT1/AURKA/CNOT6L/CDK2/E2F4/CNOT11/CARM1/BTG2/TFDP1/RBL2/ARID3A/MDM4/TFDP2/CHEK2/MUC1/RPS27A/E2F7/CNOT2/CRADD/TRIAP1	50
GO:1903902	positive regulation of viral life cycle	biological process	46/9065	57/17381	7.07066e-06	0.000125366	9.0238e-05	1.54735	HACD3/PPIB/ADAR/NOTCH1/VAPA/DDX3X/DDB1/TOP2A/ADARB1/TSG101/IFIT1/LGALS1/NR5A2/PDE12/PPIA/CHMP2A/SMC3/LARP1/PABPC1/VPS4A/RAD23A/HSPA8/NUCKS1/PPIE/VAPB/VPS37B/SRPK1/TARBP2/FMR1/CHMP2B/CHMP4B/CCL5/STOM/STAU1/CD4/ZNF502/CHMP3/VPS4B/TRIM38/TRIM21/SRPK2/PKN2/CAV2/P4HB/CD28/TBC1D20	46
GO:0052312	modulation of transcription in other organism involved in symbiotic interaction	biological process	25/9065	27/17381	7.37697e-06	0.000130523	9.39495e-05	1.77535	NTRK3/JUN/EP300/HMGA2/HPN/HDAC1/LEF1/TARDBP/SMARCB1/SP1/RRP1B/SMARCA4/CHD1/NUCKS1/CTDP1/PSMC3/REST/CCL5/CCL3/TAF11/ZNF639/CCNT1/TFAP4/POU2F3/SNW1	25
GO:0030518	intracellular steroid hormone receptor signaling pathway	biological process	98/9065	139/17381	7.42981e-06	0.000131182	9.44241e-05	1.35182	ESR1/CCNE1/PAK1/FOXP1/ARID1A/BRCA1/DDX5/PIAS1/MED1/EP300/MED16/UBE2I/CLOCK/NRIP1/SIRT1/HDAC1/RB1/EGLN2/RBFOX2/NR6A1/KANK2/CRY2/NR3C1/KMT2D/CBFB/RAN/RNF6/YWHAH/MED4/PGR/CALR/UBR5/SRC/AXIN1/NCOA6/FKBP4/NCOA3/WBP2/DDX54/PAGR1/CNOT1/DDX17/CTNNB1/MED14/SMARCA4/PPARGC1A/KDM3A/RBM14/PARK7/CNOT9/PARP1/DNAJA1/PHB2/PPARGC1B/MED24/NCOA4/TADA3/MED13/MED12/SFRP1/NODAL/AR/YAP1/CARM1/RNF4/THRAP3/UFL1/MED30/HEYL…	98
GO:0043241	protein complex disassembly	biological process	178/9065	273/17381	7.568e-06	0.000133342	9.59791e-05	1.25016	STMN1/WNT3A/GAK/CCSAP/IGF1R/DVL2/TWF1/SNAPIN/TWF2/UVRAG/MRPL42/MRPS9/VAMP8/MRPL4/SMCR8/LIMA1/C12orf65/MID1IP1/GLE1/CAPZB/TSG101/FYCO1/CSNK1A1/CAPZA1/DMTN/MRPL19/F2RL1/CAPG/TMOD3/PLEKHH2/CHMP2A/APEH/IST1/KIF2C/CAV1/AXIN1/SH3GL1/MRPL46/PPP1CA/ARHGEF2/UBQLN4/MRPS16/DVL1/MRPS2/NCKAP5L/MRPL11/CTNNB1/FRAT1/VPS4A/HSPA8/MID1/MTPN/MRPS11/MRPL38/WASHC2C/MRPL39/MRPL53/PHF23/MRPS23/NSF/MRPL32/SPTBN1/SPTBN2/C…	178
GO:0008630	intrinsic apoptotic signaling pathway in response to DNA damage	biological process	75/9065	102/17381	7.67336e-06	0.000134635	9.69098e-05	1.40983	CDKN1A/E2F1/BCL2/MCL1/MSH2/BCL2L2/BRCA2/BRCA1/CASP9/ATM/EP300/HMOX1/TP53/SIRT1/BCL2L11/IKBKE/CD44/TP73/SNAI2/CXCL12/TAF9/BAX/EPHA2/MSH6/NACC2/TMEM109/ZNF385A/AEN/BCL2A1/SFN/RAD9A/HIPK2/CCAR2/BAG6/BCL2L12/HTRA2/MIF/CASP2/TPT1/RPS3/RPL26/TAF9B/CDIP1/CDKN2D/BOK/ABL1/FNIP2/DYRK2/BCL2L1/HIPK1/HNRNPK/USP28/TNF/DDIT4/TNFRSF1B/SKIL/HIC1/PIK3R1/CHEK2/MUC1/SNAI1/MLH1/BCL3/BAK1/PIAS4/PHLDA3/MOAP1/PYCARD/TRI…	75
GO:0030218	erythrocyte differentiation	biological process	75/9065	102/17381	7.67336e-06	0.000134635	9.69098e-05	1.40983	FOXO3/CDK6/HOXA5/MAFB/SFXN1/ADAR/G6PD/SOX6/MED1/VEGFA/ETS1/HIF1A/SPI1/SRF/SP3/RB1/STAT3/SMAD5/RBFOX2/SENP1/TGFBR3/ACVR2A/KIT/STAT1/ISG15/DMTN/TMOD3/GATA3/DNASE2/SETD1A/HIPK2/RPS6/RPS14/MAEA/NFE2L1/STAT5B/HSPA9/PTBP3/ATPIF1/PRMT1/CEBPG/ACVR1B/INHBA/CASP3/JMJD6/TAL1/BCL6/ZFP36L1/KLF13/B2M/THRA/ZFPM1/LYN/RPS19/LDB1/SLC11A2/KLF2/DYRK3/FLVCR1/EPAS1/ADD1/PKNOX1/MAPK14/HMGB2/TRIM10/JAK3/MPIG6B/ACIN1/NCK…	75
GO:2001235	positive regulation of apoptotic signaling pathway	biological process	121/9065	177/17381	7.88754e-06	0.000138106	9.94077e-05	1.31075	S100A9/TP53INP1/E2F1/FADD/BCL2/MCL1/SOD1/YWHAQ/THBS1/CTSC/TIMP3/FAF1/FBXW7/CYLD/PEA15/NF1/FAS/TP53/SIAH1/SIRT1/BCL2L11/BBC3/TP73/YWHAZ/PMAIP1/TGFBR1/MAPK8/BAX/NACC2/DYNLL2/SERINC3/YWHAH/PDIA3/SFN/RAD9A/CAV1/UBB/MAGED1/RACK1/NMT1/HTRA2/GSK3A/CTNNA1/PPP3R1/BCLAF1/PPP1R13B/CASP2/YWHAE/SFPQ/PARK7/RPS3/RPL26/SMAD3/PAK2/PTEN/ATPIF1/TNFRSF10B/ATF3/PLEKHF1/APOPT1/BOK/YWHAB/PDCD5/RPS7/INHBA/BCL2L1/SFRP1/S…	121
GO:0007163	establishment or maintenance of cell polarity	biological process	124/9065	182/17381	7.92938e-06	0.000138502	9.9693e-05	1.30634	HES1/CDX2/CDC42/WEE1/PDCD6IP/ROCK1/PAK1/SHTN1/LIN7C/CAP1/UST/RAB11FIP2/FSCN1/PTK2/MSN/SCRIB/ILK/TEK/PAX6/RHOA/SYNE2/NDC80/CYTH1/GBF1/CLIC4/NDEL1/MAP7/PDZD11/STK11/CKAP5/MPP5/RNF41/ERBIN/WNT5A/ARPC5/CDC42BPB/SPRY2/PARD6B/RAP1B/GOLPH3/FLOT2/PARVA/MYO18A/GATA3/KIF2C/RAB10/NDE1/ARHGEF2/RACK1/CTNNA1/MAP1B/ARFGEF1/HTT/MAP4/PTK7/MYH9/MARK2/CFL1/CDK5RAP2/SPRY1/SLC9A1/MARK3/CRB2/STK25/CAMSAP3/DLG3/ROCK2/V…	124
GO:0030879	mammary gland development	biological process	93/9065	131/17381	7.95952e-06	0.000138502	9.9693e-05	1.36119	WNT3A/AKT2/CCND1/ESR1/HOXA5/IQGAP3/BRCA2/NOTCH4/MED1/VEGFA/UMPS/CSF1/DDR1/ERBB4/HIF1A/SOX9/CREB1/PTCH1/HK2/BCL2L11/MAPK1/SCRIB/IGFBP5/TGFBR2/MGMT/AKT1/CEBPB/BAX/LEF1/EPHA2/BTRC/WNT5A/PGR/FGFR2/CAPN1/GPAT4/OXTR/SLC29A1/B4GALT1/GLI2/GATA3/ARG1/SRC/CAV1/ZNF703/FASN/TGFB1/TBX2/XBP1/GPX1/PHB2/STAT5B/APRT/NEURL1/SMO/RREB1/AR/ATP7A/ITGA2/ID2/ROBO1/STAT5A/WNT2/GLI3/STAT6/ARHGAP5/HOXD9/CCL11/EGF/DHODH/NTN…	93
GO:0060968	regulation of gene silencing	biological process	93/9065	131/17381	7.95952e-06	0.000138502	9.9693e-05	1.36119	DNMT1/ESR1/H3F3B/UHRF1/EGFR/POLR2K/HIST1H3B/POM121/DDX5/ADAR/MAP2K1/NCOR2/SIRT1/HMGA1/STAT3/NDC1/POLR2D/NUP58/TERT/MYCN/AGO1/ASF1A/RAN/NUP62/HIST2H3A/SIN3A/IPO8/NUP50/EIF4G1/POM121C/POLR2I/NUP160/NUP210/HIST2H3D/HIST2H3C/MIER1/TNRC6A/HIST1H3D/NUP153/POLR2A/POLR2L/TRIM28/PHF8/TGFB1/POLR2B/CDC45/LIMD1/RANBP2/HIST2H4B/HIST1H4E/XPO5/POLR2C/NUP214/AAAS/NUP37/HIST1H3H/ATAD2/PUM1/SETDB1/TPR/POLR2F/NUPL2…	93
GO:0001892	embryonic placenta development	biological process	68/9065	91/17381	8.01441e-06	0.00013917	0.000100174	1.43276	HES1/CDX2/CEBPA/GRB2/EGFR/CYR61/MAP2K1/MED1/CDKN1C/LIF/JUNB/IGF2/BMP7/HIF1A/SP3/MAPK1/AKT1/CEBPB/KRT19/PHLDA2/LEF1/NSDHL/TMED2/FGFR2/ZNF568/HAND1/TRIM28/BPTF/E2F8/STK3/SETD2/NODAL/PRDM1/ZFP36L1/STK4/RBPJ/DNAJB6/SNAI1/WNT2/ADM/PKD1/ASCL2/HEY2/FZD5/WNT7B/VASH1/SOCS3/NR2F2/PDGFB/GCM2/KRT8/EPAS1/E2F7/EGLN1/SPINT2/FBXW8/VASH2/CASP8/HEY1/BIRC6/NCOA1/HS6ST1/GCM1/PLCD3/GATA2/PLCD1/MDFI/GRHL2	68
GO:0031330	negative regulation of cellular catabolic process	biological process	140/9065	209/17381	8.72238e-06	0.000151152	0.000108798	1.28437	MET/GATA4/E2F1/BCL2/MCL1/ANXA2/SUFU/TIMP3/MAPK7/WDR6/HNRNPD/HMOX1/HNRNPU/FHIT/N4BP1/TIMP2/PIK3CG/AKT1/LRRK2/TAF9/HSP90AB1/SENP1/SMCR8/EPHA4/RNF41/TARDBP/BAG5/ATP2B4/NOP53/SMARCC1/EIF4G1/RGN/PTPN22/UBAC2/DFFA/IGF2BP1/YBX1/ATG7/DHX34/CCAR2/BAG6/PAIP1/LARP1/SECISBP2/UBQLN4/MTOR/HNRNPC/HTRA2/TSC2/GSK3A/PABPC1/HERC1/EIF4G2/PHF23/LARS/SNRNP70/PARK7/TIGAR/ATP13A2/TSC1/YBX3/SCO1/MAPKAPK2/HNRNPA0/DERL2/CL…	140
GO:0071158	positive regulation of cell cycle arrest	biological process	66/9065	88/17381	8.79752e-06	0.000152141	0.00010951	1.43803	GATA6/PLK2/CDKN1A/E2F1/CENPJ/BRCA1/ATM/EP300/HMGA2/CNOT6/CDKN1B/TP53/TP73/MDM2/BAX/GADD45A/CDK1/PCNA/SOX4/TNKS1BP1/CNOT4/ZNF385A/SFN/CCNB1/UBA52/UBB/PRKACA/CNOT1/TGFB1/E2F8/NPM1/CASP2/CNOT8/CNOT9/RPL26/MYBBP1A/UBC/MED25/PRMT1/AURKA/CNOT6L/CDK2/E2F4/CNOT11/CARM1/BTG2/TFDP1/RBL2/ARID3A/DAB2IP/MDM4/CDK5R1/TFDP2/ID2/CHEK2/MUC1/FOXO4/RRP8/RPS27A/CRLF3/E2F7/CNOT2/CRADD/TRIAP1/RPL23/POU4F1	66
GO:0007219	Notch signaling pathway	biological process	116/9065	169/17381	8.95748e-06	0.00015459	0.000111273	1.31607	HES1/CEBPA/NOTCH3/CDK6/NOTCH2/NOTCH4/EP300/FBXW7/APP/CREBBP/CDKN1B/JAG1/BMP7/SOX9/EGFL7/NFKBIA/TGFBR2/NOTCH1/STAT3/SNAI2/CD46/DLX1/KRT19/SPEN/HHEX/HIF1AN/KIT/NKAP/DTX1/PDCD10/YTHDF2/POFUT1/DLK1/RITA1/MYC/UBA52/UBB/EPN1/TGFB1/TBX2/MDK/FOXC1/MIB1/NRARP/WDR12/DLX2/ITCH/UBC/NEURL1/ARRB1/SYNJ2BP/MAML1/WNT1/BCL6/NUMB/CHAC1/KAT2B/RBPJ/IL6ST/AAK1/IFT74/MMP14/NCSTN/SNAI1/PERP/CDH6/HEY2/SUSD5/ONECUT1/RPS19…	116
GO:0018105	peptidyl-serine phosphorylation	biological process	187/9065	289/17381	9.20711e-06	0.000158573	0.00011414	1.24065	DRD1/NTRK3/NLK/WNT3A/CDC42/PLK2/AKT2/BCL2/CREBL2/PAK1/PWP1/EGFR/TTK/INPP5F/UHMK1/ATM/AKT3/VEGFA/PRKCE/HMGA2/MAPK7/IKBKB/APP/PRKD2/LIF/RPS6KA5/CHUK/IL24/MAPK3/MAPK1/NTRK2/IKBKE/ILK/PTGS2/CD44/TGFBR2/IFNG/TBK1/NTF3/AKT1/LRRK2/TGFBR1/MAPK8/BAX/CDK1/PKN3/IL6/TNKS1BP1/CSNK1G1/PRKAA1/STK11/RASSF2/WNT5A/CSNK1A1/FNIP1/SPRY2/DMTN/SGK3/ATP2B4/DKK1/IL11/EIF4G1/PDCD10/PRKG2/HIPK3/MAST4/CAMK2G/RIPK2/CCNB1/SRC…	187
GO:0070534	protein K63-linked ubiquitination	biological process	37/9065	44/17381	9.24067e-06	0.000158826	0.000114322	1.61234	TRAF6/OTUB1/PTPN22/UBR5/UBE2O/UBE2N/PARP10/TRIM27/RNF168/PRPF19/RNF115/TRIP12/ITCH/ARIH2/UBE2E3/UBE2E2/UBE2G1/RNF4/UBE2V1/ZFP91/RNF152/UBE2S/UBE2B/RNF126/WWP2/TRAF2/TRIM56/PRKN/MAGEL2/UBE2D4/SASH1/RNF8/PELI3/UBE2V2/PLAA/BFAR/NOD2	37
GO:0001667	ameboidal-type cell migration	biological process	224/9065	353/17381	9.75921e-06	0.000167073	0.000120258	1.21669	MET/ACVR1/SPRED1/ANLN/ZEB2/JUN/PAK1/FOXP1/RHOB/THBS1/NRP1/CORO1C/HAND2/TMSB4X/EPB41L4B/SDC4/CAP1/TAC1/KLF4/FGFR1/VEGFA/PRKCE/ETS1/FGF2/PTK2/PRKD2/MEOX2/MTA2/EDN1/NF1/ACVR1C/ERBB4/BMP7/HIF1A/PPARG/FGF7/SRF/SOX9/KDR/ILK/PTGS2/SLC8A1/TGFBR2/TEK/IFNG/NOTCH1/BMPR2/AKT1/PFN1/WASF2/ADAM9/RHOA/TGFBR1/EPPK1/SYNE2/HMGB1/LEF1/ATOH8/EPHA2/ATP5B/PKN3/NRP2/PTPRG/RAB11A/WNT5A/KIT/PTPRR/ITGB2/RCC2/DMTN/CALR/PDCD…	224
GO:1905477	positive regulation of protein localization to membrane	biological process	81/9065	112/17381	9.76014e-06	0.000167073	0.000120258	1.38667	WNT3A/AKT2/E2F1/BCL2/PAK1/LRP1/YWHAQ/EGFR/RAB11FIP2/PRKCE/AGR2/LRP4/TP53/ERBB2/BCL2L11/TP73/IFNG/YWHAZ/PMAIP1/AKT1/MAPK8/EPHA2/PRNP/DYNLL2/YWHAH/RAB11A/MESD/KIF5B/PLS1/ITGA3/CCL2/SFN/MIEF1/ITGB1/PDPK1/RACK1/NMT1/TGFB1/PPP3R1/PPP1R13B/YWHAE/SPTBN1/TCAF1/YWHAB/PDCD5/EZR/C2CD5/TFDP1/ARF6/SQSTM1/YWHAG/CDK5R1/TFDP2/PIK3R1/RER1/CNST/FYN/BMF/MTCL1/PRKCH/ACSL3/STOM/WNK3/MFF/EPHB2/DYNLL1/MYO1C/NKD2/KCNJ11…	81
GO:0036498	IRE1-mediated unfolded protein response	biological process	53/9065	68/17381	9.9151e-06	0.000169038	0.000121673	1.49442	HSPA1A/SERP1/AGR2/TSPYL2/BCL2L11/BAX/HYOU1/SEC31A/CTDSP2/SEC61A1/TMEM33/SHC1/SEC61B/ACADVL/SEC62/PTPN1/SSR1/PDIA6/TLN1/DDX11/GSK3A/XBP1/SRPRA/HDGF/CXXC1/TMBIM6/SEC61A2/EXTL3/COPS5/SYVN1/PREB/SEC63/SEC61G/HSPA5/ERN1/EDEM1/DNAJB9/DAB2IP/SRPRB/DNAJC3/TPP1/PDIA5/KLHDC3/BAK1/ADD1/ATP6V0D1/FKBP14/GFPT1/GOSR2/BFAR/LMNA/ASNA1/MYDGF	53
GO:0072395	signal transduction involved in cell cycle checkpoint	biological process	53/9065	68/17381	9.9151e-06	0.000169038	0.000121673	1.49442	PLK2/CDKN1A/E2F1/CENPJ/ATM/EP300/CNOT6/CDKN1B/TP53/MDM2/BAX/GADD45A/CDK1/PCNA/SOX4/TNKS1BP1/CNOT4/ZNF385A/SFN/CCNB1/UBA52/UBB/CNOT1/CDC5L/E2F8/NPM1/CASP2/CNOT8/CNOT9/PRPF19/RPL26/UBC/PRMT1/AURKA/CNOT6L/CDK2/E2F4/CNOT11/CARM1/BTG2/TFDP1/RBL2/ARID3A/MDM4/SOX11/TFDP2/CHEK2/MUC1/RPS27A/E2F7/CNOT2/CRADD/TRIAP1	53
GO:0046782	regulation of viral transcription	biological process	51/9065	65/17381	1.03583e-05	0.000175528	0.000126344	1.5044	CDK9/JUN/POLR2K/NELFCD/EP300/HMGA2/HPN/HDAC1/PFN1/POLR2D/LEF1/RSF1/TARDBP/IFITM3/SMARCB1/POLR2I/SP1/POLR2A/POLR2L/NELFE/RRP1B/POLR2B/SMARCA4/CHD1/TRIM27/SUPT5H/NUCKS1/POLR2C/CTDP1/POLR2F/PSMC3/TARBP2/REST/MDFIC/TRIM8/CCL5/CCL3/TAF11/TRIM13/GTF2F1/ZNF639/CCNT1/TRIM31/POLR2E/GTF2B/TFAP4/TRIM21/POU2F3/SUPT4H1/ZFP36/SNW1	51
GO:0048864	stem cell development	biological process	51/9065	65/17381	1.03583e-05	0.000175528	0.000126344	1.5044	HES1/ACVR1/ZEB2/NRP1/CORO1C/HAND2/EDN1/JAG1/ERBB4/BMP7/HIF1A/SOX9/MAPK3/MAPK1/SNAI2/EDNRA/LEF1/FOLR1/RDH10/PEF1/TCOF1/TBX1/BMPR1A/EFNB1/FOXC1/ALDH1A2/CFL1/NOLC1/SMO/KLHL12/TAPT1/SETD2/SOX11/RET/TWIST1/LAMA5/SEMA3F/EDN3/KBTBD8/ALX1/WNT7A/PHOX2B/MSI2/GDNF/PITX2/SHH/FGF19/PHACTR4/KITLG/SEMA3A/NRG1	51
GO:1902117	positive regulation of organelle assembly	biological process	51/9065	65/17381	1.03583e-05	0.000175528	0.000126344	1.5044	PDCD6IP/SDC4/FSCN1/CNOT6/EDN1/MSN/SDC1/CCP110/PIP4K2C/ATMIN/SEPT7/PIP4K2B/NUP62/RALB/LCP1/CEP295/SRC/PAN3/CEP120/CNOT1/DYNC1H1/HTT/PIP4K2A/TAPT1/SEPT9/ULK1/CNOT6L/TNF/SDCBP/SH3GLB1/BECN1/BBS4/ASAP1/RAB3GAP1/MAPK9/DYNLL1/CCDC88A/CNOT2/ARHGAP35/VPS4B/MYLK3/ARHGEF5/BMP10/RAB3GAP2/CEP135/PROX1/GPSM2/LRSAM1/IL5/NUMA1/KIAA1324	51
GO:0031669	cellular response to nutrient levels	biological process	126/9065	186/17381	1.04494e-05	0.000176716	0.000127199	1.29887	UCP2/CDKN1A/BCL2/JUN/FOXO1/EHMT2/MED1/KLF10/COL1A1/PIM1/WNT9B/HMOX1/FAS/TP53/PPARG/SRF/MAPK3/SIRT1/MAPK1/PMAIP1/BMPR2/LRRK2/SNAI2/MDM2/MAPK8/SESN2/MAX/KANK2/IL6/PRKAA1/GLUL/FNIP1/BGLAP/STK24/USP33/RALB/FADS1/FOLR1/TRIM24/HNRNPA1/ATG7/SREBF1/MTOR/XBP1/HSPA8/RIPOR1/USF1/LARS/SLC38A2/MARS/TSC1/MYBBP1A/SLC2A1/CLEC16A/DEPDC5/ATF3/AMBRA1/SREBF2/ATF4/BRIP1/TXN2/ULK1/FBXO22/PRKAA2/SFRP1/HSPA5/HFE/ICAM1/C…	126
GO:1901888	regulation of cell junction assembly	biological process	62/9065	82/17381	1.04902e-05	0.000177051	0.00012744	1.44972	ROCK1/THBS1/NRP1/CORO1C/GJA1/SDC4/VEGFA/IKBKB/PTK2/TJP1/KDR/TEK/RAP1A/SNAI2/RHOA/LIMS1/CBFB/DLC1/RCC2/DMTN/RAP1B/PHLDB2/RAPGEF2/THY1/SRC/CAV1/PRKACA/PKP2/TSC1/SMAD3/PTEN/RAPGEF1/IQGAP1/SLC9A1/ABL1/CAMSAP3/PPM1F/FLOT1/SFRP1/RAC1/TNF/ROCK2/PTPRJ/OCLN/MMP14/SNAI1/PRKCH/FMN1/GREM1/FZD5/LDB1/MYO1C/CLASP1/CLDN1/RUNX1/EFNA5/GPM6B/WNT4/WDPCP/NPHP1/ACVRL1/BCAS3	62
GO:0018107	peptidyl-threonine phosphorylation	biological process	84/9065	117/17381	1.07285e-05	0.000180711	0.000130075	1.37658	ACVR1/NLK/SPRED1/CHEK1/BCL2/TTK/MAP2K1/APP/PRKD2/CALM3/BMP7/CALM2/MAPK1/TGFBR2/TBK1/AKT1/LRRK2/CSNK2A1/TGFBR1/MAPK8/HASPIN/CDK1/TNKS1BP1/STK11/WNT5A/SPRED2/SPRY2/DMTN/CAD/EIF4G1/HIPK3/CAMK2G/CALM1/RIPK2/DYRK1A/AXIN1/HIPK2/TNKS/PDPK1/MTOR/PRKACA/GSK3A/TGFB1/SBK1/TRPC5/PLK1/PRKCA/WNK1/MARK2/UBE2K/CAMK2B/CLK1/ULK1/ACVR1B/STK33/GSK3B/DDIT4/PSKH1/CAB39/PRKCD/GRK2/CDK5R1/CHEK2/SMAD7/OSR1/S1PR2/WNK3/CAM…	84
GO:0035601	protein deacylation	biological process	79/9065	109/17381	1.09792e-05	0.000184157	0.000132555	1.38966	SPRED1/HDAC4/VEGFA/EP300/RCOR1/PRKD2/MTA2/TP53/SIRT1/HDAC1/IFNG/LRRK2/MAPK8/RBBP7/NIPBL/CHD4/NACC2/ARID4B/SPRED2/SIN3A/ABHD12/HDAC2/CTBP1/MIER1/DYRK1A/SMARCAD1/CCAR2/SKI/SREBF1/SALL1/TGFB1/MSL3/SFPQ/AKAP8/RBM14/SAP18/AKAP8L/TADA3/SIN3B/SUDS3/BRMS1L/BCL6/MTA1/KDM5A/ABHD17C/ELK4/LYPLAL1/REST/SIRT4/HDAC7/LYPLA2/MORF4L2/TBL1XR1/BAZ2A/HDAC5/PER1/PRDM5/ABHD17B/MORF4L1/FRY/SDR16C5/HDAC9/TBL1X/MTA3/SAP30…	79
GO:0042177	negative regulation of protein catabolic process	biological process	79/9065	109/17381	1.09792e-05	0.000184157	0.000132555	1.38966	EGFR/ANXA2/SUFU/TIMP3/FHIT/N4BP1/TIMP2/TAF9/HSP90AB1/SENP1/SNX12/EPHA4/BAG5/MAD2L1/NOP53/SMARCC1/FLNA/UBAC2/CCAR2/BAG6/SNRNP70/PARK7/ATP13A2/SF3B3/SMAD3/SCO1/DERL2/CLEC16A/VPS35/UBXN1/SERPINE2/RPL5/RPS7/USP19/CTSA/RGP1/USP25/EFNA1/WNT1/HFE/WAC/YOD1/DAB2IP/MDM4/SDCBP/LAPTM4B/ALAD/FYN/PIN1/AZIN1/INS/USP14/RYBP/PSMF1/LRIG2/GRIN2A/FURIN/TRIM39/TLK2/IRAK3/UBE2G2/BANP/FMN2/SNX3/OPHN1/ATRAID/SVIP/SHH/PT…	79
GO:0048754	branching morphogenesis of an epithelial tube	biological process	103/9065	148/17381	1.09987e-05	0.000184157	0.000132555	1.33439	MET/ACVR1/KRAS/ESR1/BCL2/WT1/HOXA5/PAK1/NRP1/NOTCH4/MED1/VEGFA/FGF2/HOXB7/CSF1/DDR1/WNT9B/EDN1/BMP7/SRF/SMAD4/SOX9/PTCH1/ILK/TGFBR2/NOTCH1/EDNRA/LEF1/EPHA2/SIX1/CLIC4/BTRC/MYCN/HHEX/SIX4/WNT5A/PGR/SPRY2/FGFR2/B4GALT1/GLI2/GNA13/SRC/LGR4/RDH10/TIMELESS/MYC/MAGED1/SALL1/HOXD11/CTNNBIP1/CTNNB1/TGFB1/PLXND1/COL4A1/NRARP/PHB2/SPRY1/SMO/ABL1/GDF7/WNT1/AR/TNF/VANGL2/STK4/NOG/MMP14/WNT2B/WNT2/GLI3/PKD1/G…	103
GO:1901185	negative regulation of ERBB signaling pathway	biological process	45/9065	56/17381	1.10346e-05	0.000184392	0.000132724	1.54075	PTPN12/CDC42/GRB2/SNX6/EGFR/ERBB3/HGS/ERBB2/ERBB4/ERRFI1/SOCS4/TSG101/NUP62/SPRY2/BTC/ITGA1/UBA52/UBB/STAM2/EPN1/RNF115/UBC/SPRY1/RAB7A/CBL/PTPRJ/DAB2IP/GPRC5A/SOCS5/STAM/EREG/EPS15L1/NRG4/EGF/RPS27A/RNF126/PTPN3/NRG2/SH3KBP1/HBEGF/CBLB/EPS15/NRG1/PTPN18/PTPN2	45
GO:1901988	negative regulation of cell cycle phase transition	biological process	155/9065	235/17381	1.11842e-05	0.000186522	0.000134257	1.26465	PLK2/CCND1/CDKN1A/E2F1/BCL2/CENPJ/TTK/BRCA1/ATM/EP300/HMGA2/EZH2/CNOT6/CDKN1B/TP53/BRD7/RB1/TP73/MDM2/ZFP36L2/BAX/GADD45A/DONSON/FANCI/TRIP13/NDC80/BUB1B/CTDSP2/CDK1/TICRR/PCNA/CDT1/KANK2/BLM/SOX4/NACC2/RPA2/TNKS1BP1/PSMD9/CNOT4/ZNF385A/DYNC1LI1/MRE11/MAD2L1/NOP53/CENPF/ZNF207/PSME1/SFN/CCNB1/UBA52/PSMD3/UBB/PSMB2/CNOT1/PSMD4/PSMD11/VPS4A/GIGYF2/SKP1/JADE1/SMARCA4/PSMC1/E2F8/PLK1/NPM1/CASP2/FBXO3…	155
GO:1901030	positive regulation of mitochondrial outer membrane permeabilization involved in apoptotic signaling pathway	biological process	32/9065	37/17381	1.14561e-05	0.000190679	0.00013725	1.65827	E2F1/BCL2/YWHAQ/TP53/BCL2L11/TP73/YWHAZ/PMAIP1/MAPK8/BAX/DYNLL2/YWHAH/SFN/NMT1/GSK3A/PPP3R1/PPP1R13B/YWHAE/ATPIF1/BOK/YWHAB/GSK3B/TFDP1/YWHAG/TFDP2/BMF/HIP1R/DYNLL1/BAK1/BID/TP63/CASP8	32
GO:0050686	negative regulation of mRNA processing	biological process	27/9065	30/17381	1.14867e-05	0.000190811	0.000137345	1.72564	CDK9/PTBP1/SRSF9/TRA2B/SRSF7/BARD1/SRSF6/RBM42/SRSF4/DYRK1A/NELFE/U2AF2/RNPS1/NPM1/SUPT5H/SAP18/RNF40/C1QBP/TMBIM6/RBMX/HNRNPA2B1/HNRNPK/RNF20/CCNT1/SRSF10/ZC3H14/CELF4	27
GO:0048706	embryonic skeletal system development	biological process	87/9065	122/17381	1.16276e-05	0.000192771	0.000138756	1.36731	MEF2C/HOXA5/HOXD10/HOXB8/ZEB1/CHST11/HOXA7/COL1A1/HOXB7/WNT9B/BMP7/PDGFRA/SP3/FGF9/TGFBR2/RUNX2/SMAD2/TGFBR1/NIPBL/DLX1/SIX1/SULF2/MTHFD1/MYCN/WDR60/HOXA3/SIX4/HOXB5/ACVR2A/WNT5A/FGFR2/SLC39A3/RDH10/AXIN1/GNAS/HOXC11/SATB2/MTHFD1L/TBX1/CTNNB1/NDST1/SMAD3/MEGF8/DLX2/EIF4A3/TAPT1/MED12/SETD2/NODAL/SOX11/NOG/MMP14/GLI3/OSR1/MYF5/HOXD1/HOXD9/HOXA1/EXT1/IHH/DMRT2/TWIST1/TFAP2A/PAX5/HOXD3/FLVCR1/HOXC6/…	87
GO:0034599	cellular response to oxidative stress	biological process	183/9065	283/17381	1.2101e-05	0.000200226	0.000144121	1.23986	MET/MYB/TP53INP1/FOXO3/ANXA1/BCL2/HSPA1A/JUN/MCL1/SOD1/SOD2/FOXO1/RHOB/TPM1/EGFR/AXL/GCH1/G6PD/CRK/KLF4/MAPK7/SRXN1/ETS1/EZH2/FBXW7/CCNA2/HNRNPD/PRODH/HMOX1/CHUK/TP53/BMP7/HIF1A/MAPK3/PDGFRA/SIRT1/MAPK1/TLR4/FBLN5/MGMT/FOS/PTPRK/DNM2/AKT1/LRRK2/MDM2/MAPK8/PRDX3/GJB2/DHFRP1/ECT2/MELK/SESN2/CDK1/PCNA/FANCD2/IL6/PRKAA1/PSAP/TXNRD1/KDM6B/GSTP1/STK24/SIN3A/BAG5/HDAC2/RGN/PDCD10/ZNF622/PRDX2/ARG1/SRC/N…	183
GO:0043470	regulation of carbohydrate catabolic process	biological process	58/9065	76/17381	1.2298e-05	0.000203085	0.000146179	1.46326	HDAC4/IGF1/POM121/P2RX7/PPARA/HIF1A/STAT3/NDC1/HMGB1/NUP58/PRKAA1/NUP62/NUP50/POM121C/PRKAG1/NUP160/NUP210/NUP153/GSK3A/RANBP2/PPARGC1A/PPP1CB/PGAM1/PFKFB4/TIGAR/NUP214/AAAS/NUP37/BPGM/TPR/NUPL2/PRKAA2/NUP98/NUP43/DDIT4/PPP1R3D/OGT/PFKFB2/INS/NUP205/NUP155/SEH1L/PGAM4/PHKG2/NUP54/INSR/EIF6/NUP93/ESRRB/ENTPD5/PPP1R3B/NUP188/MLXIPL/NUP85/CBFA2T3/NUP35/GCK/PFKFB3	58
GO:0043921	modulation by host of viral transcription	biological process	24/9065	26/17381	1.31555e-05	0.000216337	0.000155718	1.76988	JUN/EP300/HMGA2/HPN/HDAC1/LEF1/TARDBP/SMARCB1/SP1/RRP1B/SMARCA4/CHD1/NUCKS1/CTDP1/PSMC3/REST/CCL5/CCL3/TAF11/ZNF639/CCNT1/TFAP4/POU2F3/SNW1	24
GO:0052472	modulation by host of symbiont transcription	biological process	24/9065	26/17381	1.31555e-05	0.000216337	0.000155718	1.76988	JUN/EP300/HMGA2/HPN/HDAC1/LEF1/TARDBP/SMARCB1/SP1/RRP1B/SMARCA4/CHD1/NUCKS1/CTDP1/PSMC3/REST/CCL5/CCL3/TAF11/ZNF639/CCNT1/TFAP4/POU2F3/SNW1	24
GO:0003158	endothelium development	biological process	85/9065	119/17381	1.31775e-05	0.000216337	0.000155718	1.36955	MET/ACVR1/ROCK1/FOXP1/RHOB/NRP1/GJA1/ZEB1/NOTCH4/IKBKB/PRKD2/TJP1/JAG1/SMAD4/ACVR2B/MSN/KDR/NOTCH1/RAP1A/BMPR2/PDPN/RHOA/ATOH8/APOLD1/TJP2/CLIC4/RAP2C/HEG1/HOXB5/KDM6B/RAP1B/F2RL1/RAPGEF2/EDF1/F11R/PLOD3/CTNNB1/GSTM3/GPX1/RAPGEF1/RDX/EZR/SLC40A1/ICAM1/TNF/ROCK2/ARHGEF26/RBPJ/MARVELD2/S1PR1/PTPRS/S1PR2/PROX2/HEY2/MYADM/S1PR3/WNT7B/PPP1R16B/PDE4D/NR2F2/LAMA5/ENG/CLDN1/BTG1/STARD13/ADD1/TMEM100/SCUB…	85
GO:0140056	organelle localization by membrane tethering	biological process	107/9065	155/17381	1.32707e-05	0.000217444	0.000156515	1.32361	ACTR1A/CENPJ/CEP63/SSNA1/TUBA1A/USO1/VPS45/ALMS1/MAPRE1/CFTR/CCP110/PCNT/CDK1/CEP41/VAMP8/HAUS8/CKAP5/RAB11A/RABEPK/RALB/SFI1/EXOC2/SYTL2/STXBP3/RAB10/TUBB/HSP90AA1/NDE1/PRKACA/STX16/DYNC1H1/PLK1/CEP57/RAB26/YWHAE/CEP152/STX7/TUBG1/CDK5RAP2/TCTN1/VPS18/VPS11/EXOC6B/TUBB4B/SCFD1/CEP192/RAB3IP/HAUS6/RAB8B/PAFAH1B1/VAMP3/CSNK1E/YWHAG/BLOC1S6/SNAP25/STXBP2/EXOC5/VPS33A/CEP162/UNC13A/STX6/RAB15/CEP97/…	107
GO:0034446	substrate adhesion-dependent cell spreading	biological process	63/9065	84/17381	1.40326e-05	0.000229481	0.000165179	1.43803	CDC42/NRP1/CORO1C/AXL/PREX1/CRK/FN1/PTK2/FERMT2/CRKL/MERTK/ILK/TEK/LAMC1/DNM2/PDPN/LIMS1/RCC2/DMTN/UNC13D/CALR/ACTN4/FLNA/PARVA/SRC/ITGAV/LAMB1/BRAF/FER/WASHC2C/ABL1/C1QBP/SRGAP2/FBLN1/RREB1/EFNA1/RAC1/SRCIN1/FZD4/VAMP3/BVES/RAC3/HAS2/FZD7/MYADM/MELTF/LAMA5/KIF14/RAB1A/FGB/EFNA5/EPHB3/EPHA1/KANK1/RADIL/ANTXR1/AKIP1/ARPC2/ITGB3/TRIOBP/TYRO3/PEAK1/APOA1	63
GO:0072401	signal transduction involved in DNA integrity checkpoint	biological process	52/9065	67/17381	1.49565e-05	0.00024334	0.000175154	1.48811	PLK2/CDKN1A/E2F1/CENPJ/ATM/EP300/CNOT6/CDKN1B/TP53/MDM2/BAX/GADD45A/CDK1/PCNA/SOX4/TNKS1BP1/CNOT4/ZNF385A/SFN/CCNB1/UBA52/UBB/CNOT1/CDC5L/E2F8/NPM1/CASP2/CNOT8/CNOT9/PRPF19/RPL26/UBC/PRMT1/AURKA/CNOT6L/CDK2/E2F4/CNOT11/CARM1/BTG2/TFDP1/RBL2/ARID3A/MDM4/TFDP2/CHEK2/MUC1/RPS27A/E2F7/CNOT2/CRADD/TRIAP1	52
GO:0072422	signal transduction involved in DNA damage checkpoint	biological process	52/9065	67/17381	1.49565e-05	0.00024334	0.000175154	1.48811	PLK2/CDKN1A/E2F1/CENPJ/ATM/EP300/CNOT6/CDKN1B/TP53/MDM2/BAX/GADD45A/CDK1/PCNA/SOX4/TNKS1BP1/CNOT4/ZNF385A/SFN/CCNB1/UBA52/UBB/CNOT1/CDC5L/E2F8/NPM1/CASP2/CNOT8/CNOT9/PRPF19/RPL26/UBC/PRMT1/AURKA/CNOT6L/CDK2/E2F4/CNOT11/CARM1/BTG2/TFDP1/RBL2/ARID3A/MDM4/TFDP2/CHEK2/MUC1/RPS27A/E2F7/CNOT2/CRADD/TRIAP1	52
GO:0048588	developmental cell growth	biological process	135/9065	202/17381	1.49667e-05	0.00024334	0.000175154	1.28141	NTRK3/WNT3A/GATA4/ZEB2/RAB21/PAK1/RARG/NRP1/IGF1/SHTN1/BDNF/G6PD/VEGFA/CPNE6/APP/FN1/DDR1/EDN1/TWF2/SRF/SOX9/ILK/TGFBR2/DNM2/BMPR2/CXCL12/NRP2/NDEL1/KMT2D/STK11/SPART/RNF6/RAB11A/WNT5A/SPP1/RIMS2/PLXNA4/CDH4/CTTN/IST1/SEMA4D/L1CAM/BCL11A/EPHA7/ITGB1/ITSN2/TTL/VCL/MTOR/TIAM1/DVL1/MEX3C/GSK3A/CTNNB1/MAP1B/TRPC5/SYT4/SLIT1/SLC9A6/RASAL1/CYFIP1/CTDP1/ZFYVE27/WDR36/MEGF8/SMURF1/IQGAP1/ARIH2/ABL1/AURKA…	135
GO:0032885	regulation of polysaccharide biosynthetic process	biological process	29/9065	33/17381	1.55286e-05	0.000251503	0.00018103	1.68497	AKT2/IGF1/IRS1/NFKB1/IGF2/AKT1/C1QTNF2/CLTC/EPM2AIP1/MTOR/GSK3A/TGFB1/PPP1CB/AP2A1/DYRK2/GSK3B/PPP1R3D/HAS2/INS/EGF/PDGFB/INSR/SELENOS/ESRRB/PPP1R3B/ENPP1/IRS2/PPP1R3F/GCK	29
GO:0043276	anoikis	biological process	29/9065	33/17381	1.55286e-05	0.000251503	0.00018103	1.68497	E2F1/BCL2/MCL1/PTK2/NTRK2/NOTCH1/AKT1/SNAI2/STK11/SRC/ITGB1/CAV1/MTOR/TSC2/PTRH2/MYBBP1A/SIK1/IKBKG/ITGA5/MAP3K7/PIK3CA/TFDP1/CHEK2/BMF/DAPK2/CEACAM5/BRMS1/PDK4/ANKRD13C	29
GO:0035794	positive regulation of mitochondrial membrane permeability	biological process	50/9065	64/17381	1.57278e-05	0.000253269	0.000182302	1.49795	E2F1/BCL2/HSPA1A/RHOT1/YWHAQ/TP53/BCL2L11/TP73/YWHAZ/PMAIP1/MAPK8/BAX/DYNLL2/YWHAH/SFN/TMEM14A/RHOT2/NMT1/GSK3A/PPP3R1/PPP1R13B/YWHAE/SLC25A5/RTL10/ATPIF1/SLC9A1/BOK/YWHAB/ACAA2/ATF2/GSK3B/PPIF/TFDP1/YWHAG/TFDP2/SLC35F6/BMF/HIP1R/MUL1/BLOC1S2/DYNLL1/BAK1/FZD9/MOAP1/HEBP2/STPG1/BID/TP63/MPV17L/CASP8	50
GO:1901983	regulation of protein acetylation	biological process	50/9065	64/17381	1.57278e-05	0.000253269	0.000182302	1.49795	CHEK1/SET/BRCA1/MECP2/LIF/RPS6KA5/SPI1/SMAD4/MAPK3/BRD7/SIRT1/SNAI2/SOX4/SIN3A/KAT2A/HDAC2/HINT2/SMARCB1/MYOCD/NOC2L/GATA3/CTBP1/KMT2A/WBP2/TGFB1/PPARGC1A/PARK7/IWS1/RUVBL2/ARRB1/SETD5/TADA2B/KAT7/MUC1/TERF2IP/ZNF451/TWIST1/RPS6KA4/FLCN/TADA2A/SDR16C5/EID1/TAF7/CTCF/PIWIL2/PYGO2/IL1B/HDAC8/NOS1/GATA2	50
GO:2000573	positive regulation of DNA biosynthetic process	biological process	50/9065	64/17381	1.57278e-05	0.000253269	0.000182302	1.49795	ATM/KLF4/HNRNPD/PRKD2/MAPK3/MAPK1/RFC5/RFC4/HSP90AB1/CHTF18/DSCC1/CCT3/RFC2/HNRNPA1/SRC/MYC/HSP90AA1/TNKS/PTGES3/CTNNB1/WRAP53/CCT5/CCT7/CCT4/CCT2/CCT6A/TCP1/XRCC5/NVL/NEK7/MAP3K4/AURKB/HNRNPA2B1/MAP2K7/DDX39B/HMBOX1/PARM1/GREM1/MAPKAPK5/FGFR4/ARRB2/PDGFB/POT1/PARN/PAK3/PTK2B/NOX4/TNKS2/NEK2/GRHL2	50
GO:0051972	regulation of telomerase activity	biological process	38/9065	46/17381	1.61389e-05	0.000259393	0.00018671	1.58392	KLF4/HNRNPD/TP53/PPARG/MAPK3/MAPK1/HSP90AB1/SRC/MYC/HSP90AA1/TNKS/PTGES3/CTNNB1/WRAP53/CCT4/CCT2/TCP1/XRCC5/SMG6/PINX1/NVL/NEK7/MAP3K4/AURKB/HNRNPA2B1/PARP4/MAP2K7/HMBOX1/PARM1/GREM1/MAPKAPK5/MEN1/POT1/CERS1/PARN/TERF1/NEK2/GRHL2	38
GO:0071214	cellular response to abiotic stimulus	biological process	190/9065	296/17381	1.63515e-05	0.000261805	0.000188446	1.23075	CDC25A/CCND2/TP53INP1/AKT2/CDKN1A/FADD/CHEK1/HDAC4/RHOB/GRB2/EGFR/KCNJ2/GJA1/CASP9/ATM/EP300/HMGA2/RAD51/COL1A1/NFKB1/CREBBP/CLOCK/FAS/HRAS/TP53/SOX9/MAPK3/PIEZO1/SIRT1/N4BP1/ERRFI1/TLR4/SLC2A4/PTGS2/TP73/MGMT/PTPRK/DNM2/AKT1/SNAI2/MDM2/MMP7/MAPK8/DDX3X/NIPBL/BAX/GADD45A/ATP1A1/MYLK/ECT2/DDB1/POLD1/PCNA/BLM/CRY2/TNKS1BP1/PAPD4/STK11/TMEM109/HABP4/ELK1/CNN2/CUL4B/MME/GNB1/NOC2L/GATA3/CALM1/RAD9A/M…	190
GO:0104004	cellular response to environmental stimulus	biological process	190/9065	296/17381	1.63515e-05	0.000261805	0.000188446	1.23075	CDC25A/CCND2/TP53INP1/AKT2/CDKN1A/FADD/CHEK1/HDAC4/RHOB/GRB2/EGFR/KCNJ2/GJA1/CASP9/ATM/EP300/HMGA2/RAD51/COL1A1/NFKB1/CREBBP/CLOCK/FAS/HRAS/TP53/SOX9/MAPK3/PIEZO1/SIRT1/N4BP1/ERRFI1/TLR4/SLC2A4/PTGS2/TP73/MGMT/PTPRK/DNM2/AKT1/SNAI2/MDM2/MMP7/MAPK8/DDX3X/NIPBL/BAX/GADD45A/ATP1A1/MYLK/ECT2/DDB1/POLD1/PCNA/BLM/CRY2/TNKS1BP1/PAPD4/STK11/TMEM109/HABP4/ELK1/CNN2/CUL4B/MME/GNB1/NOC2L/GATA3/CALM1/RAD9A/M…	190
GO:0014032	neural crest cell development	biological process	48/9065	61/17381	1.63822e-05	0.000261805	0.000188446	1.50875	HES1/ACVR1/ZEB2/NRP1/CORO1C/HAND2/EDN1/JAG1/ERBB4/BMP7/HIF1A/SOX9/MAPK3/MAPK1/SNAI2/EDNRA/LEF1/FOLR1/RDH10/PEF1/TCOF1/TBX1/BMPR1A/EFNB1/FOXC1/ALDH1A2/CFL1/NOLC1/SMO/KLHL12/TAPT1/SOX11/RET/TWIST1/LAMA5/SEMA3F/EDN3/KBTBD8/ALX1/PHOX2B/GDNF/PITX2/SHH/FGF19/PHACTR4/KITLG/SEMA3A/NRG1	48
GO:0010833	telomere maintenance via telomere lengthening	biological process	59/9065	78/17381	1.67432e-05	0.000266562	0.00019187	1.45032	ATM/RAD51/HNRNPU/MAPK3/MAPK1/HSP90AB1/TERT/DCLRE1B/CCT3/TNKS1BP1/MRE11/HNRNPA1/SRC/HSP90AA1/TNKS/SLX4/HNRNPC/PTGES3/CTNNB1/WRAP53/CCT5/NOP10/SMG5/CTC1/CCT7/ZBTB48/PARP1/EXOSC10/CCT4/CCT2/RFC1/CCT6A/NHP2/TCP1/XRCC5/SMG6/PINX1/PAPD5/NEK7/MAP3K4/AURKB/HNRNPA2B1/MAP2K7/HMBOX1/GNL3L/TERF2IP/SMG7/MAPKAPK5/RAD50/POT1/STN1/XRN1/NAT10/PARN/TERF1/DCP2/TERF2/TNKS2/NEK2	59
GO:0046902	regulation of mitochondrial membrane permeability	biological process	59/9065	78/17381	1.67432e-05	0.000266562	0.00019187	1.45032	E2F1/BCL2/HSPA1A/RHOT1/YWHAQ/TP53/HK2/BCL2L11/TP73/STAT3/YWHAZ/PMAIP1/MAPK8/BAX/DYNLL2/YWHAH/SFN/TMEM14A/RHOT2/NMT1/GSK3A/PPP3R1/PPP1R13B/SLC25A6/YWHAE/SLC25A5/SLC25A4/RTL10/CNP/ATPIF1/SLC9A1/BOK/YWHAB/ACAA2/ATF2/BCL2L1/GSK3B/PPIF/TFDP1/YWHAG/TFDP2/SLC35F6/BMF/HIP1R/CAMK2A/MUL1/BLOC1S2/DYNLL1/BAK1/FZD9/MOAP1/MTRNR2L5/HEBP2/STPG1/BID/TP63/MPV17L/CASP8/NAIF1	59
GO:0075733	intracellular transport of virus	biological process	46/9065	58/17381	1.68742e-05	0.000267866	0.000192808	1.52068	POM121/NDC1/XPO1/NUP58/KPNA2/TSG101/RAN/NUP62/NUP50/POM121C/NUP160/NUP210/KPNA5/UBA52/UBB/VPS37C/NUP153/KPNB1/RANBP2/NUP214/AAAS/NUP37/UBC/VPS37B/TPR/NUPL2/KPNA1/NUP98/NUP43/VPS37A/FMR1/NUP205/NUP155/RPS27A/SEH1L/NUP54/NUP93/KPNA4/KPNA3/VPS37D/NUP188/MVB12B/NUP85/CD209/NUP35/NMT2	46
GO:0045667	regulation of osteoblast differentiation	biological process	81/9065	113/17381	1.68887e-05	0.000267866	0.000192808	1.3744	MEF2C/ACVR1/CEBPA/HDAC4/CDK6/PDLIM7/CYR61/HAND2/IGF1/SUFU/DDX5/PTK2/CLIC1/JAG1/BMP7/PTCH1/ACVR2B/IGFBP5/ILK/NOTCH1/IFITM1/BMPR2/SMAD5/SNAI2/RUNX2/CEBPB/NPPC/IL6/RASSF2/ACVR2A/TMEM64/FGFR2/TRPM4/SEMA4D/GNAS/SKI/PRKACA/CTNNBIP1/CTNNB1/FBN2/BMPR1A/ATP6AP1/LIMD1/SMAD3/ID4/JUND/SMOC1/SFRP1/WNT10B/SMAD1/GLI1/AXIN2/TNF/TOB1/IL6ST/SOX11/NOG/HDAC7/GLI3/GREM1/ZHX3/CEBPD/MEN1/ID3/WNT7B/TWIST1/BMP2/SUCO/TMEM…	81
GO:1901861	regulation of muscle tissue development	biological process	100/9065	144/17381	1.69765e-05	0.000268751	0.000193446	1.33151	MEF2C/GATA6/WNT3A/HDAC4/BCL2/PAK1/FGF20/IGF1/GJA1/DDX5/G6PD/SOX6/FGFR1/ERBB3/FGF2/PIM1/ZFPM2/TSC22D3/EDN1/ERBB4/SMAD4/CREB1/IGFBP5/FGF9/TGFBR2/TP73/NOTCH1/TGFBR1/LEF1/TGFBR3/CDK1/SIX1/HMGCR/SIX4/PRKAA1/JARID2/FRS2/FGFR2/DKK1/CENPF/GPC1/MYOCD/CCNB1/MTOR/TBX1/NR1D2/DDX17/GSK3A/CTNNB1/TGFB1/TBX2/BMPR1A/MTPN/PPARGC1A/CTDP1/YBX3/SMAD3/PTEN/EFNB2/USP19/FBXO22/FLOT1/WNT10B/GLI1/RPS6KB1/DDX39B/RBPJ/NOG/P…	100
GO:0090263	positive regulation of canonical Wnt signaling pathway	biological process	89/9065	126/17381	1.70938e-05	0.000270102	0.000194417	1.35434	WNT3A/COL1A1/NFKB1/DVL2/XIAP/ILK/FGF9/LRRK2/DDX3X/ASPM/SULF2/SOX4/PSMD9/WNT5A/FGFR2/WLS/JUP/TRPM4/CTDNEP1/PSME1/UBR5/SRC/LGR4/CAV1/AXIN1/UBA52/PSMD3/UBB/CCAR2/BAMBI/PSMB2/TNKS/DVL1/PSMD4/PSMD11/PSMC1/PSMB3/PSMA7/PSMC5/NRARP/PSMD2/UBC/PSMD6/PSMC4/PSMD1/PSME3/PSMD7/VPS35/PSMA2/PSMD8/PSMD13/PSMC3/SFRP1/WNT10B/DKK2/WNT1/AXIN2/RNF146/RBPJ/WNT2B/PIN1/LRP6/WNT2/PSMA5/ZBED3/SMURF2/PSMA1/RPS27A/PSMF1/CAPR…	89
GO:0071166	ribonucleoprotein complex localization	biological process	92/9065	131/17381	1.79973e-05	0.000283845	0.00020431	1.34655	POM121/SRSF11/CPSF1/SRSF9/SRSF1/SRSF7/DDX39A/NDC1/POLR2D/XPO1/NUP58/NMD3/RBM8A/HHEX/WDR33/GLE1/SRSF2/RAN/SRSF3/NUP62/SRSF6/SRRM1/SYMPK/CPSF3/SLBP/SRSF4/ZC3H11A/NUP50/NOP53/POM121C/EIF4E/NUP160/NUP210/XPOT/SRSF5/NUP153/U2AF2/RNPS1/SMG5/NCBP2/RANBP2/NPM1/SMG1/PABPN1/NUP214/PRPF31/CASC3/AAAS/TSC1/NUP37/IWS1/NOL6/CHTOP/EIF4A3/NXT1/POLDIP3/SMG6/AKAP8L/TPR/CPSF2/NUPL2/THOC5/THOC1/TGS1/HNRNPA2B1/NUP98/R…	92
GO:0048639	positive regulation of developmental growth	biological process	118/9065	174/17381	1.82031e-05	0.000286555	0.000206261	1.30029	NTRK3/MEF2C/GATA6/WNT3A/BCL2/WT1/PAK1/PPIB/NRP1/AGRN/IGF1/SH3PXD2B/SHTN1/SERP1/BDNF/FGFR1/VEGFA/CPNE6/FN1/FGF2/AGR2/PIM1/CSF1/ZFPM2/EDN1/TWF2/ERBB4/SRF/CREB1/ILK/FGF9/TGFBR2/NOTCH1/BMPR2/AKT1/CXCL12/NIPBL/BASP1/TGFBR3/CDK1/NDEL1/RAB11A/FGFR2/RIMS2/CDH4/PLS1/IST1/SEMA4D/L1CAM/CCNB1/ITSN2/MTOR/TBX2/MAP1B/BMPR1A/TRPC5/SYT4/RASAL1/CYFIP1/ZFYVE27/YBX3/MEGF8/SMURF1/STAT5B/PPARD/SMO/EZR/GOLGA4/HLX/GLI1/…	118
GO:0006275	regulation of DNA replication	biological process	84/9065	118/17381	1.82394e-05	0.00028659	0.000206286	1.36491	CDC42/JUN/EHMT2/EGFR/IGF1/BRCA2/FGFR1/FBXW7/IGF1R/TSPYL2/HRAS/PDGFRA/GMNN/RFC5/DONSON/RFC4/ZNF365/CDK1/CHTF18/DSCC1/TICRR/CDC6/PCNA/CDT1/NF2/BLM/IL6/SHC1/CALR/MRE11/RFC2/S100A11/GLI2/ANKRD17/WAPL/SMC3/ATG7/CDAN1/SMC1A/TGFB1/ATRX/PDS5A/E2F8/CTC1/GTPBP4/NUCKS1/STAG2/PPP2CA/CDK2/GLI1/RAC1/BCL6/RBBP6/TNFAIP1/WRNIP1/ZBTB38/ATF1/RAD17/CHEK2/EREG/INS/ID3/TIPIN/WIZ/PDGFB/INSR/CCDC88A/E2F7/STN1/ESCO2/DNA2…	84
GO:0090559	regulation of membrane permeability	biological process	64/9065	86/17381	1.84885e-05	0.000289963	0.000208714	1.42688	E2F1/BCL2/HSPA1A/PDCD6IP/RHOT1/YWHAQ/TP53/HK2/BCL2L11/TP73/STAT3/YWHAZ/PMAIP1/MAPK8/BAX/TJP2/DYNLL2/YWHAH/F11R/SFN/TMEM14A/RHOT2/MTOR/NMT1/GSK3A/PPP3R1/PPP1R13B/SLC25A6/YWHAE/SLC25A5/SLC25A4/RTL10/CNP/ATPIF1/SLC9A1/BOK/YWHAB/ACAA2/ATF2/BCL2L1/GSK3B/PPIF/TFDP1/YWHAG/LAPTM4B/TFDP2/SLC35F6/BMF/HIP1R/CAMK2A/MUL1/BLOC1S2/DYNLL1/BAK1/FZD9/MOAP1/MTRNR2L5/HEBP2/STPG1/BID/TP63/MPV17L/CASP8/NAIF1	64
GO:0043900	regulation of multi-organism process	biological process	241/9065	385/17381	1.88148e-05	0.000294531	0.000212002	1.20023	CDK9/TRAF6/BCL2/CARD8/JUN/RNASEL/FOXP1/HACD3/PPIB/ANXA2/IGF1/POLR2K/DDX5/NELFCD/ADAR/EP300/HMGA2/HPN/P2RX7/CXCL8/ACVR1C/MAPK3/HDAC1/BCL2L11/IFNG/NOTCH1/TBK1/IFITM1/PFN1/POLR2D/VAPA/DDX3X/FAM111A/LEF1/NPPC/DDB1/TOP2A/RSF1/ADARB1/TSG101/TRIM59/TARDBP/RSAD2/STAT1/IFIT1/ISG15/IFITM3/OASL/IFIT5/SLPI/SIN3A/LGALS1/CALR/F2RL1/TRIM26/EXOC2/NOP53/SPINK1/OXTR/NR5A2/PDE12/AIM2/B4GALT1/YTHDF2/SMARCB1/POLR2I/D…	241
GO:0045017	glycerolipid biosynthetic process	biological process	174/9065	269/17381	1.90963e-05	0.000297841	0.000214384	1.24023	GRB2/FGF20/ARF3/INPP5F/ATM/FGFR1/INPPL1/MTMR12/SLC44A1/CPNE6/FBXW7/PIK3R2/FGF2/IRS1/PTPN13/FGF7/FGF9/PIK3CG/CPNE3/RAB5A/LDLR/CSNK2A1/FABP3/AGPAT3/STARD7/PIP4K2C/AGPAT1/LPCAT1/RAB14/MTMR4/MTMR9/VAC14/PIP4K2B/PIGG/FRS2/PLEKHA3/FGFR2/PTPMT1/PIGT/GPAT4/RGN/PIGS/ETNK1/CTDNEP1/GPAA1/FIG4/CSNK2A2/SCARB1/ARF1/PIKFYVE/PIGC/SREBF1/AGPAT2/SBF1/PIP5K1A/PTPN11/INPP4A/PIGO/PLA2G12A/GAB1/PTDSS2/PIP5K1C/HDHD5/PT…	174
GO:0098732	macromolecule deacylation	biological process	79/9065	110/17381	1.90969e-05	0.000297841	0.000214384	1.37702	SPRED1/HDAC4/VEGFA/EP300/RCOR1/PRKD2/MTA2/TP53/SIRT1/HDAC1/IFNG/LRRK2/MAPK8/RBBP7/NIPBL/CHD4/NACC2/ARID4B/SPRED2/SIN3A/ABHD12/HDAC2/CTBP1/MIER1/DYRK1A/SMARCAD1/CCAR2/SKI/SREBF1/SALL1/TGFB1/MSL3/SFPQ/AKAP8/RBM14/SAP18/AKAP8L/TADA3/SIN3B/SUDS3/BRMS1L/BCL6/MTA1/KDM5A/ABHD17C/ELK4/LYPLAL1/REST/SIRT4/HDAC7/LYPLA2/MORF4L2/TBL1XR1/BAZ2A/HDAC5/PER1/PRDM5/ABHD17B/MORF4L1/FRY/SDR16C5/HDAC9/TBL1X/MTA3/SAP30…	79
GO:0009185	ribonucleoside diphosphate metabolic process	biological process	87/9065	123/17381	1.94547e-05	0.00030286	0.000217997	1.35619	HDAC4/TPI1/ADPGK/PKM/IGF1/POM121/P2RX7/PPARA/HIF1A/HK2/SCRIB/STAT3/NDC1/NUP58/TJP2/PRKAA1/NUP62/NUP50/POM121C/PRKAG1/NUP160/NUP210/LDHA/GPI/NUP153/ENO1/PFKP/GAPDH/OGDHL/RANBP2/PPARGC1A/PGAM1/ALDOA/PFKFB4/TIGAR/NUP214/AAAS/NUP37/BPGM/TPR/AK2/NUPL2/DLG3/PRKAA2/HK1/MPP2/NUP98/NUP43/DDIT4/OGT/PGK1/ENTPD4/PFKFB2/INS/ENO2/NUP205/NUP155/SEH1L/PGM2L1/PGAM4/NUP54/INSR/EIF6/CASK/ENO4/NUP93/MAGI3/ESRRB/ENTP…	87
GO:0048675	axon extension	biological process	74/9065	102/17381	1.95276e-05	0.000302876	0.000218008	1.39104	NTRK3/WNT3A/RAB21/PAK1/NRP1/SHTN1/VEGFA/FN1/TWF2/SRF/ILK/DNM2/BMPR2/CXCL12/NRP2/NDEL1/RNF6/RAB11A/WNT5A/PLXNA4/CDH4/CTTN/L1CAM/ITGB1/TTL/VCL/DVL1/MAP1B/TRPC5/SLIT1/SLC9A6/CYFIP1/ZFYVE27/WDR36/MEGF8/ABL1/GOLGA4/RAPH1/USP9X/ULK1/PLXNA1/PPP3CB/NKX6-1/DPYSL2/APOE/PAFAH1B1/CDK5R1/GDI1/SEMA7A/ALCAM/LIMK1/PTPRS/PLXNA2/MAPT/SEMA5A/SEMA4F/DRAXIN/DISC1/NTN1/WNT3/RTN4R/SEMA3F/MAG/TRPV2/BARHL2/RTN4/ISLR2/ULK…	74
GO:1901800	positive regulation of proteasomal protein catabolic process	biological process	74/9065	102/17381	1.95276e-05	0.000302876	0.000218008	1.39104	PLK2/CEBPA/HSPA1A/OSBPL7/RNF138/ANKIB1/PIAS1/FBXW7/TRIB2/AKT1/LRRK2/MDM2/SOCS4/CSNK1A1/NOP53/CAV1/BAG6/RACK1/DVL1/XBP1/RAD23A/USP5/PSMC1/PLK1/KEAP1/UBQLN2/PSMC5/UBQLN1/PSMC4/RNF40/ARIH2/AURKA/SUMO2/FBXO22/PSMC3/VCP/GSK3B/TMTC3/ARIH1/USP13/EDEM1/FMR1/LONRF2/CSNK1E/LONRF1/DAB2IP/PRICKLE1/SOCS5/TRIB3/SMAD7/GBA/SUMO1/RNF217/RNF144B/HERPUD1/NKD2/LONRF3/ATXN3/PRKN/RNF19B/RNF125/TRIB1/DAB2/RNF14/KLHL40/…	74
GO:1902893	regulation of pri-miRNA transcription from RNA polymerase II promoter	biological process	26/9065	29/17381	1.99342e-05	0.000308317	0.000221925	1.71903	HDAC4/JUN/PPARA/TP53/HIF1A/SPI1/SRF/SOX9/STAT3/FOS/TERT/NFIB/TGFB1/BMPR1A/SMARCA4/SMAD3/NFATC3/PPARD/YY1/SMAD1/SMAD6/TEAD1/NGFR/BMP2/PDGFB/RELA	26
GO:0035264	multicellular organism growth	biological process	101/9065	146/17381	1.99516e-05	0.000308317	0.000221925	1.3264	CDC42/PLAG1/BCL2/H3F3B/HOXA5/SOD1/RARG/PPIB/GPD2/IGF1/SH3PXD2B/ATM/APP/CDKN1C/CSF1/CREB1/PTCH1/STAT3/NIPBL/CDK4/NPPC/WWTR1/TMED2/CLIC4/HHEX/ADARB1/HEG1/FGFR2/KAT2A/GPAT4/PLS1/STK40/GNAS/MTOR/HTRA2/RAI1/GIGYF2/ATRX/PTPN11/CTC1/FKBP8/ANKRD11/NDUFS6/SPTBN2/STAT5B/SMO/EZR/WDTC1/DHCR7/AR/PIK3CA/PLEKHA1/ARID5B/SGPL1/TARBP2/ZFP36L1/RARB/RBBP6/ADRB1/CHD7/SLC12A5/STAT5A/STC2/BBS4/KDM6A/IHH/ZNF84/CACNA2D2/…	101
GO:0034333	adherens junction assembly	biological process	62/9065	83/17381	2.03841e-05	0.000314423	0.00022632	1.43226	BCL2/ROCK1/THBS1/NRP1/CORO1C/SDC4/VEGFA/PTK2/FERMT2/KDR/TEK/PTPRK/RHOA/LIMS1/ACTN1/DLC1/RCC2/DMTN/JUP/PHLDB2/CTTN/TBCD/THY1/SRC/VCL/ZNF703/PDPK1/CTNNB1/PIP5K1A/TSC1/SMAD3/PIP5K1C/PTEN/IQGAP1/TAOK2/SLC9A1/ABL1/CAMSAP3/PPM1F/HIPK1/SFRP1/RAC1/ROCK2/PTPRJ/ITGA2/MMP14/SMAD7/FMN1/GREM1/LDB1/DLG5/CLASP1/TESK2/LAMA5/EFNA5/GPM6B/WNT4/WHAMM/WDPCP/ACVRL1/PTK2B/BCAS3	62
GO:1901654	response to ketone	biological process	125/9065	186/17381	2.04235e-05	0.000314455	0.000226343	1.28856	NTRK3/TLR2/CCND1/CDKN1A/FOXO3/DNMT3B/FOXO1/THBS1/EGFR/CASP9/ADCY6/KLF4/PRKCE/HNRNPD/HNRNPU/EDN1/PPARG/SIRT1/MSN/ERRFI1/KLF9/FOS/AKT1/CSNK2A1/CFTR/CDK4/GJB2/TGFBR3/TYMS/PCNA/KIF1B/IL6/NR3C1/PRKAA1/ELK1/GNAI1/BGLAP/SPP1/SIN3A/CALR/DSG2/OXTR/IGFBP7/EIF4E/GNB1/CCL2/ARG1/SRC/CAV1/GPI/LARP1/SREBF1/WBP2/TGFB1/FDX1/AKR1B1/CDC5L/AKAP8/PARP1/ACACA/DCPS/ADCY1/RPL32/NASP/PRKAA2/BCL2L1/HOXD13/SFRP1/CD38/DUSP1…	125
GO:1903749	positive regulation of establishment of protein localization to mitochondrion	biological process	82/9065	115/17381	2.0693e-05	0.000317583	0.000228594	1.36717	HES1/E2F1/BAP1/BCL2/YWHAQ/HPS4/FBXW7/TP53/BCL2L11/TP73/YWHAZ/PMAIP1/MAPK8/STARD7/HHAT/FAM20B/RAC2/DYNLL2/YWHAH/NKAP/KAT2A/SFN/CSNK2A2/WDR46/NMT1/HTRA2/GSK3A/U2AF2/PPP3R1/USP36/MYBPC1/HUWE1/PPP1R13B/YWHAE/HSPA1L/RUVBL1/SAE1/VPS11/SREBF2/ARIH2/YWHAB/PDCD5/PSMD8/ATG13/ACTL6A/TFDP1/LEPROT/PLAGL2/SELENOI/YWHAG/SH3GLB1/TFDP2/BMF/RHOU/UBE2D3/KCNN3/CDKL2/NBPF3/FZD5/DPCR1/ZBED3/GPHA2/NPEPPS/DYNLL1/UGCG/GP…	82
GO:0070302	regulation of stress-activated protein kinase signaling cascade	biological process	141/9065	213/17381	2.07021e-05	0.000317583	0.000228594	1.26925	CDC42/TRAF6/ZEB2/PDCD4/PAK1/FOXO1/HACD3/EGFR/HAND2/MAP2K1/VEGFA/APP/IGF1R/DVL2/EDN1/CD40LG/FAS/HRAS/MAP3K11/MAPK3/MAPK1/TLR4/TP73/CTGF/RB1CC1/AKT1/GADD45A/HMGB1/HMGCR/PHLPP1/EPHA4/RASSF2/WNT5A/MAP3K21/GSTP1/F2RL1/DKK1/PDCD10/PTPN22/ZNF622/HIPK3/PTPN1/RIPK2/MAP4K2/AXIN1/MYC/HIPK2/MINK1/TIAM1/QARS/MID1/DUSP3/MAP3K2/TAOK3/RPS3/DNAJA1/DBNL/HSPH1/SPAG9/RAPGEF1/SEMA4C/MAP3K3/ITCH/TAOK2/SYK/FLT4/PRMT1/S…	141
GO:1903900	regulation of viral life cycle	biological process	93/9065	133/17381	2.14491e-05	0.000328444	0.000236412	1.34072	BCL2/RNASEL/HACD3/PPIB/DDX5/ADAR/HMGA2/CXCL8/NOTCH1/IFITM1/VAPA/DDX3X/FAM111A/DDB1/TOP2A/ADARB1/TSG101/TRIM59/RSAD2/IFIT1/ISG15/IFITM3/OASL/IFIT5/SLPI/LGALS1/TRIM26/NR5A2/PDE12/PPIA/CHMP2A/ISG20/SMC3/LARP1/TRIM28/PABPC1/VPS4A/RAD23A/ILF3/HSPA8/PARP10/NUCKS1/TNIP1/PPIE/VAPB/VPS37B/SRPK1/MAVS/SNF8/TNF/TARBP2/CCNK/FMR1/CHMP2B/TRIM8/CHMP4B/CCL5/PLSCR1/TRIM13/STOM/APOBEC3F/STAU1/CD4/TRIM25/TRIM31/PRKN…	93
GO:0006096	glycolytic process	biological process	72/9065	99/17381	2.19363e-05	0.000334688	0.000240906	1.39445	HDAC4/TPI1/ADPGK/PKM/IGF1/POM121/P2RX7/PPARA/HIF1A/HK2/STAT3/NDC1/NUP58/PRKAA1/NUP62/NUP50/POM121C/PRKAG1/NUP160/NUP210/LDHA/GPI/NUP153/ENO1/PFKP/GAPDH/OGDHL/RANBP2/PPARGC1A/PGAM1/ALDOA/PFKFB4/TIGAR/NUP214/AAAS/NUP37/BPGM/TPR/NUPL2/PRKAA2/HK1/NUP98/NUP43/DDIT4/OGT/PGK1/PFKFB2/INS/ENO2/NUP205/NUP155/SEH1L/PGM2L1/PGAM4/NUP54/INSR/EIF6/ENO4/NUP93/ESRRB/ENTPD5/NUP188/MLXIPL/DHTKD1/ALDOC/NUP85/CBFA2T3…	72
GO:1901184	regulation of ERBB signaling pathway	biological process	72/9065	99/17381	2.19363e-05	0.000334688	0.000240906	1.39445	PTPN12/CDC42/GRB2/SNX6/EGFR/ERBB3/FBXW7/APP/AGR2/HGS/ERBB2/ERBB4/ERRFI1/AKT1/SOCS4/TSG101/SHC1/NUP62/SPRY2/SH3TC2/BTC/ITGA1/CDH13/UBA52/UBB/STAM2/EPN1/FER/CNOT9/RNF115/UBC/SPRY1/RAB7A/NEURL1/CBL/PTPRJ/DAB2IP/RBPJ/GPRC5A/SOCS5/STAM/EREG/MMP9/HIP1R/TGFA/HIP1/EPS15L1/NRG4/EGF/RPS27A/RNF126/EPGN/ADAM17/ADRA2B/PTK6/RTN4/PTPN3/NRG2/SH3KBP1/FASLG/MVB12B/ARAP1/HBEGF/SOS1/CBLB/EPS15/NRG1/PLAUR/PTPN18/RHBD…	72
GO:0038111	interleukin-7-mediated signaling pathway	biological process	33/9065	39/17381	2.208e-05	0.000335664	0.000241609	1.62239	HIST1H3B/PIK3R2/IRS1/STAT3/BRWD1/HIST2H3A/HIST2H3D/HIST2H3C/HIST1H3D/SMARCA4/HIST1H3H/STAT5B/CISH/PIK3CA/PIK3R1/HIST1H3C/HIST1H3J/HIST1H3F/FYN/STAT5A/IL7/HIST1H3G/SOCS1/PIK3C3/ELOC/HIST1H3E/HIST1H3A/JAK3/IRS2/PTK2B/IL7R/SOCS2/PIK3CB	33
GO:0061028	establishment of endothelial barrier	biological process	33/9065	39/17381	2.208e-05	0.000335664	0.000241609	1.62239	ROCK1/IKBKB/TJP1/MSN/RAP1A/TJP2/RAP2C/RAP1B/F2RL1/RAPGEF2/F11R/CTNNB1/RAPGEF1/RDX/EZR/ICAM1/TNF/ROCK2/MARVELD2/PTPRS/S1PR2/MYADM/S1PR3/WNT7B/PPP1R16B/PDE4D/ENG/CLDN1/ADD1/WNT7A/CDH5/IL1B/PDE2A	33
GO:0061180	mammary gland epithelium development	biological process	51/9065	66/17381	2.2472e-05	0.000340394	0.000245014	1.48161	AKT2/CCND1/ESR1/HOXA5/IQGAP3/BRCA2/MED1/CSF1/DDR1/ERBB4/HIF1A/PTCH1/MAPK1/SCRIB/MGMT/AKT1/CEBPB/BAX/EPHA2/BTRC/WNT5A/PGR/FGFR2/GLI2/GATA3/SRC/ZNF703/TGFB1/GPX1/PHB2/SMO/RREB1/AR/ID2/ROBO1/WNT2/STAT6/CCL11/NTN1/WNT7B/WNT3/KDM5B/RTN4/WNT4/LATS1/MSX2/PYGO2/VDR/TBX3/ETV5/MSX1	51
GO:0071479	cellular response to ionizing radiation	biological process	51/9065	66/17381	2.2472e-05	0.000340394	0.000245014	1.48161	CCND2/CDKN1A/RHOB/GRB2/ATM/HMGA2/RAD51/CLOCK/HRAS/TP53/SIRT1/MGMT/DNM2/SNAI2/MDM2/NIPBL/GADD45A/ECT2/BLM/TNKS1BP1/TMEM109/ELK1/GATA3/RAD9A/TGFB1/NUCKS1/XRCC6/RPL26/XRCC5/EEF1D/BCL2L1/SFRP1/HSPA5/YAP1/TP53BP1/CHEK2/EGR1/GTF2H5/WRN/H2AFX/TLK2/MAPK14/FIGNL1/INO80/SPIDR/HUS1/INTS7/NOX4/IFI16/RHNO1/TANK	51
GO:0045665	negative regulation of neuron differentiation	biological process	129/9065	193/17381	2.27469e-05	0.00034394	0.000247566	1.28156	HES1/WNT3A/PLK2/NOTCH3/FOXO3/LRP1/NRP1/GAK/ADCY6/CERS2/INPP5F/MED1/APP/PTK2/LRP4/DPYSL3/ARHGDIA/SNAPIN/SOX2/JAG1/BMP7/SOX9/TP73/NOTCH1/PAX6/MDM2/LPAR1/RHOA/DLX1/ZNF365/ASPM/EPHA4/PTPRG/SPART/DDX6/RNF6/YWHAH/WNT5A/SPP1/BAG5/DTX1/LGALS1/CALR/HDAC2/RAPGEF2/EIF4E/THY1/BCL11A/RAB29/EPHA7/FKBP4/GSK3A/TRPC5/SYNGAP1/TRAK2/PRPF19/TSC1/MIB1/PTEN/DLX2/ID4/CDK5RAP2/EFNB2/EFNA1/APOE/GSK3B/CARM1/B2M/PAFAH1B1/A…	129
GO:0071824	protein-DNA complex subunit organization	biological process	176/9065	273/17381	2.28348e-05	0.00034465	0.000248077	1.23611	ESR1/GTF2H1/H3F3B/RAD51C/SET/PTMA/CAND1/ARID2/ARID1A/ANP32B/HIST1H3B/PIAS1/RAD51/TAF4B/TSPYL1/MED6/TSPYL2/SOX9/CREB1/GMNN/RB1/HMGA1/MIS18BP1/TAF9/RBBP7/OIP5/CENPU/HMGB1/HELLS/CHAF1B/DDB1/CENPQ/ASF1B/CDT1/HIST1H1D/RSF1/RPA2/POGZ/ASF1A/TCF4/TSPYL4/CUL4B/HIST2H3A/H1FX/HIST1H1B/ORC3/H3F3C/SMARCC1/CENPF/BRDT/MCM2/SMARCB1/HIST2H3D/HIST2H3C/HIST3H3/HP1BP3/ANP32E/HIST1H2BK/ATF7IP/MYC/HIST1H2BJ/UBA52/UBB/…	176
GO:0031334	positive regulation of protein complex assembly	biological process	152/9065	232/17381	2.3233e-05	0.000350033	0.000251951	1.25621	MET/ESR1/GTF2H1/HSPA1A/JUN/PAK1/GRB2/CAND1/MITF/FAF1/VEGFA/FSCN1/PRKCE/MECP2/CDKN1B/FAS/TP53/SRF/CREB1/PIEZO1/BCL2L11/MSN/TLR4/IFNG/PMAIP1/PFN1/BAX/PSRC1/VASP/DDB1/CDC42EP4/ABI2/CDT1/SNX9/SPIRE1/RPA2/CLIP1/FNIP1/ARPC5/CUL4B/EIF4G1/AIM2/RHOC/LCP1/CTTN/SRC/ARF1/CORO1B/RACK1/MTOR/HSPA1B/CTNNB1/TGFB1/BAIAP2/BCLAF1/PSMC1/FER/JMY/TRIM27/WASHC2C/WARS/PARP1/RPS3/CYFIP1/PSMC5/CUL4A/GTF2H2/MED25/PSMC4/WASH…	152
GO:0001945	lymph vessel development	biological process	23/9065	25/17381	2.33936e-05	0.000351823	0.00025324	1.76398	VEGFA/ACVR2B/BMPR2/PDPN/TMEM204/EPHA2/HEG1/TBX1/FOXC1/PTPN14/EFNB2/SYK/FLT4/PPP3CB/PKD1/LGALS8/PROX2/VASH1/NR2F2/VEGFC/CCBE1/PROX1/ACVRL1	23
GO:0090175	regulation of establishment of planar polarity	biological process	80/9065	112/17381	2.34611e-05	0.00035221	0.000253519	1.36955	CDC42/WNT9B/DVL2/GPC4/PFN1/RHOA/PSMD9/WNT5A/AP2S1/DKK1/CLTC/PSME1/UBA52/PSMD3/UBB/AP2B1/PSMB2/AP2A2/TIAM1/DVL1/PSMD4/PSMD11/PSMC1/PSMB3/PSMA7/PSMC5/PTK7/SMURF1/AP2A1/PSMD2/UBC/PSMD6/PSMC4/PSMD1/PSME3/PSMD7/ABL1/VANGL1/SEC24B/PSMA2/PSMD8/PSMD13/PSMC3/MED12/SFRP1/WNT1/RAC1/FZD4/VANGL2/ZNRF3/FZD6/PRICKLE1/CELSR3/FZD7/PSMA5/FZD5/NPHP3/SMURF2/PSMA1/RPS27A/PSMF1/ARRB2/AP2M1/PRICKLE2/PSMB9/MLLT3/NKD1/DV…	80
GO:0002181	cytoplasmic translation	biological process	49/9065	63/17381	2.37851e-05	0.000356437	0.000256561	1.49129	DPH1/RBM4/EIF4B/TICRR/ZNF385A/EIF4G1/YTHDF2/FTSJ1/CPEB3/UNK/RPL36A/RPL29/RPL4/RPLP1/EIF3M/RPL8/EIF3D/EEF2/RPL26L1/RPS3A/EIF3A/RPL9/RPL7L1/RPL27A/RPS3/YBX3/RPL26/RPL22/RPL31/RPL35A/RPL15/RPL36/RPS7/EIF5/DENR/EIF4H/RPL13A/FMR1/CPEB2/GSPT1/EIF4EBP1/CPEB4/LIN28A/MCTS1/RPL30/RPL22L1/DPH2/DNAJC24/RWDD1	49
GO:0030168	platelet activation	biological process	108/9065	158/17381	2.39201e-05	0.000357824	0.00025756	1.31061	WNT3A/RHOB/F2/CSRP1/AXL/ITPR1/PRKCE/CLIC1/COL1A1/CD40LG/SRF/MAPK3/PDGFRA/MAPK1/TLR4/MERTK/ILK/PIK3CG/YWHAZ/AKT1/PDPN/RHOA/VAV3/RAC2/IL6/TRPC3/DGKH/DMTN/FLNA/STXBP3/GNB1/GNA13/ACTB/SRC/GNAS/VCL/TLN1/ACTG1/PDPK1/COL3A1/PTPN11/PRKCA/VAV2/MYH9/DGKZ/SYK/FIBP/RAP2B/SERPINE2/RAF1/ARRB1/PIK3CD/APOE/RAC1/PIK3CA/FZD6/BLOC1S3/PRKCD/F2R/PIK3R1/FYN/PRKCH/LYN/PLSCR1/F2RL2/SAA1/F2RL3/MYL12A/ARRB2/MYL9/UBASH3B/P…	108
GO:0050434	positive regulation of viral transcription	biological process	35/9065	42/17381	2.42943e-05	0.000362136	0.000260663	1.59781	CDK9/JUN/POLR2K/NELFCD/EP300/HPN/PFN1/POLR2D/LEF1/RSF1/SMARCB1/POLR2I/SP1/POLR2A/POLR2L/NELFE/RRP1B/POLR2B/SMARCA4/CHD1/SUPT5H/NUCKS1/POLR2C/CTDP1/POLR2F/MDFIC/TAF11/GTF2F1/ZNF639/CCNT1/POLR2E/GTF2B/TFAP4/SUPT4H1/SNW1	35
GO:0070849	response to epidermal growth factor	biological process	35/9065	42/17381	2.42943e-05	0.000362136	0.000260663	1.59781	PTPN12/EGFR/MED1/COL1A1/ERBB2/ERBB4/SOX9/MAPK3/MAPK1/ERRFI1/AKT1/SNAI2/ZFP36L2/MCM7/GSTP1/PDPK1/NCL/BAIAP2/EEF1A1/PTPN11/FOXC1/MARS/STAT5B/IQGAP1/TPR/GAREM1/CBL/ZFP36L1/DAB2IP/BAG4/BECN1/PLCG1/PAX2/ASCL1/ZFP36	35
GO:0016239	positive regulation of macroautophagy	biological process	47/9065	60/17381	2.49507e-05	0.000370608	0.000266761	1.50194	HMOX1/HIF1A/MAPK3/UVRAG/SIRT1/KDR/TBK1/PIP4K2C/SESN2/CDC37/SMCR8/RAB12/FYCO1/PIP4K2B/RALB/MFN2/GNAI3/RIPK2/LARP1/TSC2/HTT/SUPT5H/TSC1/PIP4K2A/SMURF1/SCOC/CLEC16A/VPS13C/SPTLC1/ULK1/PRKAA2/IKBKG/MAP3K7/WAC/PAFAH1B2/SH3GLB1/BECN1/TRIM13/RAB3GAP1/PIM2/PRKN/SPTLC2/CALCOCO2/OPTN/RAB3GAP2/LRSAM1/KIAA1324	47
GO:1902110	positive regulation of mitochondrial membrane permeability involved in apoptotic process	biological process	47/9065	60/17381	2.49507e-05	0.000370608	0.000266761	1.50194	E2F1/BCL2/HSPA1A/RHOT1/YWHAQ/TP53/BCL2L11/TP73/YWHAZ/PMAIP1/MAPK8/BAX/DYNLL2/YWHAH/SFN/TMEM14A/RHOT2/NMT1/GSK3A/PPP3R1/PPP1R13B/YWHAE/SLC25A5/RTL10/ATPIF1/BOK/YWHAB/ACAA2/ATF2/GSK3B/TFDP1/YWHAG/TFDP2/SLC35F6/BMF/HIP1R/MUL1/BLOC1S2/DYNLL1/BAK1/FZD9/MOAP1/STPG1/BID/TP63/MPV17L/CASP8	47
GO:0040017	positive regulation of locomotion	biological process	300/9065	490/17381	2.55172e-05	0.000378355	0.000272338	1.1739	DRD1/NTRK3/MET/ACVR1/AKT2/FADD/HDAC4/BCL2/JUN/PAK1/SOD2/FOXP1/RHOB/THBS1/NRP1/EGFR/CYR61/IGF1/TMSB4X/EPB41L4B/SHTN1/PREX1/LAMC2/CRK/TAC1/FGFR1/VEGFA/PRKCE/ETS1/APP/FN1/FGF2/PTK2/PRKD2/IL1R1/COL1A1/CXCL8/PLAU/IGF1R/CSF1/EDN1/HRAS/BMP7/HIF1A/FGF7/SOX9/MAPK3/PDGFRA/SERPINE1/MAPK1/FLT1/KDR/ARTN/ILK/PTGS2/PODXL/SLC8A1/TGFBR2/TEK/IFNG/NOTCH1/MAPRE1/NTF3/CPNE3/BMPR2/AKT1/PFN1/SNAI2/MDM2/ADAM9/PDPN/LPAR1…	300
GO:0048701	embryonic cranial skeleton morphogenesis	biological process	37/9065	45/17381	2.57774e-05	0.000381542	0.000274631	1.57651	MEF2C/CHST11/WNT9B/PDGFRA/TGFBR2/RUNX2/SMAD2/TGFBR1/NIPBL/SIX1/MTHFD1/SIX4/FGFR2/SLC39A3/RDH10/GNAS/MTHFD1L/TBX1/NDST1/SMAD3/DLX2/EIF4A3/MED12/SETD2/NODAL/MMP14/HOXA1/TWIST1/TFAP2A/PAX5/PRRX1/IFT140/SLC39A1/MMP16/TULP3/IRX5/GRHL2	37
GO:0002218	activation of innate immune response	biological process	192/9065	301/17381	2.59759e-05	0.000383805	0.000276261	1.22304	S100A9/IRAK2/KRAS/TLR2/FADD/ESR1/TRAF6/IRAK1/HSPA1A/PAK1/WDFY1/UNC93B1/EP300/PRKCE/IKBKB/HSP90B1/HSPD1/CYLD/NFKB1/RPS6KA5/CREBBP/MATR3/CHUK/HRAS/MUC4/TLR4/IKBKE/XIAP/NFKBIA/TBK1/HMGB1/S100A14/BTRC/PSMD9/ERBIN/IRF7/ITGB2/RSAD2/SIN3A/F2RL1/NOP53/AIM2/PTPN22/DDX60/PSME1/ANKRD17/PQBP1/RIPK2/SRC/LGR4/CAV1/SEC14L1/LSM14A/UBA52/PSMD3/UBB/PSMB2/PDPK1/PRKACA/NONO/HSPA1B/UBE2N/PSMD4/PSMD11/SKP1/PSMC1/SFPQ/…	192
GO:0006333	chromatin assembly or disassembly	biological process	127/9065	190/17381	2.61559e-05	0.000385788	0.000277688	1.28161	H3F3B/SET/ARID2/ARID1A/ANP32B/HIST1H3B/HMGA2/TSPYL1/TSPYL2/MTA2/TP53/SOX9/CDKN2A/HMGA1/MIS18BP1/RBBP7/OIP5/CENPU/HMGB1/HELLS/CHAF1B/CENPQ/ASF1B/HIST1H1D/RSF1/BAHD1/ASF1A/TSPYL4/HIST2H3A/H1FX/HIST1H1B/H3F3C/SMARCC1/MCM2/SMARCB1/HIST2H3D/NOC2L/HIST2H3C/HIST3H3/HP1BP3/ANP32E/HIST1H2BK/HIST1H2BJ/HIST1H3D/HIST2H2BF/HIST1H2BC/SMARCD1/HIST1H2BD/HIST1H1E/CDAN1/TNRC18/ATRX/SMARCA4/HIST2H4B/NPM1/PARP10/HIS…	127
GO:0001885	endothelial cell development	biological process	43/9065	54/17381	2.65507e-05	0.000385869	0.000277746	1.5268	MET/ROCK1/NOTCH4/IKBKB/TJP1/MSN/RAP1A/TJP2/CLIC4/RAP2C/HEG1/RAP1B/F2RL1/RAPGEF2/F11R/PLOD3/CTNNB1/GSTM3/GPX1/RAPGEF1/RDX/EZR/ICAM1/TNF/ROCK2/ARHGEF26/MARVELD2/PTPRS/S1PR2/MYADM/S1PR3/WNT7B/PPP1R16B/PDE4D/ENG/CLDN1/ADD1/COL18A1/WNT7A/VEZF1/CDH5/IL1B/PDE2A	43
GO:0043388	positive regulation of DNA binding	biological process	43/9065	54/17381	2.65507e-05	0.000385869	0.000277746	1.5268	HES1/WNT3A/TRAF6/HAND2/IGF1/KLF4/HMGA2/CALM3/CALM2/PPARG/RB1/IFNG/HMGB1/CDCA5/KAT2A/EDF1/MYOCD/GATA3/WAPL/HIPK2/SKI/TRIM28/CTNNB1/TGFB1/PARK7/FOXC1/PARP1/PINX1/CEBPG/IRF4/ITGA2/MMP9/EGF/TWIST1/PRKN/GTF2B/PITX2/HMGB2/HDAC8/PLAUR/TRIM6/POU4F1/NEUROD1	43
GO:0032872	regulation of stress-activated MAPK cascade	biological process	140/9065	212/17381	2.65726e-05	0.000385869	0.000277746	1.26619	CDC42/TRAF6/ZEB2/PDCD4/PAK1/FOXO1/HACD3/EGFR/HAND2/MAP2K1/VEGFA/APP/IGF1R/DVL2/EDN1/CD40LG/FAS/HRAS/MAP3K11/MAPK3/MAPK1/TLR4/TP73/CTGF/RB1CC1/AKT1/GADD45A/HMGB1/HMGCR/PHLPP1/EPHA4/RASSF2/WNT5A/MAP3K21/GSTP1/F2RL1/DKK1/PDCD10/PTPN22/ZNF622/HIPK3/PTPN1/RIPK2/MAP4K2/AXIN1/MYC/HIPK2/MINK1/TIAM1/QARS/MID1/DUSP3/MAP3K2/TAOK3/RPS3/DNAJA1/DBNL/HSPH1/SPAG9/RAPGEF1/SEMA4C/MAP3K3/ITCH/TAOK2/SYK/FLT4/PRMT1/S…	140
GO:0060147	regulation of posttranscriptional gene silencing	biological process	78/9065	109/17381	2.65806e-05	0.000385869	0.000277746	1.37207	ESR1/H3F3B/EGFR/POLR2K/HIST1H3B/POM121/DDX5/ADAR/MAP2K1/NCOR2/STAT3/NDC1/POLR2D/NUP58/TERT/MYCN/AGO1/RAN/NUP62/HIST2H3A/IPO8/NUP50/EIF4G1/POM121C/POLR2I/NUP160/NUP210/HIST2H3D/HIST2H3C/TNRC6A/HIST1H3D/NUP153/POLR2A/POLR2L/TGFB1/POLR2B/LIMD1/RANBP2/HIST2H4B/HIST1H4E/XPO5/POLR2C/NUP214/AAAS/NUP37/HIST1H3H/PUM1/TPR/POLR2F/NUPL2/AGO2/NUP98/NUP43/ELAVL1/FXR1/FMR1/TRIM71/HIST1H3C/HIST1H3J/HIST1H3F/LIN2…	78
GO:0060966	regulation of gene silencing by RNA	biological process	78/9065	109/17381	2.65806e-05	0.000385869	0.000277746	1.37207	ESR1/H3F3B/EGFR/POLR2K/HIST1H3B/POM121/DDX5/ADAR/MAP2K1/NCOR2/STAT3/NDC1/POLR2D/NUP58/TERT/MYCN/AGO1/RAN/NUP62/HIST2H3A/IPO8/NUP50/EIF4G1/POM121C/POLR2I/NUP160/NUP210/HIST2H3D/HIST2H3C/TNRC6A/HIST1H3D/NUP153/POLR2A/POLR2L/TGFB1/POLR2B/LIMD1/RANBP2/HIST2H4B/HIST1H4E/XPO5/POLR2C/NUP214/AAAS/NUP37/HIST1H3H/PUM1/TPR/POLR2F/NUPL2/AGO2/NUP98/NUP43/ELAVL1/FXR1/FMR1/TRIM71/HIST1H3C/HIST1H3J/HIST1H3F/LIN2…	78
GO:0030397	membrane disassembly	biological process	39/9065	48/17381	2.65878e-05	0.000385869	0.000277746	1.55787	POM121/NDC1/NUP58/CDK1/NDEL1/NUP62/EMD/NUP50/POM121C/NUP160/CTDNEP1/NUP210/CCNB1/NUP153/PLK1/RANBP2/NUP214/AAAS/PRKCA/NUP37/NEK9/AKAP8L/TPR/NUPL2/NUP98/NUP43/CNEP1R1/PAFAH1B1/NUP205/NUP155/SEH1L/NUP54/NUP93/NUP188/PRKCB/NUP85/NUP35/LMNA/LPIN1	39
GO:0051081	nuclear envelope disassembly	biological process	39/9065	48/17381	2.65878e-05	0.000385869	0.000277746	1.55787	POM121/NDC1/NUP58/CDK1/NDEL1/NUP62/EMD/NUP50/POM121C/NUP160/CTDNEP1/NUP210/CCNB1/NUP153/PLK1/RANBP2/NUP214/AAAS/PRKCA/NUP37/NEK9/AKAP8L/TPR/NUPL2/NUP98/NUP43/CNEP1R1/PAFAH1B1/NUP205/NUP155/SEH1L/NUP54/NUP93/NUP188/PRKCB/NUP85/NUP35/LMNA/LPIN1	39
GO:0045778	positive regulation of ossification	biological process	63/9065	85/17381	2.66552e-05	0.000385869	0.000277746	1.42111	MEF2C/ACVR1/CEBPA/PDLIM7/CYR61/IGF1/TAC1/CLIC1/P2RX7/JAG1/BMP7/ACVR2B/ILK/SLC8A1/IFITM1/BMPR2/SMAD5/RUNX2/CEBPB/NIPBL/NPPC/IL6/ACVR2A/WNT5A/ISG15/GNAS/CTNNBIP1/TOB2/CTNNB1/FBN2/TGFB1/BMPR1A/ATP6AP1/SMAD3/ID4/JUND/ANO6/WNT10B/KL/SMAD1/IL6ST/SOX11/GLI3/OSR1/ZHX3/CEBPD/WNT7B/TFAP2A/BMP2/SUCO/TMEM119/DDR2/FZD9/ATRAID/ZBTB16/NPNT/GPM6B/WNT4/MSX2/LTF/TP63/TGFB2/IL6R	63
GO:0001736	establishment of planar polarity	biological process	86/9065	122/17381	2.66724e-05	0.000385869	0.000277746	1.35159	CDC42/WNT9B/DVL2/GPC4/PFN1/FOXF2/RHOA/PSMD9/WNT5A/AP2S1/DKK1/CLTC/PSME1/UBA52/PSMD3/UBB/AP2B1/PSMB2/AP2A2/TIAM1/DVL1/PSMD4/PSMD11/PSMC1/PSMB3/PSMA7/PSMC5/PTK7/SMURF1/AP2A1/PSMD2/UBC/PSMD6/PSMC4/PSMD1/PSME3/PSMD7/ABL1/VANGL1/SEC24B/PSMA2/DLG3/PSMD8/PSMD13/PSMC3/MED12/SFRP1/WNT1/RAC1/FZD4/VANGL2/PAFAH1B1/ZNRF3/FZD6/PRICKLE1/CELSR3/FZD7/PSMA5/FZD5/NPHP3/SMURF2/WDR1/PSMA1/RPS27A/PSMF1/ARRB2/AP2M1/AST…	86
GO:0007164	establishment of tissue polarity	biological process	86/9065	122/17381	2.66724e-05	0.000385869	0.000277746	1.35159	CDC42/WNT9B/DVL2/GPC4/PFN1/FOXF2/RHOA/PSMD9/WNT5A/AP2S1/DKK1/CLTC/PSME1/UBA52/PSMD3/UBB/AP2B1/PSMB2/AP2A2/TIAM1/DVL1/PSMD4/PSMD11/PSMC1/PSMB3/PSMA7/PSMC5/PTK7/SMURF1/AP2A1/PSMD2/UBC/PSMD6/PSMC4/PSMD1/PSME3/PSMD7/ABL1/VANGL1/SEC24B/PSMA2/DLG3/PSMD8/PSMD13/PSMC3/MED12/SFRP1/WNT1/RAC1/FZD4/VANGL2/PAFAH1B1/ZNRF3/FZD6/PRICKLE1/CELSR3/FZD7/PSMA5/FZD5/NPHP3/SMURF2/WDR1/PSMA1/RPS27A/PSMF1/ARRB2/AP2M1/AST…	86
GO:0003151	outflow tract morphogenesis	biological process	56/9065	74/17381	2.67479e-05	0.000385869	0.000277746	1.45099	MEF2C/HES1/GATA6/JUN/NRP1/HAND2/VEGFA/ZFPM2/DVL2/JAG1/BMP7/HIF1A/SMAD4/ILK/TGFBR2/BMPR2/NIPBL/TGFBR3/SIX1/NRP2/WNT5A/FGFR2/PARVA/FOLR1/TBX1/CTNNB1/TBX2/BMPR1A/PLXND1/FOXC1/SEC24B/LRP2/ATF2/RARB/SMAD6/RBPJ/SOX11/NOG/ZFPM1/HEY2/CITED2/TBX20/TWIST1/RARA/HEYL/ENG/NKX2-5/FOXH1/PITX2/FZD1/FZD2/DHRS3/MSX2/TGFB2/SOX17/TBX3	56
GO:1905897	regulation of response to endoplasmic reticulum stress	biological process	56/9065	74/17381	2.67479e-05	0.000385869	0.000277746	1.45099	HSPA1A/AGR2/SIRT1/BCL2L11/PMAIP1/LRRK2/BAX/HYOU1/TMEM33/PPP1R15B/SERINC3/PTPN1/UBAC2/CAV1/BAG6/RACK1/ERP29/XBP1/PARK7/UBQLN2/DERL2/UBQLN1/BOK/UBXN1/TMBIM6/USP19/COPS5/GRINA/SYVN1/HSPA5/ERN1/USP25/YOD1/USP13/EDEM1/DAB2IP/PIK3R1/DNAJC3/USP14/HERPUD1/BRSK2/BAK1/ATXN3/DDIT3/PRKN/UBE2G2/SELENOS/SVIP/SPOP/PPP1R15A/BFAR/CLU/BCAP31/SGTA/MAGEA3/PTPN2	56
GO:0048592	eye morphogenesis	biological process	100/9065	145/17381	2.6757e-05	0.000385869	0.000277746	1.32233	BCL2/RARG/ARID1A/ZEB1/PITX3/VEGFA/HMGN1/JAG1/NF1/BMP7/HIF1A/SOX9/SP3/NTRK2/PAX6/STAT3/FOXF2/NIPBL/BAX/EPHA2/WNT5A/FRS2/FBN1/C12orf57/MFN2/GNAT2/KDM2B/FOXN4/THY1/TSPAN12/AXIN1/HIPK2/SKI/COL5A1/CTNNB1/FBN2/TBX2/FJX1/YY1/TENM3/TSKU/HIPK1/COL5A2/PTPRM/PRDM1/RARB/SOX11/NECTIN1/TH/WNT2B/LRP6/FOXL2/WNT2/GLI3/OLFM3/BBS4/AGTPBP1/PROX2/IHH/FZD5/NECTIN3/CABP4/RDH13/SDK1/EGF/COL8A1/TWIST1/TULP1/TFAP2A/MFRP/E…	100
GO:1903828	negative regulation of cellular protein localization	biological process	103/9065	150/17381	2.71834e-05	0.000391348	0.00028169	1.3166	PPM1A/PICALM/TMSB4X/SUFU/LZTFL1/KCNE1/FAF1/MAPK7/CSK/CYLD/PPP2R5A/NF1/BMP7/NFKBIA/LRRK2/SNAI2/BARD1/NLRP3/WWTR1/CDT1/SOX4/GOPC/DMTN/SIN3A/G3BP2/EMD/SRI/CCDC22/CLTC/UBAC2/MTOR/TGFB1/PARP10/KEAP1/PARK7/DNAJA1/TMBIM1/HSPH1/PPFIA1/DERL2/PKIG/RANGAP1/VPS35/DYRK2/BCL2L1/TMEM59/GSK3B/AXIN2/NUMB/RAB23/YOD1/LEPROT/LEPROTL1/ABHD17C/LITAF/DAB2IP/SP100/RHOQ/MDFIC/BAG4/SIRT4/THRA/GDI1/PKD1/FBXW11/MAPT/MXI1/NE…	103
GO:1904589	regulation of protein import	biological process	118/9065	175/17381	2.72987e-05	0.000391882	0.000282074	1.29286	WNT3A/TLR2/CDKN1A/PPM1A/F2/EGFR/IGF1/TMSB4X/SUFU/MED1/FAF1/MAPK7/PIK3R2/APP/CYLD/NF1/ERBB4/BMP7/SMAD4/SIRT1/MAPK1/TLR4/NFKBIA/PTGS2/IFNG/LRRK2/SNAI2/RHOA/TGFBR1/NUP58/ECT2/HSP90AB1/CDK1/NLRP3/CDH1/SULF2/WWTR1/IL6/NUP62/JUP/G3BP2/EMD/FLNA/SRI/CCDC22/UBR5/BAMBI/MTOR/TRIM28/TGFB1/BMPR1A/HSPA8/PARP10/KEAP1/PARP1/NUTF2/MBTPS1/SMAD3/PKIG/SMO/DMAP1/TPR/PDCD5/MAVS/DYRK2/IPO5/OGG1/GSK3B/AXIN2/NODAL/IL18/T…	118
GO:0043281	regulation of cysteine-type endopeptidase activity involved in apoptotic process	biological process	137/9065	207/17381	2.73591e-05	0.000391882	0.000282074	1.26899	S100A9/WNT3A/FADD/CARD8/THBS1/ANP32B/CYR61/CASP9/KLF4/VEGFA/HSPD1/SOX2/FAS/ACVR1C/PPARG/SIRT1/BCL2L11/XIAP/PTGS2/CD44/CTGF/MGMT/PMAIP1/AKT1/CSNK2A1/MDM2/DDX3X/BAX/PRDX3/HMGB1/LEF1/SENP1/NLRP3/IL6/EGLN3/ARL6IP1/F3/DLC1/FNIP1/IFI27/SFN/SRC/CYCS/EPHA7/MYC/GPI/RACK1/BCL2L12/HTRA2/PRDX5/CASP2/CASP8AP2/YWHAE/GPX1/PARK7/RPS3/SMAD3/PAK2/RPS6KA1/TNFRSF10B/CDKN2D/APOPT1/BOK/PDCD5/RAF1/RAG1/ARRB1/PPM1F/VCP/…	137
GO:0021761	limbic system development	biological process	73/9065	101/17381	2.74544e-05	0.000391882	0.000282074	1.38583	DRD1/WNT3A/ZEB2/CDK6/NRP1/FGFR1/ETS1/EZH2/NF1/SRF/BAX/DLX1/LEF1/NF2/UQCRQ/LRP8/PAPD4/EZH1/KDM6B/BCAN/ARPC5/FGFR2/KIF5B/ATP2B4/UBA6/NR4A3/XRN2/EIF2B5/PHLPP2/YWHAE/XRCC1/MDK/TSC1/PTEN/DLX2/ID4/SMO/CASP3/GSK3B/BTG2/PAFAH1B1/CDK5R1/GLI3/PTPRS/BBS4/RAB3GAP1/SOX3/RARA/RAX/KIF14/DCLK2/MKKS/SRD5A1/NR2E1/PITX2/CNTNAP2/EMX2/LMX1A/TBR1/ATAT1/NKX2-1/POU3F2/PLXNA3/MFSD2A/ALDH1A3/PROX1/LHX5/BBS2/SEMA3A/TBX3/NC…	73
GO:0045446	endothelial cell differentiation	biological process	73/9065	101/17381	2.74544e-05	0.000391882	0.000282074	1.38583	MET/ACVR1/ROCK1/NRP1/ZEB1/NOTCH4/IKBKB/TJP1/JAG1/SMAD4/ACVR2B/MSN/NOTCH1/RAP1A/BMPR2/PDPN/ATOH8/APOLD1/TJP2/CLIC4/RAP2C/HEG1/HOXB5/KDM6B/RAP1B/F2RL1/RAPGEF2/EDF1/F11R/PLOD3/CTNNB1/GSTM3/GPX1/RAPGEF1/RDX/EZR/ICAM1/TNF/ROCK2/ARHGEF26/RBPJ/MARVELD2/S1PR1/PTPRS/S1PR2/PROX2/HEY2/MYADM/S1PR3/WNT7B/PPP1R16B/PDE4D/NR2F2/LAMA5/ENG/CLDN1/BTG1/ADD1/TMEM100/SCUBE1/VHLL/COL18A1/WNT7A/VEZF1/SOX17/PROX1/CDH5/AC…	73
GO:0006091	generation of precursor metabolites and energy	biological process	280/9065	455/17381	2.74604e-05	0.000391882	0.000282074	1.17992	CEBPA/AKT2/HDAC4/TPI1/MSH2/PHKB/UGDH/UGP2/SH3BGRL3/GPD2/ADPGK/PKM/IGF1/POM121/PGM2/MECP2/IRS1/P2RX7/PPARA/IGF2/HIF1A/HK2/STAT3/RB1CC1/AKT1/PRDM16/NDC1/HMGB1/MTFR2/NUP58/PHLDA2/CDK1/ATP5B/PTGES2/C1QTNF2/UQCRQ/COX10/PRKAA1/TXNRD1/NUP62/PRELID1/ALDH2/PYGB/NUP50/SUCLA2/NOP53/ACADVL/PDE12/POM121C/PRKAG1/NUP160/NDUFS4/NUP210/AIFM2/CALM1/CCNB1/NR4A3/CYCS/STK40/IDH3B/LDHA/COX6B1/GNAS/EPM2AIP1/MYC/UBA52/U…	280
GO:0090287	regulation of cellular response to growth factor stimulus	biological process	164/9065	253/17381	2.74997e-05	0.000391882	0.000282074	1.24288	HES1/GATA6/GATA4/HSPA1A/PPM1A/THBS1/SNX6/CYR61/ZEB1/CHST11/FGFR1/VEGFA/FGF2/PRKD2/CDKN1C/HIF1A/SMAD4/SIRT1/FLT1/XIAP/ILK/FGF9/TGFBR2/NOTCH1/DNM2/BMPR2/RUNX2/SMAD2/TGFBR1/PRDM16/DLX1/TMEM204/HSP90AB1/TGFBR3/SULF2/HHEX/STK11/DSTYK/GRB10/SPART/MTMR4/ACVR2A/WNT5A/RNF111/FBN1/SPRY2/FGFR2/CD63/DKK1/NPTN/CD109/GPC1/LEMD3/MYOCD/ITGA3/PTPN1/FOLR1/GATA3/NBL1/CAV1/BCL9L/UBA52/ZNF703/UBB/HIPK2/BAMBI/UBE2O/PD…	164
GO:0032259	methylation	biological process	220/9065	350/17381	2.90297e-05	0.000412934	0.000297227	1.20521	DNMT1/MYB/DNMT3A/DNMT3B/PWP1/EHMT2/EHMT1/ASH2L/BRCA1/EZH2/TRMT13/MECP2/PRMT5/MTA2/NSUN4/SPI1/SMAD4/SIRT1/MGMT/FOS/NSUN5/PRDM16/KMT5A/RBBP5/NSD2/MAT2A/COPRS/TYMS/TYW3/HIST1H1D/PHF19/VCPKMT/SETD1B/ICMT/KMT5B/ARID4B/KMT2D/SMYD2/EZH1/BMT2/JARID2/RAB6A/METTL7A/HIST1H1B/PAXBP1/DPY30/SMARCB1/GSTO1/FTSJ1/GATA3/CALM1/CARNMT1/WDR82/RPS2/GNAS/ATF7IP/KMT2A/SETD1A/TDRKH/NOP2/CHD5/HIST1H1E/TRIM28/TRMT2A/SMYD4/…	220
GO:0051017	actin filament bundle assembly	biological process	92/9065	132/17381	2.9075e-05	0.000412934	0.000297227	1.33635	STMN1/MET/CDC42/ROCK1/PAK1/TPM1/NRP1/SH3PXD2B/SDC4/TAC1/FSCN1/HSP90B1/ALMS1/DPYSL3/SRF/CTGF/PFN1/WASF2/LPAR1/RHOA/TGFBR1/ACTN1/NF2/SPIRE1/LIMA1/PPP1R9A/DLC1/DMTN/PLS3/MYO1B/ACTN4/SYNPO2L/PLS1/PHLDB2/MARCKS/LCP1/FRMD7/SRC/ARHGAP28/CORO1B/MTOR/BRAF/SORBS3/BAIAP2/ZYX/TSC1/SMAD3/PPFIA1/RDX/PDXP/SLC9A1/ABL1/EZR/ARRB1/PPM1F/SFRP1/RAC1/ROCK2/TNFAIP1/PTGER4/BAG4/PIK3R1/S1PR1/SYNPO2/LIMK1/BBS4/CUL3/NEDD9/…	92
GO:0043923	positive regulation by host of viral transcription	biological process	16/9065	16/17381	2.97808e-05	0.000422245	0.000303929	1.91737	JUN/EP300/HPN/LEF1/SMARCB1/SP1/RRP1B/SMARCA4/CHD1/NUCKS1/CTDP1/TAF11/ZNF639/CCNT1/TFAP4/SNW1	16
GO:0043620	regulation of DNA-templated transcription in response to stress	biological process	84/9065	119/17381	3.0388e-05	0.00043013	0.000309605	1.35344	CHEK1/ATF6/HSPA1A/JUN/DNAJB1/VEGFA/EP300/MAPK7/ATF6B/CREBBP/BACH1/HMOX1/TP53/HIF1A/CUL2/EGLN2/NOTCH1/CEBPB/SESN2/EGLN3/PSMD9/HIF1AN/SIN3A/HIGD1A/HIF3A/PSME1/UBA52/PSMD3/UBB/PSMB2/PSMD4/PSMD11/LIMD1/BCLAF1/PSMC1/PSMB3/PSMA7/PSMC5/RPS6KA1/PSMD2/UBC/PSMD6/PSMC4/PSMD1/PSME3/ATF3/PSMD7/ATF4/PSMA2/TMBIM6/PSMD8/PSMD13/PSMC3/HSPA5/UBE2D2/UBE2D1/RBPJ/MUC1/UBE2D3/EGR1/PSMA5/CITED2/PSMA1/VHL/RPS27A/PSMF1/KL…	84
GO:0002221	pattern recognition receptor signaling pathway	biological process	122/9065	182/17381	3.06015e-05	0.000431702	0.000310737	1.28527	S100A9/IRAK2/TLR2/FADD/ESR1/TRAF6/IRAK1/HSPA1A/WDFY1/UNC93B1/PRKCE/IKBKB/HSP90B1/HSPD1/CYLD/CHUK/TLR4/IKBKE/XIAP/NFKBIA/TBK1/HMGB1/S100A14/ERBIN/IRF7/ITGB2/RSAD2/F2RL1/NOP53/PTPN22/DDX60/ANKRD17/RIPK2/LGR4/CAV1/SEC14L1/LSM14A/UBA52/UBB/PDPK1/HSPA1B/UBE2N/TICAM1/MAPKAPK2/IFIH1/ITCH/TNIP1/UBC/PUM1/UBQLN1/NLRX1/C1QBP/CACTIN/LBP/MAVS/FLOT1/TAB2/IKBKG/MAP3K7/NR1H3/UBE2D2/MAP3K1/IRF4/DAB2IP/UBE2D1/UBE2…	122
GO:0032886	regulation of microtubule-based process	biological process	122/9065	182/17381	3.06015e-05	0.000431702	0.000310737	1.28527	STMN1/MET/WNT3A/PLK2/CCNF/CHEK1/CENPJ/HSPA1A/PDCD6IP/RHOT1/PAK1/BRCA1/CCSAP/KLHL42/MECP2/CYLD/CDKN1B/HNRNPU/ERBB2/MAPRE1/RASSF1/XPO1/PSRC1/SKA1/KIF11/BORA/TACC3/CLIP1/MID1IP1/GNAI1/NUP62/TCTEX1D2/PHLDB2/CLTC/CHMP2A/TBCD/CEP120/SMC3/FKBP4/ARHGEF2/HSPA1B/CTNNB1/SMC1A/DYNC1H1/RANBP3/MID1/PLK1/RANBP2/NPM1/CAMSAP1/RBM14/RPS3/STAG2/SKA3/TPX2/BICD2/CDK5RAP2/ABL1/TPR/TRIM37/AURKA/CAMSAP3/APC/BICD1/STMN3/…	122
GO:0016202	regulation of striated muscle tissue development	biological process	98/9065	142/17381	3.06726e-05	0.000431981	0.000310937	1.32326	MEF2C/GATA6/WNT3A/HDAC4/BCL2/PAK1/FGF20/IGF1/GJA1/DDX5/G6PD/SOX6/FGFR1/ERBB3/FGF2/PIM1/ZFPM2/TSC22D3/EDN1/ERBB4/SMAD4/CREB1/FGF9/TGFBR2/TP73/NOTCH1/TGFBR1/LEF1/TGFBR3/CDK1/SIX1/HMGCR/SIX4/PRKAA1/JARID2/FRS2/FGFR2/DKK1/CENPF/GPC1/MYOCD/CCNB1/MTOR/TBX1/NR1D2/DDX17/GSK3A/CTNNB1/TGFB1/TBX2/BMPR1A/MTPN/CTDP1/YBX3/SMAD3/PTEN/EFNB2/USP19/FBXO22/FLOT1/WNT10B/GLI1/RPS6KB1/DDX39B/RBPJ/NOG/PIN1/WNT2/FZD7/MY…	98
GO:2001020	regulation of response to DNA damage stimulus	biological process	119/9065	177/17381	3.10412e-05	0.000436442	0.000314148	1.28908	SPRED1/CDK9/CHEK1/MCL1/EGFR/BRCA1/CASP9/DDX5/ATM/HMGA2/RAD51/IER3/NEK4/SIRT1/OTUB1/CD44/MGMT/PMAIP1/SNAI2/MDM2/CXCL12/TAF9/HMGB1/KMT5A/NSD2/POLQ/ZNF365/PCNA/NACC2/RPA2/SMYD2/TEX15/ZNF385A/SPRED2/UBR5/DYRK1A/RAD9A/TIMELESS/MYC/CCAR2/KLHL15/BCL2L12/TRIM28/DDX11/MIF/UBE2N/BCLAF1/NPM1/RIF1/RNF168/TPT1/XRCC1/BRCC3/PARP1/TIGAR/RPS3/RPL26/TAF9B/CUL4A/TRIP12/CDKN2D/APBB1/FIGN/ABL1/DEK/PPP4R2/FEM1B/THOC5/…	119
GO:1903363	negative regulation of cellular protein catabolic process	biological process	52/9065	68/17381	3.1341e-05	0.000439923	0.000316654	1.46623	ANXA2/SUFU/FHIT/N4BP1/TAF9/HSP90AB1/SENP1/EPHA4/BAG5/NOP53/SMARCC1/UBAC2/CCAR2/BAG6/PARK7/ATP13A2/SCO1/DERL2/CLEC16A/VPS35/UBXN1/RPL5/RPS7/USP19/RGP1/USP25/EFNA1/WNT1/HFE/WAC/YOD1/DAB2IP/SDCBP/LAPTM4B/ALAD/USP14/RYBP/PSMF1/FURIN/TRIM39/TLK2/UBE2G2/OPHN1/ATRAID/SVIP/SHH/GIPC1/PDCL3/KLHL40/TAF1/SGTA/RPL23	52
GO:0010165	response to X-ray	biological process	30/9065	35/17381	3.18162e-05	0.00044585	0.00032092	1.64346	CCND2/CCND1/CDKN1A/ANXA1/MSH2/BRCA2/ATM/HMGA2/RAD51/TP53/TP73/DNM2/NIPBL/BLM/GATA3/BRCC3/NUCKS1/XRCC6/XRCC5/IKBIP/CASP3/SFRP1/TP53BP1/KARS/ERCC1/ERCC8/XRCC2/XRRA1/THBD/TP63	30
GO:0042147	retrograde transport, endosome to Golgi	biological process	59/9065	79/17381	3.25491e-05	0.000454608	0.000327224	1.43196	RAB9B/SNX6/SNX1/LRRK2/FAM109B/GBF1/ANKFY1/ARL1/TRAPPC10/RAB6A/VPS53/TMEM87A/AP1S1/CLTC/RAB29/ERC1/PIKFYVE/UBE2O/STX16/TBC1D10B/TRIM27/PLEKHJ1/WASHC2C/GCC2/GOSR1/SPAG9/RAB7A/WASH3P/VPS35/EVI5/VPS51/RGP1/ZFYVE21/VAMP3/TBC1D5/RAB6B/EHD3/STX6/RNF126/RHOBTB3/VPS52/SNX5/PRKN/RAB9A/MAGEL2/RAB41/RAB6C/YKT6/GOSR2/TMEM87B/SNX2/SGSM2/VTI1A/VPS54/TBC1D14/RAB7B/VPS26B/RBSN/FAM109A	59
GO:1903076	regulation of protein localization to plasma membrane	biological process	59/9065	79/17381	3.25491e-05	0.000454608	0.000327224	1.43196	WNT3A/LRP1/PICALM/EGFR/RAB11FIP2/PRKCE/CSK/AGR2/PPP2R5A/IFNG/AKT1/CSNK2A1/EPHA2/PRNP/VAMP8/GOPC/RAB11A/KIF5B/PLS1/CLTC/ITGA3/ITGB1/PDPK1/RACK1/TGFB1/VPS4A/STX7/TMBIM1/SPTBN1/APPL1/PPFIA1/EZR/BCL2L1/TMEM59/AR/NUMB/ARF6/SQSTM1/RHOQ/PIK3R1/RER1/CNST/PRKCH/INS/ACSL3/WNK3/EPHB2/AP2M1/NKD2/KCNJ11/DAB2/RHOG/LYPLA1/LRRC15/STX4/LDLRAP1/DLG1/STX3/GPER1	59
GO:0071426	ribonucleoprotein complex export from nucleus	biological process	90/9065	129/17381	3.32474e-05	0.000463592	0.000333691	1.3377	POM121/SRSF11/CPSF1/SRSF9/SRSF1/SRSF7/DDX39A/NDC1/POLR2D/XPO1/NUP58/NMD3/RBM8A/HHEX/WDR33/GLE1/SRSF2/RAN/SRSF3/NUP62/SRSF6/SRRM1/SYMPK/CPSF3/SLBP/SRSF4/ZC3H11A/NUP50/NOP53/POM121C/EIF4E/NUP160/NUP210/XPOT/SRSF5/NUP153/U2AF2/RNPS1/SMG5/NCBP2/RANBP2/NPM1/SMG1/PABPN1/NUP214/CASC3/AAAS/TSC1/NUP37/IWS1/NOL6/CHTOP/EIF4A3/NXT1/POLDIP3/SMG6/AKAP8L/TPR/CPSF2/NUPL2/THOC5/THOC1/HNRNPA2B1/NUP98/RPS15/NUP43/S…	90
GO:0071359	cellular response to dsRNA	biological process	50/9065	65/17381	3.36263e-05	0.00046579	0.000335273	1.4749	ESR1/EGFR/DDX5/ADAR/MAP2K1/P2RX7/NFKB1/NCOR2/DICER1/SMAD2/TERT/MYCN/AGO1/IFIT1/RALB/PDE12/DROSHA/PQBP1/SRRT/LIN28B/CAV1/TGFB1/NPM1/ZC3H7B/SMAD3/IFIH1/PUM1/DGCR8/AGO2/MAVS/FLOT1/SPOUT1/HNRNPA2B1/ZCCHC11/SMAD1/TARBP2/AGO4/TSN/TRIM71/RIOK3/DDX58/LIN28A/TLR3/MUL1/ZC3H10/AGO3/MAP2K2/PUM2/COLEC12/IFNB1	50
GO:0072413	signal transduction involved in mitotic cell cycle checkpoint	biological process	50/9065	65/17381	3.36263e-05	0.00046579	0.000335273	1.4749	PLK2/CDKN1A/E2F1/CENPJ/ATM/EP300/CNOT6/CDKN1B/TP53/MDM2/BAX/GADD45A/CDK1/PCNA/SOX4/TNKS1BP1/CNOT4/ZNF385A/SFN/CCNB1/UBA52/UBB/CNOT1/E2F8/NPM1/CASP2/CNOT8/CNOT9/RPL26/UBC/PRMT1/AURKA/CNOT6L/CDK2/E2F4/CNOT11/CARM1/BTG2/TFDP1/RBL2/ARID3A/MDM4/TFDP2/CHEK2/MUC1/RPS27A/E2F7/CNOT2/CRADD/TRIAP1	50
GO:1902402	signal transduction involved in mitotic DNA damage checkpoint	biological process	50/9065	65/17381	3.36263e-05	0.00046579	0.000335273	1.4749	PLK2/CDKN1A/E2F1/CENPJ/ATM/EP300/CNOT6/CDKN1B/TP53/MDM2/BAX/GADD45A/CDK1/PCNA/SOX4/TNKS1BP1/CNOT4/ZNF385A/SFN/CCNB1/UBA52/UBB/CNOT1/E2F8/NPM1/CASP2/CNOT8/CNOT9/RPL26/UBC/PRMT1/AURKA/CNOT6L/CDK2/E2F4/CNOT11/CARM1/BTG2/TFDP1/RBL2/ARID3A/MDM4/TFDP2/CHEK2/MUC1/RPS27A/E2F7/CNOT2/CRADD/TRIAP1	50
GO:1902403	signal transduction involved in mitotic DNA integrity checkpoint	biological process	50/9065	65/17381	3.36263e-05	0.00046579	0.000335273	1.4749	PLK2/CDKN1A/E2F1/CENPJ/ATM/EP300/CNOT6/CDKN1B/TP53/MDM2/BAX/GADD45A/CDK1/PCNA/SOX4/TNKS1BP1/CNOT4/ZNF385A/SFN/CCNB1/UBA52/UBB/CNOT1/E2F8/NPM1/CASP2/CNOT8/CNOT9/RPL26/UBC/PRMT1/AURKA/CNOT6L/CDK2/E2F4/CNOT11/CARM1/BTG2/TFDP1/RBL2/ARID3A/MDM4/TFDP2/CHEK2/MUC1/RPS27A/E2F7/CNOT2/CRADD/TRIAP1	50
GO:0014013	regulation of gliogenesis	biological process	74/9065	103/17381	3.40367e-05	0.000469929	0.000338252	1.37753	CXCR4/NTRK3/HES1/MYB/TLR2/PLAG1/SLC45A3/F2/PITX3/CERS2/EZH2/APP/LIF/PRMT5/CSF1/NF1/DICER1/PPARG/CREB1/TP73/IFNG/NOTCH1/LDLR/DLX1/TERT/TNFRSF21/ZNF365/CDK1/NF2/MYCN/EPHA4/HDAC2/CDH2/RHEB/SKI/MTOR/TIAM1/CTNNB1/RNF10/TENM4/PRPF19/DLX2/ID4/SERPINE2/LRP2/NKX6-1/IDH2/PTPRZ1/IL6ST/SOX11/NOG/LIN28A/ASCL2/PRKCH/LYN/ABCC8/UFL1/ASPA/EMX1/WDR1/NKX2-2/BMP2/NKX6-2/MAG/NR2E1/SHH/ZNF488/RELA/DUSP10/C16orf45/MBD1…	74
GO:2001237	negative regulation of extrinsic apoptotic signaling pathway	biological process	74/9065	103/17381	3.40367e-05	0.000469929	0.000338252	1.37753	ACVR1/FADD/BCL2/HSPA1A/MCL1/THBS1/NRP1/IGF1/BRCA1/MAPK7/PEA15/HMOX1/FAS/SERPINE1/RB1CC1/AKT1/SNAI2/TGFBR1/STRADB/TERT/GSTP1/ITGA6/CTTN/SRC/ITGAV/PHIP/ARHGEF2/HSPA1B/LGALS3/CTNNA1/HTT/UNC5B/GPX1/PARK7/TMBIM1/TNFRSF10B/PSME3/RAF1/GCLM/BCL2L1/RFFL/AR/ICAM1/TNF/ZMYND11/RPS6KB1/TCF7L2/FYN/IL7/TNFAIP3/SH3RF1/GFRAL/TRAF2/EYA3/FGB/GDNF/DAPK1/SIAH2/TNFRSF10A/HMGB2/FASLG/RELA/PELI3/FAIM2/CASP8/RNF34/CX3CL1…	74
GO:0001837	epithelial to mesenchymal transition	biological process	93/9065	134/17381	3.43185e-05	0.000473045	0.000340495	1.33072	ACVR1/PDCD4/DDX5/HMGA2/EZH2/HPN/COL1A1/BMP7/HIF1A/SMAD4/SOX9/TGFBR2/NOTCH1/SNAI2/PDPN/SMAD2/FOXF2/TGFBR1/LEF1/TGFBR3/WWTR1/RFLNB/ERG/WNT5A/FGFR2/HDAC2/PHLDB2/HNRNPAB/BCL9L/ZNF703/PEF1/BAMBI/TCOF1/MTOR/TIAM1/TRIM28/DDX17/CTNNB1/TGFB1/FOXC1/SMAD3/PTEN/NOLC1/SPRY1/CRB2/PPP2CA/KLHL12/AMELX/ADIPOR1/SFRP1/ADAM15/EFNA1/GSK3B/AXIN2/DAB2IP/RBPJ/SDCBP/NOG/HAS2/SMAD7/LRP6/SNAI1/WNT2/GREM1/HEY2/POFUT2/TWIST1…	93
GO:0006888	ER to Golgi vesicle-mediated transport	biological process	123/9065	184/17381	3.45894e-05	0.000475465	0.000342237	1.28172	ACTR1A/SEC23IP/F2/CTSC/ARCN1/TRAPPC3/ARF4/USO1/GOLGB1/TEX261/TMED7/VAPA/HYOU1/SEC31A/GBF1/TMED2/SEC23A/GAS1/GOPC/DYNLL2/RAB1B/PPP6R3/SEC23B/CAPZB/IER3IP1/TRAPPC10/BGLAP/CAPZA1/KDELR1/DYNC1LI1/COPG1/BCAP29/COPZ1/CNIH4/COPB1/FOLR1/SEC16A/VAMP7/ARF1/PEF1/COPA/BET1/TRAPPC12/TMEM115/DYNC1H1/MCFD2/NSF/INSIG1/TFG/GOSR1/SPTBN1/YIPF5/SPTBN2/COPE/TMED9/SPTAN1/VAPB/SPTB/KLHL12/DCTN5/SEC24B/SCFD1/COG8/COG2/D…	123
GO:0072089	stem cell proliferation	biological process	82/9065	116/17381	3.4607e-05	0.000475465	0.000342237	1.35539	WNT3A/FGFR1/VEGFA/HMGA2/FGF2/HNRNPU/NF1/HIF1A/ARTN/NOTCH1/PAX6/LRRK2/SNAI2/RACGAP1/LEF1/TERT/ASPM/DAGLB/NF2/WNT5A/FRS2/NKAP/SOX5/FGFR2/PLXNB2/RAB10/SETD1A/NDE1/ARHGEF2/KCTD11/CTNNB1/TGFB1/CTNNA1/N4BP2L2/CTC1/LTBP3/ID4/SMO/ARIH2/SART3/DGCR8/FBLN1/WNT10B/WNT1/PDCD2/YAP1/NUMB/ZFP36L1/PAFAH1B1/ZNRF3/SOX11/TRIM71/FOXG1/SMARCD3/WNT2B/ABCB1/GLI3/DISC1/HHIP/WNT7B/WNT3/ATXN1L/AGO3/SIX3/OVOL1/FZD9/ETV6/RUN…	82
GO:0051983	regulation of chromosome segregation	biological process	69/9065	95/17381	3.47739e-05	0.00047698	0.000343327	1.39262	CDC42/TTK/ATM/HNRNPU/RB1/CSNK2A1/UBE2C/RACGAP1/TRIP13/NDC80/ECT2/BUB1B/CDCA5/CDC6/CDT1/TACC3/ESPL1/FEN1/RCC2/DYNC1LI1/MKI67/MAD2L1/CENPF/ZNF207/KIF2C/CSNK2A2/CCNB1/WAPL/TTL/TNKS/DDX11/CTNNB1/DYNC1H1/ATRX/PLK1/IK/SFPQ/KLHL22/PUM1/TPR/PTTG1/APC/NAA10/BUB1/AURKB/DUSP1/AXIN2/KNSTRN/BUB3/BECN1/CDC27/CUL3/RAD21/SMC5/DLGAP5/USP44/PUM2/RAD18/CDC23/CTCF/XRCC3/SLF1/NSMCE2/CCDC36/HECW2/HDAC8/GEN1/NUMA1/NEK2	69
GO:1902686	mitochondrial outer membrane permeabilization involved in programmed cell death	biological process	48/9065	62/17381	3.58209e-05	0.000490542	0.000353089	1.48442	E2F1/BCL2/HSPA1A/RHOT1/YWHAQ/TP53/BCL2L11/TP73/YWHAZ/PMAIP1/MAPK8/BAX/DYNLL2/YWHAH/SFN/TMEM14A/RHOT2/NMT1/GSK3A/PPP3R1/PPP1R13B/YWHAE/SLC25A5/RTL10/ATPIF1/BOK/YWHAB/ACAA2/ATF2/GSK3B/PPIF/TFDP1/YWHAG/TFDP2/SLC35F6/BMF/HIP1R/MUL1/BLOC1S2/DYNLL1/BAK1/FZD9/MOAP1/STPG1/BID/TP63/MPV17L/CASP8	48
GO:0048511	rhythmic process	biological process	200/9065	316/17381	3.60276e-05	0.000492038	0.000354166	1.21353	NTRK3/FOXO3/ESR1/ANXA1/BCL2/JUN/SOD1/EGFR/AXL/DDX5/ATM/EGR2/VEGFA/EP300/ETS1/EZH2/HNRNPD/RBM4/KLF10/PRMT5/CPT1A/CREBBP/PPARA/HNRNPU/CLOCK/FAS/TP53/PPARG/NRIP1/SMAD4/PDGFRA/CREB1/SERPINE1/SIRT1/HDAC1/NTRK2/KLF9/CSNK2A1/MMP7/MAPK8/CEBPB/CDK4/BAX/NFKB2/FANCG/ARNTL2/TOP2A/TYMS/PCNA/ENOX2/BTRC/PHLPP1/IL6/CRY2/AHR/PRKAA1/FBXL3/TEF/KIT/PGR/NFYA/SIN3A/OXTR/HDAC2/SRC/CBX3/DYRK1A/LGR4/SP1/TIMELESS/KMT2A/CC…	200
GO:0032881	regulation of polysaccharide metabolic process	biological process	32/9065	38/17381	3.61053e-05	0.000492038	0.000354166	1.61463	AKT2/IGF1/IRS1/NFKB1/IGF2/AKT1/HMGB1/PHLDA2/C1QTNF2/CLTC/EPM2AIP1/MTOR/GSK3A/TGFB1/PPP1CB/AP2A1/DYRK2/GSK3B/PPP1R3D/HAS2/INS/EGF/PHKG2/PDGFB/INSR/SELENOS/ESRRB/PPP1R3B/ENPP1/IRS2/PPP1R3F/GCK	32
GO:0060412	ventricular septum morphogenesis	biological process	32/9065	38/17381	3.61053e-05	0.000492038	0.000354166	1.61463	HES1/ACVR1/ZFPM2/SMAD4/TGFBR2/NOTCH1/BMPR2/TGFBR1/NSD2/TGFBR3/SOX4/WNT5A/FGFR2/VANGL2/SOX11/NOG/FGFRL1/SMAD7/ZFPM1/HEY2/CITED2/HEYL/NKX2-5/EGLN1/PITX2/FZD1/FZD2/TGFB2/PROX1/SAV1/HEY1/TBX3	32
GO:0009135	purine nucleoside diphosphate metabolic process	biological process	85/9065	121/17381	3.6451e-05	0.000495146	0.000356403	1.34692	HDAC4/TPI1/ADPGK/PKM/IGF1/POM121/P2RX7/PPARA/HIF1A/HK2/SCRIB/STAT3/NDC1/NUP58/TJP2/PRKAA1/NUP62/NUP50/POM121C/PRKAG1/NUP160/NUP210/LDHA/GPI/NUP153/ENO1/PFKP/GAPDH/OGDHL/RANBP2/PPARGC1A/PGAM1/ALDOA/PFKFB4/TIGAR/NUP214/AAAS/NUP37/BPGM/TPR/AK2/NUPL2/DLG3/PRKAA2/HK1/MPP2/NUP98/NUP43/DDIT4/OGT/PGK1/PFKFB2/INS/ENO2/NUP205/NUP155/SEH1L/PGM2L1/PGAM4/NUP54/INSR/EIF6/CASK/ENO4/NUP93/MAGI3/ESRRB/ENTPD5/NUP1…	85
GO:0009179	purine ribonucleoside diphosphate metabolic process	biological process	85/9065	121/17381	3.6451e-05	0.000495146	0.000356403	1.34692	HDAC4/TPI1/ADPGK/PKM/IGF1/POM121/P2RX7/PPARA/HIF1A/HK2/SCRIB/STAT3/NDC1/NUP58/TJP2/PRKAA1/NUP62/NUP50/POM121C/PRKAG1/NUP160/NUP210/LDHA/GPI/NUP153/ENO1/PFKP/GAPDH/OGDHL/RANBP2/PPARGC1A/PGAM1/ALDOA/PFKFB4/TIGAR/NUP214/AAAS/NUP37/BPGM/TPR/AK2/NUPL2/DLG3/PRKAA2/HK1/MPP2/NUP98/NUP43/DDIT4/OGT/PGK1/PFKFB2/INS/ENO2/NUP205/NUP155/SEH1L/PGM2L1/PGAM4/NUP54/INSR/EIF6/CASK/ENO4/NUP93/MAGI3/ESRRB/ENTPD5/NUP1…	85
GO:0006757	ATP generation from ADP	biological process	72/9065	100/17381	3.84632e-05	0.000521638	0.000375472	1.38051	HDAC4/TPI1/ADPGK/PKM/IGF1/POM121/P2RX7/PPARA/HIF1A/HK2/STAT3/NDC1/NUP58/PRKAA1/NUP62/NUP50/POM121C/PRKAG1/NUP160/NUP210/LDHA/GPI/NUP153/ENO1/PFKP/GAPDH/OGDHL/RANBP2/PPARGC1A/PGAM1/ALDOA/PFKFB4/TIGAR/NUP214/AAAS/NUP37/BPGM/TPR/NUPL2/PRKAA2/HK1/NUP98/NUP43/DDIT4/OGT/PGK1/PFKFB2/INS/ENO2/NUP205/NUP155/SEH1L/PGM2L1/PGAM4/NUP54/INSR/EIF6/ENO4/NUP93/ESRRB/ENTPD5/NUP188/MLXIPL/DHTKD1/ALDOC/NUP85/CBFA2T3…	72
GO:0030217	T cell differentiation	biological process	147/9065	225/17381	3.89341e-05	0.000527175	0.000379457	1.25268	MYB/HLA-G/FADD/ANXA1/BCL2/CDK6/SOD1/FOXP1/MAFB/AP3D1/AP3B1/ZEB1/PREX1/PNP/CYLD/NFATC2/FAS/ERBB2/SRF/SP3/TGFBR2/IFNG/STAT3/RUNX2/CD46/ZFP36L2/FANCA/HMGB1/LEF1/NLRP3/FANCD2/SOX4/IL6/STK11/CBFB/BCL11B/KIT/NKAP/RSAD2/CCR9/CD80/PRELID1/DTX1/KDELR1/DROSHA/PTPN22/GLI2/GATA3/RIPK2/IL2/TMEM131L/RPS6/BRAF/CTNNB1/TGFB1/XBP1/DNAJA3/TSC1/NRARP/STAT5B/SYK/IL4R/ABL1/ZC3H8/CLPTM1/ITPKB/RAG1/PPP3CB/PIK3CD/PLA2G2D…	147
GO:0071901	negative regulation of protein serine/threonine kinase activity	biological process	91/9065	131/17381	3.92911e-05	0.000530303	0.000381709	1.33192	SPRED1/CEBPA/CDKN1A/PDCD4/RGS3/MAPK7/PRKAR2A/CDKN1C/CDKN1B/NF1/BMP7/SIRT1/CDKN2A/TP73/HMGCR/HHEX/DUSP8/NUP62/SPRED2/GSTP1/SPRY2/PTPN22/MYOCD/HIPK3/PTPN1/SFN/CAV1/DUSP7/DUSP18/PLK1/DUSP3/DNAJA1/UCHL1/PTEN/FAM212B/WNK1/PRKAR1A/HEXIM1/SPRY1/PKIG/CDKN2D/ABL1/PPP2CA/APC/CASP3/SFRP1/DUSP1/APOE/DUSP5/PTPRJ/KAT2B/PRKCD/YWHAG/DAB2IP/LRP6/MAPK8IP1/LYN/DUSP16/DUSP4/TNFAIP3/LAX1/MEN1/GBA/DUSP19/STK38/NR2F2/L…	91
GO:1900182	positive regulation of protein localization to nucleus	biological process	91/9065	131/17381	3.92911e-05	0.000530303	0.000381709	1.33192	WNT3A/TLR2/F2/EGFR/IGF1/MED1/PIK3R2/APP/LIF/ERBB4/SMAD4/MAPK1/TLR4/PTGS2/IFNG/AKT1/LRRK2/RHOA/TGFBR1/ECT2/HSP90AB1/TERT/NMD3/SESN2/CDK1/CDH1/SULF2/CCT3/IL6/STK11/CD2AP/JUP/FLNA/UBR5/SRC/BAMBI/TRIM28/TGFB1/BMPR1A/CCT5/PLK1/NPM1/CCT7/PARK7/PARP1/MCRS1/NUTF2/CCT4/CCT2/SMAD3/CCT6A/SMO/TCP1/DMAP1/PINX1/TPR/MAVS/IPO5/NODAL/IL18/TNF/PRKCD/KAT7/F2R/TRIM8/PIK3R1/DDX58/FYN/TLR7/TLR3/GLI3/INS/GREM1/SEMA5A/D…	91
GO:0043618	regulation of transcription from RNA polymerase II promoter in response to stress	biological process	80/9065	113/17381	3.93943e-05	0.000530846	0.0003821	1.35743	CHEK1/ATF6/HSPA1A/JUN/DNAJB1/VEGFA/EP300/MAPK7/ATF6B/CREBBP/BACH1/HMOX1/TP53/HIF1A/CUL2/EGLN2/NOTCH1/CEBPB/SESN2/EGLN3/PSMD9/HIF1AN/SIN3A/HIGD1A/HIF3A/PSME1/UBA52/PSMD3/UBB/PSMB2/PSMD4/PSMD11/LIMD1/PSMC1/PSMB3/PSMA7/PSMC5/PSMD2/UBC/PSMD6/PSMC4/PSMD1/PSME3/ATF3/PSMD7/ATF4/PSMA2/TMBIM6/PSMD8/PSMD13/PSMC3/HSPA5/UBE2D2/UBE2D1/RBPJ/MUC1/UBE2D3/EGR1/PSMA5/CITED2/PSMA1/VHL/RPS27A/PSMF1/KLF2/EPAS1/ELOC/P…	80
GO:0061572	actin filament bundle organization	biological process	94/9065	136/17381	4.02988e-05	0.000542167	0.000390249	1.32524	STMN1/MET/CDC42/ROCK1/PAK1/TPM1/NRP1/SH3PXD2B/SHTN1/SDC4/TAC1/FSCN1/HSP90B1/ALMS1/DPYSL3/SRF/CTGF/PFN1/WASF2/LPAR1/RHOA/TGFBR1/ACTN1/RFLNB/NF2/SPIRE1/LIMA1/PPP1R9A/DLC1/DMTN/PLS3/MYO1B/ACTN4/SYNPO2L/PLS1/PHLDB2/MARCKS/LCP1/FRMD7/SRC/ARHGAP28/CORO1B/MTOR/BRAF/SORBS3/BAIAP2/ZYX/TSC1/SMAD3/PPFIA1/RDX/PDXP/SLC9A1/ABL1/EZR/ARRB1/PPM1F/SFRP1/RAC1/ROCK2/TNFAIP1/PTGER4/BAG4/PIK3R1/S1PR1/SYNPO2/LIMK1/BBS4…	94
GO:0002011	morphogenesis of an epithelial sheet	biological process	42/9065	53/17381	4.09223e-05	0.000548729	0.000394972	1.51943	CYR61/LIN7C/DDR1/DVL2/JAG1/BMP7/SRF/CD44/NOTCH1/PDPN/RHOA/ARHGAP12/MPP5/WNT5A/FLNA/PHLDB2/PDCD10/RHOC/MTOR/DVL1/COL5A1/PTEN/MEGF8/RREB1/ITGA5/VANGL2/SOX11/LRP6/TOR1A/PLET1/TBX20/CLASP1/ADAM17/WNT7A/ARHGAP35/MSX2/HBEGF/PHACTR4/SOS1/ACVRL1/TMEFF2/DLL4	42
GO:0006984	ER-nucleus signaling pathway	biological process	36/9065	44/17381	4.09936e-05	0.000548729	0.000394972	1.56876	ATF6/FBXW7/HSP90B1/AGR2/ATF6B/CXCL8/TP53/TMEM33/PPP1R15B/CALR/PTPN1/CCL2/CCDC47/XBP1/INSIG1/MBTPS1/ATF3/BOK/ATF4/EIF2A/ERLIN1/ATP2A2/HSPA5/GSK3B/EIF2S1/TMCO1/INSIG2/HERPUD1/DDIT3/SELENOS/ATG10/PPP1R15A/IGFBP1/MBTPS2/LMNA/PTPN2	36
GO:0007077	mitotic nuclear envelope disassembly	biological process	36/9065	44/17381	4.09936e-05	0.000548729	0.000394972	1.56876	POM121/NDC1/NUP58/CDK1/NUP62/EMD/NUP50/POM121C/NUP160/CTDNEP1/NUP210/CCNB1/NUP153/PLK1/RANBP2/NUP214/AAAS/PRKCA/NUP37/NEK9/TPR/NUPL2/NUP98/NUP43/CNEP1R1/NUP205/NUP155/SEH1L/NUP54/NUP93/NUP188/PRKCB/NUP85/NUP35/LMNA/LPIN1	36
GO:2000736	regulation of stem cell differentiation	biological process	97/9065	141/17381	4.10471e-05	0.000548729	0.000394972	1.31904	LMO2/HES1/GATA6/WNT3A/MYB/GATA4/H3F3B/CDK6/PWP1/HIST1H3B/SOX6/HNRNPU/JAG1/BMP7/SPI1/SOX9/PDGFRA/TP73/NOTCH1/STAT3/CDK13/ZFP36L2/PSMD9/CBFB/SOX5/HIST2H3A/YTHDF2/HIST2H3D/PSME1/HIST2H3C/GATA3/KMT2A/UBA52/SETD1A/PSMD3/UBB/HIST1H3D/PSMB2/CDK12/PSMD4/PSMD11/N4BP2L2/PSMC1/HIST2H4B/HIST1H4E/KDM3A/PSMB3/PSMA7/LTBP3/FOXC1/TEAD2/PSMC5/HIST1H3H/ITCH/PSMD2/UBC/PSMD6/PSMC4/PSMD1/PSME3/PSMD7/ABL1/TCF3/PSMA2/PS…	97
GO:0022407	regulation of cell-cell adhesion	biological process	262/9065	425/17381	4.11497e-05	0.000549228	0.000395331	1.182	HES1/WNT3A/MYB/HLA-G/CDC42/FADD/ANXA1/TRAF6/PAK1/SOD1/MAP3K8/GRB2/AP3D1/AP3B1/IGF1/ZEB1/SDC4/KLF4/MAPK7/PNP/ETS1/CSK/HSPD1/PTK2/VCAM1/CYLD/PPARA/NFATC2/SOX2/CD40LG/IGF2/ERBB2/BMP7/PIEZO1/IGFBP2/CD44/PODXL/TGFBR2/IFNG/AKT1/SNAI2/PDPN/CXCL12/CD46/CEBPB/FANCA/HMGB1/LEF1/PRNP/TNFRSF21/NLRP3/CDH1/RAC2/FANCD2/NF2/IL6/CBFB/YES1/WNT5A/NKAP/CD80/PRELID1/DMTN/ITGA6/FLOT2/DTX1/LGALS1/YTHDF2/DROSHA/PTPN22/GL…	262
GO:0030878	thyroid gland development	biological process	22/9065	24/17381	4.14713e-05	0.000552644	0.00039779	1.75759	HOXA5/MAP2K1/SRF/MAPK3/MAPK1/SIX1/HOXA3/HHEX/TBX1/BRAF/SMAD3/RAF1/THRA/PAX8/TG/HOXD3/NKX2-5/HOXB3/SHH/FOXE1/NKX2-1/DUOX2	22
GO:0033260	nuclear DNA replication	biological process	40/9065	50/17381	4.17139e-05	0.000553456	0.000398374	1.5339	PRIM1/POLA2/BRCA2/FGFR1/RAD51/GMNN/RFC5/POLA1/DONSON/RFC4/GINS2/POLD1/POLE/PCNA/CDT1/POLE2/FEN1/RPA2/GINS1/SLBP/ORC3/RFC2/POLD3/CDC45/ATRX/RFC1/BCL6/CHEK2/UPF1/TIPIN/WIZ/DNA2/POLE3/TERF1/TERF2/INO80/PRIM2/POLE4/POLD4/RPA1	40
GO:0000060	protein import into nucleus, translocation	biological process	38/9065	47/17381	4.1795e-05	0.000553456	0.000398374	1.55022	CDKN1A/POLA2/IGF1/MED1/SIRT1/MAPK1/NFKBIA/IFNG/AKT1/LRRK2/HSP90AB1/CDK1/TNPO2/IL6/RAN/SEC61B/UBR5/KPNB1/OPRD1/TGFB1/CEP57/PARP10/IPO4/NUTF2/PHB2/MAVS/IPO5/OGG1/BCL6/TNF/TNPO1/BCL3/SIX3/ARNTL/RBM22/RANBP6/ABRA/PDE2A	38
GO:0032648	regulation of interferon-beta production	biological process	38/9065	47/17381	4.1795e-05	0.000553456	0.000398374	1.55022	TLR2/TLR4/TBK1/DDX3X/HMGB1/IRF7/NMI/RIPK2/RNF216/TICAM1/IFIH1/YY1/NLRX1/CACTIN/MAVS/FLOT1/IFNAR1/RIOK3/DDX58/POLR3G/TLR7/TLR3/PTPRS/ZBTB20/REL/TRAF3/PYCARD/TRAF3IP1/POLR3A/HMGB2/PPM1B/IRF1/RNF135/POLR3F/POLR3D/NLRC3/TIRAP/LILRB1	38
GO:0045599	negative regulation of fat cell differentiation	biological process	38/9065	47/17381	4.1795e-05	0.000553456	0.000398374	1.55022	WNT3A/E2F1/FOXO1/ZFPM2/JAG1/SIRT1/TRIB2/ZFP36L2/WWTR1/IL6/WNT5A/GATA3/AXIN1/TGFB1/INSIG1/SMAD3/ASXL1/ID4/WNT10B/WNT1/TNF/TRIO/RORA/TRIB3/ZFPM1/ANKRD26/ZADH2/ARNTL/DDIT3/RUNX1T1/MSX2/JDP2/ENPP1/ADIPOQ/SORT1/MMP11/GATA2/GPER1	38
GO:0097734	extracellular exosome biogenesis	biological process	19/9065	20/17381	4.25588e-05	0.000560924	0.00040375	1.82151	PDCD6IP/SDC4/HGS/IFNG/SDC1/TSG101/RAB11A/CHMP2A/VPS4A/ATP13A2/RAB7A/COPS5/SNF8/SDCBP/STAM/PRKN/VPS4B/RAB27A/CD34	19
GO:0140112	extracellular vesicle biogenesis	biological process	19/9065	20/17381	4.25588e-05	0.000560924	0.00040375	1.82151	PDCD6IP/SDC4/HGS/IFNG/SDC1/TSG101/RAB11A/CHMP2A/VPS4A/ATP13A2/RAB7A/COPS5/SNF8/SDCBP/STAM/PRKN/VPS4B/RAB27A/CD34	19
GO:1902895	positive regulation of pri-miRNA transcription from RNA polymerase II promoter	biological process	19/9065	20/17381	4.25588e-05	0.000560924	0.00040375	1.82151	JUN/TP53/HIF1A/SPI1/SRF/STAT3/FOS/TERT/TGFB1/BMPR1A/SMARCA4/SMAD3/SMAD1/SMAD6/TEAD1/NGFR/BMP2/PDGFB/RELA	19
GO:0016358	dendrite development	biological process	138/9065	210/17381	4.34778e-05	0.000572141	0.000411823	1.25999	MEF2C/CDC42/PLK2/MEF2A/RAB21/PICALM/NRP1/PREX1/ARF4/RERE/EZH2/MECP2/APP/LRP4/BMP7/ILK/BTBD3/RBFOX2/LRRK2/LPAR1/CDC20/HPRT1/ZNF365/ITPKA/EPHA4/LRP8/STK11/VLDLR/PPP1R9A/PTPRD/YWHAH/HDAC2/RAPGEF2/UBA6/CAPRIN1/PQBP1/SEMA4D/DBN1/VAMP7/IL2/BCL11A/CPEB3/ITGB1/ARF1/MINK1/PAK4/MTOR/TIAM1/DVL1/GSK3A/CUX1/MAP1B/BAIAP2/TRPC5/SLC9A6/ZMYND8/FBXO31/ARID1B/SYNGAP1/TRAK2/CYFIP1/PAK2/PTEN/CFL1/ANKRD27/IQGAP1/TRAK1…	138
GO:0007044	cell-substrate junction assembly	biological process	65/9065	89/17381	4.37953e-05	0.000575419	0.000414183	1.40033	KRT5/BCL2/ROCK1/THBS1/NRP1/ITGB4/CORO1C/SDC4/LAMC2/VEGFA/FN1/PTK2/FERMT2/KDR/TEK/LAMC1/PTPRK/RHOA/LIMS1/ACTN1/DLC1/RCC2/DMTN/ITGA6/PHLDB2/CTTN/THY1/SRC/TLN1/PDPK1/PIP5K1A/TSC1/SMAD3/PTEN/IQGAP1/CD151/TAOK2/SLC9A1/ABL1/CAMSAP3/PPM1F/SFRP1/ITGA5/RAC1/ROCK2/PTPRJ/ITGA2/MMP14/FMN1/GREM1/LDB1/CLASP1/TESK2/LAMA5/EFNA5/TNS1/GPM6B/WNT4/WHAMM/WDPCP/ITGB3/ACVRL1/PTK2B/PLEC/BCAS3	65
GO:0001844	protein insertion into mitochondrial membrane involved in apoptotic signaling pathway	biological process	27/9065	31/17381	4.44918e-05	0.000583661	0.000420115	1.66997	E2F1/BCL2/YWHAQ/TP53/BCL2L11/TP73/YWHAZ/PMAIP1/MAPK8/BAX/DYNLL2/YWHAH/SFN/NMT1/PPP3R1/PPP1R13B/YWHAE/YWHAB/TFDP1/YWHAG/TFDP2/BMF/DYNLL1/MOAP1/BID/TP63/CASP8	27
GO:0006406	mRNA export from nucleus	biological process	78/9065	110/17381	4.4822e-05	0.000585258	0.000421265	1.35959	POM121/SRSF11/CPSF1/SRSF9/SRSF1/SRSF7/DDX39A/NDC1/POLR2D/NUP58/RBM8A/HHEX/WDR33/GLE1/SRSF2/SRSF3/NUP62/SRSF6/SRRM1/SYMPK/CPSF3/SLBP/SRSF4/ZC3H11A/NUP50/POM121C/EIF4E/NUP160/NUP210/SRSF5/NUP153/U2AF2/RNPS1/SMG5/NCBP2/RANBP2/SMG1/PABPN1/NUP214/CASC3/AAAS/NUP37/IWS1/CHTOP/EIF4A3/NXT1/POLDIP3/SMG6/AKAP8L/TPR/CPSF2/NUPL2/THOC5/THOC1/HNRNPA2B1/NUP98/NUP43/SETD2/ALKBH5/AGFG1/DDX39B/EIF5A/SMG7/NUP205/UPF…	78
GO:0060071	Wnt signaling pathway, planar cell polarity pathway	biological process	78/9065	110/17381	4.4822e-05	0.000585258	0.000421265	1.35959	CDC42/WNT9B/DVL2/GPC4/PFN1/RHOA/PSMD9/WNT5A/AP2S1/DKK1/CLTC/PSME1/UBA52/PSMD3/UBB/AP2B1/PSMB2/AP2A2/TIAM1/DVL1/PSMD4/PSMD11/PSMC1/PSMB3/PSMA7/PSMC5/PTK7/SMURF1/AP2A1/PSMD2/UBC/PSMD6/PSMC4/PSMD1/PSME3/PSMD7/ABL1/VANGL1/PSMA2/PSMD8/PSMD13/PSMC3/MED12/SFRP1/WNT1/RAC1/FZD4/VANGL2/ZNRF3/FZD6/PRICKLE1/CELSR3/FZD7/PSMA5/FZD5/NPHP3/SMURF2/PSMA1/RPS27A/PSMF1/ARRB2/AP2M1/PRICKLE2/PSMB9/MLLT3/NKD1/DVL3/GPC6…	78
GO:0071427	mRNA-containing ribonucleoprotein complex export from nucleus	biological process	78/9065	110/17381	4.4822e-05	0.000585258	0.000421265	1.35959	POM121/SRSF11/CPSF1/SRSF9/SRSF1/SRSF7/DDX39A/NDC1/POLR2D/NUP58/RBM8A/HHEX/WDR33/GLE1/SRSF2/SRSF3/NUP62/SRSF6/SRRM1/SYMPK/CPSF3/SLBP/SRSF4/ZC3H11A/NUP50/POM121C/EIF4E/NUP160/NUP210/SRSF5/NUP153/U2AF2/RNPS1/SMG5/NCBP2/RANBP2/SMG1/PABPN1/NUP214/CASC3/AAAS/NUP37/IWS1/CHTOP/EIF4A3/NXT1/POLDIP3/SMG6/AKAP8L/TPR/CPSF2/NUPL2/THOC5/THOC1/HNRNPA2B1/NUP98/NUP43/SETD2/ALKBH5/AGFG1/DDX39B/EIF5A/SMG7/NUP205/UPF…	78
GO:0046916	cellular transition metal ion homeostasis	biological process	73/9065	102/17381	4.74081e-05	0.000617446	0.000444434	1.37224	S100A9/SOD1/CAND1/AP3D1/APP/HMOX1/HIF1A/SMAD4/ERFE/PRNP/SLC30A7/FBXL5/SLC39A10/FTL/SLC39A14/ABCB6/ABCB7/ATP6V1A/SRI/CCDC22/SLC30A6/ARF1/MYC/UBA52/UBB/ATP6AP1/SKP1/ATP13A2/SCO1/SLC30A1/UBC/SLC39A8/SLC30A9/NCOA4/HMOX2/NDFIP1/SLC40A1/HFE/IREB2/NUBP1/ATP6V1G1/TFRC/ATP7A/MT2A/SLC39A7/SLC31A1/ATOX1/ABCG2/CCDC115/FXN/ATP6V0A2/SLC11A2/RPS27A/SLC11A1/FLVCR1/SLC46A1/ATP6V0D1/SLC30A5/SLC30A4/EGLN1/SLC39A6/A…	73
GO:0018022	peptidyl-lysine methylation	biological process	81/9065	115/17381	4.74338e-05	0.000617446	0.000444434	1.3505	DNMT1/MYB/DNMT3B/PWP1/EHMT2/EHMT1/ASH2L/BRCA1/EZH2/MECP2/SMAD4/SIRT1/PRDM16/KMT5A/RBBP5/NSD2/HIST1H1D/PHF19/VCPKMT/SETD1B/KMT5B/ARID4B/KMT2D/SMYD2/EZH1/JARID2/HIST1H1B/DPY30/SMARCB1/GATA3/WDR82/KMT2A/SETD1A/CHD5/HIST1H1E/CTNNB1/NELFE/SMYD1/ATRX/RIF1/ASH1L/BCOR/KDM3A/IWS1/CXXC1/HIST1H1C/SETDB1/SUV39H1/BEND3/KMT2C/METTL21A/NSD1/SETD7/RLF/NSD3/SETD2/SUZ12/TET3/OGT/IRF4/DOT1L/KDM6A/MEN1/SETD3/PAX5/ME…	81
GO:0006405	RNA export from nucleus	biological process	98/9065	143/17381	4.77032e-05	0.000619994	0.000446268	1.314	POM121/SRSF11/CPSF1/SRSF9/SRSF1/SRSF7/DDX39A/NDC1/POLR2D/XPO1/NUP58/NMD3/RBM8A/HHEX/WDR33/GLE1/SRSF2/RAN/SRSF3/NUP62/SRSF6/SRRM1/SYMPK/CPSF3/SLBP/SRSF4/ZC3H11A/NUP50/NOP53/POM121C/EIF4E/NUP160/NUP210/XPOT/SRSF5/HNRNPA1/NUP153/RANBP3/U2AF2/RNPS1/SMG5/NCBP2/RANBP2/NPM1/SMG1/XPO5/PABPN1/NUP214/CASC3/AAAS/TSC1/NUP37/IWS1/NOL6/CHTOP/EIF4A3/NXT1/POLDIP3/SMG6/AKAP8L/TPR/CPSF2/NUPL2/THOC5/THOC1/HNRNPA2B1…	98
GO:0016575	histone deacetylation	biological process	63/9065	86/17381	4.90248e-05	0.000636189	0.000457925	1.40459	HDAC4/VEGFA/RCOR1/PRKD2/MTA2/TP53/SIRT1/HDAC1/LRRK2/MAPK8/RBBP7/NIPBL/CHD4/NACC2/ARID4B/SIN3A/HDAC2/CTBP1/MIER1/SMARCAD1/SKI/SREBF1/SALL1/TGFB1/MSL3/SFPQ/AKAP8/RBM14/SAP18/AKAP8L/TADA3/SIN3B/SUDS3/BRMS1L/BCL6/MTA1/KDM5A/ELK4/REST/HDAC7/MORF4L2/TBL1XR1/BAZ2A/HDAC5/PER1/PRDM5/MORF4L1/SDR16C5/HDAC9/TBL1X/MTA3/SAP30/MBD3/C6orf89/ATXN3L/RBBP4/PER2/JDP2/BRMS1/SIRT3/HDAC8/PHF21A/CHD3	63
GO:0070373	negative regulation of ERK1 and ERK2 cascade	biological process	49/9065	64/17381	5.01053e-05	0.000649211	0.000467298	1.46799	TIMP3/KLF4/CSK/LIF/SMAD4/ERRFI1/TLR4/PTPRR/GSTP1/SPRY2/PTPN1/DUSP3/EIF3A/PTEN/RAPGEF1/TNIP1/SPRY1/ATF3/ABL1/EZR/ARRB1/SYNJ2BP/RANBP9/FBLN1/DUSP1/DAB2IP/CAMK2N1/PIN1/LYN/DUSP26/CNKSR3/DUSP4/NLRP6/SPRY4/EPHB2/WNK2/FLCN/DUSP6/DUSP10/NLRP12/ADIPOQ/SIRT3/DLG1/NDRG2/SLC9A3R1/C3orf33/PTPN2/RPS6KA6/GPER1	49
GO:0021766	hippocampus development	biological process	56/9065	75/17381	5.2024e-05	0.000673036	0.000484447	1.43164	DRD1/WNT3A/ZEB2/CDK6/EZH2/SRF/DLX1/LEF1/NF2/UQCRQ/LRP8/PAPD4/EZH1/KDM6B/BCAN/KIF5B/ATP2B4/UBA6/NR4A3/XRN2/EIF2B5/PHLPP2/YWHAE/XRCC1/MDK/TSC1/PTEN/DLX2/ID4/SMO/CASP3/GSK3B/BTG2/PAFAH1B1/CDK5R1/GLI3/PTPRS/BBS4/RARA/KIF14/DCLK2/MKKS/SRD5A1/NR2E1/EMX2/LMX1A/ATAT1/NKX2-1/PLXNA3/MFSD2A/PROX1/LHX5/BBS2/NCOA1/OGDH/NEUROD1	56
GO:0005996	monosaccharide metabolic process	biological process	175/9065	274/17381	5.22658e-05	0.000675127	0.000485952	1.2246	AKT2/SLC45A3/TPI1/OMA1/FOXO1/SLC25A1/GPD2/ADPGK/PKM/IGF1/PGM2/SERP1/G6PD/INPPL1/PRKCE/GALT/IRS1/CPT1A/PPARA/IGF2/HK2/SIRT1/IGFBP5/PMAIP1/AKT1/HMGB1/PHLDA2/SESN2/C1QTNF2/IL6/MIDN/PRKAA1/PGD/KAT2A/RGN/SLC25A10/B4GALT1/GSTO1/TKT/SRC/POFUT1/SLC23A2/EPM2AIP1/GPI/DCXR/MTOR/MAN2C1/CYB5R3/SLC35B4/GSK3A/ENO1/PFKP/GALM/NISCH/MAEA/AKR1B1/GAPDH/BRAT1/PDHA1/RANBP2/PPARGC1A/PPP1CB/PGAM1/USF1/SOGA1/ALDOA/PFKFB4…	175
GO:0045070	positive regulation of viral genome replication	biological process	29/9065	34/17381	5.26901e-05	0.000679565	0.000489147	1.63541	HACD3/PPIB/ADAR/NOTCH1/VAPA/DDX3X/DDB1/TOP2A/ADARB1/IFIT1/NR5A2/PDE12/PPIA/LARP1/PABPC1/RAD23A/HSPA8/NUCKS1/PPIE/VAPB/SRPK1/TARBP2/CCL5/STOM/STAU1/SRPK2/PKN2/CD28/TBC1D20	29
GO:0046165	alcohol biosynthetic process	biological process	90/9065	130/17381	5.29309e-05	0.000681627	0.000490631	1.32741	SOD1/GCH1/G6PD/FGF2/ISYNA1/CES1/NFKB1/NFYB/IFNG/CFTR/DHFRP1/NSDHL/IDI1/TM7SF2/EPHX1/HMGCR/PRKAA1/LBR/RAN/HMGCS1/NFYA/SP1/ACLY/FDFT1/SREBF1/CYB5R3/KPNB1/FASN/SCD/AKR1B1/PARK7/ACACA/INSIG1/MBTPS1/EBP/PCBD1/SREBF2/IMPA1/CNBP/ACAA2/SPTLC1/GGPS1/PRKAA2/ERLIN1/LSS/NUS1/DHCR7/APOE/TNF/SC5D/MSMO1/SQLE/ACER2/IPPK/PPIP5K2/PLPP6/GBA/ERG28/CYP51A1/INSIG2/GPAM/ELOVL6/GOT1/DHCR24/PLCG2/ACER3/PTAFR/SPTLC2/PLEK/…	90
GO:0030335	positive regulation of cell migration	biological process	271/9065	442/17381	5.33372e-05	0.00068581	0.000493642	1.17558	DRD1/NTRK3/MET/ACVR1/AKT2/FADD/HDAC4/BCL2/JUN/PAK1/SOD2/FOXP1/RHOB/THBS1/NRP1/EGFR/CYR61/IGF1/TMSB4X/EPB41L4B/SHTN1/PREX1/LAMC2/CRK/TAC1/FGFR1/VEGFA/PRKCE/ETS1/APP/FN1/FGF2/PTK2/PRKD2/IL1R1/COL1A1/CXCL8/PLAU/IGF1R/CSF1/EDN1/HRAS/BMP7/HIF1A/FGF7/SOX9/MAPK3/PDGFRA/SERPINE1/MAPK1/FLT1/KDR/ILK/PTGS2/PODXL/SLC8A1/TGFBR2/TEK/IFNG/NOTCH1/MAPRE1/NTF3/CPNE3/BMPR2/AKT1/PFN1/SNAI2/MDM2/ADAM9/PDPN/LPAR1/RHOA…	271
GO:0006476	protein deacetylation	biological process	71/9065	99/17381	5.36928e-05	0.000688581	0.000495636	1.37509	SPRED1/HDAC4/VEGFA/EP300/RCOR1/PRKD2/MTA2/TP53/SIRT1/HDAC1/IFNG/LRRK2/MAPK8/RBBP7/NIPBL/CHD4/NACC2/ARID4B/SPRED2/SIN3A/HDAC2/CTBP1/MIER1/DYRK1A/SMARCAD1/CCAR2/SKI/SREBF1/SALL1/TGFB1/MSL3/SFPQ/AKAP8/RBM14/SAP18/AKAP8L/TADA3/SIN3B/SUDS3/BRMS1L/BCL6/MTA1/KDM5A/ELK4/REST/SIRT4/HDAC7/MORF4L2/TBL1XR1/BAZ2A/HDAC5/PER1/PRDM5/MORF4L1/FRY/SDR16C5/HDAC9/TBL1X/MTA3/SAP30/MBD3/C6orf89/ATXN3L/RBBP4/PER2/JDP2/B…	71
GO:0045685	regulation of glial cell differentiation	biological process	47/9065	61/17381	5.37162e-05	0.000688581	0.000495636	1.47732	CXCR4/NTRK3/HES1/TLR2/SLC45A3/F2/APP/LIF/PRMT5/NF1/DICER1/PPARG/TP73/NOTCH1/LDLR/DLX1/TNFRSF21/ZNF365/CDK1/MYCN/EPHA4/HDAC2/RHEB/MTOR/CTNNB1/TENM4/PRPF19/DLX2/ID4/SERPINE2/NKX6-1/IL6ST/NOG/LIN28A/ASPA/WDR1/NKX2-2/BMP2/NKX6-2/MAG/NR2E1/SHH/ZNF488/RELA/DUSP10/MBD1/GPR37L1	47
GO:0090596	sensory organ morphogenesis	biological process	161/9065	250/17381	5.4296e-05	0.000694956	0.000500225	1.23479	WNT3A/BCL2/SOD1/MAFB/RARG/ARID1A/ZEB1/PITX3/FGFR1/VEGFA/HMGN1/HPN/DVL2/EDN1/JAG1/NF1/BMP7/HIF1A/SOX9/MAPK3/SP3/HDAC1/MAPK1/NTRK2/SCRIB/FGF9/PAX6/STAT3/FOXF2/NIPBL/BAX/EPHA2/SIX1/SIX4/WNT5A/FRS2/FBN1/SPRY2/FGFR2/C12orf57/HDAC2/MYO3B/MFN2/GLI2/GNAT2/GATA3/KDM2B/FOXN4/THY1/NR4A3/TSPAN12/AXIN1/HIPK2/SKI/FRZB/SALL1/TBX1/DVL1/BCR/COL5A1/CTNNB1/FBN2/TBX2/FJX1/ABR/INSIG1/PTK7/YY1/SEC24B/TENM3/TSKU/HIPK1/…	161
GO:0006900	vesicle budding from membrane	biological process	66/9065	91/17381	5.51398e-05	0.000703618	0.00050646	1.39062	GOLPH3L/SEC23IP/CTSC/AP3D1/ANXA2/TRAPPC3/USO1/P2RX7/VAPA/SEC31A/GBF1/TMED2/SEC23A/RAB1B/PPP6R3/TRAPPC10/GOLPH3/MYO18A/FOLR1/SEC16A/ARF1/PEF1/BET1/VPS4A/MCFD2/NSF/INSIG1/TFG/TMED9/RAB7A/VAPB/KLHL12/SEC24B/SCFD1/TRAPPC1/TRAPPC9/SAR1B/PREB/SEC24A/ANKRD28/LMAN1/FNBP1L/CNIH1/SAR1A/TMED10/GOLGA2/TRAPPC6B/TGFA/CUL3/WASL/PPP6R1/RAB1A/CD59/PRKN/SNX3/MIA3/PPP6C/TRAPPC2/GOSR2/TRAPPC4/TRAPPC2L/SEC24D/TBC1D20…	66
GO:1903578	regulation of ATP metabolic process	biological process	66/9065	91/17381	5.51398e-05	0.000703618	0.00050646	1.39062	HDAC4/IGF1/TMSB4X/POM121/P2RX7/PPARA/HIF1A/STAT3/NDC1/NUP58/CDK1/PRKAA1/NUP62/NUP50/PDE12/POM121C/PRKAG1/NUP160/NUP210/CCNB1/NUP153/ENO1/RANBP2/PPARGC1A/PGAM1/PFKFB4/PARK7/PARP1/TIGAR/NUP214/AAAS/NUP37/SLC25A33/ATPIF1/TPR/NUPL2/PRKAA2/VCP/NUP98/NUP43/DDIT4/PPIF/OGT/ATP7A/PFKFB2/INS/NUP205/NUP155/SEH1L/NUP54/INSR/EIF6/NUP93/FLCN/ESRRB/ENTPD5/NUP188/DNAJC15/MLXIPL/TAZ/NUP85/CBFA2T3/NUP35/GCK/SLC25A…	66
GO:0030520	intracellular estrogen receptor signaling pathway	biological process	45/9065	58/17381	5.71411e-05	0.000724827	0.000521726	1.48762	ESR1/PAK1/ARID1A/BRCA1/DDX5/MED1/EGLN2/RBFOX2/KANK2/KMT2D/CBFB/SRC/AXIN1/NCOA6/WBP2/DDX54/PAGR1/CNOT1/DDX17/RBM14/CNOT9/PARP1/PHB2/PPARGC1B/TADA3/AR/YAP1/CARM1/UFL1/GPAM/UBA5/PADI2/CNOT2/ZNF366/FOXH1/RUNX1/CYP7B1/TAF7/UFM1/STRN3/LATS1/TP63/ESR2/KCTD6/FOXA1	45
GO:0051865	protein autoubiquitination	biological process	45/9065	58/17381	5.71411e-05	0.000724827	0.000521726	1.48762	TRAF6/UHRF1/BRCA1/RNF213/LRRK2/MDM2/CNOT4/RNF41/UBE2A/RNF10/RNF181/RNF115/ITCH/TRIM37/RAG1/AMFR/MTA1/RNF11/UBE2D2/RNF4/RNF146/RNF185/TRIM71/KLHL24/UBE2D3/TRIM13/RNF13/ASB4/DTX3L/UBE4B/UBE2B/RNF141/WWP2/TRAF2/PRKN/ERCC8/RAD18/TRIM21/SASH1/RNF8/TAF1/RNF187/TRIM17/LRSAM1/BFAR	45
GO:0002070	epithelial cell maturation	biological process	15/9065	15/17381	5.71461e-05	0.000724827	0.000521726	1.91737	CDKN1A/HOXA5/HIF1A/TYMS/PGR/GPAT4/XBP1/RFX3/FEM1B/NKX6-1/SIX3/HOXB13/TMEM79/TFCP2L1/FOXA1	15
GO:0032075	positive regulation of nuclease activity	biological process	15/9065	15/17381	5.71461e-05	0.000724827	0.000521726	1.91737	HSPA1A/AKT1/BAX/PARP16/PCNA/PTPN1/DDX11/RPS3/VAPB/HSPA5/ERN1/PRKCD/DAB2IP/BAK1/HMGB2	15
GO:0051817	modification of morphology or physiology of other organism involved in symbiotic interaction	biological process	74/9065	104/17381	5.7929e-05	0.000733651	0.000528078	1.36429	NTRK3/JUN/PPIB/F2/ANXA2/EP300/HMGA2/TUSC2/HPN/HDAC1/BCL2L11/SCRIB/VAPA/LEF1/KPNA2/TYMS/TARDBP/F2RL1/SMARCB1/ARG1/KPNA5/SMC3/ITGAV/SP1/ATG7/HIPK2/KPNB1/TGFB1/RRP1B/HSPA8/SMARCA4/GAPDH/CHD1/SLC25A6/PABPN1/NUCKS1/CTDP1/SMAD3/CFL1/TNIP1/VAPB/KPNA1/PSMC3/BCL2L1/APOE/RXRA/CCNK/FMR1/REST/CCL5/CCL3/TAF11/STOM/ZNF639/CD4/CCNT1/SUGT1/INSR/PRKN/RAB9A/KPNA4/MBL2/ZNF502/KPNA3/TFAP4/POU2F3/TREM1/LTF/CAV2/CD209…	74
GO:0042306	regulation of protein import into nucleus	biological process	115/9065	172/17381	6.05413e-05	0.000765583	0.000551062	1.28197	WNT3A/TLR2/CDKN1A/PPM1A/F2/EGFR/IGF1/TMSB4X/SUFU/MED1/FAF1/MAPK7/PIK3R2/APP/CYLD/NF1/ERBB4/BMP7/SMAD4/SIRT1/MAPK1/TLR4/NFKBIA/PTGS2/IFNG/LRRK2/SNAI2/RHOA/TGFBR1/NUP58/ECT2/HSP90AB1/CDK1/NLRP3/CDH1/SULF2/WWTR1/IL6/NUP62/JUP/G3BP2/EMD/FLNA/SRI/CCDC22/UBR5/BAMBI/MTOR/TRIM28/TGFB1/BMPR1A/PARP10/KEAP1/PARP1/NUTF2/MBTPS1/SMAD3/PKIG/SMO/DMAP1/TPR/MAVS/DYRK2/IPO5/OGG1/GSK3B/AXIN2/NODAL/IL18/TNF/RAB23/LIT…	115
GO:0051225	spindle assembly	biological process	69/9065	96/17381	6.07558e-05	0.000767145	0.000552186	1.37811	CDC14A/KIF23/CDC14B/CEP63/HSPA1A/CCSAP/KIF2A/HNRNPU/RHOA/RACGAP1/KIF11/CDC20/ASPM/FBXO5/RCC1/HAUS8/RAB11A/FLNA/KIF4A/ZNF207/CHMP2A/SMC3/TUBB/TNKS/HSPA1B/KPNB1/SMC1A/DYNC1H1/PLK1/RPS3/TUBGCP6/STAG2/TPX2/TPR/AURKA/CEP192/NEK7/AURKB/HAUS6/BIRC5/KIF3B/RNF4/CHMP2B/CHMP4B/CHEK2/GOLGA2/STAG1/MLH1/CEP97/MZT1/CLASP1/HAUS3/TUBGCP4/KIFC1/MAP10/VPS4B/INO80/CHMP1B/TUBGCP5/ABRAXAS2/HAUS5/HAUS2/GPSM2/WASHC5/NUM…	69
GO:0032436	positive regulation of proteasomal ubiquitin-dependent protein catabolic process	biological process	59/9065	80/17381	6.10593e-05	0.000769822	0.000554113	1.41406	PLK2/CEBPA/HSPA1A/RNF138/ANKIB1/PIAS1/TRIB2/AKT1/LRRK2/MDM2/SOCS4/CSNK1A1/NOP53/CAV1/RACK1/DVL1/RAD23A/USP5/PLK1/KEAP1/UBQLN2/UBQLN1/ARIH2/AURKA/SUMO2/FBXO22/VCP/GSK3B/ARIH1/LONRF2/CSNK1E/LONRF1/PRICKLE1/SOCS5/TRIB3/SMAD7/GBA/SUMO1/RNF217/RNF144B/HERPUD1/NKD2/LONRF3/PRKN/RNF19B/RNF125/TRIB1/DAB2/RNF14/KLHL40/UBE2V2/TAF1/CBFA2T3/RNF166/RFWD2/CLU/CSNK1D/BCAP31/SGTA	59
GO:0071478	cellular response to radiation	biological process	112/9065	167/17381	6.15886e-05	0.000775335	0.000558082	1.2859	CDC25A/CCND2/TP53INP1/AKT2/CDKN1A/CHEK1/RHOB/GRB2/CASP9/ATM/EP300/HMGA2/RAD51/CREBBP/CLOCK/HRAS/TP53/SIRT1/N4BP1/PTGS2/TP73/MGMT/PTPRK/DNM2/SNAI2/MDM2/NIPBL/BAX/GADD45A/ECT2/DDB1/POLD1/PCNA/BLM/CRY2/TNKS1BP1/PAPD4/STK11/TMEM109/ELK1/CUL4B/MME/GNB1/NOC2L/GATA3/CALM1/RAD9A/MYC/NMT1/TGFB1/NPM1/NUCKS1/XRCC6/RPL26/RUVBL2/YY1/XRCC5/ATF4/EEF1D/AURKB/BCL2L1/SFRP1/HSPA5/USP28/YAP1/EIF2S1/FMR1/PIK3R1/TP53B…	112
GO:0045773	positive regulation of axon extension	biological process	33/9065	40/17381	6.27817e-05	0.000785653	0.000565508	1.58183	NTRK3/PAK1/NRP1/SHTN1/VEGFA/FN1/TWF2/SRF/ILK/BMPR2/CXCL12/NDEL1/RAB11A/CDH4/L1CAM/MAP1B/TRPC5/CYFIP1/ZFYVE27/MEGF8/GOLGA4/PAFAH1B1/GDI1/SEMA7A/LIMK1/MAPT/SEMA5A/DISC1/NTN1/TRPV2/ISLR2/TNFRSF12A/NRG1	33
GO:0061647	histone H3-K9 modification	biological process	33/9065	40/17381	6.27817e-05	0.000785653	0.000565508	1.58183	DNMT1/MYB/CHEK1/DNMT3B/EHMT2/EHMT1/BRCA1/MECP2/SMAD4/SIRT1/ARID4B/JARID2/HIST1H1B/SMARCB1/GATA3/KMT2A/ATRX/RIF1/KDM3A/SUV39H1/BEND3/SETD7/CRTC2/KAT2B/ZNF451/PAX5/PRDM5/SUV39H2/PIWIL2/ZNF274/SETDB2/PRDM12/HDAC8	33
GO:0098760	response to interleukin-7	biological process	33/9065	40/17381	6.27817e-05	0.000785653	0.000565508	1.58183	HIST1H3B/PIK3R2/IRS1/STAT3/BRWD1/HIST2H3A/HIST2H3D/HIST2H3C/HIST1H3D/SMARCA4/HIST1H3H/STAT5B/CISH/PIK3CA/PIK3R1/HIST1H3C/HIST1H3J/HIST1H3F/FYN/STAT5A/IL7/HIST1H3G/SOCS1/PIK3C3/ELOC/HIST1H3E/HIST1H3A/JAK3/IRS2/PTK2B/IL7R/SOCS2/PIK3CB	33
GO:0098761	cellular response to interleukin-7	biological process	33/9065	40/17381	6.27817e-05	0.000785653	0.000565508	1.58183	HIST1H3B/PIK3R2/IRS1/STAT3/BRWD1/HIST2H3A/HIST2H3D/HIST2H3C/HIST1H3D/SMARCA4/HIST1H3H/STAT5B/CISH/PIK3CA/PIK3R1/HIST1H3C/HIST1H3J/HIST1H3F/FYN/STAT5A/IL7/HIST1H3G/SOCS1/PIK3C3/ELOC/HIST1H3E/HIST1H3A/JAK3/IRS2/PTK2B/IL7R/SOCS2/PIK3CB	33
GO:0000910	cytokinesis	biological process	94/9065	137/17381	6.28746e-05	0.000785653	0.000565508	1.31557	STMN1/CDC42/KIF23/ANLN/PDCD6IP/RHOB/BRCA2/PRKCE/UVRAG/RHOA/CCP110/RACGAP1/ECT2/CDC6/SNX9/ESPL1/SPIRE1/SON/KLHL21/SEPT7/NUP62/RAB11A/SEPT6/KIF4A/RHOC/IST1/CDC25B/BIN3/ARF1/RAB35/PRPF40A/VPS4A/E2F8/PLK1/MYH10/CIT/SNX18/ALKBH4/SPTBN1/MYH9/CFL1/ANXA11/PDXP/AURKA/APC/AHCTF1/MYO19/DIAPH2/AURKB/JTB/CENPV/BCL2L1/PRC1/SETD2/ROCK2/CEP55/ACTR2/STAMBP/INCENP/KIF3B/CENPA/SH3GLB1/CHMP4B/BECN1/PIN1/BBS4/CUL3/KI…	94
GO:0048634	regulation of muscle organ development	biological process	100/9065	147/17381	6.36033e-05	0.00079358	0.000571214	1.30434	MEF2C/GATA6/WNT3A/HDAC4/BCL2/PAK1/FGF20/IGF1/GJA1/DDX5/G6PD/SOX6/FGFR1/ERBB3/FGF2/PIM1/ZFPM2/TSC22D3/EDN1/ERBB4/SMAD4/CREB1/FGF9/TGFBR2/TP73/NOTCH1/TGFBR1/LEF1/TGFBR3/CDK1/SIX1/HMGCR/IL6/SIX4/PRKAA1/JARID2/FRS2/FGFR2/DKK1/CENPF/GPC1/MYOCD/CCNB1/MTOR/TBX1/NR1D2/DDX17/GSK3A/CTNNB1/TGFB1/TBX2/BMPR1A/MTPN/CTDP1/YBX3/SMAD3/PTEN/EFNB2/USP19/FBXO22/FLOT1/WNT10B/GLI1/RPS6KB1/DDX39B/RBPJ/NOG/PIN1/WNT2/FZD…	100
GO:0032608	interferon-beta production	biological process	39/9065	49/17381	6.46033e-05	0.000803677	0.000578482	1.52607	TLR2/TLR4/TBK1/DDX3X/HMGB1/IRF7/NMI/RIPK2/RNF216/TICAM1/IFIH1/YY1/NLRX1/CACTIN/MAVS/FLOT1/IFNAR1/RIOK3/DDX58/POLR3G/TLR7/TLR3/PTPRS/ZBTB20/REL/TRAF3/TRIM56/PYCARD/TRAF3IP1/POLR3A/HMGB2/PPM1B/IRF1/RNF135/POLR3F/POLR3D/NLRC3/TIRAP/LILRB1	39
GO:0061383	trabecula morphogenesis	biological process	39/9065	49/17381	6.46033e-05	0.000803677	0.000578482	1.52607	MED1/COL1A1/BMP7/SRF/TEK/NOTCH1/RHOA/TGFBR1/TGFBR3/HEG1/SEMA4D/FBN2/BMPR1A/PPARGC1B/SFRP1/WNT10B/SLC40A1/RBPJ/CHD7/FKBP1A/NOG/S1PR1/GREM1/HEY2/UBE4B/FHL2/ENG/NKX2-5/FOXH1/EGLN1/BMP10/MSX2/TGFB2/SOS1/MMP2/DLL4/HEY1/NRG1/PLXNB1	39
GO:0045089	positive regulation of innate immune response	biological process	217/9065	348/17381	6.76974e-05	0.000840926	0.000605293	1.1956	S100A9/IRAK2/KRAS/TLR2/FADD/ESR1/TRAF6/IRAK1/HSPA1A/PAK1/WDFY1/UNC93B1/MED1/EP300/PRKCE/IKBKB/HSP90B1/CADM1/HSPD1/CYLD/NFKB1/RPS6KA5/CREBBP/MATR3/CHUK/HRAS/MUC4/TLR4/IKBKE/XIAP/NFKBIA/TBK1/HMGB1/S100A14/BTRC/PSMD9/ERBIN/AP1G1/WNT5A/IRF7/ITGB2/RSAD2/SIN3A/F2RL1/NOP53/AIM2/PTPN22/DDX60/PSME1/ANKRD17/PQBP1/RIPK2/SRC/LGR4/CAV1/SEC14L1/LSM14A/UBA52/PSMD3/UBB/PSMB2/PDPK1/PRKACA/NONO/HSPA1B/UBE2N/PSMD4/…	217
GO:0043902	positive regulation of multi-organism process	biological process	116/9065	174/17381	6.82564e-05	0.000843227	0.00060695	1.27825	CDK9/TRAF6/JUN/HACD3/PPIB/POLR2K/NELFCD/ADAR/EP300/HPN/MAPK3/BCL2L11/IFNG/NOTCH1/TBK1/PFN1/POLR2D/VAPA/DDX3X/LEF1/DDB1/TOP2A/RSF1/ADARB1/TSG101/IFIT1/LGALS1/F2RL1/OXTR/NR5A2/PDE12/SMARCB1/POLR2I/DDX60/PPIA/CHMP2A/ANKRD17/ARG1/RIPK2/SMC3/SP1/LARP1/POLR2A/POLR2L/MIF/PABPC1/NELFE/RRP1B/VPS4A/POLR2B/RAD23A/HSPA8/SMARCA4/GAPDH/CHD1/SUPT5H/NUCKS1/POLR2C/CTDP1/PRKCA/CFL1/PUM1/PPIE/RAB7A/VAPB/VPS37B/C1QB…	116
GO:0072524	pyridine-containing compound metabolic process	biological process	116/9065	174/17381	6.82564e-05	0.000843227	0.00060695	1.27825	HDAC4/TPI1/GPD2/ADPGK/PKM/IGF1/POM121/PGM2/G6PD/PNP/P2RX7/PPARA/HIF1A/HK2/PTGS2/STAT3/NDC1/TP53I3/NUP58/PARP16/PDXK/PRKAA1/NUP62/PGD/NUP50/POM121C/PRKAG1/PSAT1/NUP160/NUP210/NT5E/TKT/LDHA/GPI/DCXR/NUP153/ENO1/PFKP/GAPDH/OGDHL/PDHA1/RANBP2/PPARGC1A/PARP10/PGAM1/ALDOA/PFKFB4/PDHX/TIGAR/MDH2/NUP214/AAAS/NUP37/MPC1/PDXP/BPGM/TALDO1/TPR/NUPL2/MDH1/PRKAA2/HK1/LDHB/VCP/NUP98/IDH2/NUP43/PDHB/RPE/CD38/DDI…	116
GO:0043087	regulation of GTPase activity	biological process	289/9065	475/17381	6.84156e-05	0.000843227	0.00060695	1.16657	NTRK3/AKT2/JUN/RGS3/SOD1/HACD3/PICALM/NRP1/IQGAP3/CORO1C/AGRN/PREX1/RABGAP1L/CRK/ARHGAP29/EZH2/PIK3R2/PTK2/ARHGDIA/DVL2/NF1/HRAS/ERBB2/NTRK2/SCRIB/ERRFI1/RAP1A/NTF3/LRRK2/LIMS1/VAV3/RACGAP1/PLXNC1/ECT2/EPHA2/CDC42EP4/TBC1D1/TMED2/ARHGAP11A/SNX9/ARHGAP19/BNIP2/GNB5/EPHA4/ARHGAP12/NDEL1/TRIP10/ARHGAP1/RIN2/WNT5A/DEPDC1/DLC1/RGS13/SPRY2/RCC2/ITGA6/F2RL1/CCL14/RGN/RAPGEF2/ELMOD2/SRGAP1/SEMA4D/TBC1D9/…	289
GO:0048708	astrocyte differentiation	biological process	50/9065	66/17381	6.84834e-05	0.000843227	0.00060695	1.45256	DRD1/NTRK3/HES1/KRAS/CDK6/LRP1/F2/EGFR/SOX6/MAP2K1/APP/LIF/NF1/SOX9/MAPK3/MAPK1/TLR4/NOTCH1/PAX6/STAT3/LDLR/MYCN/EPHA4/EIF2B5/PTPN11/PRPF19/ID4/SMO/ABL1/SERPINE2/TAL1/IL6ST/NOG/MAPT/NKX2-2/BMP2/MAG/TSPAN2/CNTF/NR2E1/PLP1/VIM/SHH/POU3F2/MBD1/DLL1/S100B/GCM1/GPR37L1/LAMC3	50
GO:1902108	regulation of mitochondrial membrane permeability involved in apoptotic process	biological process	50/9065	66/17381	6.84834e-05	0.000843227	0.00060695	1.45256	E2F1/BCL2/HSPA1A/RHOT1/YWHAQ/TP53/BCL2L11/TP73/YWHAZ/PMAIP1/MAPK8/BAX/DYNLL2/YWHAH/SFN/TMEM14A/RHOT2/NMT1/GSK3A/PPP3R1/PPP1R13B/YWHAE/SLC25A5/RTL10/ATPIF1/BOK/YWHAB/ACAA2/ATF2/GSK3B/TFDP1/YWHAG/TFDP2/SLC35F6/BMF/HIP1R/CAMK2A/MUL1/BLOC1S2/DYNLL1/BAK1/FZD9/MOAP1/MTRNR2L5/STPG1/BID/TP63/MPV17L/CASP8/NAIF1	50
GO:1905710	positive regulation of membrane permeability	biological process	50/9065	66/17381	6.84834e-05	0.000843227	0.00060695	1.45256	E2F1/BCL2/HSPA1A/RHOT1/YWHAQ/TP53/BCL2L11/TP73/YWHAZ/PMAIP1/MAPK8/BAX/DYNLL2/YWHAH/SFN/TMEM14A/RHOT2/NMT1/GSK3A/PPP3R1/PPP1R13B/YWHAE/SLC25A5/RTL10/ATPIF1/SLC9A1/BOK/YWHAB/ACAA2/ATF2/GSK3B/PPIF/TFDP1/YWHAG/TFDP2/SLC35F6/BMF/HIP1R/MUL1/BLOC1S2/DYNLL1/BAK1/FZD9/MOAP1/HEBP2/STPG1/BID/TP63/MPV17L/CASP8	50
GO:0045995	regulation of embryonic development	biological process	86/9065	124/17381	6.94985e-05	0.000854477	0.000615047	1.32979	HES1/CDX2/WNT3A/TGIF2/IGF1/SUFU/KLF4/FGFR1/MAPK7/CCSAP/HNF4A/DVL2/BMP7/NOTCH1/NIPBL/RACGAP1/PHLDA2/CDK1/SIX1/SIX4/SEPT7/WNT5A/DKK1/PHLDB2/GATA3/RACK1/PRKACA/DVL1/COL5A1/CTNNB1/TBX2/BMPR1A/TENM4/NRARP/PTK7/CRB2/SEC24B/SFRP1/STK3/WNT1/COL5A2/NODAL/CDX1/AR/VANGL2/PAFAH1B1/STK4/WNT2B/SNAI1/WNT2/FZD7/OSR1/DMRT2/NPHP3/MYADM/HES7/CLASP1/LAMA5/INSR/NKD1/DVL3/TRAF3IP1/GDNF/AMOT/TBX18/PRKACB/FZD1/FAM129B/S…	86
GO:0060964	regulation of gene silencing by miRNA	biological process	75/9065	106/17381	7.02125e-05	0.000861997	0.00062046	1.35663	ESR1/H3F3B/EGFR/POLR2K/HIST1H3B/POM121/DDX5/MAP2K1/NCOR2/STAT3/NDC1/POLR2D/NUP58/MYCN/AGO1/RAN/NUP62/HIST2H3A/IPO8/NUP50/EIF4G1/POM121C/POLR2I/NUP160/NUP210/HIST2H3D/HIST2H3C/TNRC6A/HIST1H3D/NUP153/POLR2A/POLR2L/TGFB1/POLR2B/LIMD1/RANBP2/HIST2H4B/HIST1H4E/POLR2C/NUP214/AAAS/NUP37/HIST1H3H/PUM1/TPR/POLR2F/NUPL2/AGO2/NUP98/NUP43/ELAVL1/FXR1/FMR1/TRIM71/HIST1H3C/HIST1H3J/HIST1H3F/LIN28A/NUP205/HIST1…	75
GO:0051053	negative regulation of DNA metabolic process	biological process	89/9065	129/17381	7.10793e-05	0.000871368	0.000627206	1.32284	MSH2/BRCA2/GJA1/ATM/HMGA2/FBXW7/TSPYL2/HNRNPU/TP53/PPARG/GMNN/OTUB1/BMPR2/DONSON/NPPC/POLQ/MSH6/CDC6/NF2/BLM/MRE11/RGN/S100A11/GATA3/HNRNPA1/UBR5/SRC/WAPL/SMC3/DFFA/ATG7/KLHL15/TNKS/SLX4/HNRNPC/TRIM28/CDAN1/SMC1A/TGFB1/PDS5A/CTC1/GTPBP4/RIF1/MSH3/XRCC1/PARP1/RPS3/EXOSC10/STAG2/TRIP12/XRCC5/SMG6/PINX1/PAPD5/THOC1/NDFIP1/OGG1/DUSP1/BCL6/GNL3L/RAD17/TP53BP1/CHEK2/TERF2IP/TFIP11/RAD50/MEN1/ERCC1/TIPI…	89
GO:1901215	negative regulation of neuron death	biological process	123/9065	186/17381	7.27212e-05	0.0008902	0.000640761	1.26794	MEF2C/WNT3A/KRAS/BCL2/JUN/MSH2/ROCK1/SOD1/SOD2/SET/LRP1/NRP1/FGF20/AXL/BDNF/ERBB3/MECP2/HMOX1/PPARA/HRAS/HIF1A/CREB1/SIRT1/NTRK2/ILK/TP73/STAT3/NTF3/AKT1/LRRK2/CEBPB/BAX/DLX1/HYOU1/HSP90AB1/TERT/SIX1/IL6/SIX4/BTBD10/EIF4G1/KDM2B/CCL2/NR4A3/ATG7/HIPK2/GPI/EN2/PDPK1/RACK1/AARS/NONO/BRAF/HTRA2/CTNNB1/PSMC1/PPARGC1A/UNC5B/SYNGAP1/PARK7/MDK/TIGAR/ATP13A2/TSC1/AMBRA1/BOK/ATF4/VPS35/NR4A2/IKBKG/GCLM/BCL…	123
GO:0006607	NLS-bearing protein import into nucleus	biological process	21/9065	23/17381	7.32742e-05	0.000895669	0.000644697	1.75065	RERE/KPNA2/TNPO2/TRPS1/KPNA5/KPNB1/RANBP2/IPO4/KPNA1/IPO5/TNPO1/NUP54/VHLL/KPNA4/KPNA3/KPNA6/NCKIPSD/FYB1/NUP35/RANBP6/CBLB	21
GO:0046834	lipid phosphorylation	biological process	78/9065	111/17381	7.39869e-05	0.000903069	0.000650024	1.34734	MET/GRB2/EGFR/FGF20/FGFR1/ERBB3/IP6K2/PIK3R2/FGF2/IRS1/ERBB2/ERBB4/FGF7/PDGFRA/FGF9/PIK3CG/PIP4K2C/PIP4K2B/FRS2/KIT/CD80/FGFR2/BTC/EFR3A/PIKFYVE/IP6K1/PIP5K1A/PTPN11/SMG1/GAB1/PIP5K1C/PIP4K2A/PI4KB/DGKZ/IMPA1/PIK3C2A/PIK3CD/KL/PIK3CA/ZFYVE21/PI4K2B/PIK3R1/EREG/FYN/NRG4/FGFR4/EGF/PIK3C2B/CERK/PDGFB/PIK3C3/DGKG/AGK/FGF5/FAM126A/IMPAD1/KLB/NRG2/DGKD/PDGFA/DGKE/BPNT1/CD86/FGF19/IMPA2/PI4K2A/HBEGF/CD2…	78
GO:0006278	RNA-dependent DNA biosynthetic process	biological process	55/9065	74/17381	7.52999e-05	0.000916439	0.000659647	1.42508	ATM/HNRNPU/MAPK3/MAPK1/HSP90AB1/TERT/CCT3/TNKS1BP1/MRE11/PPIA/HNRNPA1/SRC/HSP90AA1/TNKS/HNRNPC/PTGES3/CTNNB1/WRAP53/CCT5/NOP10/SMG5/CTC1/CCT7/EXOSC10/CCT4/CCT2/RFC1/CCT6A/NHP2/TCP1/XRCC5/SMG6/PINX1/PAPD5/NEK7/MAP3K4/AURKB/MAP2K7/HMBOX1/GNL3L/TERF2IP/SMG7/MAPKAPK5/RAD50/TEP1/POT1/STN1/XRN1/NAT10/PARN/TERF1/DCP2/TERF2/TNKS2/NEK2	55
GO:0032508	DNA duplex unwinding	biological process	55/9065	74/17381	7.52999e-05	0.000916439	0.000659647	1.42508	ANXA1/GTF2H1/RAD51/HMGA1/PURA/DDX3X/GINS2/DDB1/RECQL4/CHD4/TOP2A/MCM5/MCM7/BLM/MCM6/MCM4/GINS1/CUL4B/MRE11/MCM2/G3BP1/DDX1/UBA52/UBB/DDX11/CDC45/ATRX/CHD1/PARP1/XRCC6/CUL4A/RUVBL1/RUVBL2/GTF2H2/UBC/XRCC5/CHD2/BRIP1/ERCC3/SUPV3L1/RAD23B/GINS4/SETX/CHD8/GTF2H5/RAD50/WRN/RPS27A/POT1/DNA2/TWNK/GTF2H3/INO80/CHD3/XPC	55
GO:0031124	mRNA 3'-end processing	biological process	65/9065	90/17381	7.75508e-05	0.000942472	0.000678386	1.38477	CDK9/APP/SRSF11/CPSF1/SRSF9/SRSF1/SRSF7/DDX39A/POLR2D/BARD1/RBM8A/WDR33/PAPOLA/SRSF2/SRSF3/SRSF6/SRRM1/SYMPK/CPSF3/SLBP/SRSF4/ZC3H11A/CSTF3/SRSF5/CCNB1/CPEB3/SNRPA/PABPC1/NELFE/U2AF2/RNPS1/NCBP2/SUPT5H/PABPN1/CASC3/TUT1/CHTOP/EIF4A3/RNF40/GRSF1/POLDIP3/CPSF2/THOC5/THOC1/PCF11/ZFP36L1/DDX39B/ZNF473/CSTF2/CSTF1/RNF20/CDC73/NUDT21/SSU72/PAPOLG/CPSF7/CCNT1/SLU7/LSM11/MTPAP/CSTF2T/ALYREF/ZC3H14/PNPT1/…	65
GO:1990182	exosomal secretion	biological process	18/9065	19/17381	7.78016e-05	0.000942901	0.000678694	1.81646	PDCD6IP/SDC4/HGS/IFNG/SDC1/TSG101/RAB11A/CHMP2A/VPS4A/ATP13A2/RAB7A/COPS5/SNF8/SDCBP/STAM/PRKN/VPS4B/RAB27A	18
GO:0045444	fat cell differentiation	biological process	137/9065	210/17381	7.78298e-05	0.000942901	0.000678694	1.25086	HES1/WNT3A/CEBPA/AKT2/CCND1/E2F1/ASXL2/CREBL2/RNASEL/FOXO1/SH3PXD2B/KLF4/EGR2/PIAS1/MED1/EP300/HMGA2/ZFPM2/JAG1/PPARG/FABP4/CREB1/SIRT1/SLC2A4/PTGS2/SULT1E1/TRIB2/AKT1/SNAI2/PRDM16/CEBPB/ZFP36L2/NIPBL/WWTR1/IL6/ZNF385A/WNT5A/TMEM64/ITGA6/IL11/TRPM4/LRRC8C/CTBP2/GATA3/CTBP1/NR4A3/NR4A1/AXIN1/FRZB/SREBF1/MTOR/MEX3C/TGFB1/XBP1/PPARGC1A/GPX1/INSIG1/SMAD3/ASXL1/ID4/PPARD/TMEM120B/SDF4/ZNF516/NR4A2/ERO…	137
GO:0006979	response to oxidative stress	biological process	261/9065	426/17381	7.7922e-05	0.000942901	0.000678694	1.17473	MET/MYB/UCP2/TP53INP1/FOXO3/ANXA1/BCL2/HSPA1A/JUN/MCL1/SOD1/SOD2/FOXO1/RHOB/TPM1/EGFR/AXL/GCH1/G6PD/CRK/KLF4/MAPK7/SRXN1/ETS1/EZH2/FBXW7/APP/CCNA2/HNRNPD/COL1A1/PRODH/HMOX1/EDN1/CHUK/TP53/BMP7/HIF1A/MAPK3/PDGFRA/SIRT1/MAPK1/TLR4/PTGS2/FBLN5/SLC8A1/MGMT/FOS/SDC1/PTPRK/DNM2/AKT1/LRRK2/MDM2/ADAM9/MAPK8/PSIP1/PRDX3/GJB2/DHFRP1/ECT2/MELK/SELENON/PRNP/SESN2/CDK1/PCNA/FANCD2/IL6/PPP1R15B/PRKAA1/PSAP/PON…	261
GO:0017157	regulation of exocytosis	biological process	114/9065	171/17381	7.85287e-05	0.000948879	0.000682998	1.27825	ANXA1/RAB21/PDCD6IP/SDC4/HMOX1/HGS/IFNG/NOTCH1/RAP1A/SDC1/RAB5A/LRRK2/CFTR/VAMP8/RAC2/TSG101/RIMS3/AP1G1/RIMS4/ITGB2/SYT12/RIMS2/RAP1B/UNC13D/F2RL1/RALB/NCS1/RAB27B/TRIM9/STXBP3/CHMP2A/VAMP7/RAB10/C12orf4/SYT9/LLGL1/ARF1/PDPK1/BRAF/BCR/VPS4A/ATP6AP1/FER/SYT4/RAB2B/RAB26/ABR/NSF/ATP13A2/CACNA1I/RAB7A/SYK/IL4R/RALA/GRIK5/ATP2A2/SNF8/IL1RAPL1/RAB3B/RAB8B/ADORA2B/FMR1/SCAMP5/REST/SDCBP/STAM/VAMP2/SYT…	114
GO:0045669	positive regulation of osteoblast differentiation	biological process	46/9065	60/17381	8.01948e-05	0.000967623	0.000696489	1.46999	MEF2C/ACVR1/CEBPA/PDLIM7/CYR61/IGF1/CLIC1/JAG1/BMP7/ACVR2B/ILK/IFITM1/BMPR2/SMAD5/RUNX2/CEBPB/NPPC/IL6/ACVR2A/GNAS/CTNNBIP1/CTNNB1/FBN2/BMPR1A/ATP6AP1/ID4/JUND/WNT10B/SMAD1/IL6ST/SOX11/GLI3/ZHX3/CEBPD/WNT7B/BMP2/SUCO/TMEM119/DDR2/ATRAID/NPNT/WNT4/MSX2/LTF/TP63/IL6R	46
GO:0051495	positive regulation of cytoskeleton organization	biological process	134/9065	205/17381	8.09702e-05	0.000975581	0.000702218	1.25331	NTRK3/MET/CDC42/HSPA1A/PAK1/GRB2/TPM1/NRP1/SH3PXD2B/SDC4/TAC1/PRKCE/MECP2/P2RX7/CDKN1B/EDN1/HRAS/TEK/CTGF/NTF3/PFN1/LPAR1/RHOA/TGFBR1/PSRC1/VASP/CDC42EP4/PFDN2/ABI2/NF2/SPIRE1/CLIP1/NUP62/ARPC5/F2RL1/SYNPO2L/CTTN/CEP120/ARF1/CORO1B/MTOR/HSPA1B/BRAF/SORBS3/DYNC1H1/BAIAP2/RANBP3/FER/JMY/RANBP2/NPM1/TRIM27/WASHC2C/RPS3/CYFIP1/TSC1/SMAD3/CFL1/HAX1/WASH3P/PDXP/ABL1/GMFB/PPM1F/SFRP1/CFL2/RAC1/ICAM1/ROC…	134
GO:0008064	regulation of actin polymerization or depolymerization	biological process	108/9065	161/17381	8.1516e-05	0.000979519	0.000705052	1.28619	GRB2/TMSB4X/PLEKHG2/PREX1/PRKCE/TWF1/TWF2/PFN1/CXCL12/VASP/CDC42EP4/ABI2/SPIRE1/LIMA1/CAPZB/PPP1R9A/CAPZA1/ARPC5/DMTN/F2RL1/CTTN/CAPG/TMOD3/PLEKHH2/ARF1/CORO1B/MTOR/BAIAP2/FER/SSH2/JMY/MTPN/ARFGEF1/TRIM27/WASHC2C/CIT/CYFIP1/SPTBN1/SPTBN2/CFL1/RDX/SPTAN1/HAX1/WASH3P/PDXP/SPTB/GMFB/CFL2/ICAM1/ACTR2/ARF6/PRKCD/BAG4/CAPZA2/TMOD1/HIP1R/FMN1/BBS4/SEMA5A/PFN4/ALOX15/WDR1/MYADM/CCL11/ACTR3B/WASL/RICTOR/N…	108
GO:0014065	phosphatidylinositol 3-kinase signaling	biological process	87/9065	126/17381	8.15297e-05	0.000979519	0.000705052	1.3239	F2/EGFR/IGF1/KLF4/FGFR1/ERBB3/PIK3R2/PTK2/IER3/IRS1/IGF1R/EDN1/NF1/PTPN13/ERBB2/ERBB4/SOX9/MAPK3/PDGFRA/SIRT1/MAPK1/NTRK2/FLT1/KDR/PIK3CG/TEK/FLT3/AKT1/PIP4K2C/PIP4K2B/KIT/F2RL1/NOP53/GATA3/SEMA4D/PRR5/TSC2/PIP5K1A/UNC5B/PIP5K1C/PTEN/PIP4K2A/FBXL2/PPARD/HAX1/C1QBP/SERPINE2/SERPINA12/PIK3C2A/PIK3CD/IL18/CBL/PIK3CA/PLEKHA1/ZFP36L1/STAMBP/DAB2IP/F2R/PPP2R5C/PIK3R1/CCL5/BECN1/FYN/INS/NYAP2/TWIST1/RGL…	87
GO:0051186	cofactor metabolic process	biological process	258/9065	421/17381	8.34416e-05	0.00100106	0.000720558	1.17502	HDAC4/TPI1/SLC25A1/HACD2/MTHFD2/GPD2/CPOX/ADPGK/PKM/IGF1/POM121/PGM2/GCH1/G6PD/PNP/PIPOX/P2RX7/HMOX1/PPARA/HIF1A/HK2/PTGS2/STAT3/SHMT2/AKR1C2/NDC1/TP53I3/SHMT1/MCCC2/TECR/NUP58/DHFRP1/MAT2A/PARP16/TYMS/MTHFD1/PDXK/HMGCR/COX10/PRKAA1/PDZD11/NUP62/AMD1/RFK/SCD5/CBR4/PGD/ABCB6/COQ6/NUP50/SUCLA2/GPAT4/POM121C/PRKAG1/HSD17B8/MTHFS/NUP160/NUP210/NT5E/FOLR1/TKT/DCAKD/COQ4/LDHA/ACLY/COASY/GPI/MTHFD1L/DCX…	258
GO:0009267	cellular response to starvation	biological process	93/9065	136/17381	8.36916e-05	0.00100263	0.000721689	1.31115	UCP2/CDKN1A/BCL2/JUN/FOXO1/EHMT2/KLF10/WNT9B/FAS/TP53/MAPK3/SIRT1/MAPK1/PMAIP1/BMPR2/LRRK2/MAPK8/SESN2/MAX/PRKAA1/GLUL/FNIP1/STK24/USP33/RALB/FADS1/HNRNPA1/ATG7/SREBF1/MTOR/XBP1/HSPA8/RIPOR1/LARS/SLC38A2/MARS/MYBBP1A/SLC2A1/CLEC16A/DEPDC5/ATF3/AMBRA1/SREBF2/ATF4/FBXO22/PRKAA2/SFRP1/HSPA5/HFE/EIF2S1/GABARAPL1/SH3GLB1/MTMR3/CPEB4/BECN1/WNT2B/NUAK2/SESN1/SESN3/RRP8/RNF152/GBA/GABARAP/PCSK9/CTSV/WRN/…	93
GO:0044344	cellular response to fibroblast growth factor stimulus	biological process	96/9065	141/17381	8.40327e-05	0.00100529	0.000723601	1.30545	SPRED1/TIA1/GRB2/THBS1/PTBP1/FGF20/POLR2K/FGFR1/FGF2/PRKD2/COL1A1/CXCL8/FGF7/MAPK3/MAPK1/CD44/FGF9/CTGF/RBFOX2/SNAI2/RUNX2/POLR2D/ZFP36L2/SHCBP1/SULF2/RAB14/DSTYK/WNT5A/FRS2/SPRED2/SPRY2/FGFR2/HNRNPH1/NPTN/GPC1/POLR2I/GATA3/HNRNPA1/CCL2/NR4A1/UBA52/UBB/POLR2A/TBX1/POLR2L/CTNNB1/POLR2B/CDC5L/PTPN11/NCBP2/CEP57/POLR2C/NDST1/HNRNPM/IQGAP1/UBC/SPRY1/FIBP/POLR2F/TIAL1/HNRNPF/GCLM/SFRP1/KL/CBL/SHOC2/ZF…	96
GO:0097306	cellular response to alcohol	biological process	44/9065	57/17381	8.58961e-05	0.00102467	0.000737552	1.48008	TP53INP1/DNMT3A/BRCA1/ADCY6/OSBPL7/KLF4/PRKCE/RAD51/SPI1/PPARG/PTCH1/AKT1/CDH1/BLM/LRP8/PRKAA1/HMGCS1/JUP/GNB1/LARP1/CTNNB1/CTNNA1/AKAP8/ACACA/PTEN/SMO/PRKAA2/INHBA/SFRP1/PTGER4/LRP6/KLF2/DYNAP/KCNMB1/XRN1/AACS/PTGDR/TNFSF4/SPIDR/CYBB/GNG2/P2RY6/ITPR2/GLRA2	44
GO:1903051	negative regulation of proteolysis involved in cellular protein catabolic process	biological process	44/9065	57/17381	8.58961e-05	0.00102467	0.000737552	1.48008	SUFU/FHIT/N4BP1/TAF9/HSP90AB1/SENP1/EPHA4/BAG5/NOP53/SMARCC1/UBAC2/CCAR2/BAG6/PARK7/SCO1/DERL2/CLEC16A/UBXN1/RPL5/RPS7/USP19/USP25/EFNA1/WNT1/HFE/WAC/YOD1/SDCBP/ALAD/USP14/RYBP/PSMF1/TRIM39/TLK2/UBE2G2/OPHN1/SVIP/SHH/GIPC1/PDCL3/KLHL40/TAF1/SGTA/RPL23	44
GO:0006409	tRNA export from nucleus	biological process	28/9065	33/17381	8.68662e-05	0.00103186	0.000742725	1.62686	POM121/NDC1/NUP58/RAN/NUP62/NUP50/POM121C/NUP160/NUP210/XPOT/NUP153/RANBP2/NUP214/AAAS/NUP37/NOL6/TPR/NUPL2/NUP98/NUP43/NUP205/NUP155/SEH1L/NUP54/NUP93/NUP188/NUP85/NUP35	28
GO:0051204	protein insertion into mitochondrial membrane	biological process	28/9065	33/17381	8.68662e-05	0.00103186	0.000742725	1.62686	E2F1/BCL2/YWHAQ/TP53/BCL2L11/TP73/YWHAZ/PMAIP1/MAPK8/BAX/DYNLL2/YWHAH/SFN/NMT1/PPP3R1/PPP1R13B/YWHAE/YWHAB/TFDP1/YWHAG/TFDP2/BMF/DYNLL1/MOAP1/COX18/BID/TP63/CASP8	28
GO:0071431	tRNA-containing ribonucleoprotein complex export from nucleus	biological process	28/9065	33/17381	8.68662e-05	0.00103186	0.000742725	1.62686	POM121/NDC1/NUP58/RAN/NUP62/NUP50/POM121C/NUP160/NUP210/XPOT/NUP153/RANBP2/NUP214/AAAS/NUP37/NOL6/TPR/NUPL2/NUP98/NUP43/NUP205/NUP155/SEH1L/NUP54/NUP93/NUP188/NUP85/NUP35	28
GO:0016051	carbohydrate biosynthetic process	biological process	128/9065	195/17381	8.72281e-05	0.0010347	0.000744769	1.25858	AKT2/TPI1/UGP2/FOXO1/SLC25A1/GPD2/IGF1/PGM2/CHST11/G6PD/ISYNA1/IRS1/NFKB1/PPARA/IGF2/AKT1/SESN2/C1QTNF2/CHST14/IL6/B3GNT2/PGD/KAT2A/MPDU1/RGN/SLC25A10/B4GALT1/CLTC/TKT/EPM2AIP1/UBA52/UBB/ST3GAL2/GPI/MTOR/SLC35B4/GSK3A/TGFB1/ENO1/AGL/MAEA/AKR1B1/GAPDH/RANBP2/PPARGC1A/PPP1CB/PGAM1/SOGA1/ALDOA/MDH2/NDST1/SLC37A4/AP2A1/SLC2A1/UBC/ATF3/ATF4/GOT2/BPGM/TALDO1/IMPA1/SERPINA12/SLC25A13/MDH1/AKR1A1/DYRK2/S…	128
GO:0048013	ephrin receptor signaling pathway	biological process	63/9065	87/17381	8.74606e-05	0.001036	0.000745704	1.38844	NTRK3/CDC42/ROCK1/PAK1/CRK/PTK2/HRAS/RHOA/VAV3/EPHA2/EPHA4/YES1/SS18/ARPC5/AP2S1/ACTB/SRC/EPHA7/AP2B1/AP2A2/ACTG1/TIAM1/PTPN11/EFNB1/VAV2/AP2A1/EFNB2/EPHB4/EFNA1/RAC1/ROCK2/ACTR2/RBPJ/SDCBP/CDK5R1/FYN/MMP9/NCSTN/LYN/ARHGEF28/MYL12A/WASL/SDC2/EPHB2/EFNA3/APH1A/AP2M1/EFNA2/GRIN2B/EFNA5/EPHB3/ANKS1A/EPHA1/ARPC3/ARPC4/ARPC1B/PAK3/ARPC2/SIPA1L1/MMP2/GIT1/PSENEN/EPHA6	63
GO:0007584	response to nutrient	biological process	115/9065	173/17381	8.82864e-05	0.00104431	0.000751687	1.27456	GATA4/CCND1/DNMT3A/DNMT3B/EGFR/SLC16A1/PKM/MED1/VCAM1/COL1A1/PIM1/HMOX1/BMP7/PPARG/SRF/IGFBP2/PTGS2/SLC8A1/TGFBR2/MGMT/SNAI2/MDM2/TYMS/KANK2/HMGCR/SRSF2/HMGCS1/BGLAP/SPP1/GSTP1/SLC27A4/GNAI2/OXCT1/FOLR1/TRIM24/CCL2/ARG1/LDHA/MTOR/TGFB1/XBP1/AGL/UCP3/EEF2/USF1/ALDH1A2/PTEN/SETDB1/GNPAT/PPARD/CDKN2D/BRIP1/TXN2/ZNF354A/GCLM/OGG1/SFRP1/ACSL4/ACSL1/ADIPOR2/RPS6KB1/OGT/ATP2B1/ITGA2/ALAD/BECN1/STC2/ADA/…	115
GO:0009755	hormone-mediated signaling pathway	biological process	149/9065	231/17381	9.01301e-05	0.00106429	0.000766071	1.23675	ESR1/CCNE1/PAK1/FOXP1/RARG/ARID1A/BRCA1/DDX5/PIAS1/MED1/EP300/HNF4A/NR1I2/RXRB/MED16/PPARA/UBE2I/CLOCK/BMP7/PPARG/NRIP1/SIRT1/HDAC1/RB1/EGLN2/RBFOX2/NR6A1/CREBRF/LEF1/KANK2/CRY2/NR3C1/KMT2D/CBFB/RAN/RNF6/YWHAH/MED4/NUP62/PGR/CALR/PGRMC2/NR5A2/TSHR/UBR5/SRC/NR4A3/NR4A1/AXIN1/NCOA6/FKBP4/NCOA3/WBP2/DDX54/PAGR1/NR1D2/CNOT1/DDX17/CTNNB1/MED14/SMARCA4/PTPN11/PPARGC1A/KDM3A/RBM14/PARK7/CNOT9/PARP1/DNAJ…	149
GO:0046328	regulation of JNK cascade	biological process	112/9065	168/17381	9.03549e-05	0.00106429	0.000766071	1.27825	CDC42/TRAF6/ZEB2/PDCD4/PAK1/HACD3/EGFR/APP/IGF1R/DVL2/EDN1/CD40LG/HRAS/MAP3K11/TLR4/TP73/CTGF/RB1CC1/AKT1/GADD45A/HMGB1/PHLPP1/EPHA4/RASSF2/WNT5A/MAP3K21/GSTP1/F2RL1/DKK1/PTPN22/ZNF622/HIPK3/PTPN1/RIPK2/MAP4K2/AXIN1/HIPK2/MINK1/TIAM1/DUSP3/MAP3K2/TAOK3/RPS3/DNAJA1/DBNL/SPAG9/RAPGEF1/ITCH/TAOK2/SYK/FLT4/COPS5/MAP3K4/FKTN/SFRP1/STK3/ERN1/MAP3K7/RAP2A/MAP2K7/TNF/FZD4/ZMYND11/VANGL2/PAFAH1B1/DAB2IP/T…	112
GO:0090090	negative regulation of canonical Wnt signaling pathway	biological process	112/9065	168/17381	9.03549e-05	0.00106429	0.000766071	1.27825	FOXO3/FOXO1/LRP4/CYLD/DVL2/SOX2/SOX9/HDAC1/IGFBP2/NOTCH1/SNAI2/LEF1/WWTR1/PSMD9/WNT5A/CSNK1A1/TMEM64/DKK1/PSME1/G3BP1/CDH2/CAV1/AXIN1/UBA52/PSMD3/UBB/PSMB2/TMEM131L/FRZB/DVL1/GSK3A/PSMD4/PSMD11/LIMD1/JADE1/PSMC1/PSMB3/PSMA7/PSMC5/KREMEN1/RAPGEF1/CTNND1/PSMD2/UBC/PSMD6/PSMC4/PSMD1/PSME3/PSMD7/KLHL12/APC/PSMA2/PSMD8/PSMD13/PSMC3/SFRP1/STK3/DKK2/APOE/GLI1/GSK3B/AXIN2/ZNRF3/FZD6/STK4/DAB2IP/TCF7L2/PR…	112
GO:0022037	metencephalon development	biological process	71/9065	100/17381	9.0979e-05	0.00107015	0.000770286	1.36134	BCL2/PAK1/PTBP2/ARCN1/RERE/MAP2K1/EZH2/MECP2/HNRNPD/SCRIB/LPAR1/ZNF365/UQCRQ/KAT2A/GLI2/GART/CKB/AARS/NANOS1/HERC1/PTPN11/MTPN/PPARGC1A/COQ8B/XRCC1/MDK/FOXC1/SPTBN2/SEMA4C/GNPAT/SMO/ABL1/SDF4/SERPINE2/SEC24B/HSPA5/WNT1/GLI1/FZD4/ATP7A/RORA/CDK5R1/LRP6/PTPRS/AGTPBP1/ATIC/LDB1/SSTR1/NEUROD2/EN1/SSTR3/KIF14/NLGN4X/SSTR2/PHOX2A/WNT7A/OTX1/LMX1A/ASCL1/FAIM2/PROX1/LHX5/ATRN/ABAT/DLL1/NCOA1/OGDH/B4GALT2…	71
GO:1902653	secondary alcohol biosynthetic process	biological process	51/9065	68/17381	9.16877e-05	0.00107698	0.000775203	1.43803	SOD1/G6PD/CES1/NFYB/CFTR/NSDHL/IDI1/TM7SF2/HMGCR/PRKAA1/LBR/RAN/HMGCS1/NFYA/SP1/ACLY/FDFT1/SREBF1/CYB5R3/KPNB1/FASN/SCD/ACACA/INSIG1/MBTPS1/EBP/SREBF2/CNBP/ACAA2/GGPS1/PRKAA2/ERLIN1/LSS/DHCR7/APOE/SC5D/MSMO1/SQLE/PLPP6/ERG28/CYP51A1/INSIG2/GPAM/ELOVL6/DHCR24/MVK/APOB/ACACB/FGF1/MBTPS2/APOA1	51
GO:0090174	organelle membrane fusion	biological process	109/9065	163/17381	9.22045e-05	0.00108154	0.000778487	1.28217	AKT2/ANXA1/ANXA2/RABGAP1L/USO1/SNAPIN/UVRAG/VAV3/TBC1D1/VAMP8/RAB34/ANKFY1/SYT12/SAMD9L/KIF5B/CALR/SYTL2/TRIM9/GNAI3/TBC1D9/VAMP7/SYT9/SGSM1/TMEM175/BET1/TAPBP/STX16/VPS4A/TBC1D10B/TBC1D22A/SYT4/RABGAP1/STX7/TBC1D9B/GOSR1/VCPIP1/ANKRD27/VPS18/RAB7A/VPS11/C2CD5/GRIK5/EVI5/SYT11/VPS41/USP6NL/VAMP3/MFN1/CHMP2B/TBC1D13/EVI5L/SEC22C/VAMP2/USP6/VAMP1/TBC1D5/SYT13/SNAP25/SYT7/TBC1D12/TBC1D8/TBC1D8B/TBC1…	109
GO:0043123	positive regulation of I-kappaB kinase/NF-kappaB signaling	biological process	122/9065	185/17381	9.33064e-05	0.00109294	0.000786695	1.26443	PLK2/TLR2/FADD/TRAF6/IRAK1/PPM1A/GJA1/PRKCE/IKBKB/APP/HMOX1/UBE2I/CHUK/TLR4/IKBKE/PTGS2/MTDH/TBK1/AKT1/LPAR1/RHOA/VAPA/ECT2/PELI2/TMEM9B/NUP62/C18orf32/TRIM22/IFIT5/WLS/LGALS1/F2RL1/FLNA/CCDC22/RHOC/ANKRD17/RIPK2/MIER1/SLC20A1/UBA52/UBB/NDFIP2/UBE2N/CTNNB1/BRD4/TFG/TICAM1/AKAP13/MAP3K3/UBC/CXXC5/TNFRSF10B/ABL1/EEF1D/MAVS/TAB2/NDFIP1/IKBKG/MAP3K7/IL18/TNF/LITAF/F2R/FKBP1A/UBE2V1/TRIM8/S100A12/FYN/…	122
GO:0051272	positive regulation of cellular component movement	biological process	287/9065	473/17381	9.52087e-05	0.00111368	0.000801618	1.1634	DRD1/NTRK3/STMN1/MET/ACVR1/AKT2/FADD/HDAC4/BCL2/JUN/PAK1/SOD2/FOXP1/RHOB/THBS1/NRP1/EGFR/CYR61/IGF1/TMSB4X/EPB41L4B/SHTN1/PREX1/LAMC2/CRK/TAC1/FGFR1/VEGFA/PRKCE/ETS1/APP/FN1/FGF2/PTK2/PRKD2/IL1R1/COL1A1/CXCL8/PLAU/IGF1R/CSF1/EDN1/HRAS/BMP7/HIF1A/FGF7/SOX9/MAPK3/PDGFRA/SERPINE1/MAPK1/FLT1/KDR/ILK/PTGS2/PODXL/SLC8A1/TGFBR2/TEK/IFNG/NOTCH1/MAPRE1/NTF3/CPNE3/BMPR2/AKT1/PFN1/SNAI2/MDM2/ADAM9/PDPN/LPAR…	287
GO:0007041	lysosomal transport	biological process	66/9065	92/17381	9.59696e-05	0.00112102	0.000806904	1.37551	CDX2/RHOB/GAK/AP3D1/AP3B1/HGS/SNAPIN/LRRK2/ANKFY1/TSG101/RAB12/AP1G1/HMGXB4/VPS53/HOOK1/VAMP7/ARF1/FAM160A2/MGRN1/VPS4A/HSPA8/LARS/LYST/TRAK2/GCC2/TRAK1/VPS18/RAB7A/VPS11/WASH3P/VPS35/NCOA4/SCARB2/NAGPA/UBXN6/HOOK3/VPS51/AP3M1/VPS41/VCP/CHMP2B/M6PR/SNX16/TMEM106B/EHD3/VPS39/PCSK9/DTX3L/VPS33A/KIF13A/VPS52/ATG14/PRKN/LAMP2/CHMP3/VPS4B/GNPTAB/SNX27/TGFBRAP1/ARSB/VPS54/SORT1/CLU/SPTBN5/RBSN/GNPTG	66
GO:0046031	ADP metabolic process	biological process	74/9065	105/17381	9.63711e-05	0.00112415	0.000809157	1.35129	HDAC4/TPI1/ADPGK/PKM/IGF1/POM121/P2RX7/PPARA/HIF1A/HK2/STAT3/NDC1/NUP58/PRKAA1/NUP62/NUP50/POM121C/PRKAG1/NUP160/NUP210/LDHA/GPI/NUP153/ENO1/PFKP/GAPDH/OGDHL/RANBP2/PPARGC1A/PGAM1/ALDOA/PFKFB4/TIGAR/NUP214/AAAS/NUP37/BPGM/TPR/AK2/NUPL2/PRKAA2/HK1/NUP98/NUP43/DDIT4/OGT/PGK1/PFKFB2/INS/ENO2/NUP205/NUP155/SEH1L/PGM2L1/PGAM4/NUP54/INSR/EIF6/ENO4/NUP93/ESRRB/ENTPD5/NUP188/MLXIPL/DHTKD1/ALDOC/NUP85/CBF…	74
GO:0043407	negative regulation of MAP kinase activity	biological process	56/9065	76/17381	9.74669e-05	0.00113379	0.000816098	1.4128	SPRED1/PDCD4/RGS3/MAPK7/NF1/BMP7/TP73/HMGCR/DUSP8/NUP62/SPRED2/GSTP1/SPRY2/PTPN22/HIPK3/PTPN1/CAV1/DUSP7/DUSP18/DUSP3/DNAJA1/UCHL1/SPRY1/PPP2CA/SFRP1/DUSP1/APOE/DUSP5/PTPRJ/PRKCD/DAB2IP/MAPK8IP1/LYN/DUSP16/DUSP4/LAX1/GBA/DUSP19/STK38/DUSP2/AIDA/DUSP9/IRAK3/ZNF675/DUSP6/PAQR3/PPP2R1A/DUSP10/DUSP22/RGS4/ADIPOQ/IL1B/DUSP14/GPS1/PTPN6/RGS2	56
GO:0048194	Golgi vesicle budding	biological process	56/9065	76/17381	9.74669e-05	0.00113379	0.000816098	1.4128	GOLPH3L/SEC23IP/CTSC/TRAPPC3/USO1/VAPA/SEC31A/GBF1/TMED2/SEC23A/RAB1B/PPP6R3/TRAPPC10/GOLPH3/MYO18A/FOLR1/SEC16A/PEF1/BET1/MCFD2/NSF/INSIG1/TFG/TMED9/VAPB/KLHL12/SEC24B/SCFD1/TRAPPC1/TRAPPC9/SAR1B/PREB/SEC24A/ANKRD28/LMAN1/CNIH1/SAR1A/TMED10/GOLGA2/TRAPPC6B/TGFA/CUL3/PPP6R1/RAB1A/CD59/MIA3/PPP6C/TRAPPC2/GOSR2/TRAPPC4/TRAPPC2L/SEC24D/TBC1D20/ATP8A1/CSNK1D/SEC24C	56
GO:0000079	regulation of cyclin-dependent protein serine/threonine kinase activity	biological process	61/9065	84/17381	9.85015e-05	0.00114267	0.000822488	1.39238	CDC25A/CCND2/CEBPA/CCND1/CDKN1A/GTF2H1/CCND3/CCNE2/EGFR/CCNL1/CDKN1B/CDKN3/CDKN2A/AKT1/GADD45A/PSRC1/PKMYT1/CDC6/CDC37/BLM/HHEX/MAPRE3/MYOCD/HERC5/SFN/CCNB1/SRC/CCNT2/CCNY/GTPBP4/PLK1/CCNQ/PTEN/HEXIM1/CDKN2D/APC/CKS1B/CCNG1/CASP3/CCNYL1/CCNK/KAT2B/CDK5R1/CNPPD1/PKD1/TNFAIP3/MEN1/NR2F2/LATS2/CKS2/CCNT1/PDGFB/ADAM17/CCNL2/TFAP4/HSPA2/LATS1/WEE2/PROX1/CDKN2B/SERTAD1	61
GO:0032392	DNA geometric change	biological process	61/9065	84/17381	9.85015e-05	0.00114267	0.000822488	1.39238	ANXA1/GTF2H1/RAD51/TP53/HMGA1/PURA/DDX3X/HMGB1/GINS2/DDB1/RECQL4/CHD4/TOP2A/MCM5/MCM7/BLM/MCM6/MCM4/GINS1/CUL4B/MRE11/SMARCA1/MCM2/G3BP1/DDX1/UBA52/UBB/DDX11/CDC45/ATRX/CHD1/PARP1/XRCC6/CUL4A/RUVBL1/RUVBL2/GTF2H2/UBC/XRCC5/CHD2/BRIP1/ERCC3/SUPV3L1/HNRNPA2B1/RAD23B/GINS4/HMGB3/SETX/CHD8/GTF2H5/RAD50/WRN/RPS27A/POT1/DNA2/TWNK/HMGB2/GTF2H3/INO80/CHD3/XPC	61
GO:0033146	regulation of intracellular estrogen receptor signaling pathway	biological process	32/9065	39/17381	0.000100221	0.00116102	0.000835696	1.57323	ESR1/PAK1/BRCA1/MED1/KANK2/KMT2D/CBFB/SRC/AXIN1/WBP2/PAGR1/CNOT1/CNOT9/PARP1/PHB2/AR/YAP1/CARM1/UFL1/GPAM/UBA5/CNOT2/ZNF366/FOXH1/RUNX1/CYP7B1/UFM1/STRN3/LATS1/TP63/KCTD6/FOXA1	32
GO:0090101	negative regulation of transmembrane receptor protein serine/threonine kinase signaling pathway	biological process	77/9065	110/17381	0.000100864	0.00116687	0.000839903	1.34216	ACVR1/HSPA1A/PPM1A/SNX6/CHST11/SIRT1/TGFBR2/NOTCH1/DNM2/SMAD2/TGFBR1/PRDM16/DLX1/TGFBR3/SPART/MTMR4/WNT5A/FBN1/DKK1/CD109/LEMD3/NBL1/CAV1/BCL9L/UBA52/UBB/HIPK2/BAMBI/PDPK1/SKI/TRIM33/FBN2/TGFB1/PEG10/SMAD3/CTDSPL2/DACT2/SMURF1/UBC/ABL1/LRP2/SFRP1/HSPA5/WNT1/TOB1/ONECUT2/SMAD6/SKIL/NOG/SMAD7/PIN1/GREM1/ONECUT1/SMURF2/GLG1/TBX20/WFIKKN2/ZNF451/RPS27A/CHRDL1/GREM2/BMPER/ADAM17/PMEPA1/FZD1/VASN/NKX2-…	77
GO:0000188	inactivation of MAPK activity	biological process	23/9065	26/17381	0.000101885	0.00117384	0.000844924	1.69614	SPRED1/RGS3/DUSP8/SPRED2/CAV1/DUSP7/DUSP18/DUSP3/PPP2CA/DUSP1/DUSP5/DUSP16/DUSP4/LAX1/DUSP2/DUSP9/DUSP6/PPP2R1A/DUSP10/DUSP22/RGS4/DUSP14/GPS1	23
GO:0032069	regulation of nuclease activity	biological process	23/9065	26/17381	0.000101885	0.00117384	0.000844924	1.69614	HSPA1A/SIRT1/AKT1/BAX/HMGB1/PARP16/PCNA/PTPN1/DFFA/DDX11/NPM1/RPS3/VAPB/TMBIM6/HSPA5/ERN1/PRKCD/DAB2IP/BAK1/HMGB2/OAS3/TERF1/TERF2	23
GO:0033598	mammary gland epithelial cell proliferation	biological process	23/9065	26/17381	0.000101885	0.00117384	0.000844924	1.69614	CCND1/ESR1/HOXA5/IQGAP3/BRCA2/MED1/MAPK1/CEBPB/BAX/EPHA2/BTRC/WNT5A/GATA3/ZNF703/GPX1/PHB2/RREB1/ID2/ROBO1/STAT6/KDM5B/RTN4/PYGO2	23
GO:0006732	coenzyme metabolic process	biological process	220/9065	355/17381	0.000104553	0.00120172	0.000864992	1.18823	HDAC4/TPI1/SLC25A1/HACD2/MTHFD2/GPD2/ADPGK/PKM/IGF1/POM121/PGM2/GCH1/G6PD/PNP/PIPOX/P2RX7/PPARA/HIF1A/HK2/PTGS2/STAT3/SHMT2/NDC1/TP53I3/SHMT1/MCCC2/TECR/NUP58/DHFRP1/MAT2A/PARP16/TYMS/MTHFD1/PDXK/HMGCR/PRKAA1/PDZD11/NUP62/AMD1/RFK/SCD5/CBR4/PGD/COQ6/NUP50/SUCLA2/GPAT4/POM121C/PRKAG1/HSD17B8/MTHFS/NUP160/NUP210/NT5E/FOLR1/TKT/DCAKD/COQ4/LDHA/ACLY/COASY/GPI/MTHFD1L/DCXR/GART/NUP153/FASN/ENO1/PFKP/S…	220
GO:0046034	ATP metabolic process	biological process	169/9065	266/17381	0.000104591	0.00120172	0.000864992	1.21818	HDAC4/TPI1/HSPA1A/MSH2/ATP6V0A1/ADPGK/PKM/IGF1/TMSB4X/POM121/ATP6V1B2/MECP2/P2RX7/PPARA/HIF1A/HK2/STAT3/NDC1/NUP58/CDK1/ATP5B/UQCRQ/COX10/PRKAA1/NUP62/NUP50/PDE12/ATP6V1A/POM121C/PRKAG1/NUP160/NDUFS4/NUP210/CCNB1/CYCS/LDHA/COX6B1/UQCRC1/SDHA/GPI/NUP153/ATP5G3/HSPA1B/NDUFB10/ATP5S/TGFB1/ENO1/PFKP/NDUFS7/HSPA8/GAPDH/OGDHL/RANBP2/PPARGC1A/PGAM1/ALDOA/PFKFB4/PARK7/PARP1/TIGAR/COX7C/NUP214/AAAS/NDUFS6…	169
GO:0032092	positive regulation of protein binding	biological process	64/9065	89/17381	0.000108644	0.0012449	0.000896068	1.37879	MEF2C/WNT3A/PLK2/LRP1/NRP1/ANXA2/BDNF/EP300/APP/MAPRE1/LRRK2/HSP90AB1/TERT/NMD3/EPHA4/MAPRE3/RAN/WNT5A/USP33/RALB/RAPGEF2/RIPK2/CAV1/EPB41/HIPK2/BAMBI/TIAM1/PLXND1/PARK7/TICAM1/ABL1/ARRB1/FLOT1/STK3/APOE/GSK3B/AMFR/HFE/B2M/STK4/GNL3L/FKBP1A/TCF7L2/ITGA2/TRIB3/MMP9/PKD1/HIP1R/MEN1/DTX3L/HERPUD1/CAPRIN2/BMP2/ADD2/TRAF2/SPPL3/DERL1/ADD1/PRKN/PLCL1/STPG1/TAF1/TIRAP/LFNG	64
GO:0060996	dendritic spine development	biological process	64/9065	89/17381	0.000108644	0.0012449	0.000896068	1.37879	MEF2C/CDC42/PLK2/ARF4/LRRK2/LPAR1/ZNF365/ITPKA/EPHA4/LRP8/PPP1R9A/HDAC2/UBA6/CAPRIN1/IL2/CPEB3/ARF1/PAK4/MTOR/TIAM1/DVL1/BAIAP2/SLC9A6/ZMYND8/ARID1B/PAK2/PTEN/CFL1/NEURL1/ARC/CAMK2B/SRGAP2/MAPK6/EFNA1/APOE/ACSL4/SRCIN1/PAFAH1B1/ACTR2/FMR1/ARF6/CDK5R1/SLC12A5/PDLIM5/PTPRS/ASAP1/LLPH/DISC1/SDK1/FOXO6/WASL/EPHB2/DLG5/CAPRIN2/BHLHB9/FSTL4/WNT7A/EPHB3/C21orf91/PAK3/SIPA1L1/NRG1/SHANK3/EEF2K	64
GO:0002521	leukocyte differentiation	biological process	290/9065	479/17381	0.000109443	0.00125235	0.000901433	1.16083	MEF2C/MYB/HLA-G/CDC42/CEBPA/TLR2/FADD/HDAC4/ANXA1/TRAF6/BCL2/JUN/MSH2/CDK6/SOD1/FOXP1/MAFB/NOTCH2/LRRC8A/AP3D1/AP3B1/ANXA2/ZEB1/AXL/PREX1/HOXA7/ATM/MED1/VEGFA/EP300/TUSC2/PNP/APP/VCAM1/CYLD/KLF10/LIF/JUNB/CSF1/NFATC2/CD40LG/NF1/FAS/ERBB2/SPI1/PPARG/SRF/SP3/CREB1/SIRT1/RB1/TLR4/MERTK/TGFBR2/IFNG/STAT3/FOS/FLT3/RUNX2/OSTM1/CD46/CEBPB/ZFP36L2/BAX/FANCA/HMGB1/LEF1/EPHA2/GLO1/NLRP3/TJP2/FANCD2/SOX4/IL…	290
GO:0007183	SMAD protein complex assembly	biological process	14/9065	14/17381	0.000109652	0.00125303	0.000901927	1.91737	PPM1A/SMAD4/SMAD2/TGFB1/PARP1/SMAD3/SMAD1/ZFYVE9/SMAD6/FKBP1A/TBX20/PMEPA1/EID2/LDLRAD4	14
GO:0006090	pyruvate metabolic process	biological process	92/9065	135/17381	0.00011105	0.00126729	0.000912189	1.30666	HDAC4/TPI1/ADPGK/SLC16A1/PKM/IGF1/POM121/P2RX7/PPARA/HIF1A/HK2/STAT3/NDC1/NUP58/GLO1/PRKAA1/NUP62/NUP50/POM121C/PRKAG1/NUP160/NUP210/NR4A3/LDHA/GPI/NUP153/ENO1/PFKP/GAPDH/OGDHL/PDHA1/RANBP2/PPARGC1A/PGAM1/HAGH/ALDOA/PFKFB4/PDHX/TIGAR/NUP214/AAAS/NUP37/MPC1/BPGM/TPR/NUPL2/ACOT12/PRKAA2/HK1/DLAT/LDHB/NUP98/NUP43/PDHB/DDIT4/OGT/PDP2/PGK1/PDK1/PFKFB2/INS/ENO2/NUP205/NUP155/SEH1L/PGM2L1/PGAM4/PDPR/PDK…	92
GO:0009199	ribonucleoside triphosphate metabolic process	biological process	189/9065	301/17381	0.000111685	0.00127282	0.000916169	1.20393	HDAC4/TPI1/HSPA1A/MSH2/ATP6V0A1/ADPGK/PKM/IGF1/TMSB4X/POM121/ATP6V1B2/MECP2/P2RX7/PPARA/HIF1A/HK2/STAT3/LRRK2/NDC1/NUP58/CDK1/ATP5B/UQCRQ/COX10/PRKAA1/NUP62/NUP50/PDE12/ATP6V1A/POM121C/PRKAG1/NUP160/GNAI3/NDUFS4/NUP210/IMPDH1/CCNB1/CYCS/LDHA/COX6B1/UQCRC1/SDHA/GPI/NUP153/ATP5G3/HSPA1B/NDUFB10/ATP5S/TGFB1/ENO1/PFKP/NDUFS7/HSPA8/GAPDH/OGDHL/RANBP2/PPARGC1A/PGAM1/ALDOA/PFKFB4/PARK7/PARP1/TIGAR/COX7C…	189
GO:0061448	connective tissue development	biological process	152/9065	237/17381	0.000116809	0.00132942	0.000956905	1.22971	MEF2C/WT1/HOXA5/RARG/CYR61/HAND2/SH3PXD2B/SNX19/ZEB1/CHSY1/CHST11/SOX6/FGFR1/RUNX3/HMGA2/MMP13/FGF2/COL1A1/CSF1/EDN1/BMP7/HIF1A/SRF/SOX9/MAPK3/SIRT1/CD44/FGF9/TGFBR2/IFNG/NOTCH1/CTGF/BMPR2/SMAD5/SNAI2/RUNX2/TGFBR1/CDK4/NPPC/TYMS/SULF2/RFLNB/MYCN/HOXC4/HOXA3/NFIB/ARRDC3/SPART/WNT5A/SOX5/TRPM4/OXCT1/GLI2/TRPS1/HAND1/DYRK1B/GNAS/SATB2/FRZB/COL5A1/MEX3C/CTNNB1/TGFB1/XBP1/EVC/BMPR1A/LNPK/PPARGC1A/SMAD…	152
GO:0002446	neutrophil mediated immunity	biological process	301/9065	499/17381	0.000119022	0.00135271	0.000973673	1.15657	S100A9/TLR2/RAB9B/HSPA1A/ROCK1/TOM1/F2/GOLGA7/CTSC/CAND1/ATP6V0A1/ANXA2/ANPEP/PKM/PGM2/CAP1/TUSC2/PNP/PA2G4/PLAU/NFKB1/MAPK1/TIMP2/CD44/RAP1A/CDK13/CPNE3/RHOA/VAPA/DDX3X/RAB5C/HMGB1/DSN1/HSP90AB1/SURF4/PTGES2/VAMP8/COTL1/PDXK/LPCAT1/ARL8A/RAB14/IL6/RAB5B/TOLLIP/RAP2C/CPPED1/PSAP/RAB6A/MS4A3/AGA/ITGB2/METTL7A/SLPI/RAB31/CNN2/ARPC5/FTL/GSTP1/CD63/RAP1B/JUP/CAPN1/PYGB/UNC13D/F2RL1/DYNC1LI1/DPP7/B4GA…	301
GO:0090307	mitotic spindle assembly	biological process	45/9065	59/17381	0.000119177	0.00135271	0.000973673	1.4624	CDC14A/KIF23/CDC14B/HSPA1A/CCSAP/KIF2A/HNRNPU/RHOA/RACGAP1/KIF11/CDC20/RAB11A/FLNA/KIF4A/ZNF207/CHMP2A/SMC3/HSPA1B/KPNB1/SMC1A/PLK1/TUBGCP6/STAG2/TPX2/TPR/AURKB/BIRC5/KIF3B/CHMP2B/CHMP4B/CHEK2/GOLGA2/STAG1/CEP97/MZT1/CLASP1/TUBGCP4/KIFC1/MAP10/VPS4B/CHMP1B/TUBGCP5/ABRAXAS2/MYBL2/NEK2	45
GO:0030832	regulation of actin filament length	biological process	108/9065	162/17381	0.000119652	0.00135447	0.000974937	1.27825	GRB2/TMSB4X/PLEKHG2/PREX1/PRKCE/TWF1/TWF2/PFN1/CXCL12/VASP/CDC42EP4/ABI2/SPIRE1/LIMA1/CAPZB/PPP1R9A/CAPZA1/ARPC5/DMTN/F2RL1/CTTN/CAPG/TMOD3/PLEKHH2/ARF1/CORO1B/MTOR/BAIAP2/FER/SSH2/JMY/MTPN/ARFGEF1/TRIM27/WASHC2C/CIT/CYFIP1/SPTBN1/SPTBN2/CFL1/RDX/SPTAN1/HAX1/WASH3P/PDXP/SPTB/GMFB/CFL2/ICAM1/ACTR2/ARF6/PRKCD/BAG4/CAPZA2/TMOD1/HIP1R/FMN1/BBS4/SEMA5A/PFN4/ALOX15/WDR1/MYADM/CCL11/ACTR3B/WASL/RICTOR/N…	108
GO:0050684	regulation of mRNA processing	biological process	78/9065	112/17381	0.000119654	0.00135447	0.000974937	1.33531	CDK9/HSPA1A/TIA1/PTBP1/DDX5/RBM4/SRSF9/HNRNPU/TRA2B/RBFOX2/SRSF7/BARD1/HNRNPL/RBM8A/SON/PAPOLA/SRSF2/SRSF3/SRSF6/SLTM/YTHDC1/RBM42/SRSF4/SREK1/HNRNPA1/CCNB1/DYRK1A/CPEB3/SNRPA/RBM5/SF3A1/DDX17/NELFE/U2AF2/HSPA8/RNPS1/NCBP2/NPM1/RBM10/SNRNP70/SUPT5H/PABPN1/DAZAP1/PRPF19/IWS1/METTL16/EIF4A3/NSRP1/SAP18/RNF40/C1QBP/TMBIM6/SRPK1/RBMX/RBM15B/HNRNPA2B1/NUP98/JMJD6/HNRNPK/ZFP36L1/FMR1/THRAP3/RNF20/CDC73…	78
GO:0042110	T cell activation	biological process	283/9065	467/17381	0.000120214	0.00135899	0.000978192	1.16192	HES1/MYB/HLA-G/CDC42/FADD/ANXA1/TRAF6/BCL2/CCND3/CDK6/PAK1/SOD1/FOXP1/MAP3K8/MAFB/GRB2/AP3D1/AP3B1/IGF1/ZEB1/PREX1/SDC4/PNP/CSK/HSPD1/VCAM1/CYLD/P2RX7/NFATC2/CD40LG/FAS/IGF2/ERBB2/SRF/SP3/MSN/IGFBP2/PIK3CG/TGFBR2/IFNG/STAT3/AKT1/RUNX2/CD46/CEBPB/ZFP36L2/BAX/FANCA/HMGB1/LEF1/PRNP/TNFRSF21/NLRP3/RAC2/FANCD2/SOX4/IL6/STK11/CBFB/YES1/BCL11B/KIT/NKAP/RSAD2/CCR9/CD80/PRELID1/FLOT2/DTX1/LGALS1/F2RL1/KDE…	283
GO:2000147	positive regulation of cell motility	biological process	279/9065	460/17381	0.000123047	0.00138915	0.000999899	1.16293	DRD1/NTRK3/MET/ACVR1/AKT2/FADD/HDAC4/BCL2/JUN/PAK1/SOD2/FOXP1/RHOB/THBS1/NRP1/EGFR/CYR61/IGF1/TMSB4X/EPB41L4B/SHTN1/PREX1/LAMC2/CRK/TAC1/FGFR1/VEGFA/PRKCE/ETS1/APP/FN1/FGF2/PTK2/PRKD2/IL1R1/COL1A1/CXCL8/PLAU/IGF1R/CSF1/EDN1/HRAS/BMP7/HIF1A/FGF7/SOX9/MAPK3/PDGFRA/SERPINE1/MAPK1/FLT1/KDR/ILK/PTGS2/PODXL/SLC8A1/TGFBR2/TEK/IFNG/NOTCH1/MAPRE1/NTF3/CPNE3/BMPR2/AKT1/PFN1/SNAI2/MDM2/ADAM9/PDPN/LPAR1/RHOA…	279
GO:0048024	regulation of mRNA splicing, via spliceosome	biological process	57/9065	78/17381	0.000124342	0.00139806	0.00100631	1.40116	TIA1/PTBP1/DDX5/RBM4/SRSF9/HNRNPU/TRA2B/RBFOX2/SRSF7/HNRNPL/RBM8A/SON/SRSF2/SRSF3/SRSF6/YTHDC1/RBM42/SRSF4/SREK1/HNRNPA1/DYRK1A/RBM5/SF3A1/DDX17/U2AF2/HSPA8/RNPS1/NPM1/RBM10/SNRNP70/DAZAP1/PRPF19/METTL16/EIF4A3/NSRP1/SAP18/C1QBP/SRPK1/RBMX/RBM15B/HNRNPA2B1/NUP98/JMJD6/HNRNPK/FMR1/THRAP3/SRRM4/SMU1/HMX2/WTAP/SRSF10/RBM7/MBNL2/RBM25/SRPK2/CELF4/SNW1	57
GO:2000177	regulation of neural precursor cell proliferation	biological process	57/9065	78/17381	0.000124342	0.00139806	0.00100631	1.40116	WNT3A/FOXO3/FOXO1/PTBP2/PITX3/VEGFA/NF1/HIF1A/ILK/NOTCH1/PAX6/LRRK2/SHCBP1/ASPM/NF2/WNT5A/GNG5/FLNA/GLI2/KDM2B/CDH2/SETD1A/KCTD11/CTNNB1/TGFB1/CTNNA1/RAPGEF1/SMO/LRP2/PTPRZ1/GLI1/BTG2/TRIM71/FOXG1/ID2/SMARCD3/GLI3/LYN/EMX1/DISC1/EGF/SIX3/LIMS2/FZD9/NR2E1/SHH/SPINT2/ASCL1/VEGFC/SLC6A4/CDON/PROX1/LHX5/DLL4/ADGRG1/GATA2/GPR37L1	57
GO:0002758	innate immune response-activating signal transduction	biological process	179/9065	284/17381	0.000125064	0.00139806	0.00100631	1.20849	S100A9/IRAK2/KRAS/TLR2/FADD/ESR1/TRAF6/IRAK1/HSPA1A/PAK1/WDFY1/UNC93B1/EP300/PRKCE/IKBKB/HSP90B1/HSPD1/CYLD/NFKB1/RPS6KA5/CREBBP/CHUK/HRAS/MUC4/TLR4/IKBKE/XIAP/NFKBIA/TBK1/HMGB1/S100A14/BTRC/PSMD9/ERBIN/IRF7/ITGB2/RSAD2/F2RL1/NOP53/PTPN22/DDX60/PSME1/ANKRD17/RIPK2/SRC/LGR4/CAV1/SEC14L1/LSM14A/UBA52/PSMD3/UBB/PSMB2/PDPK1/PRKACA/HSPA1B/UBE2N/PSMD4/PSMD11/SKP1/PSMC1/PSMB3/PSMA7/PSMC5/TICAM1/PAK2/MAP…	179
GO:0000083	regulation of transcription involved in G1/S transition of mitotic cell cycle	biological process	25/9065	29/17381	0.000125329	0.00139806	0.00100631	1.65291	E2F1/CCNE1/E2F6/BACH1/RB1/RRM2/POLA1/DHFRP1/TYMS/CDC6/FBXO5/PCNA/CDT1/KLF11/BRD4/CDC45/ORC1/E2F4/TFDP1/TFDP2/ID2/NPAT/E2F7/HINFP/ESRRB	25
GO:0003203	endocardial cushion morphogenesis	biological process	25/9065	29/17381	0.000125329	0.00139806	0.00100631	1.65291	ACVR1/BMP7/SMAD4/SOX9/TGFBR2/NOTCH1/SNAI2/MDM2/TGFBR1/TBX2/BMPR1A/RBPJ/NOG/SNAI1/TBX20/TWIST1/HEYL/BMP2/ENG/TMEM100/MSX2/TGFB2/ACVRL1/HEY1/MSX1	25
GO:0030866	cortical actin cytoskeleton organization	biological process	25/9065	29/17381	0.000125329	0.00139806	0.00100631	1.65291	KIF23/PDCD6IP/ROCK1/IKBKB/EHD2/EPB41L3/RACGAP1/CALR/PLS1/FMNL2/EPB41L2/LLGL1/EPB41/TLN1/STRIP1/EZR/TNF/ROCK2/ARF6/RHOQ/RAB13/PLEK/EPB41L1/NCKAP1L/DLG1	25
GO:1900739	regulation of protein insertion into mitochondrial membrane involved in apoptotic signaling pathway	biological process	25/9065	29/17381	0.000125329	0.00139806	0.00100631	1.65291	E2F1/BCL2/YWHAQ/TP53/BCL2L11/TP73/YWHAZ/PMAIP1/MAPK8/DYNLL2/YWHAH/SFN/NMT1/PPP3R1/PPP1R13B/YWHAE/YWHAB/TFDP1/YWHAG/TFDP2/BMF/DYNLL1/BID/TP63/CASP8	25
GO:1900740	positive regulation of protein insertion into mitochondrial membrane involved in apoptotic signaling pathway	biological process	25/9065	29/17381	0.000125329	0.00139806	0.00100631	1.65291	E2F1/BCL2/YWHAQ/TP53/BCL2L11/TP73/YWHAZ/PMAIP1/MAPK8/DYNLL2/YWHAH/SFN/NMT1/PPP3R1/PPP1R13B/YWHAE/YWHAB/TFDP1/YWHAG/TFDP2/BMF/DYNLL1/BID/TP63/CASP8	25
GO:0046854	phosphatidylinositol phosphorylation	biological process	70/9065	99/17381	0.00012533	0.00139806	0.00100631	1.35572	MET/GRB2/EGFR/FGF20/FGFR1/ERBB3/IP6K2/PIK3R2/FGF2/IRS1/ERBB2/ERBB4/FGF7/PDGFRA/FGF9/PIK3CG/PIP4K2C/PIP4K2B/FRS2/KIT/CD80/FGFR2/BTC/EFR3A/PIKFYVE/IP6K1/PIP5K1A/PTPN11/SMG1/GAB1/PIP5K1C/PIP4K2A/PI4KB/IMPA1/PIK3C2A/PIK3CD/KL/PIK3CA/ZFYVE21/PI4K2B/PIK3R1/EREG/FYN/NRG4/FGFR4/EGF/PIK3C2B/PDGFB/PIK3C3/FGF5/FAM126A/IMPAD1/KLB/NRG2/PDGFA/BPNT1/CD86/FGF19/IMPA2/PI4K2A/HBEGF/CD28/TRAT1/KITLG/IRS2/FGF1/PIK3A…	70
GO:1903203	regulation of oxidative stress-induced neuron death	biological process	20/9065	22/17381	0.000128999	0.00143329	0.00103167	1.74307	MCL1/FBXW7/HIF1A/TLR4/NR4A3/ATG7/RACK1/NONO/CTNNB1/PARK7/PARP1/TSC1/ATF4/WNT1/OXR1/PRKN/NCOA7/FZD1/TLDC1/TLR6	20
GO:1904886	beta-catenin destruction complex disassembly	biological process	20/9065	22/17381	0.000128999	0.00143329	0.00103167	1.74307	WNT3A/DVL2/CSNK1A1/CAV1/AXIN1/PPP1CA/DVL1/CTNNB1/FRAT1/APC/FRAT2/WNT1/GSK3B/LRP6/FZD5/AMER1/DVL3/FZD1/FZD2/WNT8B	20
GO:2000679	positive regulation of transcription regulatory region DNA binding	biological process	20/9065	22/17381	0.000128999	0.00143329	0.00103167	1.74307	WNT3A/TRAF6/HAND2/IGF1/KLF4/HMGA2/RB1/IFNG/KAT2A/GATA3/CTNNB1/TGFB1/PARK7/FOXC1/PARP1/TWIST1/GTF2B/TRIM6/POU4F1/NEUROD1	20
GO:0019362	pyridine nucleotide metabolic process	biological process	112/9065	169/17381	0.000131041	0.00145214	0.00104524	1.27069	HDAC4/TPI1/GPD2/ADPGK/PKM/IGF1/POM121/PGM2/G6PD/PNP/P2RX7/PPARA/HIF1A/HK2/PTGS2/STAT3/NDC1/TP53I3/NUP58/PARP16/PRKAA1/NUP62/PGD/NUP50/POM121C/PRKAG1/NUP160/NUP210/NT5E/TKT/LDHA/GPI/DCXR/NUP153/ENO1/PFKP/GAPDH/OGDHL/PDHA1/RANBP2/PPARGC1A/PARP10/PGAM1/ALDOA/PFKFB4/PDHX/TIGAR/MDH2/NUP214/AAAS/NUP37/MPC1/BPGM/TALDO1/TPR/NUPL2/MDH1/PRKAA2/HK1/LDHB/VCP/NUP98/IDH2/NUP43/PDHB/RPE/CD38/DDIT4/OGT/PGK1/H6PD…	112
GO:0046496	nicotinamide nucleotide metabolic process	biological process	112/9065	169/17381	0.000131041	0.00145214	0.00104524	1.27069	HDAC4/TPI1/GPD2/ADPGK/PKM/IGF1/POM121/PGM2/G6PD/PNP/P2RX7/PPARA/HIF1A/HK2/PTGS2/STAT3/NDC1/TP53I3/NUP58/PARP16/PRKAA1/NUP62/PGD/NUP50/POM121C/PRKAG1/NUP160/NUP210/NT5E/TKT/LDHA/GPI/DCXR/NUP153/ENO1/PFKP/GAPDH/OGDHL/PDHA1/RANBP2/PPARGC1A/PARP10/PGAM1/ALDOA/PFKFB4/PDHX/TIGAR/MDH2/NUP214/AAAS/NUP37/MPC1/BPGM/TALDO1/TPR/NUPL2/MDH1/PRKAA2/HK1/LDHB/VCP/NUP98/IDH2/NUP43/PDHB/RPE/CD38/DDIT4/OGT/PGK1/H6PD…	112
GO:0098781	ncRNA transcription	biological process	73/9065	104/17381	0.000131791	0.00145853	0.00104984	1.34585	CDK9/POLR2K/TAF9/POLR2D/RPRD1B/INTS14/GTF3C6/INTS6/NIFK/NOP53/SMARCB1/POLR2I/RPRD2/SRRT/CCNT2/SP1/GTF3C1/MTOR/POLR2A/POLR2L/DDX11/INTS3/NCL/SNAPC4/INTS4/POLR2B/INTS10/SMARCA4/NCBP2/SPIN1/NABP2/POLR2C/MARS/INTS5/GTF2A1/POU2F1/GTF3C4/CAVIN1/POLR2F/POLR1B/ZC3H8/CCNK/NABP1/TAF8/TAF11/IPPK/TAF1B/GTF2F1/TAF13/PHAX/ELL2/CCNT1/NPM3/RRN3/INTS2/RPAP2/POU2F2/NOL11/POLR2E/GTF2B/GTF2E2/GTF2E1/TAF6/ANG/SNAPC3/…	73
GO:0006110	regulation of glycolytic process	biological process	50/9065	67/17381	0.000133353	0.00147195	0.0010595	1.43088	HDAC4/IGF1/POM121/P2RX7/PPARA/HIF1A/STAT3/NDC1/NUP58/PRKAA1/NUP62/NUP50/POM121C/PRKAG1/NUP160/NUP210/NUP153/RANBP2/PPARGC1A/PGAM1/PFKFB4/TIGAR/NUP214/AAAS/NUP37/TPR/NUPL2/PRKAA2/NUP98/NUP43/DDIT4/OGT/PFKFB2/INS/NUP205/NUP155/SEH1L/NUP54/INSR/EIF6/NUP93/ESRRB/ENTPD5/NUP188/MLXIPL/NUP85/CBFA2T3/NUP35/GCK/PFKFB3	50
GO:0006695	cholesterol biosynthetic process	biological process	50/9065	67/17381	0.000133353	0.00147195	0.0010595	1.43088	SOD1/G6PD/CES1/NFYB/CFTR/NSDHL/IDI1/TM7SF2/HMGCR/PRKAA1/LBR/RAN/HMGCS1/NFYA/SP1/ACLY/FDFT1/SREBF1/CYB5R3/KPNB1/FASN/SCD/ACACA/INSIG1/MBTPS1/EBP/SREBF2/CNBP/ACAA2/GGPS1/PRKAA2/ERLIN1/LSS/DHCR7/APOE/SC5D/MSMO1/SQLE/PLPP6/CYP51A1/INSIG2/GPAM/ELOVL6/DHCR24/MVK/APOB/ACACB/FGF1/MBTPS2/APOA1	50
GO:0006353	DNA-templated transcription, termination	biological process	76/9065	109/17381	0.000137013	0.00150839	0.00108573	1.33688	GTF2H1/POLR2K/SRSF11/CPSF1/PRMT5/SRSF9/SRSF1/SRSF7/DDX39A/RBM8A/WDR33/PAPOLA/SRSF2/SRSF3/SRSF6/SRRM1/SYMPK/CPSF3/SLBP/SRSF4/ZC3H11A/UBTF/CSTF3/SRSF5/XRN2/POLR2A/POLR2L/U2AF2/MED18/RNPS1/NCBP2/PABPN1/SNRPD3/CASC3/MAZ/SNRPB/CHTOP/EIF4A3/GTF2H2/POLDIP3/CAVIN1/POLR2F/POLR1B/SMN2/CPSF2/THOC5/ERCC3/THOC1/PCF11/SMN1/DDX39B/ZNF473/CSTF2/CSTF1/POLR1D/SETX/GTF2H5/TAF1B/NUDT21/SSU72/TTF2/TWISTNB/TAF1D/CPSF7…	76
GO:0048593	camera-type eye morphogenesis	biological process	76/9065	109/17381	0.000137013	0.00150839	0.00108573	1.33688	ARID1A/ZEB1/PITX3/VEGFA/HMGN1/JAG1/NF1/BMP7/HIF1A/SOX9/SP3/PAX6/FOXF2/BAX/EPHA2/WNT5A/FRS2/C12orf57/MFN2/GNAT2/KDM2B/FOXN4/THY1/TSPAN12/HIPK2/SKI/CTNNB1/TBX2/FJX1/YY1/TENM3/TSKU/HIPK1/PTPRM/SOX11/NECTIN1/TH/WNT2B/LRP6/WNT2/GLI3/PROX2/IHH/FZD5/NECTIN3/CABP4/RDH13/SDK1/EGF/COL8A1/TWIST1/TFAP2A/EPHB2/SIX3/TFAP2B/PAX2/BAK1/GDF11/AHI1/VHLL/PITX2/MAN2A1/PROM1/WNT16/WNT9A/RORB/CDON/RS1/PHACTR4/ALDH1A3/P…	76
GO:2001242	regulation of intrinsic apoptotic signaling pathway	biological process	106/9065	159/17381	0.000137712	0.00151411	0.00108985	1.27825	S100A9/BCL2/HSPA1A/MCL1/SOD1/SOD2/BCL2L2/MAPK7/FBXW7/CYLD/TP53/SIAH1/HIF1A/SIRT1/BCL2L11/PTGS2/CD44/PMAIP1/AKT1/LRRK2/SNAI2/MDM2/CXCL12/TAF9/DDX3X/BAX/HYOU1/NACC2/SERINC3/SGMS1/ZNF385A/BAG5/NOC2L/PTPN1/SRC/RAD9A/CAV1/UBB/CCAR2/ARHGEF2/RACK1/BCL2L12/NONO/HTRA2/MIF/ERP29/ENO1/XBP1/BCLAF1/URI1/TPT1/GPX1/SFPQ/PARK7/PARP1/RPS3/DNAJA1/YBX3/RPL26/TAF9B/HSPH1/TRAP1/UBQLN1/CDKN2D/PLEKHF1/BOK/RPS7/TMBIM6/G…	106
GO:0046486	glycerolipid metabolic process	biological process	268/9065	441/17381	0.000137973	0.00151501	0.00109049	1.16521	MET/GRB2/EGFR/FGF20/ARF3/INPP5F/ATM/FGFR1/INPPL1/ERBB3/MTMR12/SLC44A1/CPNE6/FBXW7/IP6K2/PIK3R2/MECP2/FGF2/IRS1/CPT1A/PTPN13/ERBB2/ERBB4/FABP4/FGF7/PDGFRA/SIRT1/FGF9/PIK3CG/CPNE3/RAB5A/LDLR/CSNK2A1/FABP3/AGPAT3/STARD7/PIP4K2C/AGPAT1/HADHB/LPCAT1/RAB14/LPGAT1/SERINC3/MTMR4/MTMR9/VAC14/PIP4K2B/PIGG/FRS2/KIT/CD80/PLEKHA3/DGKH/FGFR2/LIPC/ABHD12/PTPMT1/BTC/OSBPL10/PIGT/GPAT4/RGN/EFR3A/PIGS/ETNK1/CTDNEP…	268
GO:0008625	extrinsic apoptotic signaling pathway via death domain receptors	biological process	60/9065	83/17381	0.000138773	0.00152181	0.00109539	1.38605	FADD/BCL2/THBS1/BRCA1/TIMP3/FAF1/PEA15/HMOX1/NF1/FAS/SERPINE1/PMAIP1/DDX3X/BAX/TMC8/ARHGEF2/LGALS3/CASP8AP2/GPX1/PARK7/TMBIM1/PTEN/TNFRSF10B/ATF3/FEM1B/RAF1/BCL2L1/SFRP1/STK3/RFFL/ICAM1/TNF/STK4/DAB2IP/SP100/SKIL/PIK3R1/MADD/TNFAIP3/GABARAP/BEX3/BLOC1S2/TRAF2/DIABLO/MOAP1/CRADD/FGB/DAPK1/TNFRSF10A/HMGB2/FASLG/FAIM2/BID/STX4/CASP8/RNF34/SORT1/NOS3/BAG3/TNFSF10	60
GO:0033143	regulation of intracellular steroid hormone receptor signaling pathway	biological process	55/9065	75/17381	0.000139309	0.00152569	0.00109818	1.40607	ESR1/PAK1/FOXP1/BRCA1/DDX5/MED1/EP300/UBE2I/CLOCK/SIRT1/HDAC1/KANK2/CRY2/KMT2D/CBFB/RNF6/CALR/SRC/AXIN1/WBP2/PAGR1/CNOT1/SMARCA4/PARK7/CNOT9/PARP1/PHB2/SFRP1/NODAL/AR/YAP1/CARM1/UFL1/HEYL/GPAM/ARRB2/PER1/ARNTL/UBA5/CNOT2/ZNF366/FOXH1/RUNX1/CYP7B1/UFM1/DAB2/RWDD1/STRN3/RNF14/LATS1/TP63/TAF1/KCTD6/PIAS2/FOXA1	55
GO:0035635	entry of bacterium into host cell	biological process	17/9065	18/17381	0.000141869	0.0015497	0.00111547	1.81085	MET/GRB2/CXCL8/CDH1/EXOC2/SRC/ITGAV/CAV1/UBA52/UBB/CTNNB1/CTNND1/UBC/EXOC7/CBL/RPS27A/CBLL1	17
GO:0046112	nucleobase biosynthetic process	biological process	17/9065	18/17381	0.000141869	0.0015497	0.00111547	1.81085	PRPS1/UMPS/SHMT1/HPRT1/MTHFD1/CAD/MTHFD1L/GART/MTOR/APRT/CMPK1/ADA/DHODH/GMPS/PAICS/CPS1/ADA2	17
GO:0001893	maternal placenta development	biological process	27/9065	32/17381	0.000142526	0.00155487	0.00111918	1.61778	GJA1/LIF/JUNB/PTGS2/BMPR2/AKT1/PRDX3/GJB2/TMED2/SPP1/ASH1L/DAZAP1/PPARD/STOX2/NODAL/RXRA/PRDM1/STC2/MEN1/CTSV/NR2F2/LDOC1/CTSB/PTGIS/CYP27B1/VDR/BSG	27
GO:0007034	vacuolar transport	biological process	82/9065	119/17381	0.000143965	0.00156853	0.00112902	1.32122	CDX2/RHOB/GAK/AP3D1/AP3B1/FGFR1/HGS/SNAPIN/LRRK2/ANKFY1/TSG101/RAB12/AP1G1/HMGXB4/VPS53/HOOK1/CHMP2A/VAMP7/ARF1/FAM160A2/NDFIP2/MGRN1/VPS4A/HSPA8/LARS/LYST/TRAK2/GCC2/SMURF1/TRAK1/VPS18/RAB7A/VPS11/WASH3P/VPS35/NCOA4/SCARB2/NAGPA/UBXN6/HOOK3/VPS51/AP3M1/VPS41/NDFIP1/VCP/SNF8/LEPROT/LEPROTL1/CHMP2B/M6PR/CHMP4B/SNX16/BECN1/VPS36/TMEM106B/EHD3/VPS39/PCSK9/DTX3L/VPS33A/KIF13A/VPS52/ATP6V0D1/ATG14/PRK…	82
GO:0045840	positive regulation of mitotic nuclear division	biological process	39/9065	50/17381	0.000145757	0.00158389	0.00114007	1.49555	IGF1/HNRNPU/EDN1/IGF2/RB1/UBE2C/CDCA5/CDT1/ESPL1/NUP62/BTC/PHIP/TGFB1/RANBP3/RANBP2/PHB2/AURKA/RGPD4/EREG/BECN1/INS/TGFA/CUL3/EGF/SMC5/PDGFB/EDN3/INSR/EPGN/SH2B1/DLGAP5/RANBP1/SLF1/NSMCE2/CD28/IL1A/IL1B/NEUROG1/NUMA1	39
GO:0072073	kidney epithelium development	biological process	94/9065	139/17381	0.000146212	0.00158389	0.00114007	1.29664	MEF2C/HES1/BCL2/WT1/SDC4/FGFR1/VEGFA/FGF2/HOXB7/LIF/WNK4/WNT9B/JAG1/BMP7/SMAD4/SOX9/PTCH1/MTSS1/ILK/PODXL/NOTCH1/SDC1/SMAD5/SMAD2/BASP1/SIX1/WWTR1/EPHA4/SIX4/STAT1/FGFR2/KLHL3/GATA3/LGR4/EPHA7/MYC/MAGED1/SALL1/HOXD11/CTNNBIP1/CTNNB1/TGFB1/ROBO2/FOXC1/SMAD3/IQGAP1/SPRY1/EFNB2/SMO/ACAT1/SFRP1/SMAD1/WNT1/RARB/SMAD6/NOG/WNT2B/SMAD7/RET/GLI3/OSR1/PKD1/FMN1/GREM1/PAX8/WNT7B/RARA/HEYL/BMP2/TFAP2B/PAX2/P…	94
GO:0007006	mitochondrial membrane organization	biological process	88/9065	129/17381	0.000146789	0.00158389	0.00114007	1.30798	E2F1/BCL2/HSPA1A/OMA1/RHOT1/YWHAQ/HSPA4/TP53/HK2/BCL2L11/TP73/STAT3/YWHAZ/PMAIP1/MAPK8/BAX/LETM1/TIMM50/ATP5B/DYNLL2/YWHAH/MFN2/SFN/TMEM14A/HSP90AA1/RHOT2/ATP5G3/NMT1/ATP5S/GSK3A/PPP3R1/PPP1R13B/SLC25A6/YWHAE/SLC25A5/SLC25A4/DNAJC11/RTL10/CNP/ATPIF1/TOMM20/ATP5J/SLC9A1/BOK/YWHAB/PDCD5/ACAA2/ATP5O/ATF2/BCL2L1/ATP5E/GSK3B/PPIF/TFDP1/MFN1/YWHAG/TFDP2/SLC35F6/BMF/HIP1R/CAMK2A/MUL1/BLOC1S2/ATP5A1/DYNL…	88
GO:0048284	organelle fusion	biological process	123/9065	188/17381	0.000146798	0.00158389	0.00114007	1.25445	AKT2/ANXA1/OMA1/ANXA2/RABGAP1L/USO1/SNAPIN/UVRAG/BAX/VAV3/CDK1/TBC1D1/VAMP8/RAB34/ANKFY1/SYT12/BCL2A1/SAMD9L/KIF5B/CALR/SYTL2/TRIM9/MFN2/GNAI3/TBC1D9/VAMP7/SYT9/SGSM1/TMEM175/BET1/TAPBP/STX16/VPS4A/TBC1D10B/TBC1D22A/SYT4/RABGAP1/STX7/TBC1D9B/GOSR1/VCPIP1/ANKRD27/VPS18/RAB7A/VPS11/C2CD5/GRIK5/EVI5/SYT11/VPS41/MIGA2/USP6NL/VAMP3/MFN1/CHMP2B/TBC1D13/EVI5L/SEC22C/VAMP2/USP6/VAT1/VAMP1/TBC1D5/SYT13/SN…	123
GO:0030260	entry into host cell	biological process	91/9065	134/17381	0.000146879	0.00158389	0.00114007	1.3021	CXCR4/MET/HSPA1A/GRB2/EGFR/ANPEP/AXL/CXCL8/UVRAG/NCAM1/IFITM1/LDLR/CD46/SLC1A5/EPHA2/CDK1/CDH1/VAMP8/TRIM59/IFITM3/CD80/LGALS1/TRIM26/EXOC2/PPIA/F11R/SRC/ITGAV/ITGB1/CAV1/SCARB1/XPR1/UBA52/UBB/NUP153/HSPA1B/CTNNB1/CTNND1/ITCH/UBC/VPS18/CDHR3/EFNB2/EXOC7/CXADR/SCARB2/CLDN9/CD81/ITGA5/ICAM1/CBL/SIVA1/TFRC/GRK2/TRIM8/ITGA2/NECTIN1/MOG/HAVCR1/CD55/ZNF639/RPS27A/CD4/WWP2/TRIM25/CLDN1/TRIM31/CTSB/GYPA/…	91
GO:0044409	entry into host	biological process	91/9065	134/17381	0.000146879	0.00158389	0.00114007	1.3021	CXCR4/MET/HSPA1A/GRB2/EGFR/ANPEP/AXL/CXCL8/UVRAG/NCAM1/IFITM1/LDLR/CD46/SLC1A5/EPHA2/CDK1/CDH1/VAMP8/TRIM59/IFITM3/CD80/LGALS1/TRIM26/EXOC2/PPIA/F11R/SRC/ITGAV/ITGB1/CAV1/SCARB1/XPR1/UBA52/UBB/NUP153/HSPA1B/CTNNB1/CTNND1/ITCH/UBC/VPS18/CDHR3/EFNB2/EXOC7/CXADR/SCARB2/CLDN9/CD81/ITGA5/ICAM1/CBL/SIVA1/TFRC/GRK2/TRIM8/ITGA2/NECTIN1/MOG/HAVCR1/CD55/ZNF639/RPS27A/CD4/WWP2/TRIM25/CLDN1/TRIM31/CTSB/GYPA/…	91
GO:0051806	entry into cell of other organism involved in symbiotic interaction	biological process	91/9065	134/17381	0.000146879	0.00158389	0.00114007	1.3021	CXCR4/MET/HSPA1A/GRB2/EGFR/ANPEP/AXL/CXCL8/UVRAG/NCAM1/IFITM1/LDLR/CD46/SLC1A5/EPHA2/CDK1/CDH1/VAMP8/TRIM59/IFITM3/CD80/LGALS1/TRIM26/EXOC2/PPIA/F11R/SRC/ITGAV/ITGB1/CAV1/SCARB1/XPR1/UBA52/UBB/NUP153/HSPA1B/CTNNB1/CTNND1/ITCH/UBC/VPS18/CDHR3/EFNB2/EXOC7/CXADR/SCARB2/CLDN9/CD81/ITGA5/ICAM1/CBL/SIVA1/TFRC/GRK2/TRIM8/ITGA2/NECTIN1/MOG/HAVCR1/CD55/ZNF639/RPS27A/CD4/WWP2/TRIM25/CLDN1/TRIM31/CTSB/GYPA/…	91
GO:0051828	entry into other organism involved in symbiotic interaction	biological process	91/9065	134/17381	0.000146879	0.00158389	0.00114007	1.3021	CXCR4/MET/HSPA1A/GRB2/EGFR/ANPEP/AXL/CXCL8/UVRAG/NCAM1/IFITM1/LDLR/CD46/SLC1A5/EPHA2/CDK1/CDH1/VAMP8/TRIM59/IFITM3/CD80/LGALS1/TRIM26/EXOC2/PPIA/F11R/SRC/ITGAV/ITGB1/CAV1/SCARB1/XPR1/UBA52/UBB/NUP153/HSPA1B/CTNNB1/CTNND1/ITCH/UBC/VPS18/CDHR3/EFNB2/EXOC7/CXADR/SCARB2/CLDN9/CD81/ITGA5/ICAM1/CBL/SIVA1/TFRC/GRK2/TRIM8/ITGA2/NECTIN1/MOG/HAVCR1/CD55/ZNF639/RPS27A/CD4/WWP2/TRIM25/CLDN1/TRIM31/CTSB/GYPA/…	91
GO:0090316	positive regulation of intracellular protein transport	biological process	166/9065	262/17381	0.000147283	0.00158621	0.00114174	1.21483	HES1/WNT3A/CDC42/AKT2/TLR2/BAP1/PPM1A/PAK1/F2/EGFR/ANP32B/IGF1/HPS4/MED1/FBXW7/PIK3R2/APP/TP53/ERBB2/ERBB4/SMAD4/MAPK1/TLR4/PTGS2/IFNG/LRRK2/MDM2/RHOA/TGFBR1/PCNT/STARD7/HHAT/ECT2/HSP90AB1/PRNP/FAM20B/CDK1/CDH1/SULF2/RAC2/IL6/NKAP/JUP/KIF5B/EMD/KAT2A/FLNA/PDCD10/UBR5/CCL2/SFN/CSNK2A2/MIEF1/RAB29/WDR46/BAMBI/PRKACA/HTRA2/TRIM28/GSK3A/TGFB1/BMPR1A/U2AF2/USP36/RIPOR1/MYBPC1/HUWE1/YWHAE/PARP1/NUTF2/S…	166
GO:1904029	regulation of cyclin-dependent protein kinase activity	biological process	63/9065	88/17381	0.000151593	0.00162878	0.00117239	1.37267	CDC25A/CCND2/CEBPA/CCND1/CDKN1A/GTF2H1/CCND3/CCNE2/EGFR/CCNL1/CDKN1C/CDKN1B/CDKN3/CDKN2A/AKT1/GADD45A/PSRC1/PKMYT1/CDC6/CDC37/BLM/HHEX/MAPRE3/MYOCD/HERC5/SFN/CCNB1/SRC/CCNT2/CCNY/GTPBP4/PLK1/CCNQ/PTEN/HEXIM1/CDKN2D/APC/CKS1B/CCNG1/CASP3/CCNYL1/CCNK/KAT2B/CDK5R1/CNPPD1/CAMK2N1/PKD1/TNFAIP3/MEN1/NR2F2/LATS2/CKS2/CCNT1/PDGFB/ADAM17/CCNL2/TFAP4/HSPA2/LATS1/WEE2/PROX1/CDKN2B/SERTAD1	63
GO:0006644	phospholipid metabolic process	biological process	279/9065	461/17381	0.000151623	0.00162878	0.00117239	1.16041	MET/GATA6/CDC42/GRB2/EGFR/FGF20/ARF3/INPP5F/ATM/KLF4/FGFR1/INPPL1/ERBB3/MTMR12/SLC44A1/CPNE6/IP6K2/PIK3R2/MECP2/FGF2/PTK2/ISYNA1/IRS1/PTPN13/ERBB2/ERBB4/CCKBR/FGF7/PDGFRA/FLT1/FGF9/PIK3CG/TEK/FLT3/CPNE3/RAB5A/LDLR/CSNK2A1/FABP3/AGPAT3/VAV3/STARD7/PIP4K2C/IDI1/AGPAT1/HADHB/LPCAT1/RAB14/LPGAT1/SERINC3/SGMS1/MTMR4/MTMR9/VAC14/PIP4K2B/PIGG/FRS2/KIT/CD80/PLEKHA3/DGKH/FGFR2/LIPC/ABHD12/PTPMT1/BTC/OSBPL…	279
GO:0002067	glandular epithelial cell differentiation	biological process	37/9065	47/17381	0.000152749	0.0016367	0.00117809	1.50942	HES1/GATA6/CDK6/HOXA5/RARG/AGR2/CLOCK/NOTCH1/PAX6/WNT5A/FGFR2/GPAT4/RHEB/PDPK1/GSK3A/SMO/RFX3/NKX6-1/GSK3B/RXRA/RARB/SIDT2/WDR77/MEN1/NKX2-2/RARA/BMP2/ARNTL/VHLL/ASCL1/WNT4/TP63/PROX1/DLL1/IL31RA/FOXA1/NEUROD1	37
GO:2000677	regulation of transcription regulatory region DNA binding	biological process	37/9065	47/17381	0.000152749	0.0016367	0.00117809	1.50942	WNT3A/TRAF6/HAND2/IGF1/TMSB4X/KLF4/HMGA2/LIF/PPARA/RB1/IFNG/SIN3A/KAT2A/SRI/GATA3/HAND1/CTNNB1/TGFB1/PARK7/FOXC1/PARP1/NSD1/SOX11/DOT1L/HEY2/TWIST1/DDIT3/ZNF675/GTF2B/MSX2/PER2/TAF1/HEY1/TRIM6/MSX1/POU4F1/NEUROD1	37
GO:0051031	tRNA transport	biological process	29/9065	35/17381	0.000153581	0.00164144	0.0011815	1.58868	POM121/NDC1/NUP58/RAN/NUP62/NUP50/POM121C/NUP160/NUP210/XPOT/NUP153/RANBP2/NUP214/AAAS/NUP37/NOL6/TOMM20/TPR/NUPL2/NUP98/NUP43/NUP205/NUP155/SEH1L/NUP54/NUP93/NUP188/NUP85/NUP35	29
GO:0097421	liver regeneration	biological process	29/9065	35/17381	0.000153581	0.00164144	0.0011815	1.58868	UCP2/CCND1/EGFR/EZH2/PRMT5/HMOX1/PTCH1/SRSF1/NFKBIA/RAP1A/CSNK2A1/CEBPB/TYMS/SULF2/PCNA/RGN/SRSF5/CSNK2A2/TGFB1/AURKA/RPL32/GLI1/HFE/GLI3/IHH/CLDN1/RPS16/PTPN3/PNPT1	29
GO:0031100	animal organ regeneration	biological process	58/9065	80/17381	0.000156537	0.00167092	0.00120272	1.3901	UCP2/CCND1/CDKN1A/EGFR/PKM/PRPS1/AXL/MED1/EZH2/CCNA2/PRMT5/HMOX1/PPARG/PTCH1/SRSF1/NFKBIA/TGFBR2/NOTCH1/RAP1A/FLT3/CSNK2A1/CXCL12/CEBPB/CDK4/TGFBR3/CDK1/TYMS/SULF2/PCNA/GSTP1/MKI67/RGN/LCP1/SRSF5/CCL2/CSNK2A2/NR4A3/TGFB1/AURKA/RPL32/WNT1/GLI1/HFE/ADM/GLI3/IGF2R/IHH/ATIC/BAK1/CLDN1/BAAT/RPS16/PTPN3/PNPT1/NNMT/FPGS/APOA1/LPIN1	58
GO:0048017	inositol lipid-mediated signaling	biological process	104/9065	156/17381	0.000158514	0.00168988	0.00121637	1.27825	F2/EGFR/IGF1/INPP5F/KLF4/FGFR1/ERBB3/PIK3R2/PTK2/IER3/IRS1/IGF1R/EDN1/NF1/PTPN13/ERBB2/ERBB4/SOX9/MAPK3/PDGFRA/SIRT1/MAPK1/NTRK2/FLT1/KDR/PIK3CG/TEK/FLT3/AKT1/RHOA/PIP4K2C/PIP4K2B/KIT/F2RL1/NOP53/NCS1/GATA3/SEMA4D/PRR5/TSC2/PIP5K1A/UNC5B/PIP5K1C/PTEN/PIP4K2A/FBXL2/PPARD/HAX1/PI4KB/C1QBP/SERPINE2/EZR/SERPINA12/PIK3C2A/PIK3CD/IL18/CBL/PIK3CA/PLEKHA1/ZFP36L1/RPS6KB1/STAMBP/OGT/DAB2IP/F2R/PPP2R5C/PIK…	104
GO:0061014	positive regulation of mRNA catabolic process	biological process	31/9065	38/17381	0.000159192	0.00169282	0.00121848	1.56417	HNRNPD/ZFP36L2/YTHDF2/CPEB3/TNRC6B/MEX3D/CNOT1/NANOS1/PABPC1/GIGYF2/HNRNPR/CNOT8/PUM1/QKI/GTPBP1/KHSRP/CNOT6L/AGO2/BTG2/ZFP36L1/TOB1/TNRC6C/TRIM71/UPF1/PRR5L/METTL14/RC3H1/ZC3HAV1/PNPT1/ZFP36/ZC3H12D	31
GO:0071364	cellular response to epidermal growth factor stimulus	biological process	31/9065	38/17381	0.000159192	0.00169282	0.00121848	1.56417	PTPN12/EGFR/MED1/COL1A1/ERBB2/ERBB4/SOX9/ERRFI1/AKT1/SNAI2/ZFP36L2/MCM7/GSTP1/PDPK1/NCL/BAIAP2/EEF1A1/PTPN11/FOXC1/MARS/STAT5B/IQGAP1/GAREM1/CBL/ZFP36L1/DAB2IP/BAG4/BECN1/PLCG1/PAX2/ZFP36	31
GO:0043297	apical junction assembly	biological process	46/9065	61/17381	0.000161396	0.0017141	0.0012338	1.44589	PDCD6IP/ROCK1/GJA1/IKBKB/TJP1/SRF/MTDH/SNAI2/RHOA/ECT2/MPP5/CBFB/PARD6B/ACTN4/RHOC/TBCD/F11R/VCL/PRKACA/PKP2/CTNNA1/STRN/APC/TNF/ROCK2/MARVELD2/OCLN/SNAI1/PRKCH/FZD5/WDR1/DLG5/MYO1C/CLDN1/RAB13/POF1B/RUNX1/PATJ/PKN2/NPHP1/PARD6G/PARD3/DLG1/ARL2/GRHL2/CLDN19	46
GO:0031333	negative regulation of protein complex assembly	biological process	83/9065	121/17381	0.000167589	0.00177763	0.00127952	1.31522	STMN1/CDC42/PPM1A/TMSB4X/TWF1/TWF2/MAPRE1/PFN1/DDX3X/HMGB1/TMC8/CAPZB/CAPZA1/DMTN/DKK1/NOP53/TRIM9/CAPG/TMOD3/HIST3H3/TBCD/SRC/FKBP4/ARHGEF2/CTNNBIP1/OPRD1/MTPN/ARFGEF1/WASHC2C/PARK7/SPTBN1/SPTBN2/ANKRD27/RDX/SPTAN1/SPTB/VPS35/RAF1/ULK1/VDAC2/GSK3B/SMAD6/PRKCD/PTGER4/THRA/CAPZA2/EIF4EBP1/RIOK3/TMOD1/INS/HIP1R/BBS4/TFIP11/HEY2/PFN4/TBX20/MYADM/GBA/ZNF451/ADD2/MORC1/ADD1/SCIN/EPS8/KIF14/TUBB4A/LMOD…	83
[truncated: 7,628 more rows]

## Sheet: GO-CC of up-regulated genes
goID	goDescription	goType	geneRatio	bgRatio	pvalue	padj	qvalue	enrichScore	overlapGeneList	overlapGeneCount
[truncated: 1,032 more rows]

## Sheet: GO-MF of up-regulated genes
goID	goDescription	goType	geneRatio	bgRatio	pvalue	padj	qvalue	enrichScore	overlapGeneList	overlapGeneCount
[truncated: 1,753 more rows]
